# Supplementary material for: Fibrodysplasia ossificans progressiva mutant ACVR1 signals by multiple modalities in the developing zebrafish
Source: eLife. 2020 Sep 8;9:e53761. doi: 10.7554/eLife.53761 (PMC7478894; doi:10.7554/eLife.53761)
Supplement: Figure 1—figure supplement 2—source data 1. [file elife-53761-fig1-figsupp2-data1.xlsx]

## Sheet: Fig 1,S2
bmp7-/- fish		2 pooled experiments
Total number of embryos in each category
	Figure column	1	2	3	4	5	6	7	8	9	10	11	12	13	14
	Morpholino KD	none	acvr1l	none	acvr1l	none	acvr1l	none	acvr1l	none	acvr1l	none	acvr1l	none	acvr1l
	Receptor mRNA	none	none	mouse Acvr1	mouse Acvr1	mouse Acvr1-R206H	mouse Acvr1-R206H	mouse Acvr1-G328R	mouse Acvr1-G328R	mouse ligand binding mutant WT-Acvr1	mouse ligand binding mutant WT-Acvr1	mouse ligand binding mutant Acvr1-R206H	mouse ligand binding mutant Acvr1-R206H	mouse ligand binding mutant Acvr1-G328R	mouse ligand binding mutant Acvr1-G328R
	C5	0	62	0	3	0	0	0	0	0	20	0	0	0	0
	C4	0	0	0	3	0	0	0	0	0	0	0	0	0	2
	C3	0	0	0	5	0	0	0	0	0	0	0	0	0	0
	C2	0	0	0	2	0	0	1	0	0	0	0	0	0	1
	C1	0	0	0	3	0	0	0	1	0	0	0	0	0	0
	WT	70	0	18	12	0	0	8	1	21	0	0	0	8	0
	V1	0	0	0	0	3	2	5	6	0	0	2	2	7	9
	V2	0	0	0	0	2	2	7	11	0	0	1	3	3	5
	V3	0	0	0	0	3	3	10	28	0	0	2	4	13	22
	V4	0	0	0	0	4	6	13	18	0	0	4	11	13	9
	V5	0	0	0	0	16	18	9	15	0	0	25	25	8	1
	total	70	62	18	28	28	31	53	80	21	20	34	45	52	49
Percent embryos in each category
		1	2	3	4	5	6	7	8	9	10	11	12	13	14
		none	acvr1l	none	acvr1l	none	acvr1l	none	acvr1l	none	acvr1l	none	acvr1l	none	acvr1l
		none	none	mouse Acvr1	mouse Acvr1	mouse Acvr1-R206H	mouse Acvr1-R206H	mouse Acvr1-G328R	mouse Acvr1-G328R	mouse ligand binding mutant WT-Acvr1	mouse ligand binding mutant WT-Acvr1	mouse ligand binding mutant Acvr1-R206H	mouse ligand binding mutant Acvr1-R206H	mouse ligand binding mutant Acvr1-G328R	mouse ligand binding mutant Acvr1-G328R
C5	1	0	100	0	10.7143	0	0	0	0	0	100	0	0	0	0
C4	2	0	0	0	10.7143	0	0	0	0	0	0	0	0	0	4.08163
C3	3	0	0	0	17.8571	0	0	0	0	0	0	0	0	0	0
C2	4	0	0	0	7.14286	0	0	1.88679	0	0	0	0	0	0	2.04082
C1	5	0	0	0	10.7143	0	0	0	1.25	0	0	0	0	0	0
WT	6	100	0	100	42.8571	0	0	15.0943	1.25	100	0	0	0	15.3846	0
V1	7	0	0	0	0	10.7143	6.45161	9.43396	7.5	0	0	5.88235	4.44444	13.4615	18.3673
V2	8	0	0	0	0	7.14286	6.45161	13.2075	13.75	0	0	2.94118	6.66667	5.76923	10.2041
V3	9	0	0	0	0	10.7143	9.67742	18.8679	35	0	0	5.88235	8.88889	25	44.898
V4	10	0	0	0	0	14.2857	19.3548	24.5283	22.5	0	0	11.7647	24.4444	25	18.3673
V5	11	0	0	0	0	57.1429	58.0645	16.9811	18.75	0	0	73.5294	55.5556	15.3846	2.04082
	Figure Column number	1	2	3	4	5	6	7	8	9	10	11	12	13	14
		1	2	3	4	5	6	7	8	9	10	11	12	13	14
		1	2	3	4	5	6	7	8	9	10	11	12	13	14
		1	2	3	4	5	6	7	8	9	10	11	12	13	14
		1	2	3	4	5	6	7	8	9	10	11	12	13	14
		1	2	3	4	5	6	7	8	9	10	11	12	13	14
		1	2	3	4	5	6	7	8	9	10	11	12	13	14
		1	2	3	4	5	6	7	8	9	10	11	12	13	14
		1	2	3	4	5	6	7	8	9	10	11	12	13	14
		1	2	3	4	5	6	7	8	9	10	11	12	13	14
		1	2	3	4	5	6	7	8	9	10	11	12	13	14
