# Supplementary material for: Fibrodysplasia ossificans progressiva mutant ACVR1 signals by multiple modalities in the developing zebrafish
Source: eLife. 2020 Sep 8;9:e53761. doi: 10.7554/eLife.53761 (PMC7478894; doi:10.7554/eLife.53761)
Supplement: Figure 1—figure supplement 2—source data 2. [file elife-53761-fig1-figsupp2-data2.xlsx]

## Sheet: Sheet1
Condition	Image	Expriment	Surface area of ch2 (um^2)	Sum flourescence of Ch3 in surfaces	sum/area			notes
no injection	6-21-20 10:50 #1	2020-03-07	416927	16686674	40.023			ch1	sytox green
no injection	6-21-20 10:53 #2	2020-03-07	469274	22016248	46.9155			ch2	beta catenin
no injection	6-21-20 10:58 #3	2020-03-07	447474	15056422	33.6476			ch3	HA tag
no injection	6-22-20 11:47 #1	2020-06-13	460536	27307338	59.2947
no injection	6-22-20 11:48 #2	2020-06-13	671174	32423067	48.308
no injection	6-22-20 11:52 #3	2020-06-13	593579	25988907	43.7834
mWT	6-21-20 10:21 #1	2020-06-15	469151	45416482	96.8056
mWT	6-21-20 10:23 #2	2020-06-15	567129	75100424	132.422
mWT	6-21-20 10:31 #3	2020-06-15	1.00851e+06	166361802	164.957
mWT	6-21-20 10:37 #4	2020-06-15	286182	69778683	243.826
mWT x2	6-22-20 10:54 #3	2020-06-15	391086	67410961	172.369
mRH	6-21-20 9:52 #2	2020-03-07	308577	15706167	50.8986
mRH	6-21-20 9:57 #3	2020-03-07	405470	39014420	96.2201
mRH	6-21-20 10:02 #4	2020-03-07	543297	106096852	195.283
mRH	6-21-20 10:06 #5	2020-03-07	524993	82231703	156.634
mRH	6-21-20 10:11 #6	2020-03-07	426429	106467891	249.673
mRH	6-23-20 12:39 #1	2020-06-13	573963	33162741	57.7785
mRH	6-23-20 12:44 #2	2020-06-13	265195	35263430	132.972
mGR	6-21-20 10:45 #1	2020-06-13	473434	17656873	37.2953
mGR	6-22-20 9:58 #1	2020-03-07	547461	35253216	64.3941
mGR	6-22-20 10:17 #3	2020-03-07	492493	29298932	59.4911
mGR	6-22-20 10:25 #5	2020-03-07	506851	31420476	61.9916
mGR	6-23-20 10:36 #1	2020-06-15	295598	86547511	292.788
mGR	6-23-20 10:44 #2	2020-06-15	333671	63541092	190.431
mGR	6-23-20 2:10 #1	2020-06-13	611008	68155217	111.546
mGR	6-23-20 2:14 #2	2020-06-13	752923	83387497	110.752
delmWT	6-22-20 11:01 #1	2020-06-15	542418	52102143	96.0553
delmWT	6-22-20 11:06 #2	2020-06-15	657362	69478813	105.693
delmWT	6-22-20 11:11 #3	2020-06-15	821322	78910050	96.0769
delmWT	6-22-20 11:18 #4	2020-06-15	533035	44978442	84.3818
delmWT	6-22-20 11:22 #5	2020-06-15	437005	35581718	81.4217
delmWT	6-22-20 11:26 #6	2020-06-15	865744	61076044	70.5475
delmRH	6-22-20 12:04 #1	2020-06-13	608320	26792995	44.0442
delmRH	6-22-20 12:07 #2	2020-06-13	650660	48011604	73.7891
delmRH	6-22-20 12:09 #3	2020-06-13	567778	38643582	68.0611
delmRH	6-22-20 12:15 #5	2020-06-13	480339	50029862	104.155
delmRH	6-23-20 12:49 #1	2020-06-15	829551	50041316	60.3234
delmRH	6-23-20 1:07 #2	2020-06-15	509199	33947681	66.6688
delmRH	6-23-20 1:15 #3	2020-06-15	454717	22980356	50.5377
delmGR	6-22-20 9:39 #1	2020-03-07	574795	22861388	39.7731
delmGR	6-22-20 9:43 #2	2020-03-07	374610	18600914	49.6541
delmGR	6-22-20 9:47 #3	2020-03-07	480663	19454915	40.4752
delmGR	6-22-20 9:51 #4	2020-03-07	221061	21025516	95.1119
delmGR	6-23-20 11:00 #1	2020-06-15	182466	56377749	308.977
delmGR	6-23-20 11:23 #2	2020-06-15	443821	18321614	41.2815
delmGR	6-23-20 11:28 #3	2020-06-15	350325	37915870	108.231

## Sheet: HA Bcat
	No Injection	mWT	mRH	mGR	delmWT	delmRH	delmGR
	40.023	96.8056	50.8986	37.2953	96.0553	44.0442	39.7731
	46.9155	132.422	96.2201	64.3941	105.693	73.7891	49.6541
	33.6476	164.957	195.283	59.4911	96.0769	68.0611	40.4752
	59.2947	243.826	156.634	61.9916	84.3818	104.155	95.1119
	48.308	172.369	249.673	292.788	81.4217	60.3234	41.2815
	43.7834		57.7785	190.431	70.5475	66.6688	108.231
			132.972	111.546		50.5377	308.977
				110.752
1st Quartile	40.9631	132.422	76.9993	61.3664	82.1617	55.4305	40.8783
3rd Quartile	47.9599	172.369	175.959	131.267	96.0715	70.9251	101.671
InterQuartile Range	6.99674	39.9466	98.9593	69.9003	13.9098	15.4946	60.7929
1.8x IQR	12.5941	71.9039	178.127	125.821	25.0376	27.8902	109.427
Lower Limit	28.369	60.5181	-101.127	-64.4541	57.1241	27.5403	-68.5489
Upper Limit	60.554	244.273	354.085	257.087	121.109	98.8154	211.098
Outliers removed	No Injection	mWT	mRH	mGR	delmWT	delmRH	delmGR
	40.023	96.8056	50.8986	37.2953	96.0553	44.0442	39.7731
	46.9155	132.422	96.2201	64.3941	105.693	73.7891	49.6541
	33.6476	164.957	195.283	59.4911	96.0769	68.0611	40.4752
	59.2947	243.826	156.634	61.9916	84.3818	60.3234	95.1119
	48.308	172.369	249.673	190.431	81.4217	66.6688	41.2815
	43.7834		57.7785	111.546	70.5475	50.5377	108.231
			132.972	110.752
Average	45.3287	162.076	134.209	90.8428	89.0294	60.5707	62.4211
STD Dev	8.64211	54.628	72.7918	51.8409	12.6315	11.3302	30.8922
T-tests
No Inj		0.00823371	0.017692	0.059658	6.96037e-05	0.0269825	0.241397
mWT			0.466406	0.0507672	0.0387374	0.0130826	0.0108125
mRH				0.225942	0.154418	0.0366372	0.0438672
mGR					0.931256	0.178515	0.25069
delmWT						0.00216924	0.094109
delmRH							0.094109
delmGR
