# Supplementary material for: Fibrodysplasia ossificans progressiva mutant ACVR1 signals by multiple modalities in the developing zebrafish
Source: eLife. 2020 Sep 8;9:e53761. doi: 10.7554/eLife.53761 (PMC7478894; doi:10.7554/eLife.53761)
Supplement: Figure 1—source data 1. [file elife-53761-fig1-data1.xlsx]

## Sheet: Fig 1e
WT Fish	4 pooled experiments
Total number of embryos in each category
	figure column	1	2	3	4	5	6
	Morpholino KD	none	none	none	acvr1l	acvr1l	acvr1l
	Receptor mRNA	no injection	mouse WT-Acvr1	mouse ligand binding mutant WT-Acvr1	no injection	mouse WT-Acvr1	mouse ligand binding mutant WT-Acvr1
	C5	0	0	0	146	5	109
	C4	0	0	0	7	5	9
	C3	0	0	0	0	24	0
	C2	0	0	1	0	5	0
	C1	0	0	0	0	11	0
	WT	240	115	139	0	44	0
	V1	0	0	0	0	0	0
	V2	0	0	0	0	0	0
	V3	0	0	0	0	0	0
	V4	0	0	0	0	0	0
	V5	0	0	0	0	0	0
	Total	240	115	140	153	94	118
Percent embryos in each category
	figure column	1	2	3	4	5	6
	Morpholino KD	none	none	none	acvr1l	acvr1l	acvr1l
	Receptor mRNA	no injection	mouse WT-Acvr1	mouse ligand binding mutant WT-Acvr1	no injection	mouse WT-Acvr1	mouse ligand binding mutant WT-Acvr1
C5	1	0	0	0	95.4248	5.31915	92.3729
C4	2	0	0	0	4.57516	5.31915	7.62712
C3	3	0	0	0	0	25.5319	0
C2	4	0	0	0.714286	0	5.31915	0
C1	5	0	0	0	0	11.7021	0
WT	6	100	100	99.2857	0	46.8085	0
V1	7	0	0	0	0	0	0
V2	8	0	0	0	0	0	0
V3	9	0	0	0	0	0	0
V4	10	0	0	0	0	0	0
V5	11	0	0	0	0	0	0
	Figure Column number	1	2	3	4	5	6
		1	2	3	4	5	6
		1	2	3	4	5	6
		1	2	3	4	5	6
		1	2	3	4	5	6
		1	2	3	4	5	6
		1	2	3	4	5	6
		1	2	3	4	5	6
		1	2	3	4	5	6
		1	2	3	4	5	6
		1	2	3	4	5	6

## Sheet: Fig 1f
WT Fish	3 pooled experiments
Total number of embryos in each category
	Figure column	1	2	3	4	5	6
	Morpholino KD	none	none	none	acvr1l	acvr1l	acvr1l
	Receptor mRNA	no injection	mouse Acvr1-R206H	mouse ligand binding mutant Acvr1-R206H	no injection	mouse Acvr1-R206H	mouse ligand binding mutant Acvr1-R206H
	C5	0	0	0	146	0	0
	C4	0	0	0	7	0	2
	C3	0	0	0	0	0	1
	C2	0	0	0	0	0	2
	C1	0	0	0	0	0	0
	WT	240	2	6	0	0	0
	V1	0	5	15	0	7	9
	V2	0	6	6	0	12	17
	V3	0	6	9	0	15	32
	V4	0	5	4	0	10	16
	V5	0	46	44	0	29	12
	Total	240	70	84	153	73	91
Percent embryos in each category
	Figure column	1	2	3	4	5	6
	Morpholino KD	none	none	none	acvr1l	acvr1l	acvr1l
	Receptor mRNA	no injection	mouse Acvr1-R206H	mouse ligand binding mutant Acvr1-R206H	no injection	mouse Acvr1-R206H	mouse ligand binding mutant Acvr1-R206H
C5	1	0	0	0	95.4248	0	0
C4	2	0	0	0	4.57516	0	2.1978
C3	3	0	0	0	0	0	1.0989
C2	4	0	0	0	0	0	2.1978
C1	5	0	0	0	0	0	0
WT	6	100	2.85714	7.14286	0	0	0
V1	7	0	7.14286	17.8571	0	9.58904	9.89011
V2	8	0	8.57143	7.14286	0	16.4384	18.6813
V3	9	0	8.57143	10.7143	0	20.5479	35.1648
V4	10	0	7.14286	4.7619	0	13.6986	17.5824
V5	11	0	65.7143	52.381	0	39.726	13.1868
	Figure Column number	1	2	3	4	5	6
		1	2	3	4	5	6
		1	2	3	4	5	6
		1	2	3	4	5	6
		1	2	3	4	5	6
		1	2	3	4	5	6
		1	2	3	4	5	6
		1	2	3	4	5	6
		1	2	3	4	5	6
		1	2	3	4	5	6
		1	2	3	4	5	6

## Sheet: Fig 1g
WT Fish	4 pooled experiments
Total number of embryos in each category
	Figure column	1	2	3	4	5	6
	Morpholino KD	none	none	none	acvr1l	acvr1l	acvr1l
	Receptor mRNA	no injection	mouse Acvr1-G328R	mouse ligand binding mutant Acvr1-G328R	no injection	mouse Acvr1-G328R	mouse ligand binding mutant Acvr1-G328R
	C5	0	0	0	146	0	0
	C4	0	0	0	7	0	0
	C3	0	0	0	0	0	0
	C2	0	0	0	0	0	0
	C1	0	0	0	0	0	0
	WT	240	9	10	0	0	0
	V1	0	11	11	0	4	11
	V2	0	15	7	0	18	20
	V3	0	18	26	0	29	22
	V4	0	28	12	0	25	18
	V5	0	7	13	0	2	0
	Total	240	88	79	153	78	71
Percent embryos in each category
	Figure column	1	2	3	4	5	6
	Morpholino KD	none	none	none	acvr1l	acvr1l	acvr1l
	Receptor mRNA	no injection	mouse Acvr1-G328R	mouse ligand binding mutant Acvr1-G328R	no injection	mouse Acvr1-G328R	mouse ligand binding mutant Acvr1-G328R
C5	1	0	0	0	95.4248	0	0
C4	2	0	0	0	4.57516	0	0
C3	3	0	0	0	0	0	0
C2	4	0	0	0	0	0	0
C1	5	0	0	0	0	0	0
WT	6	100	10.2273	12.6582	0	0	0
V1	7	0	12.5	13.9241	0	5.12821	15.493
V2	8	0	17.0455	8.86076	0	23.0769	28.169
V3	9	0	20.4545	32.9114	0	37.1795	30.9859
V4	10	0	31.8182	15.1899	0	32.0513	25.3521
V5	11	0	7.95455	16.4557	0	2.5641	0
	Figure Column number	1	2	3	4	5	6
		1	2	3	4	5	6
		1	2	3	4	5	6
		1	2	3	4	5	6
		1	2	3	4	5	6
		1	2	3	4	5	6
		1	2	3	4	5	6
		1	2	3	4	5	6
		1	2	3	4	5	6
		1	2	3	4	5	6
		1	2	3	4	5	6
