# Supplementary material for: Fibrodysplasia ossificans progressiva mutant ACVR1 signals by multiple modalities in the developing zebrafish
Source: eLife. 2020 Sep 8;9:e53761. doi: 10.7554/eLife.53761 (PMC7478894; doi:10.7554/eLife.53761)
Supplement: Figure 2—source data 1. [file elife-53761-fig2-data1.xlsx]

## Sheet: Fig 2h Mean
Mean pSmad1/5 flourescence
Condition	No Injection	8MO	mWT	mWT MO	delmWT	delmWT MO	mRH	mRH MO	delmRH	delmRH MO	mGR	mGR MO	delmGR	delmGR MO
	12.17	8.34225	13.4353	13.7671	12.9659	10.4513	37.3567	47.784	22.1299	35.0394	38.1781	23.1324	29.941	21.8175
	11.1685	12.2591	22.1263	11.6281	15.165	10.5973	43.2725	26.4395	45.168	34.1877	29.4498	33.7281	33.0106	13.8183
	10.1942	11.3923	27.0667	18.6104	17.2407	8.88874	36.2383	43.9179	35.2018	21.2143	42.4489	17.8145	19.8649	27.1497
	8.85802	9.90782	19.226	23.91	25.9847	8.12058	48.0786	27.1693	48.0307	57.9697	23.047	28.043	20.6485	35.5226
	15.8143	10.9482	13.2655	16.711	25.4906	10.2219	58.4362	39.3889	51.8076	27.2103	41.917	18.3558	28.4595	18.2152
	21.887	13.2697	18.4242	12.6889	15.8316	12.775	29.9751	14.8769	41.0198	30.0374	28.4386	99.6209	69.5016	29.4631
	15.4041	14.3361	14.9802	14.6727	17.4595	16.6841	37.0181	38.0638	47.9511	52.3839	20.9789	17.9103	25.7645	31.0193
	13.1246	4.03602	13.4893	13.7556	15.731		22.7864	25.7365	17.7205	62.0439	24.4705	27.0657	28.2279	16.5249
	21.6577	10.1193	15.2106	23.7718	28.2627		21.5879	55.2673		52.2751	36.3406	32.26	55.9619	16.7854
	12.5789	9.85778	22.4252				45.8167	17.0101		45.941	52.8382		18.2844	20.559
	10.594	11.7572					31.7611	46.2707		49.1119	26.1987		47.8917	22.0735
	16.9431	11.0953					17.9782	14.1792						38.0557
	18.8314	9.0161					49.6223	35.917
	20.9459	11.0637					40.3932	42.2534
	16.0139	10.1671						41.4294
	17.4683							17.9557
	14.3566							44.1401
	19.3989
Average	15.4116	10.5045	17.9649	16.6128	19.348	11.1056	37.1658	33.9882	38.6287	42.4922	33.1188	33.1034	34.3233	24.2503
Std dev	4.07667	2.36629	4.72562	4.59306	5.62287	2.86352	11.598	12.8533	12.6411	13.5536	9.98074	25.6642	16.4586	7.8855
T-test two tailed unequal variance
No injection		0.000182651	0.16938	0.516783	0.0855218	0.00905533	5.95115e-06	1.71896e-05	0.00109227	4.51139e-05	0.000112724	0.0730509	0.00338537	0.00276109
8MO				0.00369097		0.639092		9.70702e-07		1.2116e-05		0.0296876		6.65424e-05
compared to same receptor w/o MO				0.535861		0.00235902		0.475641		0.532603		0.998683		0.0861693
Closest value to mean	15.4041	9.85778	18.4242	16.711	17.4595	10.5973	37.0181	35.917	41.0198	45.941	36.3406	33.7281	33.0106	22.0735
embryo	20190303.WTTU.noinjection.1249pm.5.calibrated_[ims1_2020-05-13T12-53-41.569].xls	20190206.WTTU.8MO.1147am.1.calibrated_[ims1_2020-05-13T12-53-03.928].xls	20190501.WTTU.mWT.5.457pm.calibrated_[ims1_2020-05-13T12-53-38.648].xls	20190501.WTTU.mWT+8MO.3.524pm.calibrated_[ims1_2020-05-13T12-53-36.132].xls	20190308.WTTU.delmWT.323pm.1.calibrated_[ims1_2020-05-13T12-53-16.118].xls	20190303.WTTU.delmWT+8MO.317pm.2.calibrated_[ims1_2020-05-13T12-53-13.931].xls	20190303.WTTU.mRH.402pm.3.calibrated_[ims1_2020-05-13T12-53-31.976].xls	20190210.20190131.WTTU.mRH.8MO.1111am.5.calibrated_[ims1_2020-05-13T12-53-27.477].xls	20190210.20190131.WTTU.delmRHx3.113am.4.calibrated_[ims1_2020-05-13T12-53-11.993].xls	20190210.20190131.WTTU.delmRH.8MO.1206am.2.calibrated_[ims1_2020-05-13T12-53-09.556].xls	20190304.WTTU.mGR.401pm.3.calibrated_[ims1_2020-05-13T12-53-24.258].xls	20190304.WTTU.mGR+8MO.453pm.6.calibrated_[ims1_2020-05-13T12-53-21.899].xls	20190304.WTTU.delGR.226pm.2.calibrated_[ims1_2020-05-13T12-53-07.318].xls	20181010.8MO+delmGR.1.255pm.calibrated_[ims1_2020-05-13T12-53-18.305] lower embryo.xls
				18.6104		10.4513		38.0638					28.4595	27.1497
				20190501.WTTU.mWT+8MO.1.509pm.calibrated_[ims1_2020-05-13T12-53-36.132].xls		20190206.WTTU.delmWT.8MO.205pm.1.calibrated_[ims1_2020-05-13T12-53-13.931].xls		20190303.WTTU.mRH+8MO.426pm.2.calibrated_[ims1_2020-05-13T12-53-27.477].xls					20190211.20190103.WTTU.delmGR.323pm.2.calibrated_[ims1_2020-05-13T12-53-07.318].xls	20190411.WTTU.delmGR+8MO.3.257pm.calibrated_[ims1_2020-05-13T12-53-18.305].xls
