# Supplementary material for: Fibrodysplasia ossificans progressiva mutant ACVR1 signals by multiple modalities in the developing zebrafish
Source: eLife. 2020 Sep 8;9:e53761. doi: 10.7554/eLife.53761 (PMC7478894; doi:10.7554/eLife.53761)
Supplement: Figure 3—source data 1. [file elife-53761-fig3-data1.xlsx]

## Sheet: Fig 3b
bmp7-/- fish	2 pooled experiments
Total number of embryos in each category
	Figure column	1	2	3	4	5
	Morpholino KD	none	none	acvr1l	acvr1l	acvr1l
	Receptor mRNA	no injection	no injection	noinjection	human WT-ACVR1	human WT-ACVR1
	Ligand mRNA	none	bmp7	bmp7	none	bmp7
	AUB	No Injection	no inj	8MO	8MO+hWT	8MO+hWT
	C5	240	11	141	101	28
	C4	0	10	2	0	17
	C3	0	6	0	0	16
	C2	0	10	0	0	13
	C1	0	20	0	0	10
	WT	0	89	0	0	3
	V1	0	1	0	0	25
	V2	0	0	0	0	8
	V3	0	3	0	0	0
	V4	0	0	0	0	0
	V5	0	0	0	0	0
	Total	240	150	143	101	120
Percent embryos in each category
	Figure column	1	2	3	4	5
	Morpholino KD	none	none	acvr1l	acvr1l	acvr1l
	Receptor mRNA	no injection	no injection	noinjection	human WT-ACVR1	human WT-ACVR1
	Ligand mRNA	none	bmp7	bmp7	none	bmp7
C5	1	100	7.33333	98.6014	100	23.3333
C4	2	0	6.66667	1.3986	0	14.1667
C3	3	0	4	0	0	13.3333
C2	4	0	6.66667	0	0	10.8333
C1	5	0	13.3333	0	0	8.33333
WT	6	0	59.3333	0	0	2.5
V1	7	0	0.666667	0	0	20.8333
V2	8	0	0	0	0	6.66667
V3	9	0	2	0	0	0
V4	10	0	0	0	0	0
V5	11	0	0	0	0	0
	Figure Column number	1	2	3	4	5
		1	2	3	4	5
		1	2	3	4	5
		1	2	3	4	5
		1	2	3	4	5
		1	2	3	4	5
		1	2	3	4	5
		1	2	3	4	5
		1	2	3	4	5
		1	2	3	4	5
		1	2	3	4	5

## Sheet: Fig 3c
bmp7-/- fish	2 pooled experiments
Total number of embryos in each category
	Figure column	1	2	3	4	5
	Morpholino KD	none	none	acvr1l	acvr1l	acvr1l
	Receptor mRNA	no injection	no injection	noinjection	human ACVR1-R206H	human ACVR1-R206H
	Ligand mRNA	none	bmp7	bmp7	none	bmp7
	AUB	No Injection	no inj	8MO	8MO+hWT	8MO+hWT
	C5	177	0	130	8	4
	C4	0	1	2	0	3
	C3	0	1	0	1	0
	C2	0	3	0	0	1
	C1	0	8	0	1	0
	WT	0	43	0	0	0
	V1	0	2	0	30	13
	V2	0	8	0	27	17
	V3	0	7	0	20	13
	V4	0	2	0	6	8
	V5	0	3	0	7	27
	Total	177	78	132	100	86
Percent embryos in each category
	Figure column	1	2	3	4	5
	Morpholino KD	none	none	acvr1l	acvr1l	acvr1l
	Receptor mRNA	no injection	no injection	noinjection	human WT-ACVR1	human WT-ACVR1
	Ligand mRNA	none	bmp7	bmp7	none	bmp7
C5	1	100	0	98.4848	8	4.65116
C4	2	0	1.28205	1.51515	0	3.48837
C3	3	0	1.28205	0	1	0
C2	4	0	3.84615	0	0	1.16279
C1	5	0	10.2564	0	1	0
WT	6	0	55.1282	0	0	0
V1	7	0	2.5641	0	30	15.1163
V2	8	0	10.2564	0	27	19.7674
V3	9	0	8.97436	0	20	15.1163
V4	10	0	2.5641	0	6	9.30233
V5	11	0	3.84615	0	7	31.3953
	Figure Column number	1	2	3	4	5
		1	2	3	4	5
		1	2	3	4	5
		1	2	3	4	5
		1	2	3	4	5
		1	2	3	4	5
		1	2	3	4	5
		1	2	3	4	5
		1	2	3	4	5
		1	2	3	4	5
		1	2	3	4	5

## Sheet: Fig 3d
bmp7-/- fish	2 pooled experiments
Total number of embryos in each category
	Figure column	1	2	3	4	5
	Morpholino KD	none	none	acvr1l	acvr1l	acvr1l
	Receptor mRNA	no injection	no injection	noinjection	human ACVR1-G328R	human ACVR1-G328R
	Ligand mRNA	none	bmp7	bmp7	none	bmp7
	AUB	No Injection	no inj	8MO	8MO+hWT	8MO+hWT
	C5	52	0	55	23	0
	C4	0	1	0	16	0
	C3	0	0	0	12	0
	C2	0	0	0	2	0
	C1	0	0	0	0	0
	WT	0	18	0	0	0
	V1	0	11	0	0	1
	V2	0	5	0	3	12
	V3	0	10	0	0	24
	V4	0	0	0	0	12
	V5	0	1	0	0	33
	Total	52	46	55	56	82
Percent embryos in each category
	Figure column	1	2	3	4	5
	Morpholino KD	none	none	acvr1l	acvr1l	acvr1l
	Receptor mRNA	no injection	no injection	noinjection	human WT-ACVR1	human WT-ACVR1
	Ligand mRNA	none	bmp7	bmp7	none	bmp7
C5	1	100	0	100	41.0714	0
C4	2	0	2.17391	0	28.5714	0
C3	3	0	0	0	21.4286	0
C2	4	0	0	0	3.57143	0
C1	5	0	0	0	0	0
WT	6	0	39.1304	0	0	0
V1	7	0	23.913	0	0	1.21951
V2	8	0	10.8696	0	5.35714	14.6341
V3	9	0	21.7391	0	0	29.2683
V4	10	0	0	0	0	14.6341
V5	11	0	2.17391	0	0	40.2439
	Figure Column number	1	2	3	4	5
		1	2	3	4	5
		1	2	3	4	5
		1	2	3	4	5
		1	2	3	4	5
		1	2	3	4	5
		1	2	3	4	5
		1	2	3	4	5
		1	2	3	4	5
		1	2	3	4	5
		1	2	3	4	5

## Sheet: Fig 3e
bmp7-/- fish		2 pooled experiments
Total number of embryos in each category
	Figure column	1	2	3	4	5	6	7	8
	Morpholino KD	none	none	acvr1l	acvr1l	acvr1l	acvr1l	acvr1l	acvr1l
	Receptor mRNA	none	none	none	none	mouse WT-Acvr1	mouse WT-Acvr1	mouse ligand binding mutant WT-Acvr1	mouse ligand binding mutant WT-Acvr1
	Ligand mRNA	none	bmp7	none	bmp7	none	bmp7
	C5	383	6	143	132	164	41	95	83
	C4	0	3	0	2	4	14	0	0
	C3	0	1	0	0	0	15	0	1
	C2	0	5	0	0	0	17	0	0
	C1	0	13	0	0	0	13	0	0
	WT	0	77	0	0	0	10	0	0
	V1	0	1	0	0	0	19	0	0
	V2	0	3	0	0	0	14	0	0
	V3	0	0	0	0	0	6	0	0
	V4	0	0	0	0	0	9	0	0
	V5	0	0	0	0	0	0	0	0
	total	383	109	143	134	168	158	95	84
Percent embryos in each category
		Figure column	1	2	3	4	5	6	7
		Morpholino KD	none	none	acvr1l	acvr1l	acvr1l
		Receptor mRNA	no injection	no injection	noinjection	mouse WT-Acvr1	mouse WT-Acvr1	mouse ligand binding mutant WT-Acvr1	mouse ligand binding mutant WT-Acvr1
		Ligand mRNA	none	bmp7	bmp7	none	bmp7
C5	1	100	5.50459	100	98.5075	97.619	25.9494	100	98.8095
C4	2	0	2.75229	0	1.49254	2.38095	8.86076	0	0
C3	3	0	0.917431	0	0	0	9.49367	0	1.19048
C2	4	0	4.58716	0	0	0	10.7595	0	0
C1	5	0	11.9266	0	0	0	8.22785	0	0
WT	6	0	70.6422	0	0	0	6.32911	0	0
V1	7	0	0.917431	0	0	0	12.0253	0	0
V2	8	0	2.75229	0	0	0	8.86076	0	0
V3	9	0	0	0	0	0	3.79747	0	0
V4	10	0	0	0	0	0	5.6962	0	0
V5	11	0	0	0	0	0	0	0	0
	Figure Column number	1	2	3	4	5	6	7	8
		1	2	3	4	5	6	7	8
		1	2	3	4	5	6	7	8
		1	2	3	4	5	6	7	8
		1	2	3	4	5	6	7	8
		1	2	3	4	5	6	7	8
		1	2	3	4	5	6	7	8
		1	2	3	4	5	6	7	8
		1	2	3	4	5	6	7	8
		1	2	3	4	5	6	7	8
		1	2	3	4	5	6	7	8

## Sheet: Fig 3f
bmp7-/- fish		2 pooled experiments
Total number of embryos in each category
	Figure column	1	2	3	4	5	6	7	8
	Morpholino KD	none	none	acvr1l	acvr1l	acvr1l	acvr1l	acvr1l	acvr1l
	Receptor mRNA	none	none	none	none	mouse Acvr1-R206H	mouse Acvr1-R206H	mouse ligand binding mutant Acvr1-R206H	mouse ligand binding mutant Acvr1-R206H
	Ligand mRNA	none	bmp7	none	bmp7
	C5	383	6	143	132	0	4	12	43
	C4	0	3	0	2	0	0	11	6
	C3	0	1	0	0	0	1	3	1
	C2	0	5	0	0	0	2	1	2
	C1	0	13	0	0	0	1	0	0
	WT	0	77	0	0	0	0	0	0
	V1	0	1	0	0	12	4	9	17
	V2	0	3	0	0	30	18	15	23
	V3	0	0	0	0	19	17	4	8
	V4	0	0	0	0	7	17	0	0
	V5	0	0	0	0	4	30	0	0
	total	383	109	143	134	72	94	55	100
Percent embryos in each category
		Figure column	1	2	3	4	5	6	7
		Morpholino KD	none	none	acvr1l	acvr1l	acvr1l
		Receptor mRNA	no injection	no injection	noinjection	mouse WT-Acvr1	mouse WT-Acvr1	mouse ligand binding mutant WT-Acvr1	mouse ligand binding mutant WT-Acvr1
		Ligand mRNA	none	bmp7	bmp7	none	bmp7
C5	1	100	5.50459	100	98.5075	0	4.25532	21.8182	43
C4	2	0	2.75229	0	1.49254	0	0	20	6
C3	3	0	0.917431	0	0	0	1.06383	5.45455	1
C2	4	0	4.58716	0	0	0	2.12766	1.81818	2
C1	5	0	11.9266	0	0	0	1.06383	0	0
WT	6	0	70.6422	0	0	0	0	0	0
V1	7	0	0.917431	0	0	16.6667	4.25532	16.3636	17
V2	8	0	2.75229	0	0	41.6667	19.1489	27.2727	23
V3	9	0	0	0	0	26.3889	18.0851	7.27273	8
V4	10	0	0	0	0	9.72222	18.0851	0	0
V5	11	0	0	0	0	5.55556	31.9149	0	0
	Figure Column number	1	2	3	4	5	6	7	8
		1	2	3	4	5	6	7	8
		1	2	3	4	5	6	7	8
		1	2	3	4	5	6	7	8
		1	2	3	4	5	6	7	8
		1	2	3	4	5	6	7	8
		1	2	3	4	5	6	7	8
		1	2	3	4	5	6	7	8
		1	2	3	4	5	6	7	8
		1	2	3	4	5	6	7	8
		1	2	3	4	5	6	7	8
