# Supplementary material for: Fibrodysplasia ossificans progressiva mutant ACVR1 signals by multiple modalities in the developing zebrafish
Source: eLife. 2020 Sep 8;9:e53761. doi: 10.7554/eLife.53761 (PMC7478894; doi:10.7554/eLife.53761)
Supplement: Figure 4—source data 1. [file elife-53761-fig4-data1.xlsx]

## Sheet: Fig 4n Mean
Mean pSmad1/5 flourescence
Condition	No Injection	bmp7	acta	bmp7MO	actaMO	mRH	mRH bmp7	mRH acta	delmRH	delmRH bmp7	delmRH acta
	199.603	548.453	235.219	252.496	228.94	73.3566	416.023	302.296	263.998	191.303	119.763
	168.862	297.942	223.711	262.405	221.748	55.3181	456.315	330.155	140.171	128.014	180.087
	147.395	336.82	225.882	207.475	228.073	124.888	487.809	229.35	402.929	194.508	165.707
	172.718	271.809	220.567	178.267	177.852	261.188	890.945	477.852	462.794	537.751	327.318
	224.115	349.834	139.984	140.005	95.5375	318.742	381.713	215.471	364.986	410.15	848.169
	209.757	275.721	147.403	118.47	94.9733	213.031	349.95	239.659	464.837	636.983	467.05
	205.952	321.704	118.112		98.6636	351.799	501.14	382.97	320.878	367.529	261.879
	207.376	296.436	124.887		105.968	365.787	914.293	520.839	143.629	163.761	313.238
		216.352						446.944	325.842	398.606	265.823
		476.779							383.225	208.832	118.525
									571.51	706.432	339.382
Average	191.972	339.185	179.471	193.186	156.469	220.514	549.774	349.504	349.527	358.534	309.722
Std dev	26.0011	100.185	51.0459	58.5602	63.7899	124.09	223.694	113.751	132.117	200.847	207.432
Two tailed, unequal variance
No injection		0.00107833	0.550341	0.963626	0.177962	0.542967	0.00263761	0.00298443	0.00265996	0.020795	0.0908857
bmp7			0.000637748	0.00248112	0.000268487	0.0465537	0.0348188	0.837192	0.841205	0.780973	0.68038
mRH							0.00392093	0.0426351
delmRH										0.902549	0.598369
acta					0.439782
Closest value to mean	199.603	336.82	147.403	207.475	177.852	213.031	501.14	330.155	364.986	367.529	313.238
embryo	20200301Aubnoinj11003.calibrated - Copy_[ims1_2020-04-03T13-57-14.389] mean.xls	20200301Aubbmp731138.calibrated - Copy_[ims1_2020-04-03T13-57-21.529].xls	20200316.AUB.acta.2.225.calibrated - Copy_[ims1_2020-04-03T13-57-25.607].xls	20200301Aubbmp78MO41259.cailbrated - Copy_[ims1_2020-04-03T13-57-27.185].xls	20200301Aubacta8MO4312.calibrated - Copy_[ims1_2020-04-03T13-57-29.201].xls	20200316.AUB.8MO.mRH.3.1055.calibrated - Copy_[ims1_2020-04-03T13-57-31.154] mean.xls	20200316.AUB.8MO.mRH.bmp7.3.949.calibrated - Copy_[ims1_2020-04-03T13-57-33.857] mean.xls	02022020.AUB.8MO.mRH.acta.2.141.calibrated - Copy_[ims1_2020-04-03T13-57-36.278] mean.xls	20200307.Aub.8MO.delmRH.3.220.calibrated - Copy_[ims1_2020-04-03T13-57-38.950] mean.xls	20200316.AUB.8MO.delmRH.bmp7.1.449.calibrated - Copy_[ims1_2020-04-03T13-57-16.545] mean.xls	20200316.AUB.8MO.delmRH.acta.2.807.calibrated - Copy_[ims1_2020-04-03T13-57-19.076] mean.xls
				178.267				382.97	383.225	398.606	327.318
				20200314.AUB.8MO.bmp7.1.125.calibrated - Copy_[ims1_2020-04-03T13-57-27.185].xls				20200316.AUB.8MO.mRH.acta.3.1247.calibrated - Copy_[ims1_2020-04-03T13-57-36.278] mean.xls	20200316.AUB.8MO.delmRH.4.716.calibrated - Copy_[ims1_2020-04-03T13-57-38.950] mean.xls	20200316.AUB.8MO.delmRH.bmp7.3.540.calibrated - Copy_[ims1_2020-04-03T13-57-16.545] mean.xls	20200307.Aub.8MO.delmRH.acta.2.452.calibrated - Copy (2) mean.xls
