# Supplementary material for: Fibrodysplasia ossificans progressiva mutant ACVR1 signals by multiple modalities in the developing zebrafish
Source: eLife. 2020 Sep 8;9:e53761. doi: 10.7554/eLife.53761 (PMC7478894; doi:10.7554/eLife.53761)
Supplement: Figure 4—source data 3. [file elife-53761-fig4-data3.xlsx]

## Sheet: Fig 4t Mean
Mean pSmad2 flourescence
Condition	No Injection	ActA	ActA MO	mRH	mRH ActA
	116.312	205.514	397.369	104.441	197.156
	94.9618	303.142	371.065	123.237	260.581
	120.241	167.808	410.54	170.39	230.319
	255.311	342.864	166.087	150.03	345.007
	105.985	315.086	166.044	148.313	239.521
		268.369
		241.237
		316.852
Average	138.562	270.109	302.221	139.282	254.517
Std dev	65.9984	61.0233	125.102	25.6715	55.5109
T-tests compared to
noinj		0.00686431	0.0409539	0.982715	0.017476
acta			0.614342	0.000310677	0.646392
acta MO				0.0420913	0.467863
