# Supplementary material for: Fibrodysplasia ossificans progressiva mutant ACVR1 signals by multiple modalities in the developing zebrafish
Source: eLife. 2020 Sep 8;9:e53761. doi: 10.7554/eLife.53761 (PMC7478894; doi:10.7554/eLife.53761)
Supplement: Figure 4—source data 4. [file elife-53761-fig4-data4.xlsx]

## Sheet: Sheet1
Values	18323	13524	19314	13113	13832	15124	13798	13180	11706	10826	13018	15391	15671	10599	10939	13351	11555	11579	11348	10239	13320	9099	11588	14596	14754	13900	13422	14384
Min	29.0536	128.823	26.3478	150.955	31.2059	21.9206	24.7625	123.392	14.4868	27.1385	17.7818	7.74359	10.4167	23.85	26.9718	68.7121	10.375	26.3667	26.7879	76.3091	8.36667	99.5672	79.5806	36.7077	15.7722	28.557	30.3676	14.6727
Max	1266.8	706.194	665.625	934.6	970.954	880.481	891.449	1099.7	1591.67	1230.97	1222.47	2360.15	3097.91	821.306	1214.92	677.071	1040.58	1244.52	743.162	1029.78	1375.93	1215.71	1826.44	484.4	462.729	690.076	1086.9	678.658
1st Quartile	128.562	244.444	113.559	256.756	138.858	187.91	107.992	241.149	230.368	200.915	256.45	146.954	145.89	92.3743	109.774	148.956	128.208	125.873	164.223	215.272	190.152	253.443	178.902	104.478	76.9286	102.417	227.097	95.564
3rd Quartile	270.826	348.511	214.796	409.836	481.857	342.856	349.018	378.544	539.425	524.487	558.271	187.805	187.063	120.167	141.389	192.357	172.35	170.911	231.919	300.809	277.589	428.673	290.645	133.175	117.392	142.186	285.97	120.197
InterQuartile Range	142.265	104.067	101.237	153.08	342.999	154.947	241.027	137.395	309.057	323.572	301.821	40.8515	41.173	27.7922	31.615	43.401	44.142	45.0385	67.6955	85.537	87.4375	175.229	111.743	28.697	40.4634	39.7688	58.8725	24.6332
Lower Limit	0	57.1234	0	0	0	0	0	0	0	0	0	73.4213	71.7786	42.3482	52.867	70.8342	48.7524	44.8037	42.3713	61.3054	32.7645	0	0	52.8234	4.09456	30.8332	121.127	51.2242
Upper Limit	526.902	535.832	397.023	685.38	1099.25	621.76	782.867	625.855	1095.73	1106.92	1101.55	261.338	261.174	170.193	198.296	270.479	251.806	251.981	353.771	454.776	434.977	744.086	491.782	184.83	190.226	213.77	391.94	164.537
Values in	18071	13300	18693	12962	13832	14712	13777	12941	11696	10825	13017	14016	14306	9681	9787	12551	10917	10981	11310	10154	13262	9091	11326	12923	13857	12673	12442	12889
Values Out	252	224	621	151	0	412	21	239	10	1	1	1375	1365	918	1152	800	638	598	38	85	58	8	262	1673	897	1227	980	1495
Mean	205.514	303.142	167.808	342.864	315.086	268.369	241.237	316.852	397.369	371.065	410.54	166.087	166.044	104.441	123.237	170.39	150.03	148.313	197.156	260.581	230.319	345.007	239.521	116.312	94.9618	120.241	255.311	105.985
Median	166.65	284.09	140.671	310.71	227.957	236.729	169.068	283.539	345.602	337.58	377.803	161.75	159.593	103.027	118.468	163.437	141.5	139.469	197.453	250.15	234.946	339	217.696	112.81	99.9692	112.862	248.67	102.984
	Fig4t	Fig4t	Fig4t	Fig4t	Fig4t	Fig4t	Fig4t	Fig4t	Fig4t	Fig4t	Fig4t	Fig4t	Fig4t	Fig4t	Fig4t	Fig4t	Fig4t	Fig4t	Fig4t	Fig4t	Fig4t	Fig4t	Fig4t	Fig4t	Fig4t	Fig4t	Fig4t	Fig4t
	acta	acta	acta	acta	acta	acta	acta	acta	acta MO	acta MO	acta MO	acta MO	acta MO	mRH	mRH	mRH	mRH	mRH	mRH acta	mRH acta	mRH acta	mRH acta	mRH acta	Noinj	Noinj	Noinj	Noinj	Noinj
	20200303.psmad2.Aub.acta.1.255.calibrated - Copy_[ims1_2020-04-02T11-55-08.058].xls	20200303.psmad2.Aub.acta.1.547.calibrated - Copy_[ims1_2020-04-02T11-55-08.058].xls	20200303.psmad2.Aub.acta.2.312.calibrated - Copy_[ims1_2020-04-02T11-55-08.058].xls	20200303.psmad2.Aub.acta.2.603.calibrated - Copy_[ims1_2020-04-02T11-55-08.058].xls	20200303.psmad2.Aub.acta.3.328.calibrated - Copy_[ims1_2020-04-02T11-55-08.058].xls	20200303.psmad2.Aub.acta.3.615.calibrated - Copy_[ims1_2020-04-02T11-55-08.058].xls	20200303.psmad2.Aub.acta.4.343.calibrated - Copy_[ims1_2020-04-02T11-55-08.058].xls	20200303.psmad2.Aub.acta.4.642.calibrated - Copy_[ims1_2020-04-02T11-55-08.058].xls	20200303.psmad2.Aub.8MO.acta.1.403.calibrated - Copy_[ims1_2020-04-02T11-55-11.559].xls	20200303.psmad2.Aub.8MO.acta.2.434.calibrated - Copy_[ims1_2020-04-02T11-55-11.559].xls	20200303.psmad2.Aub.8MO.acta.3.449.calibrated - Copy_[ims1_2020-04-02T11-55-11.559].xls	20200308.psmad2.AUB.8MO.acta.2.110.calibrated - Copy_[ims1_2020-04-02T11-55-08.058].xls	20200308.psmad2.AUB.8MO.acta.3.128.calibrated - Copy_[ims1_2020-04-02T11-55-08.058].xls	20200303.psmad2.Aub.8MO.mRH.1.521.calibrated - Copy_[ims1_2020-04-02T11-55-13.044].xls	20200303.psmad2.Aub.8MO.mRH.2.545.calibrated - Copy_[ims1_2020-04-02T11-55-13.044].xls	20200308.psmad2.AUB.mRH.8MO.1.1039.calibrated - Copy_[ims1_2020-04-02T11-55-13.044].xls	20200308.psmad2.AUB.mRH.8MO.2.1116 - Copy_[ims1_2020-04-02T11-55-13.044].xls	20200308.psmad2.AUB.mRH.8MO.4.1133.calibrated - Copy_[ims1_2020-04-02T11-55-13.044].xls	20200303.psmad2.Aub.8MO.mRH.acta.1.508.calibrated - Copy_[ims1_2020-04-02T11-55-14.434].xls	20200308.psmad2.AUB.mRH.8MO.acta.1.1153.calibrated - Copy_[ims1_2020-04-02T11-55-14.434].xls	20200308.psmad2.AUB.mRH.8MO.acta.2.1209.calibrated - Copy_[ims1_2020-04-02T11-55-14.434].xls	20200308.psmad2.AUB.mRH.8MO.acta.3.1225.calibrated - Copy_[ims1_2020-04-02T11-55-14.434].xls	20200308.psmad2.AUB.mRH.8MO.acta.4.1238.calibrated - Copy_[ims1_2020-04-02T11-55-14.434].xls	20200303.psmad2.Aub.noinj.1.143.calibrated - Copy_[ims1_2020-04-02T11-55-05.293].xls	20200303.psmad2.Aub.noinj.2.158.calibrated - Copy_[ims1_2020-04-02T11-55-05.293].xls	20200303.psmad2.Aub.noinj.3.220.calibrated - Copy_[ims1_2020-04-02T11-55-05.293].xls	20200303.pSmad2.AUB.noinj.3.801.calibrated - Copy_[ims1_2020-04-02T11-55-05.293].xls	20200303.psmad2.Aub.noinj.4.2356.calibrated - Copy_[ims1_2020-04-02T11-55-05.293].xls
	Fig2b-acta	Fig2b-acta	Fig2b-acta	Fig2b-acta	Fig2b-acta	Fig2b-acta	Fig2b-acta	Fig2b-acta	Fig2b-acta MO	Fig2b-acta MO	Fig2b-acta MO	Fig2b-acta MO	Fig2b-acta MO	Fig2b-mRH	Fig2b-mRH	Fig2b-mRH	Fig2b-mRH	Fig2b-mRH	Fig2b-mRH acta	Fig2b-mRH acta	Fig2b-mRH acta	Fig2b-mRH acta	Fig2b-mRH acta	Fig2b-Noinj	Fig2b-Noinj	Fig2b-Noinj	Fig2b-Noinj	Fig2b-Noinj
	124.653	288.232	128.444	422.015	169.101	112.02	136.493	414.942	295.013	371.719	73.2051	194.456	10.4167	108.081	102.948	291	120.87	30.6486	41.4138	256.25	186.71	391.672	462.887	123.106	106.05	105.3	223.725	92.1351
	194.295	327.944	99.7183	380.089	175.622	135.309	159.804	406.579	348.871	345.418	31.1	151.513	66.5316	89.2464	116.1	194.714	192.462	93.5614	179.97	234.419	171.426	358.423	441	124.357	103.91	122.091	250.262	99.2542
	139.643	286.764	139.985	406.482	155.934	94.4474	193.128	398.536	251.247	292.485	189.045	167.57	168.136	96.5072	97.2368	144.468	566.451	91.2	203.493	211.024	199.118	294.421	401.803	143.679	106.186	126.535	197.286	94.3281
	116.549	305.983	108.966	430.5	31.2059	155.413	118.946	368.167	331.221	287.797	221.286	156.013	150.877	119.988	98.8816	125.894	202.093	188.658	247.412	210.983	1173.09	498.527	515.574	126.486	116.539	134.052	242.405	105.164
	160.367	293.448	133.405	371.203	159.935	126.385	104.824	533.45	261.585	293.016	247.203	172.549	141.747	120.324	119.186	185.391	343.409	167.145	262.675	228.392	161.292	654.065	453.6	159.627	82.9868	125.25	198.085	92.0395
	135.054	280.433	127.866	347.632	195.845	138.787	116.039	467.529	320.757	106.264	204.545	147.468	39.3125	103.942	104.395	167.018	321.514	179.532	214.103	221.603	197.404	368.125	436	112.526	106.05	467.186	193.883	96.6933
	98.9565	297.894	114.895	403.964	36.7662	194.875	99.1282	473.118	233.256	314.868	226.234	153.378	154.794	102.125	89.8974	205.466	375.392	191.453	177.417	159.667	128.167	447.925	428.575	123.426	108.405	460.13	217.767	91.7342
	124.449	304.671	124.153	401.026	45.1613	166.949	231.295	334.667	337.366	289.239	156.386	48.5405	156.908	106.101	119.508	180.77	300.932	91.96	279.772	230.314	116.129	322.361	519.514	96.4576	104.548	322.446	214.027	88.3378
	173.293	347.357	132.934	305.267	103.14	463.017	94.1266	450.141	259.746	354.586	247.308	176.343	170.621	108.787	128.316	319.071	407.043	107.803	250.595	247.059	218.207	258	444.411	117.296	122.186	102.769	251.828	99.0429
	130.618	361.983	119.013	389.046	105.778	155.731	106.734	473.95	347.273	392.945	277.441	159.312	182.538	107.013	139.284	212.919	315.085	161.476	220.8	141.615	87.1905	265.658	405.307	108.756	105.35	136.8	229.269	86
	170.397	468.932	131.564	324.519	86.4868	118.839	79.1053	419.357	254.943	302.1	209.394	136.085	150.985	121.703	102.43	253.817	279.741	182.528	263.924	167.471	210.784	275.437	450.264	102.118	115.395	127.027	232.031	90.169
	119.276	369.938	108.189	360.606	72	176.676	126.066	388.279	102.721	178.925	182.526	176.683	154.483	108.522	148.836	349.41	374.677	463.507	139.538	223.887	237.286	292.061	716.627	409.846	123.667	132.595	265.656	97.4603
	128.509	306.403	111.276	371.45	98.6786	122.652	235.539	409.137	315.727	305.582	265.547	171.328	164.622	101.566	99.8421	252.85	237.387	149.348	251.525	220.149	203.675	381.233	658.526	159.885	99.2857	674.695	236.842	89.7067
	118.855	395.439	112.583	325.898	118.9	175.526	200.031	492.643	260.724	339.64	196	162.302	88.0794	100.282	121.073	236.54	278.246	379.833	234.75	199.474	103.984	339.912	620.281	119.457	116.672	142.271	245.328	98.1884
	132.654	311.846	124.161	353.091	121.455	140.246	170.196	469.278	562.443	279.2	268.044	175.364	155.247	113.162	108.352	275.462	269.961	412.143	328.19	200.456	209.813	451.156	460.62	101.338	110.678	111.569	215.814	105.857
	137.053	306.449	239.227	318.026	116.456	144.081	388.711	503.234	398.086	163.893	259.351	153.435	150.571	123.566	124.284	287.931	251.658	427	160.536	183.225	192.066	346.467	800.136	125.459	94.0385	127.137	214.125	105.859
	124.638	314.411	84.9661	327.873	152.479	236.697	144.083	444.667	348.107	289.517	186.222	167.642	162.018	97.6833	131	312.803	271.322	319.206	167.243	217	207.4	374.481	770.256	133.627	100.956	116.978	192.904	118.808
	117.579	350.667	102.079	431.311	179.397	392	238.671	428.789	532.855	206.153	307.154	189.581	145.987	127.333	127.966	307.811	254.342	388.013	194.232	184.311	210.507	250.087	390.708	105.287	100.569	133.475	261.985	100.779
	77.0645	368.986	166.127	367.268	183.571	318.456	314.82	387.459	498.017	234.098	293.947	169.237	166.851	92.6176	111.048	160.276	275.915	292.157	156.818	211.42	96.7308	354.427	587.056	287.56	93.9722	125.776	254.576	118.083
	123.141	327.847	97.7538	373.017	203.815	375.293	266.191	343.656	448.458	229.169	254.172	180.315	157.842	109.897	88.4795	353.431	229.732	337.571	266.5	135.138	195.342	320.385	443.946	109.081	94.4625	132.478	266.155	102.105
	140.18	344.697	151.508	378.113	138	338.724	294.524	308.971	597.083	155.592	310.441	56.6875	160.603	100.354	142.586	331.351	294.108	210.543	224.5	265.787	92.5469	266	656.944	95.2388	89.6111	96.1552	305.873	94.0625
	117.813	357.803	96.4091	374.403	116.026	348.577	98.7463	306.565	477.722	166.367	248.536	161.177	166.232	102.525	117.078	295.127	256.16	333.382	271.517	257.628	156.274	357.649	275.236	95.4605	95.1471	116.165	193.987	106.171
	98.4091	392.717	42.0909	329.1	127.773	327.096	287.342	399.548	393.688	293.675	229.232	150.548	169.595	83.6	136.305	212.269	222.937	73.4423	155.382	238.047	186.294	385.568	436.052	113.566	109.333	120.106	219.368	103.96
	127.909	370.586	148.768	386.423	137.381	365.563	135.969	498.449	360.9	291.9	230.291	171.117	170.063	57.2564	104.914	240.643	254.088	53.4722	233.787	220.873	113.729	334.818	441.096	114.476	116.181	104.239	239.746	113.103
	162.91	333.104	145.212	374.333	133.687	128.595	197.949	416.5	445.507	281.149	234.917	160.353	169.657	122.469	131.75	271.915	268.486	77.9531	217	211.526	228.565	323.444	435.294	104.264	96.3288	690.076	284.883	100.179
	151.23	304.392	112.091	352.183	340.236	323.544	231.169	463.736	480.125	254.912	203.215	144.264	156.759	100.256	126.672	206.725	84.1607	55.0345	216.351	244.444	212.933	336.262	400.068	100.691	131.014	105.089	215.556	117.773
	194.344	309.026	121.156	382.567	562.273	162.259	233.294	389.753	558.029	221.171	258.408	167.513	160.446	76	98.4714	237.328	135.143	96.2029	221.15	161.935	236.304	266.303	403.377	121.3	100.848	339.431	249.171	109.026
	126.676	305.81	92.5063	307.91	158.028	412.394	217.81	407.203	511.621	134.368	307.582	161.972	163.044	95.1159	93.9667	393.425	101.075	59.6825	155.158	233.118	210.534	338.783	369.159	130.305	106.933	275.085	195.052	91.2281
	138.575	279.013	129.508	385.477	122.582	464.807	230.873	392.229	532.049	274.686	170.089	158.607	153.904	99.1467	112.639	278.727	189.655	53.7656	192.211	247.545	261.661	314.182	434.042	192.125	104.369	420.763	262.421	111.868
	126.104	305.375	139.868	284.22	129.921	448.311	228.311	435.278	853.549	328.436	196.938	142.157	175.783	85.7742	108.667	268.913	122.339	144.614	255.613	245.987	208.581	288.304	407.269	125.882	100.353	222.643	236.477	110.368
	125.338	261.145	129.413	374.139	156.236	302.311	231	466.779	385.742	309.468	192.175	161.859	136.143	122.215	138.113	254.407	84.0154	157.568	201.747	235.797	199.117	209.435	384.797	250.68	112.286	260.551	288.571	88.7922
	115.938	274.763	125.474	330.421	143.216	393.271	244.077	416.85	341.309	91.9863	284.23	150.047	162.167	109.617	133.862	331.351	203.867	170.722	179.903	221.636	232.387	293.649	386.9	128.571	108.627	352.757	267	124.431
	141.036	240.635	136.881	307.956	132.071	344.134	252.691	479	631.11	217.408	182.718	166.109	171.013	102.861	98.0972	248.215	106.943	155.466	213.543	236	234.143	281.097	385.507	260.695	107.375	321.278	210.759	99.6812
	142.614	298.298	124.282	316.342	163.127	334.304	303.723	443.013	523.423	274.574	297.217	152.721	166.821	102.267	102.862	224.382	492.519	97.5526	245.033	246.857	201.875	340.559	393.218	265.133	110.889	487.618	263.224	94.0278
	112.959	301.338	115.953	313.535	192.508	282.361	270.633	451.107	350.273	307.662	212.043	161.735	108.24	104.8	108.759	296.452	145.054	91.5	247.857	204.281	298.289	239.224	401.91	200.098	120.65	264.092	249.375	76.6351
	135.845	325.891	144.897	377.246	127.38	319.431	216.788	426.436	390.369	120.246	249.532	174.925	156.178	113.81	141.036	314.936	165.365	157.641	242.161	260.065	209.591	339.742	373.724	217.8	93.3684	289.885	234.027	116.18
	108.963	312.632	99.5429	263.379	143.5	351.41	237.203	412.869	424.566	236.016	206.638	162.581	160.441	95.5195	89.1772	271.155	377.328	395.487	260.56	215.77	235.2	362.61	434.839	145.882	114.367	206.582	258.38	118.6
	142.833	339.782	124.833	345.28	154.982	456.946	304.373	577.869	377.038	267.2	267.65	163.62	166.9	104.703	104.308	232.167	308.532	294.97	237.1	236.603	137.649	423.785	405.903	124.205	118.288	261.982	254.524	105.19
	115.42	253.862	117.918	264.235	36.5469	347.356	244.974	448.8	523.254	279.013	241.073	176.323	165.59	104.667	122.6	312.724	132.273	163.684	260.803	246.973	64.7368	299.868	460.829	99.7973	136.807	131.4	226.026	114.47
	133.5	302.224	135.267	401.847	149.115	348.962	169.051	439.545	651.444	262.471	224.268	176.986	166.732	95.1343	130.651	283.015	147.311	255.843	233.652	192.324	197.358	322.213	463.169	114.631	103.613	201.655	229.909	86.8548
	131.101	287.632	111.823	266.819	89.5846	349.621	135.038	368.826	553.197	311.275	229.662	179.091	174.522	94.127	101.083	352.55	384.595	59.5	253.831	244.5	171.308	373.847	389.815	121.266	127.39	195.143	261.789	93.7869
	174.42	271.611	149.696	281.616	100.014	447.794	114.582	561.915	357.574	292.974	308.769	164.776	179.641	119.661	91.2154	281.523	152.305	198.317	163.158	202.298	213.677	349.656	316.767	118.422	110.733	260.337	241.167	110.13
	173.868	311.767	141.754	306.051	95.7679	285.227	89.3571	426.474	457.727	190.167	242.82	162.118	190.414	107.464	117.705	175.966	147.672	164.15	296.385	208.954	214.647	437.655	489.769	141.444	102.286	380.63	265.233	68.3875
	197.304	279.531	148.493	375.653	103.866	434.667	101.585	293.987	417.25	218.873	261.338	175.45	160.313	78.8182	118.725	314.028	303.2	155.817	206.59	225.478	216.188	306.962	430.176	118.236	95.1918	297.053	291.554	92.1228
	211.136	292.217	124.329	267.375	82.8472	343.108	98.4098	415.359	400.176	307.475	259.312	147.597	175.065	106.478	110.205	270.35	148.136	189.014	206.662	202.5	93.0833	314.434	371.792	223.684	117.182	126.125	284.063	85.661
	117.067	283.71	121.764	292.825	77.4521	323.117	107.477	341.525	384.636	288.493	251	158.386	167.644	113.449	106.565	239.947	416.067	182.224	219.203	257.596	196.745	219.573	488.372	296.221	102.515	353.485	268.813	101.763
	121.045	305.577	123.706	299.672	112.667	455.246	83.5211	423.227	333	349.441	208.653	151.385	150.409	116.623	100.771	255.658	168.849	198.28	236.462	231.705	196.661	397.207	455.654	244.214	117.222	271.677	295.239	94.8143
	180.802	308.315	139.363	311.853	85.125	358.597	106.358	445.761	352.733	382.413	276.865	182.803	161.643	111.55	111.039	238.221	159.515	149.646	222.468	274.974	199.119	375.31	548.507	301.38	98	243.123	338.443	92.8642
	189.6	293.768	124.86	309.683	93.6316	349.875	141.438	515.947	382.286	364.419	287.786	149.667	144.942	102.419	107.316	309.348	261.781	140.356	273.493	264.875	208.382	231.712	275.015	302.263	125.182	235.507	213.729	83.7013
	118.868	317.595	134.235	344.805	122.563	80.8734	293.579	339	416.79	286.101	153.411	171.307	149.125	103.027	102.919	283.083	333.386	184.901	215.018	254.528	221.972	335.847	622.862	138.161	105.222	283.274	241.321	99.6104
	149.414	298.513	142.206	349.564	141.689	344.646	135.026	441.218	427.5	295.875	146.42	152.813	151.969	101.443	94.525	252.536	267.75	120.658	339.333	264.597	189.831	273.286	385.196	287.472	80.303	367.5	242.3	94.2632
	94.1014	260.458	106.088	328.806	78.5395	344.071	142.14	411.379	173.286	343.906	294.426	180.343	201.043	109.6	113.108	226.271	154.805	179.467	204.849	227.339	193.474	344.586	274.27	249.197	110.985	166.453	205.267	101.844
	90	276.048	104.269	280.831	89.4762	337.77	125.493	393.836	177.915	129.039	353.933	174.493	165.848	135.569	113	330.71	292.339	40.7015	226.678	264.161	225.68	261.309	408.034	272.485	91.7564	266.244	222.358	106.409
	127.633	278.392	114.897	327.129	168.035	484.222	181.078	454.849	248.478	250	261.262	133.474	185.524	94.2083	123.091	206.406	325.167	48.2857	163.987	231.743	194.462	249.366	383.458	267.654	109.468	258.5	255.2	104.169
	101.576	256.263	96	345.731	92.5769	505.821	182.175	521.269	211.373	240.356	243.176	174.75	170.661	114.785	131.721	270.069	246.362	153.432	217.676	202.164	153.517	376.88	441.615	229.015	109.273	372.207	294.313	99.9855
	111.819	261.946	238.548	351.697	172.524	282.946	85.8194	415.929	409.152	278.164	285.169	175.658	162.189	104.729	124.152	252.239	265.35	161.768	278.699	221.886	217.507	336.776	405.618	230.051	101.517	151.615	276.574	105.824
	129.542	318.855	209.25	304.214	119.615	318.922	207.162	395	322.377	282.594	249.295	149.197	163.872	102.713	115.985	287.936	343.38	145.486	226.58	213.552	220.808	405.574	725.246	117.971	109.051	229.956	256.744	102.647
	117.308	295.754	113.794	501.532	144.931	265.75	175.696	346.481	355.938	377.127	223.269	163.222	148.275	108.712	117.693	285.528	291.304	136.864	283.561	212.615	195.641	368.371	476.26	138.491	88.2763	200.19	253.038	105.102
	174.653	345.395	133.031	204.778	138.524	79.9057	93.3385	371.849	370.6	365.354	226.347	179.268	175.892	93.5	134.615	279.589	295.051	282.213	259.333	243.421	185.013	296.71	420.182	102.569	108	201.026	295.275	106.486
	106.204	400.366	103.662	262.94	138.169	107.314	104.052	483.148	265.783	339.067	328.179	160.638	191.481	81.6795	110.359	254.441	237.453	147.753	226.103	210.441	199.103	345.034	327.103	106.561	87.8571	245.361	283.744	89.0469
	209.455	310.477	178.306	229.718	91.4868	119.611	115.468	379.684	308.5	297.921	267.526	169.25	170.025	120.27	113.987	229.087	299.26	153.582	210.132	226.537	243.244	274.286	289.588	105.227	99.8481	445.787	255.385	80.7162
	154.907	471.603	103.774	300.784	111.364	150.944	101.19	401.269	287.303	213.514	220.107	176	146.672	112.425	142.97	261.3	368.419	87.3188	182.338	434.423	242.761	281.278	369.693	154.191	98.8116	301.576	276.853	98.4615
	170.938	425.026	134.464	250.359	130.174	166.943	188.375	383.217	288.806	434.292	284.878	126.741	160.034	114.031	119.625	226.767	255.628	179.256	184.019	167.471	189.089	217.117	295.333	187.066	125.644	122.024	293.635	96.5373
	194.203	350.646	119.87	267.288	159.066	144.315	210.692	417.328	303.826	315.833	290.892	153.026	136.87	99.4167	112.478	320.897	270.143	191.944	214.243	309.134	95.6487	249.057	421.494	147.603	113.316	128.314	250	100.611
	132.69	325.359	129.426	323.786	128.028	153.091	170	311.538	235.25	431.775	243.896	156.449	135.681	101.517	128.831	247.269	291.486	198.986	207.319	440.71	204.351	271.929	382.432	123.35	88.4559	121.875	276.641	77.8718
	141.712	405.059	186.415	323.714	138.515	86.15	197.186	401.324	356.524	277.652	46.4848	169.457	155.512	104.691	125.271	250.542	223.464	173.603	256.049	182.859	193.912	274.19	480.073	119.523	106.868	119.526	229.941	101.5
	152.393	336.317	125.766	407.419	81.1389	93.9655	181.743	400.289	272.382	330.464	294.949	175.721	155.686	106.908	98.4722	241.726	240.922	199.189	233.671	204.422	174.029	255.537	742.605	115.271	113.409	99.1389	47.3289	102.667
	122.938	327.861	129.561	390.413	139.809	142.254	111.043	397.481	261.234	370.029	244.831	165.259	151.863	116.891	149.614	199.13	74.8039	188.618	249.457	172.314	190.621	289	403.915	152.615	102.197	100.269	266.646	78.8852
	148.932	317.788	138.549	263.714	87.4487	198.379	173.016	305.324	310.194	209.792	297.172	159.557	145.343	108.013	116.86	141.118	71.6029	193.581	230.552	256.544	193.338	294.886	601.111	111.529	121.713	325.667	264.015	112.787
	143.47	307.974	122.763	291.762	76.8082	79.9861	115.831	439.343	381.914	292.224	255.234	135.013	156.032	83.4923	122.319	176.261	73.5526	336.638	232.722	252.776	172.386	293.456	340.441	110.932	112.868	259.897	243.791	105.27
	114.75	290.987	117.179	399.111	104.584	94.8806	153.337	404.688	326.6	288.939	217.637	183.441	184.523	102.433	113.613	95.7162	82.6571	461.017	290.081	245.041	180.328	306.982	461.491	126.893	84.8676	240.583	253.034	98.6727
	78.069	399.016	116.96	299.197	107.378	197.547	183.464	415.509	323.507	347.25	170.486	201.714	143.845	119.915	106.91	157.493	76.7465	154.316	227.211	312.595	184.128	254.132	492.439	156.246	110.579	278.378	310.185	126.723
	120.581	355.638	114.387	337.817	49.8333	109.115	169.531	452.439	333.967	215.667	279.773	148.81	185.295	112.194	118.433	133.433	91.1897	173.154	282.565	183.347	192.347	350.967	448.015	164.517	111.603	375.058	314.544	99.3188
	148.708	439.031	135.839	242.622	91.7895	183.772	159.831	407.388	276.463	181.439	291.597	185.018	145.694	101.78	121.014	179.633	76.6716	300.667	235.658	240.721	195.275	326.513	599.051	111.987	120	369.877	267.53	113.357
	119.76	632.316	109.355	329.78	146.171	120.425	204.881	369.543	331.43	442.103	309.612	168.853	152.746	107.818	126	319.913	167.086	314.849	203.6	275.585	203.221	373.531	518.939	137.434	100.605	218.886	280.043	112.91
	135.186	276.583	112.914	321.526	112.776	188.051	277.912	405.127	308.646	355.615	143.175	183.367	152.441	128.406	113.566	187.345	139.015	254.239	166.721	264.8	174.243	320.297	422.904	117.304	99.5873	161.986	299.862	103.123
	148.395	281.041	117.359	287.236	145.862	191.356	180.423	333.765	261.754	444.351	301.211	172.485	162.959	80.2899	129.508	129.12	63.2241	251.564	245.077	229.372	208.236	271.53	346.171	144.613	113.23	333.013	232.143	94.3824
	161.369	319.526	144.94	303.764	130.402	128.288	195.961	457.579	379.449	325.607	252.418	155.843	170.224	101.547	116.258	95.9296	143.472	269.149	231.338	241.679	133.632	307.175	459.438	101.734	101	466.556	277.558	111.4
	150.872	571.951	100.678	375.857	169.138	145.276	335.732	465.955	362.623	311.281	423.677	180.091	172.508	102.184	122.397	361.648	179.785	328.042	264.576	275.449	219.326	292.959	395.215	141.247	90.4118	252.813	170.017	108.318
	122.603	274.87	116.912	285.909	71.0222	196.931	189.728	394.069	369.466	365.804	285.869	167.754	161.878	115.638	109.542	260.716	155.64	298.9	203.377	409.353	94.5606	297.871	448.47	152.838	119.753	254.321	168.714	123.147
	140.614	635.089	97.5062	254.078	147.643	180.903	150.974	428.879	361.303	360.766	249.494	173.372	150.373	90.5079	115.017	297.197	292.567	262.475	206.041	248.672	204	319.864	398.895	480.609	108.219	548.033	235.162	93.4744
	145.873	311.893	144.971	301.696	137.108	85.3016	166.525	437.862	277.623	318.159	290.966	153.803	173.361	97.7237	112.938	167.355	266.426	249.233	224.393	274.622	194.481	318.671	583.538	203.328	92.6081	247.797	216.877	89.2763
	156.328	321.12	91.1014	390.509	117.368	188.528	210.092	407.746	312.288	302.239	204.301	170.808	158.661	107.278	98.7231	448.531	314.099	294.879	199.421	220.453	190.593	328.443	435.146	150.595	88.4154	531.519	239.571	108.649
	130.354	280.167	109.605	440.179	120.639	171.681	167.059	395.57	335.833	249.766	334.085	177.792	178.794	99.9125	110.836	379.456	161.453	304.456	232.016	343.531	176.293	255.911	346.782	316.532	118.103	348.767	223.944	98.1351
	173.839	335.431	118.211	300.564	116.474	218.582	211.671	568.605	469.337	212.338	307.227	170.873	180.492	85.75	121.897	279.919	284.388	224.095	202.877	236.268	126.767	366.29	386.457	367.677	106.194	277.224	249.643	116.297
	124.608	434.938	121.737	287.048	142.661	108.96	187.895	354.138	354.25	313.808	265.237	139.544	157.5	111.338	107.738	139.25	200.793	290.708	220.404	329.351	183.434	351.982	371.044	275.278	106.25	208.855	240.804	108.395
	186.383	290.279	113.833	380.389	119.812	179.29	204.614	561.053	359.568	296.646	337.577	151.442	189.028	87.7848	111.286	311.757	361.11	263.816	211.909	291.125	214.365	309.544	420.615	233.129	112.132	98.1379	234.368	84.8312
	124.026	331.474	107.717	277.375	93.7705	173.941	166.464	449.427	299.528	268.603	254.922	174.718	178.574	85.6282	112.304	300.457	142.358	270.343	231.391	245.615	182.724	270.114	628.696	211.773	113.695	114.706	214.063	90.3896
	107.317	530.267	118.851	269.425	135.7	100.65	188.148	403.519	360.146	199.42	296.054	161.212	185.792	92.7794	92.5538	285.852	289.288	267.368	222.849	270.212	207.034	249.016	462.945	247.682	116.559	106.039	234.547	101.538
	137.746	336.118	105.965	248.218	109.988	175.2	149.095	401.621	385.685	272.75	242.051	187.309	175.114	87.0588	118.417	73.3846	235.196	145.354	249.937	258.105	212.878	251.258	458.808	195.684	110.873	109.286	228.783	103.418
	154.875	252.931	113.135	269.064	136.283	479.338	212.464	443.154	294.987	154.411	290.857	203.559	176.743	87.8448	132.158	180.926	210.8	261.568	229.346	243.655	107.237	300.11	647.294	139.782	121.949	360.065	220.587	117.304
	172	305.078	125.177	273.63	117.526	178.138	178.536	452.127	318.31	283.683	238.474	154.6	174.676	103.155	87.0732	253.027	255.84	173.347	200.55	260.116	194.982	391.59	388.45	179.05	108.358	223.875	264.075	87.9744
	111.414	369.361	118.046	324.373	151.269	204.824	183.623	521.25	343.239	240.831	225.9	160.684	177.986	67.7419	102.769	218.588	85.3231	271.875	294.924	276.696	192.741	363.183	503.632	268.064	109.298	125.35	248.646	77.4727
	107.232	333.268	95.0317	256.474	124.493	69.459	159.303	451.015	346.195	256.113	404.735	175.694	177.514	87	116.776	422.177	82.9552	217	189.875	244.725	195.889	265.481	564.088	213.472	114.205	229.316	209.967	121.724
	134.2	311.441	115.145	286.847	129.632	178.258	201.301	459.475	298.628	229.803	272.538	168.279	139.256	128.309	124	280.229	83.0303	340.03	262.073	236.421	102.359	342.351	502.013	216.879	111.143	276.528	269.268	102.152
	64.5217	511.831	263.6	285.987	150.54	131.383	151.507	465.661	365.276	258.857	353.71	182.136	186.667	121.783	119.797	276.932	58.0308	249.295	217.95	216.461	86.1803	377.603	436.684	302.911	128.333	183.769	261.59	101.232
	147.918	436.328	107	249.595	125.508	129.088	149.197	474.379	570.69	312.242	465.117	190.417	184.863	96.3973	119.24	237.486	64.0548	135.964	163.941	285.224	92.1333	286.957	445.579	128.377	113.526	97.3088	243.228	114.9
	149.039	494.636	122.586	355.054	106.25	387.151	150.962	315.722	325.821	270.662	257.443	166.515	172.394	114.985	121.517	264.444	108.707	110.417	241.662	210.975	67.1515	317.699	376.107	478.224	77.6494	43.2143	240.756	89.8442
	112.871	128.823	130.025	224.324	106.76	406.233	165.267	377.247	359.386	350.618	156.949	164.192	189.829	129.588	142.569	275.786	76.3793	91.2597	214.306	255.533	114.839	291.975	426.207	142.677	105.149	111.45	243.119	114.986
	131.839	324.391	137.052	249.461	146.525	150.082	191.137	428.75	385.515	346.267	307.8	159.158	175.015	96.7639	128.635	249.216	158.097	63.2373	232.857	202.102	152.111	300.625	432.768	137.985	96.8421	106.765	261.515	111.467
	102.947	259.354	130.928	266.562	155.962	355.115	137.165	541.797	294.843	350.534	231.833	159.962	159.443	97.7321	135.211	257.45	208.133	111.316	239.962	233.957	90.1509	360.623	311.654	115.571	111.961	112.934	166.97	117.739
	93.0938	255.73	137.683	270.066	129.481	382.217	131.429	434.753	358.797	247.333	114.357	141.797	166.975	111.42	120.14	264.1	89.2857	159.132	257.071	231.526	96.1132	328.42	222.667	124.076	133.577	114.152	233.152	105.723
	132.111	282.986	121.894	295.421	113.313	198.297	131.408	500.806	284.862	250.078	143.541	157.901	177.215	95.2105	106.125	229.431	67.9333	153.567	224.795	225.261	109.759	276.662	474.281	131.849	107.719	243.921	245.924	93.8235
	178.306	294.794	141.086	431.608	136.977	137.043	196.431	453.609	286.015	236.667	197.026	152.093	169.063	121.143	121.608	276.246	154.132	154.76	245.462	237.704	133.353	302.566	355.108	286.729	114.474	122.092	246.986	101.342
	121.544	287.356	136.043	273.333	108.883	67.5	160.859	395.804	284.051	201.718	161.461	166.688	158.959	94.6232	122	269.093	53.275	411.085	225.515	267.493	80.4156	207.493	402.491	261.857	96.2794	340.559	196.985	101.424
	108.393	282.26	128.182	551.345	143.709	110.243	147.566	321.27	296.507	293.975	354.792	171.033	170.885	124.724	98.3077	311.517	65.8919	320.941	186.063	233.294	102.417	371.817	489.311	134.562	96.5254	284	236.553	75.0253
	211.838	277.132	120.316	639.671	103.068	368.787	116.738	393.403	253.403	231.821	291.436	183.797	180.21	120.486	112.758	224.639	148.064	242.734	190.534	280.4	131.865	330.586	328.966	131.62	120.359	369.513	214.844	92.7015
	186.145	375.703	124.932	704.625	125.514	449.886	140.857	417.25	329.821	203.206	172.642	176.74	193.794	126.641	130.43	243.184	185.949	376.384	206.908	262.167	80.8816	308.469	374.197	122.271	106.589	268.588	250.658	96.0758
	154.605	268.065	129.903	487.722	121.043	69.8909	151.016	511.84	340.75	222.211	261.845	164.266	167.322	94.3288	113.657	271.891	67.6429	293.871	173.719	290.182	103.323	318.582	430.116	168.146	96.1967	185.149	249.864	96.1053
	143.86	307.892	120.806	479.271	116.359	386.513	205.545	421.936	299.368	298.5	185.444	194.696	145.297	112.32	114.576	257.169	518	295.662	155.569	244.87	130.35	416.31	220.283	255.786	98.7662	154.229	256.339	89.5972
	111.543	253.672	101.635	624.375	125.452	381.603	181.851	467.254	306.645	283.229	177.041	188.515	183.123	107.628	106.456	211.054	169.351	259.361	244.785	204.961	109.707	310.648	341.338	166.561	124.645	265.225	264.135	116.974
	128.537	268.456	97.3375	593.908	125.829	306.041	153.125	367.515	292.667	347.012	123.594	181.75	200.192	95.8657	128.066	223.479	147.986	258.813	200.345	285.77	160.773	312.289	304.956	163.131	105.91	212.652	282.932	102
	115.211	417.848	123.028	482.986	86.8421	317.692	212.869	380.615	306.831	254.982	161.195	22.7538	162.526	111.838	102.419	273.899	81.2297	237.291	249.556	319.183	102.971	368.219	319.253	76.45	120.029	402.125	265.564	101.951
	118.389	393.119	134.188	712.373	114.553	313.424	155.944	460.075	289.692	309.221	269.865	157.4	181.926	90.4125	130.114	248.792	389.574	77.74	265.179	179.917	92.5357	344.783	360.47	95.9722	118.605	113.927	225.338	99.6892
	104.221	303	123.373	514.329	112.433	310.288	189.219	376.689	401.028	329.761	256.623	148.971	195.686	94.4744	105.657	221.924	367	45.7813	212.909	207.099	206.773	327.345	299.464	130.848	106.544	190.421	249.773	94.3425
	77.25	276.918	124.871	554.923	115.216	335.706	153.864	468.184	356.083	309.013	291.268	149.05	194.571	118.508	113.915	233.963	309.829	65.2222	264.896	245.972	96.4773	302.582	300.2	277.943	135.031	111.894	292.121	89.5972
	150.304	216.878	138.955	448.781	127.579	301.05	169.701	564.73	283.397	216.136	151.544	174.069	186.301	121.304	113.973	260.474	66.3036	50.1148	156.493	252.945	116.671	314.339	313.847	116.403	104.468	123.131	260.628	98.371
	151.741	238.529	166.667	577.627	98.8936	298.892	159.034	296.413	352.931	111.831	218	137.661	165.076	102.966	98.7013	292.021	69.2676	61.2353	260.652	272.059	222.938	335.087	337.526	216.462	111.185	129.184	234.903	115.578
	100.302	335.382	136.12	545.071	120.836	346.119	197.591	479.397	245.229	347.483	243.887	168.522	166.397	107.053	85.039	233.072	67.8361	61.6857	242.145	201.574	190.564	282.448	282.043	230.721	99.0714	122.93	225.861	117.429
	132.491	278.892	109.145	500.474	123.884	407.313	171.5	389.885	339.429	325.973	271.448	142.597	183.747	121.671	104.254	233.417	148.644	57.1385	234.571	261.109	215.5	312.661	277.645	123.803	92.6	110.827	264.125	116.444
	193.521	279.862	140.867	282.643	106.196	126.397	170.94	472.824	318.456	311	259.397	166.411	196.718	111.61	90.7949	247.492	160.116	174.824	229.6	257.25	210.09	325.05	322.844	111.607	110.74	318.789	250.949	108.824
	104.795	222.556	125.224	489.494	128.625	126.5	168.813	327.057	342.329	292.316	220.167	184.763	203.884	96.2813	80.9429	228.816	159.845	284.038	306.197	268.917	173.972	286.517	303.161	44.403	91.1571	118.571	214.6	96.5769
	120.96	447.946	119.224	485.19	131.438	111.271	207	409.673	361.346	253.781	203.795	154.775	170.045	104.339	132.507	258.803	100.507	171.279	162.8	255.338	225.947	283.695	439.136	107.42	81.2951	236.849	217.522	96.9722
	162.465	322.538	110.692	479.573	99.6515	129.439	254.528	325.903	332.4	315.559	269.603	156.812	169.623	118.61	123.649	270.308	185.055	296.312	206.261	254.222	200.408	379.782	416.231	107.118	101.268	90.1159	298.508	94.9744
	208.671	284.732	136.333	379.563	118.43	308.742	126.418	348.483	310.487	253.947	201.481	174.038	156.59	98.5882	116.052	262.189	176.732	193.79	288.561	250.365	161.254	317.526	301.711	297.26	95.8904	96.6829	259.729	104.449
	186.015	314.353	125.882	613.018	145.125	338.191	134.889	298.485	339.087	304.966	257.37	184.359	171.281	106.438	121	196.656	144.618	229.603	205.765	235.26	188.474	287	439.712	205.232	88.4487	100.131	229.941	92.1333
	243.162	353.757	111.31	631.151	122.684	327.313	130.164	441.416	397.308	292.623	306.065	149.041	170.475	84.3472	110.288	256.732	73	308.899	180.309	224.197	125.5	347.487	503.628	142.258	96.7188	89.7465	229.079	90.4231
	154.351	328.1	121.333	574.959	135.667	350.447	69.5	425.373	317.015	330.614	188.443	152.845	165.825	92.5775	114.769	271.582	84.45	152.167	223.636	231.354	215.381	401.274	480.747	336.821	110.405	353.237	248.862	107.287
	179.64	291.915	159.271	582.328	137.586	277.197	128.087	475.018	313.837	213.708	268.208	203.539	143.288	113.897	119.897	174.107	63.6184	273.982	239.844	227.014	141.029	405.806	397.525	102.833	105.894	183.293	288.918	105.86
	238.325	282.625	121.419	459.556	108.303	325.642	102.7	344.406	332.328	392.827	292.921	186.776	182.657	110.203	109.757	278.419	171.269	137.608	214.051	242.825	216.357	372.317	213.299	97.9697	89.2754	100.595	237.268	95.0769
	96.7727	411.636	116.446	527.839	110.184	442.382	102.881	476.485	407.676	245.347	266.882	162.881	170.473	109.702	127.194	272.182	128.06	254.053	203.781	215	123.017	345.656	518.91	307.779	113.216	593.095	292.194	116.184
	213.728	435.172	117.947	325.541	107.515	343.263	113.492	511.7	377.554	259.055	190.615	146.574	147.182	102.169	106.963	260.688	55.0172	148.594	152.459	227.351	188.754	292.686	429.842	242.089	106.946	199.133	215.131	117.529
	106.46	435.542	119.96	489.136	80.25	463.662	136.732	417.581	250.121	299.531	196.494	173.128	149.918	93.2535	121.902	257.986	145.282	130.475	262.821	225.481	214.333	370.775	482.694	199.053	128.754	344.25	263.16	112.333
	99.1781	288.087	117.61	359.633	116.867	355.467	114.955	534.118	283.746	201.77	273.882	186.7	182.266	97.3875	141.015	255.94	73.961	364.633	179.025	241.372	185.141	338.25	564.461	224.944	99.1447	242.724	269.487	93.9545
	130.386	296.265	99.5897	544.731	127.509	354.909	138.429	360.059	312.4	229.319	225.957	170.025	166.754	101.304	120.224	253.686	324.795	259.123	294.661	210.625	177.395	310.25	183.582	238.831	115.203	229.908	239.09	92.2321
	95.3513	352.507	117.125	542.18	105.123	324.885	155.527	459.655	296.412	130.656	300.013	200.853	181.89	103.292	128.842	275.93	274.246	242.649	228.769	144.844	195.492	339.975	375.423	231.433	98.9444	107.971	252.277	119.549
	110.794	296.672	32.274	527.375	116.269	296.041	145.298	488.716	315.854	181.862	170.421	165.189	169.784	101.536	143.821	250.037	252.942	261.256	256.172	246.862	193.176	347	587.19	260.24	120.721	30.5	248.594	85.1538
	119.545	360.028	47.85	530.737	125.275	109.34	131.074	418.241	455.446	249.975	241.118	173.364	182.028	103.277	134.53	349.671	329.13	298.206	274.451	242.283	369.559	319.455	418.946	313.954	90.662	92.275	262.188	111.219
	102.16	376.723	76.2545	424.032	118.029	116.648	130.741	513.823	322.688	288.014	188.196	171.276	207.493	113	140.594	258.346	249.937	73.9245	238.964	452.507	279.159	334.542	461.123	158.654	117.191	44.9667	233.299	98.9265
	153.964	249.31	160.733	584.884	114.4	85.8868	121.508	503.461	345.542	208.432	283.333	170.662	188.373	107.692	123.816	202.333	229.167	55.98	274.069	444.036	196.426	348.368	538.591	245.027	118.385	91.3797	283.661	89.8545
	119.06	285.403	81.1321	387.2	113.724	82.9333	127.281	552.987	181.372	156.361	316.042	140.557	189.605	104.789	113	263.737	237.987	42.971	257	198.675	77.3273	361.222	495.195	258.567	108.898	110.027	293.103	107.625
	130.643	389.782	113.236	417.295	97.9836	50.0857	93.2375	385.875	317.917	203.264	304.227	158.653	173.209	76.0702	120.309	231.629	271.141	66.3231	250.367	294.015	80.2609	400.609	389.253	232.31	106.327	114.243	235.072	102.7
	109.731	313.724	120.685	259.975	38.9873	73.8	136.167	373.884	307.908	335.767	283.242	163.609	177.844	106.286	95.4167	260.288	245.203	42.6282	252.772	357.446	88.5797	286.769	400.467	300.671	99.5667	107.908	274.25	93.2941
	134.098	335.387	133.656	348.194	113.25	105.382	143.305	459.354	248.878	283.275	196.893	160.016	172.886	99.1772	119.75	245.446	252.316	72.4744	237.494	373.521	140.741	328.243	594.845	349.305	113.417	198.527	261.942	89.6
	129.958	322.947	125.027	351.015	93.2571	94.5846	142.08	345.735	374.89	258.466	316.984	190.464	143.735	119.161	197.131	254.917	265.354	54.4559	247.19	222.063	49.4915	337.086	459.711	186.853	111.855	114.434	271.986	93.5455
	118.8	328.943	140.452	356.567	79.5	111.051	150.116	409	423.6	166.915	325.324	170.114	135.118	98.8667	109.492	204.625	281.082	89	260.863	190.987	46.5256	341.339	317.413	228.347	98.0137	117.092	230.083	108.589
	337.212	340.847	133.552	301.905	197.881	102.789	148.969	441.722	482.585	200.125	349.68	144.569	174.394	77.5479	315.971	208.03	253.962	46.2394	214.188	377.296	101.281	379.194	437.25	121.739	92.7167	135.75	274.122	97.507
	234.62	310.625	112.257	347.052	71.9302	92.0519	132.824	309.203	560.066	299.4	245.897	174.145	153.671	104.397	138.868	196.949	251.483	51.1786	173.35	291.532	140.267	327.314	364.573	249.831	105.213	149.974	298.875	107.871
	125.365	273.121	144.25	235.7	117.613	110.433	133.377	503.176	252.057	329.974	222.317	166.866	155.073	107.088	85.6301	228.987	174.188	73.7215	241.509	258.392	111.417	344.577	323.133	111.067	107.716	107.042	288.156	107.69
	355.266	301.861	142.13	368.121	130.085	84.1304	156.23	368.484	288.841	280.649	226.358	181.253	197.435	112.081	112.162	298.776	178.295	44.6724	235.359	314.25	206.717	264.658	318.117	234.803	99.0781	123.833	235.461	112.885
	495.852	280.333	91.6883	349.475	170.731	70.875	140.273	461.231	362.972	292.262	239.051	200.2	155.179	102.23	498.018	247	160.667	66.1667	159.8	319.048	218.824	343.153	368.153	239.712	85.3692	93.1857	268.522	103.25
	282.246	276.329	115.953	319.781	150.025	124.797	134.851	368.948	579.127	329.516	278.736	7.74359	144.013	108.395	137.88	226.816	127.179	97.4754	177.75	293.773	129.236	288.385	432.333	292.692	113	134.639	270.561	99.7826
	223.88	456.137	110.438	276.45	147.875	87.7792	140.304	437.571	515.844	236.045	337.017	195.506	157.403	91.1948	84.2456	200.922	146.474	47.7101	279.731	394.792	124.952	381.327	461.746	174.316	96.5395	124.522	248.829	88.0278
	265.824	267.986	145.567	384.875	139.121	133.016	157.308	313.705	425.971	184.19	219.456	192.885	168.625	103.734	94.3429	262.671	138.459	37.55	233.862	277.635	162.364	270.087	370.885	227.625	102.886	231.945	273.756	105.107
	438.712	359.721	130.679	266.211	130.731	66.9688	227.932	434.671	450.506	307.443	270.654	175.934	156.333	105.247	107.017	264.333	131.677	51.5091	142.464	339.462	174.197	174.284	434.228	131.744	127.986	219.885	289.632	114.474
	271.5	313.667	133.704	328.125	143.362	125.394	142.697	435.25	329.893	135.207	213.662	106.964	51.8889	100.625	117.065	236.544	102.848	38.9245	180.5	301.493	205.689	308.714	432.473	220.889	106.753	356.547	261.099	99.9412
	212.722	360.079	111.646	286.185	151.516	96.9474	158.316	446.569	263.055	279.824	278.064	159.486	187.303	109.25	86.4667	247.786	121.041	56.3175	173.074	285.224	136.63	353.143	375.696	43.0635	112.636	228.667	226.158	102.231
	384.958	305.987	145	342.596	107.821	84.3939	150.776	339.879	185.027	260.483	169.85	171.176	149.477	102.526	89.2361	314.887	177.983	40.0857	210.946	221.667	164.539	376.869	327.286	120.6	99.7846	384.059	261.049	110.288
	498.091	315.679	123.5	251.556	69.0488	73.5	151.938	426.151	133.911	230.516	286.783	150.655	177.6	99.3077	120.739	259.726	312.085	65.8214	146.36	251.923	87.1636	344.018	418.208	102.543	106.458	303.357	90.5821	121.853
	143.522	324.871	119.262	323.53	109.39	132.703	129.525	428.724	231.679	211.785	244.983	164.461	170.487	103.083	105.682	224.371	140.233	49.0588	170.481	303.367	51.0588	335.2	465.195	122.403	115.662	281.982	275.031	99.2029
	331.804	297.253	132.753	434.967	134.971	89.4783	98.7333	495.839	362.167	228.974	364.392	153.74	189.897	103.862	113.358	130.192	292.368	41.3929	185.623	264.158	75.8545	321.559	238.508	122.568	105.184	207.05	248.483	82.4167
	384.191	339.745	125.927	290.288	150.88	345.972	306.975	373.091	285.275	307.614	170.393	161.439	171.07	105.161	109.395	168.779	179.098	54.0714	246.365	220.164	92.4727	282.871	436.192	110.52	115.912	269.675	252.275	134.814
	332.972	298.842	141.87	322.627	147.838	354.094	261.464	317.203	291.595	225.783	204.175	168.424	151.264	92.2133	112.054	170.063	265.436	45.5763	184.955	191.372	227.545	330.151	469.39	274.649	110.542	246.81	245.82	95.0128
	264.371	248.743	109.985	341.014	139.556	69.3611	211.377	389.41	352.228	250.382	394.716	154.455	82.1972	113.85	114.681	153.988	281.845	41.1786	172.587	220.964	81.6229	272.618	327.222	120.577	110.095	349.171	263.552	109.889
	361.404	275.125	108.786	438.378	100.877	122.912	351.864	435.299	320.807	369.296	269.903	150.188	183.5	107.167	1214.92	200.74	167.179	36.2364	226.393	231.8	84.125	326.632	448.919	92.8983	117.271	254.246	197.985	121.358
	418.384	275.898	111.531	314.215	119.829	97.8136	201.879	438.594	228.375	223.466	261.681	200.433	158.576	93.8387	128.182	195.212	314.684	35.4203	253.492	231.681	66.0779	324.145	438.657	118.574	117.535	169.205	270.311	96.0781
	108.855	281.115	133.232	298.286	134.649	86.7333	198.443	473.474	345.951	313.014	271.244	184.899	160.553	109.217	118.74	173.182	235.513	36.9571	208.652	216.821	103.655	347.768	448.353	103.964	118.534	306.632	205.068	105.04
	125.768	420.962	122.806	299.459	134.947	77.9385	190.789	597.727	191.7	297.125	230.815	169.878	150.276	107.463	125.797	150.079	240.688	39	243.224	227.169	68.6471	301.277	299.5	133.228	111.714	427.5	245.153	98.5063
	136.064	342.58	127.82	298.477	91.5479	69.4051	219.974	462.712	244.627	233.418	368.756	155.127	162.667	104.949	105.958	156.92	245.803	187.194	211.333	200.152	127.662	321.043	293.476	107.818	119.333	266.85	263.25	115.956
	139.82	359.382	109.329	375.693	125.514	119.327	153.885	345.298	304.214	307.362	302.301	176.838	157.208	115.887	111.652	162.408	282.309	45.08	265.823	210.237	90.6667	297.417	363.576	101.224	100.512	257.485	232.43	99.5424
	113.296	291.092	126.487	332.917	111.973	84.2241	246.279	391.522	142.089	270.373	307.19	161.167	172.885	107.068	113.39	324.795	344.35	200.155	186.646	222.408	72.6757	359.87	614.753	105.653	120.158	299.155	250.338	108.196
	132.556	304.763	150.971	239	131.618	173.152	191.857	434.949	330.573	249.762	305.568	172.38	157.701	96.2933	76.013	356.079	307.776	294.163	195.5	241.93	100.31	317.971	490.958	211.027	103.908	165.447	194.618	124.052
	184.196	294	119.194	313.632	139.615	105.636	104.578	369.5	309.763	157.328	297.125	166.881	169.987	94.8933	129.9	321.797	305.162	234.914	233.632	258.662	84.2667	291.641	333.015	102.838	123.554	203.366	202.684	100.521
	114.815	295.269	124.743	295.658	99.7042	174.983	174.355	448.397	370.104	317.231	289.804	178.5	182.702	102.613	115.333	136.917	223.082	315.571	250.817	122.127	100.692	292.063	465.308	230.886	103.872	290.192	273.793	107.417
	115.706	282.192	108.954	292.84	117.145	117.148	128.907	283.681	209.145	297.788	236.385	128.133	152.875	116.907	107.272	154.257	246.039	268	249.861	225.403	90.2267	318.051	211.642	200.768	98.4167	199.27	237.569	90.6379
	156.605	279.766	126.186	292.333	113.548	172.574	243.821	314.16	311.244	223.267	284.597	155.48	175.686	111.35	116.301	273.689	220.842	231.041	246.65	316.086	107.356	241.974	320.358	188.195	108.278	449.625	255.3	116.521
	124.053	287.262	117.581	356.231	140.034	312.553	277.784	328.661	273.4	287.456	310.885	163.563	177.964	111.159	116.738	410.868	281.052	248.121	203.595	308.517	70.2424	339.258	350.275	230.462	73.5821	246.026	235.03	100.864
	125.735	438	102.064	254	32.7576	322.25	127.123	327.4	268	295.161	147	199.765	158.662	96.8667	112.746	343.772	311.433	203.886	275.723	213.676	106.435	297.403	342.169	132.39	90.7813	331.689	250.103	99.5811
	140.137	449.491	107.753	283.27	169.368	288.228	419.667	332.323	557.753	187.477	306.845	156.923	153.544	95.8158	108.644	232.468	250.769	78.3273	213.155	324.493	103.361	371.539	369.746	302.123	122.298	380.464	201.164	99.6719
	158.372	434.813	130.413	272.407	99.8841	312.661	383.946	361.329	109.436	192.205	341.603	163.835	177.531	103.732	103.265	277.986	329.662	169.761	270.055	274.862	200.871	209.275	606.147	352.104	98.3929	264.532	251.791	115.878
	141.947	428.584	107.096	280.769	101.179	292.441	106.451	360.433	499.708	217.586	198.377	167.931	126.055	98.1918	109.145	158.719	276.13	428.676	204.597	245.539	121.544	268.304	214.56	225.516	106.937	284.971	273.393	84.9155
	89.3824	401.474	94.0862	271.577	109.311	153	166.909	338.365	519.945	310.438	458.759	132.592	168.87	107.219	121.465	186.652	291.802	185.536	223.485	312.663	102.328	321.544	344.962	87.5263	118.387	303.525	237.338	114.814
	174.797	394.902	126.292	326	175.727	103.639	146.741	340.672	679.112	319.525	361.188	148.87	194.817	90.2537	97.8793	235.015	236.772	173.313	204.375	236.303	51.6984	283.493	208.254	364.538	116.379	327.263	242.575	93.3704
	106.746	398.895	116.127	327.842	167.571	79.7119	305.967	409.5	176.806	161.175	319.969	125.125	181.466	98.3684	95.0147	269.778	278.596	236.25	201.609	210.606	131.55	297.897	337.514	178.417	118.119	222.929	268.218	97.8333
	110.852	446.862	114.734	291.271	110.31	144.161	218.317	379.354	99.8356	182.773	268.104	160.923	160.542	98.1231	91.7344	154.862	223.641	166.367	243.135	271.734	69.9474	320.975	404.034	113.471	103.39	103.41	226.057	113.766
	146.404	299.787	110.169	266	162.443	93.6618	113.641	343.581	229.318	306.592	300.639	167.15	162	128.316	109.254	184.013	246.894	167.596	259.679	76.3091	105.038	355.696	472.662	123.328	116.617	435.696	262.236	103.468
	123.769	239.475	126.76	334.37	157.567	92.403	195.257	356.595	521.961	329.461	243.368	160.051	184.731	77.403	111.639	195.81	216.89	332.694	232.169	220.549	190.137	406.16	325.351	260.388	110.667	281.962	258.456	135.855
	153.983	306.908	122.403	288	118.608	80.0172	168.917	337.719	674.364	272.475	156.885	154.566	181.321	115.418	110.606	266.529	176.483	159.453	146.917	340.635	194.415	368.107	437.797	269.731	104.513	207.455	232.576	98.3771
	117.051	258.849	157.906	235.679	159.026	59.4138	135.822	389.241	111.209	224.514	259.859	147.132	185.707	93.2069	120.446	311.892	311.57	249.179	210.282	320.941	185.182	318.197	178.538	139.06	95.411	247.561	225.136	101.214
	165.592	254.925	129.641	297.104	160.639	83.8226	157.395	327.413	767.311	214.288	321.474	158.074	164.262	109.154	107.847	287.5	284.107	216.049	198.306	332.831	192.935	322.481	300.365	267.525	146.678	204.362	218.533	93.9028
	165.536	261.667	125.924	279.397	132.813	79.0923	178.821	347.283	506.569	296.212	342.234	160.918	174.75	102.027	114.652	298.478	292.807	160.417	215.974	215.259	168.886	321.733	425.286	112.964	109.025	153.942	182	105.066
	160.515	239.2	103.885	281.068	126.727	228.293	104.064	390.754	113.027	306.407	524.364	158.77	154.385	111.057	127.94	280.961	262.188	183.538	241.207	245.922	109.742	340.418	330.521	269.109	112.987	255.298	69.4931	115.347
	174.818	221.155	151.263	302.37	129.743	85.4915	125.711	468.788	599.029	269.492	181.403	161.802	164.667	91.1014	119.561	202.531	288.468	394.5	174.308	302.824	90.1538	333.313	262.156	171.483	93.2317	260.558	190.268	101.859
	190.268	242.933	115.608	258.411	137.494	61.8197	159.118	372.689	442.608	171.444	370.722	152.095	174.041	99.2	99.9048	293.417	450	379.772	260.643	215.141	92.8276	303.573	397.333	274.57	110.563	247.591	218.884	99.0247
	181.556	283.269	130.276	295.63	124.955	73.6301	136.479	310.491	349.815	360.211	346.471	182.508	169.577	97.96	98.1316	288.897	248.04	182.607	266.417	212.088	133.667	320.793	431.822	270.73	126.449	150.793	49.0615	113.684
	388.667	214.136	114.891	340.105	132.027	93.1967	117.845	399.183	586.687	277.97	306.903	162.051	101.804	94.4487	115.5	262.44	199.487	246.542	222.052	237.851	31.625	297.703	348.529	289.423	95.6974	153.478	204.763	115.475
	181	246.613	112.875	328.57	104.372	53.4219	135.662	396.957	372.586	205.736	289.2	169.365	175.586	113.769	122.769	291.603	275.015	141.824	222.701	223.143	65.5778	321.328	347.254	106.2	102.461	104.513	205.658	120.911
	82.5636	283.458	98.7931	242.431	103.606	110.286	125.655	468.62	405.542	272.914	265.667	175.538	138.692	104.833	111.463	354.811	277.72	193.709	249.091	189.633	40.5357	292.644	357.644	121.338	92.7397	35	181.465	94.527
	507.826	259.818	127.795	272.965	134.074	98.4769	151.862	411.263	324.776	249.792	382.129	175.737	162.862	105.149	124.938	201.7	254.855	206.102	265.338	276.324	94.6607	314.681	335.386	108.894	104.066	190.286	77.0606	110.37
	157.253	335.154	118.514	260.615	141.641	92.5593	157.119	476.324	788.6	269.615	457.422	152.515	166.747	89.1711	124.811	279.452	252.233	241.782	222.587	229.984	68.7875	318.338	385.646	114.643	114.975	114.835	243.742	88.4143
	579.92	225.153	126.149	281.052	139.13	77.0164	158.325	328.328	428.322	342.129	301.632	210.552	50.8393	85.5069	132.156	140.133	326.803	287.072	202.618	349.543	62.7619	278.241	322.803	102.097	118.74	123.352	220.147	99.3125
	488.91	233.805	127.983	287.123	127.692	83.629	185.683	436.261	296.942	211.873	350.896	140.714	158.961	85.5424	118.2	342.703	290.538	238.205	239.13	279.636	38.7818	294.325	233.071	123.589	116.429	117.795	238.525	101.125
	521.789	244.304	136.704	276.224	131.596	76.1636	158.696	344.462	526.851	302.161	216.257	183.915	149.086	48.1733	141.459	224.842	248	240.545	249.125	287.629	137.929	272.294	295.706	252.603	115.342	102.947	249.464	96.322
	405.431	253.795	107.098	228.254	195.953	89.1039	117.85	487.015	690.888	362.014	257.5	174.302	164.09	116.773	112.768	299.816	216.397	185.568	231.654	245.769	103.449	316.986	202.551	121.19	90.4667	115.933	223.545	96.1571
	513.342	268.959	112.2	251.471	131.746	124.649	152.459	330.178	607.034	331.303	203.643	162.655	152.414	117.544	110.597	295.274	194.45	188.4	224.857	340.97	154.745	321.098	416.242	290.934	114.718	121.792	263.944	132.803
	203.746	249.107	117.963	271.956	142.667	111.94	98.8533	384.907	695.822	263.862	92.4211	159.818	158.141	108.787	102.658	184.4	259.507	298.468	215.577	294.947	141.917	286.75	552.814	239.833	93.6944	102.209	235.457	91.0877
	342.5	291.076	112.908	348.789	129.708	94.2877	176.608	407.576	253.675	312.797	243.789	176.493	140.889	93.5082	114.137	370.026	259.618	206.831	259.141	215.719	148.705	359.859	381.119	138.449	105.276	325.345	230.516	92.1765
	511.289	293.352	113.026	276.304	139.369	99.8919	132.169	387.413	421.915	302.395	195.5	209.921	149.25	101.343	109.082	280.773	107.52	247.475	146.299	384.65	75.2969	307.23	319.235	271.453	95.1233	119.269	240.682	88.4789
	549.219	312.403	108.85	256.121	119.045	129.081	114.108	309.5	614.726	185.424	72.5238	183.912	165.547	116.25	127.446	242	163.884	282.633	225.382	300.898	124.767	337.778	239.676	187.635	118.697	112.853	213.28	87.2911
	169.364	233.915	103.915	233	148.518	82.1644	220.646	333.039	363.306	232.69	152.154	152.608	135.662	125.278	107.138	253.779	142.617	227.254	252.97	305.187	131.362	355.1	300.836	356.307	113.802	292.329	251.594	117.369
	170.186	235.243	108.5	299.154	81.7917	67.931	136.986	374.053	678.91	291.897	205.3	140.361	168.96	88.6111	111.949	285.475	381.911	173.886	183.938	201.541	60.1972	316.647	269	239.835	111.917	203.887	263.65	109.973
	397.913	276.911	126.587	239.622	123.672	75	164.787	305.311	755.045	275.138	236.643	182.109	143.411	93.0536	123.644	278.4	59.7632	218.056	230.645	178	128.947	322.944	234.2	218.729	109.917	135.768	214.051	98
	433.125	259.397	118.25	280.783	118.207	70.4063	132.5	328.145	365.19	297.972	225.054	160.795	144.557	119.639	122.757	223.76	51.1449	216.724	267.934	199.855	115.821	272.118	280.842	203.675	106.253	309.877	264.662	85.1579
	235.838	294.847	102.825	333.486	93.197	122.464	150.369	299.985	672.457	263.65	204.197	168.833	165.847	129.017	102.955	265.164	80.3788	249.813	228.862	300.972	93.0385	247	264.764	275.205	103.879	167.654	272.97	84.3117
	627.25	238.41	119.688	238.013	146.372	64.2222	143.852	476.826	300.114	282.292	238.615	173.076	155.615	83.6986	115.103	264.101	82.1071	239.15	245.206	362.567	75.2308	248.141	255.054	246.154	107.644	230.732	241.667	83.4576
	396.885	241.559	112.707	253.349	158.172	130.933	143.509	490.4	692.795	206.808	172.474	184.676	144.6	126.966	114.286	273.347	70.5152	209.325	286.702	282.735	61.25	243.373	273.779	250.512	101.8	381.167	289.603	92.0833
	502.986	281.5	114.966	283.75	167.351	92.3182	144.875	405.017	488.974	235.875	264.656	156.389	162.039	103.042	122.944	254.824	55.4868	175.241	291.255	289	152.638	293.039	294.366	252.115	113.431	272.038	274.043	121.359
	554.726	266.611	106.357	417.909	149.859	61.9123	141.143	510.083	443.263	179.594	308.573	163.863	1145.73	100.839	116.339	271.156	92.75	247.08	230.138	363.675	183.676	252.364	223.082	218.544	114.191	125.803	292.729	100.082
	168.658	318.359	139.981	237.097	168.966	90.2623	105.714	472.8	607.286	258.739	252.636	167.393	144.705	77.5823	122.863	335.176	91.1897	147.532	208.5	232.775	131.021	256.911	295.082	201.714	110.189	228.914	246.671	101.494
	468.328	282.631	92	261.565	127.934	75.8	149.962	390.029	714.08	269.75	231.415	154.013	167.658	91.8594	109.835	246.449	59.4722	249.436	235.621	242.149	165.529	240.553	290.574	215.042	107.764	224.378	247.818	107.087
	61.7846	264.481	126.444	292.892	169.085	71.5593	114.4	381.532	731.384	269.36	326.203	149.522	156.302	50.4559	96.6197	196.373	55.8846	257.769	262.846	306.857	81.6351	288.903	344.625	169.323	121.553	377.172	238.153	100.684
	110.794	329.333	127.683	215.158	163.609	115.566	108.288	340.111	593.184	229.794	327.935	157.753	113.958	85.6875	126.878	186.538	61.3607	212.275	187.955	283.13	99.6716	267.759	363.892	171.295	96.2727	128.113	170.9	113.243
	203.238	321.937	130.129	249.558	142.968	70.8525	145.333	331.276	817.313	173.013	162.036	154.492	199.507	104.367	125.71	252.444	42.679	111.036	284.444	281.68	146.151	288.647	357.864	243.653	108.95	227.231	233.729	104.857
	107.692	292.492	124.667	222.946	152.179	59.5526	152.351	320.895	337.944	344.672	279.013	167.297	146.384	94.5893	107.03	235.221	52.6981	178.129	224.696	264.794	102.457	362.893	404.618	152.4	108.754	214.447	274.237	114.851
	101.797	294.949	100.87	239.41	122.481	120.397	120.25	356.065	740.486	284.514	314.545	177.279	177.85	89.4615	119.408	253.102	35.7925	57.8182	207.368	221.253	110.133	339.966	403.313	105.453	111.961	291.322	227.718	106.972
	109	258.189	119.923	316.74	125.234	87.803	137.949	325.667	444.353	252	317.864	167.389	165.902	118.375	87.7241	228.518	58.6296	511.433	201.81	306.808	118.456	266.726	410.152	128.052	133.471	153.467	214.09	119.203
	153.59	299.8	125.672	286.741	120.464	87.8333	116.794	351.471	749.859	265.721	254.942	153.097	147.734	103.625	127.215	273.568	149.917	181.333	240.264	234.881	120.185	217.899	189.5	123.926	105.218	196.237	226.303	124.127
	155.348	289.303	116.167	439.597	123.338	143.093	168.068	319.774	464.133	159.97	266.587	156.821	163.516	102.492	142.128	290.333	156.804	194.712	173.853	257.276	161.146	269.473	347.448	112.922	116.321	201.902	271.113	111.577
	165.804	327.242	130.819	226.105	113.938	139.657	102.156	422.348	258.959	91.9452	278.344	186.522	150.933	92.2078	106.623	214.329	149.215	87.0366	161.344	323.882	207.691	264.938	383.685	277.443	94.1639	293.636	249.77	97.3636
	164.721	269.712	139.411	251.761	119.971	102.373	136.776	373.273	471.75	140.768	343.316	173.456	150.608	92.7727	202.943	367.457	135.256	473.818	257.569	296.377	72.2319	282.062	308.817	107.957	117.908	263.219	242.653	98.9821
	142.542	287.425	82	267.014	125.459	80.8028	137.247	492.523	634.805	206.192	190.676	169.317	164.264	79.4189	116.423	264.667	152.714	410.984	168.311	271.324	146.97	273.452	415.233	252.724	102.186	292.246	266.4	90.3766
	186.118	299.582	101.952	304.355	125.257	56.1447	142.868	427.154	239.41	177.451	294.4	192.908	153.525	115.017	131.983	329.203	133.386	330.484	224.907	290.886	122.466	273.191	349.705	179.689	111.16	76.4722	270.506	92.6491
	149.013	271.415	113.623	264.027	116.356	77.5429	132.149	404.608	506.833	116.311	162.887	194.121	157.064	101.71	117.164	320.299	141.442	164.233	193.727	279	104.5	209.062	428.19	202.662	106.864	78.4265	263.429	100.414
	114.431	265.55	143.586	316.214	110.467	72.254	132.508	425.163	517.182	227.806	319.225	165.701	176.514	105.164	133.859	270.3	300.792	164.481	277.582	246.312	171.492	264.835	384.09	275.891	113.486	106.389	255.924	109.608
	103.321	256.464	135.867	254.152	139.288	119.943	130.052	417.927	631.712	135.313	265.441	161.544	173.662	130.934	139.708	259.846	158.657	158.31	188.71	363.768	170.171	302.359	305.514	172.417	101.472	110.8	250.5	100.632
	93.9818	376.534	142.339	226.614	119.379	86.9863	107.234	398.091	370.698	246.098	488.579	169.017	151.922	107.677	98.973	259.661	131.068	420.644	205.892	270.294	109.03	283.847	517.259	261.015	120.046	113.149	298.393	84.1406
	121.368	300.342	124.638	255.678	111.855	69.7763	115.348	322.264	481.681	231.71	306.742	174.406	166.137	101.359	108.295	247.707	248.934	299.127	250.207	203.522	177.896	319.508	388.671	307.894	105.377	107.232	231.683	113.531
	442.179	258.52	140.068	240.791	114.364	84.32	133.32	362.493	480.59	218.544	333.882	167.107	153.926	82.6271	136.183	288.413	277.636	242.38	217.635	235.782	174.152	218.627	429.809	286.699	95.3684	105.322	234.408	88.32
	245.75	258.632	128.915	524.971	171.576	101.406	125.943	270.565	405.172	196.447	176.818	155.127	169.071	114.456	139.5	246.089	112.515	437.391	247.625	351.603	212.85	250.861	342.273	264.466	113.397	130.518	268.873	121.133
	473.673	278.528	108.882	792.8	66.9344	75.4865	107.889	346.271	596.104	196.653	230.31	158.915	492.507	81.3889	108.473	238.289	226.676	141.343	259.684	241.371	178.197	240.197	463.821	223.296	91.0526	347.25	233.047	114.825
	447.655	263.308	109.367	599.197	115.064	129.932	115.42	406.729	652.5	105.677	191.782	149.903	158.339	114.464	143.702	190.738	229.299	172.333	282.289	245.866	182.237	257.38	436.526	245.923	73.5128	319.416	223.946	99.1944
	619.038	314.333	121.962	427.707	209.938	142.556	98.6567	380.595	660.258	200.575	233.236	176.688	388.235	95.2	111.067	385.257	268.244	307.288	279.718	238.236	184.768	216.684	389.369	259.129	111.883	260.644	243.625	95.8356
	553.339	253.423	127.886	580.967	94.7353	113.614	198.493	338.149	871.82	203.096	274.308	175.829	152.889	112	116.559	174.913	229.121	150.079	248.507	291.899	160.414	262.095	372.042	109.529	108.529	305.265	241.73	101.06
	589.538	248.189	134.038	707.627	126.743	134.955	94.5714	328.738	181.958	174.607	273.303	147.108	167.404	100.303	150.806	161.929	188.907	159.329	244.568	250.675	176.321	220.6	306.983	245.5	108.691	265.06	234.937	111.206
	235.647	333.946	134.637	654	118.494	94.5789	99.3143	307.944	457.138	181.817	361.429	166.887	177.259	110.456	120.238	169.441	228.926	388.462	246.478	207.744	191.783	273.431	382.219	107.196	95.8462	290.35	269.958	106.371
	574.342	266.116	131.27	710.959	107.162	169.386	146.456	321.475	794.747	210.127	287.535	201.271	158.161	130.786	131.208	157.28	217.987	155.541	304.447	386.521	155.878	454.635	317.121	302.266	108.653	253.985	244.039	113.842
	548.404	254.589	95.2881	500.509	109.815	119.262	147.458	262.143	625.841	191.569	254.418	183.04	151.985	95.2	124.657	267.213	257.026	246.354	232.671	285.819	255.208	339.167	375	127.621	113.465	196.712	268.123	102.474
	544	245.293	116.367	624.897	141.07	69.9559	89.5857	364.081	478.093	239.032	342.254	158.974	166.4	84.8955	115.689	182.806	218.314	162.456	213.959	330.986	316.935	241.475	381.138	350.859	114.134	239.362	321.623	94.962
	534.931	284.963	126.705	698.955	117.242	123	155.146	332.945	708.768	130.703	262.971	152.125	175.672	103.483	127.532	130.115	245.873	154.823	162.381	289.986	358.427	241.068	390.661	273.449	102.797	275.35	284.595	85.7067
	633.281	339.558	122.506	496.532	117.381	138.694	137.643	454.708	575.697	201.662	323.756	159.566	188.973	118.164	118.571	259.764	246.183	405.256	232	347.573	309.508	276.778	371.141	92.1186	126.576	260.133	261.871	102.19
	557.113	241.431	138.785	617.162	107.314	124.882	160.277	392.883	579.678	231.299	284.209	174.468	142.092	120.117	109.975	215.645	222.338	253.293	249	240.092	180.483	285.712	301.841	128.638	110	215.366	227.761	109.538
	488.049	286.681	112.339	424.822	101.821	115.507	164.962	375.962	303.779	218.756	358.441	157.391	349.39	122.466	106.209	278.988	218.471	305.827	243.563	280.959	276.597	269.956	340.513	91.8608	119.797	304.946	276.754	99.5395
	686.079	243.965	129.968	677.185	154.32	95.1343	181.016	307.913	384.026	206.529	328.847	164.267	159.105	109.6	117.224	334.661	220.397	271.367	245.258	277.597	94.3662	291.318	290.884	129.309	106.232	107.597	212.573	121.429
	240.738	274.026	109.419	656.747	158.961	93.25	136.865	453.139	527.274	222.845	322.432	134.938	153.534	107.536	122.588	231.197	282.857	270.449	175.903	266.424	151.395	255.5	312.208	258.258	124.165	351.225	270.64	107.205
	219.538	272.911	105.148	795.233	184.742	183.396	186.8	401.307	726.083	106.704	375.759	182.734	196.892	109.043	117.708	312.286	140.8	306.134	228.562	206.716	403.238	304.887	247.75	205.35	94.0923	224.936	295.959	118.444
	564.27	300.279	113.309	583.063	172.276	149.946	153.345	302.422	485.924	197.328	258.71	177.414	138.158	104.824	108.257	293.478	237.838	161.143	250.795	228.449	345.375	242.289	391.258	356.532	83.9474	201.015	242.378	102.107
	305.409	273.85	104.766	605.818	194.111	103.013	140.368	294.333	551.767	221.45	339.065	152.636	140.268	101.297	121.066	154.822	245.353	305.983	204.234	274.826	265.13	248.721	470.716	320.265	99.3704	170.236	275.169	105.203
	479.143	272.45	125.671	477.075	159.403	130.026	130.267	344.333	657.277	203.688	401.691	157.821	143.743	108.275	142.522	154.781	218.053	284.293	207.829	264.284	279.857	263.646	414.367	350.525	127.247	327.133	260.404	106.538
	498.069	323.944	115.705	634.183	151.592	101.797	143.072	486.1	620.247	190.617	335.029	172.018	151.787	87.5443	147.39	277.457	236.314	327.114	230.681	256.056	326.6	527.647	363.4	269.355	100.808	279.985	255.45	110.391
	524.189	297.261	122.771	577.785	98.5897	78.0139	158.569	299.329	629.316	254.9	328.286	171.896	156.922	112.87	124.671	228.961	240.684	294.797	288.39	235.092	367.75	559.138	509.81	181.652	102.7	269.181	247.032	107.423
	610.561	280.695	139.429	599.382	157.191	72.5735	124.229	410.082	253.053	207.228	291.974	144.541	161.946	99.4167	126.985	269.125	265.027	238.049	260.806	257.281	311.564	595.571	244.806	308.576	104.658	360.373	220.426	92.1081
	427.676	247.029	119	558.364	100.443	80.9661	100.111	346.771	540.644	253.691	301.847	163.803	151.271	120.775	128.517	331.836	268.313	256.693	270.203	273.392	174.366	419.69	381.354	143.987	107.667	37.5862	237.237	81.1875
	433.244	272.194	119.429	583.559	94.5077	146.762	131.149	320.111	570.767	217.896	276.783	174.725	156.246	105.71	111.269	285.625	263	308.778	177.739	268.127	405.381	490.291	435.214	124.854	103.127	119.85	234.102	95.4342
	881.831	267.014	132.196	571.842	135.462	90.15	139.357	328.962	234.949	229.073	312.75	164.723	128.974	93.1053	126.896	353.406	193.616	348.776	285.911	310.299	98.9091	938.41	453.667	267.177	140.437	286.975	222.887	91.4198
	507.791	310.628	102.253	521.053	161.677	99.9872	125.986	345.605	713.137	216.776	355.325	154.225	159.983	99.1127	110.769	261.179	279.899	332.642	247.797	255.169	104.16	387.382	278.789	199.328	115.153	202.77	272.635	93.2687
	372.644	276.795	95.9833	551.368	138.859	102.47	72.4516	363.732	539.132	192.443	296.197	183.859	152.359	94.6267	125.108	242.156	237	321.773	254.393	238.926	183.309	441.803	349.941	149.867	105.906	140.286	235.411	93.9242
	791.682	254.25	114	655.373	142.333	425	141.241	287.431	810.8	239.328	300.839	176.571	137.855	103.098	115.855	205.649	227.967	240.246	234.184	274.212	205.254	469.736	390.119	198.836	101.569	265.872	256.105	94.3088
	649.855	267.155	109.671	638.25	152.214	127.671	158.536	261.348	544.62	215.479	286.692	176.969	147.55	101.683	125.558	283.677	250.881	238.058	264.684	268.855	178.071	403.658	347.6	229.559	104.922	243.646	252	92.1552
	713.045	257.362	128.104	665.167	178.573	115.153	121.286	361.211	576.218	207.156	369.304	171.385	163.581	89.2	133.484	240.067	259.587	256.758	268.71	273.722	170.567	489.653	314.184	156.967	138.358	261.815	282.375	107.091
	632.569	274.042	127.931	315.803	168.721	102.93	135.759	361.152	281.353	195.102	312.899	153.472	157.357	133.632	139.536	291.333	233.169	267.375	233.667	184.584	251.094	392.518	431.061	200.225	93.1471	103.366	334.139	97.5484
	513.015	277.657	102.554	532.173	108.145	392.831	131.591	352.303	669.818	165.45	444.714	161.949	161.472	92.5303	115.712	282.177	227.052	217.106	240.221	206.229	155.05	472.154	300.197	415.218	121.394	121.721	244.768	120.359
	672.446	325.313	148.342	605.867	143.694	74.0694	117.912	358.436	436.151	136.464	345.027	151.701	165.026	111.63	128.934	315.648	250.063	343.942	258.154	127.391	170.102	555.197	366.559	277.959	113.132	98.6154	273.417	103.792
	393.794	248.19	117.743	547.13	131.284	66.7067	117.576	333.957	557.91	193.483	313.987	170.829	415.603	126.303	138.716	251.537	170.637	253.26	282.733	302.026	193.838	422.174	466.862	200.433	119.954	110.588	320.719	84.7917
	211.822	275.5	150.5	771.811	126.97	136.492	119.419	284.148	489.861	197.25	386.381	151.071	135.732	90.9385	110.461	230.565	55.6393	278.25	217.75	184.805	178.035	389.172	436.987	122.608	117.247	94.1618	266.588	102.774
	554.584	297.691	106.415	605.36	161.101	220.03	117.127	296.603	256.975	211.652	194.767	177.367	152.654	91.2029	119.597	272.297	198.968	319.281	258.931	100.953	206.831	402.437	329.525	209.418	114.566	206.667	246.195	104.709
	625.554	286.387	131.348	671.242	139.779	127.154	150.638	362.836	714.308	187.295	263.543	162.656	135.069	89.7467	133.312	261.563	242.88	256.254	292.167	122.217	165.885	345.323	536.387	165.776	108.75	105.557	275.324	121.243
	444.031	306.667	128.9	697.355	133.015	390.974	130.3	353.889	683.333	229.161	277.632	157.718	196.324	105.054	116.493	256.718	190.526	395.103	233.203	286.974	189.87	398.018	368.254	189.956	101.508	358.677	251.984	124.025
	222.03	278.775	122.308	568.808	147.063	73.8406	118.063	342.829	470.681	204.6	156.893	163.429	182.933	98.1169	124.582	279.816	164.271	261.976	239.975	153.557	185.836	405.115	383.961	233.822	100.838	247.769	270.387	101.718
	571.716	246.167	141.949	543.526	87.1449	115.273	132.069	338.091	399.862	215.967	354.609	146	133.429	80.9697	134.182	236.703	173.033	220.759	190.559	311.243	199.014	372.612	392.803	149.028	110.029	104.484	291.443	109.971
	550.492	288.397	76.473	620.951	169.45	458.645	117.882	302.052	201.885	216.483	247.771	176.561	145.189	95.9231	111.61	261.877	249.258	219.161	265.485	303.393	114	385.629	126.852	202.253	117.435	139.056	249.526	92.2951
	457.222	271.822	127.455	550.273	140.233	130.544	134.046	380.705	503.203	99.9324	333.14	167.91	144.176	85.7692	106.719	214.636	183.343	304.25	205.342	267.176	311.379	328.717	426.857	157.528	113.538	131.016	306.026	105.421
	615.863	239.779	130.793	553.754	103.52	153.635	117.812	299.509	276.704	246.838	360.877	176.254	142.684	99.5574	101.027	201.693	256.159	211.026	173.127	280.91	325.104	454.987	504.589	201.65	96.7975	371	310.868	97
	287.173	260.582	110.426	635.041	176.672	91.2963	123.056	264.543	585.783	221.086	294.695	143.013	167.536	95.1948	112.73	309.547	291.466	259.7	224.706	275.155	374.333	476.765	453.145	104.605	111.529	456.098	252.941	106.106
	235.519	276.544	122.692	624.75	214.236	105.282	134.696	302.786	456.075	119.453	207.552	175.242	158.8	112.804	131.222	326.038	289.455	270.235	156.431	325.2	232.671	447.219	420.633	97.5	105.612	123.137	250.534	91.6324
	766.221	243.775	124.315	596.044	111.362	263.885	153.485	298.154	362.342	138.588	368.281	155.186	158.117	95.5789	120.987	147.347	309.672	273.805	255.833	244.118	301.917	416.68	321.887	112.391	120.468	305.924	261.773	75.8765
	573.474	258.957	190.175	546.864	171.725	178.405	124.333	358.914	441.464	241.897	231.221	166.758	164.947	94.3766	125.574	273.261	249.859	255.757	196.593	267.083	343.373	355.808	372.562	167.605	102.175	119.224	271.2	87.9481
	216.425	266.679	103.667	326.974	164.914	157.333	125.671	298.086	228.213	176.352	421.597	160.536	180.917	85.2576	113.5	284.342	273.164	286.139	292.553	283.808	116.727	474.846	502.431	224.243	93.7966	129.275	243.4	114.346
	444.271	262.478	91.3797	466.139	151.121	123.603	112.106	394.636	558.671	193.043	365.25	161.592	156.183	99.9655	111.737	433.307	232.5	268.361	133.759	256.307	360.967	420.521	296.808	105.455	92.541	114.899	265.306	108.039
	59.3064	206.692	96.3276	498.322	163.364	211.517	76.5479	322.825	326.178	145	427.607	140.158	166.312	115.013	114.823	242.738	228.386	31.8182	223.324	271.141	76.5909	347.972	327.603	125.753	106.339	209.147	292.175	96.1429
	150.333	289.044	123.39	317.447	146.044	147.962	109.027	327.649	583.844	222.754	404.603	184.205	161.153	90.4833	119.831	314.021	291.228	106.776	259.797	311.873	487.125	405.421	328.552	269.526	93.5385	224.493	238.737	99.1081
	157.54	279.732	121.656	294.688	262.74	245.813	97.7018	269.72	273.873	212.72	387.967	198.633	167.381	109.727	124.26	235.539	260.944	56.6493	216.974	223.283	71.9351	367.867	398.44	294.97	112.589	338.37	321.395	106.955
	150.881	277.308	121.394	313.712	98.7463	202.162	124.544	381.808	497.231	233.653	469.322	136.5	845.153	119.783	117.55	274.407	273.696	106.895	208.571	237.797	105.589	409.438	410.382	179.438	126.333	339.829	285.169	106.829
	134.881	256.817	140.246	337.262	129.544	127.405	106.881	323.5	272.962	178.053	436.429	169.54	147.111	123.5	120.615	224.925	266.972	66.8929	220.833	267.75	126.863	465.705	263.743	210.111	122.157	323.419	259.138	103.654
	136.143	275.565	146.827	359.119	145.338	211.063	101.696	316.195	140.561	204.462	462.514	169.805	173.725	118.041	143.676	265.759	254	52.5283	206.164	269.183	401.119	341.378	420.075	157.485	106.193	124.681	260.118	101.178
	126.069	277.388	116.078	285.143	217.481	104.45	39.082	275.514	297.633	155.45	441.8	157.026	144.533	101.256	114.639	295.737	157.553	59.25	208.721	270.679	318.577	498.38	242.212	297.7	109.684	109.862	249.662	111.625
	121.435	284.045	118.5	367.05	133.625	206.44	128.314	331.342	280.853	228.481	433.898	177.154	142.525	113.275	116.078	292.661	255.205	45.7167	218.373	306.338	332.975	422.862	443.831	105.227	120.23	39.8966	268.569	105.123
	159.936	280.971	100.816	297.738	141.295	163.517	149.066	392.257	455.814	201.026	504.972	180.4	166.973	109.857	123.875	308.014	257.306	56.68	210.125	262.127	437.438	478.133	437.5	248.949	113.205	39.129	254.526	105.102
	127.382	249.915	138.765	376.736	135.167	136.086	115.776	359.672	676.016	185.93	510.474	154.855	137.104	109.513	112.246	166.286	163.92	45.7671	230.064	282.483	448.397	458.55	453.273	196.056	100.321	39.2593	255.08	103.935
	137.707	267.078	96.2203	327.866	139.508	237.779	119.405	341.273	462.714	145.61	237.062	158.627	150.188	120.55	115.203	175	261.763	52.4559	203.831	292.807	428.543	421.528	424.607	200.549	103.2	126.45	261.289	102.387
	165.23	279.065	133.845	408.975	137.543	188.574	101.354	309.52	687.276	247.174	342.438	172.117	157.203	108.25	138.354	164.289	45.9828	61.137	164.716	260.632	324.333	458.824	497.771	237.737	107.059	98.7533	281.296	120.529
	127.894	272.765	122.299	316.787	93.4231	183.615	130.564	301.616	314.234	234.62	380.526	182.19	169.737	109.47	160.015	572.395	47.125	65.5692	192.986	243.209	222.691	380.507	413.816	148.195	119.918	43.4203	268.954	105.68
	141.828	269.864	140.884	314.529	133.747	199.288	112.466	285.662	379.492	166.783	372.603	171.707	130.299	94.8082	115.783	172.806	45.5	88.6936	190.087	279.345	145.544	382.933	404.618	150.57	93.8026	223.672	254.319	94.6579
	135.657	257.929	137.542	324.459	149.108	121.788	104.768	275.548	553.167	229.603	463.915	167.721	162.643	113.203	124.793	286.538	47.6885	57.1429	238.354	283.303	144.72	367.066	350.935	217.025	123	295.982	322.266	112.526
	138.375	274.893	127.09	290.111	110.189	208.429	114.5	289.426	263.839	119.538	168.746	165.197	156.872	103.646	129.757	315.308	43.9437	53.3182	140.969	181.862	59.0185	1017.86	353.568	237.394	115.092	260.667	250.883	92.8529
	116.692	274.069	131.25	339.96	219.769	245.263	106.862	259.389	596.339	141.696	285.684	134.948	158.387	106.679	122.262	324.2	170.122	184.224	210.847	265.694	29.8667	429.791	263.493	109.754	109.61	272.307	262.902	115.548
	144.057	285.185	121.087	263.183	227.186	236.868	98.3896	304.603	380.738	205.304	282.797	175.783	180.521	114.509	106.81	158.966	161.967	183.25	296.696	232.472	118.886	426.714	382.842	225.356	103.695	233.127	52.9865	116.087
	102.842	278.597	114.639	301.096	103.627	389.946	93.1077	276.219	587.455	156.1	289.014	178	170.639	105.377	105.214	269.635	336.273	56.5667	205.423	274.257	83.75	405.43	465.733	211.535	88.1728	296.092	187.683	114.723
	163.721	255.278	133.178	350.553	124.35	254.893	82.3429	273.797	663.6	218.258	394.243	176.181	166.431	120.644	105.93	303.845	286.521	204.711	192.062	229.236	75.3971	411.196	356.582	210.741	107.803	364.195	110.544	90.9265
	216.219	280.975	138.484	377	139.053	172.841	78.4746	288.486	490.322	176.757	222.564	168.824	154.274	89.2632	127.313	277.122	247.792	181.387	320.065	278.1	119.271	390.044	515.58	228.688	122.29	167.973	215.431	115.486
	59.4615	303	121.025	266.364	113.857	162.047	170.564	309.149	291.921	253.485	283.241	156.098	161.385	100.983	113.672	272.966	132.017	150.63	189.409	201.732	100.043	237.167	404.907	165.889	102.607	210.606	61.3333	99.7564
	120.194	254.145	88.9242	425.3	102.5	150.899	158.282	275.737	201.692	240.05	330.474	137.13	155.623	114.692	118.205	319.521	261.813	237.25	190.211	253.397	231.958	558.028	345.814	280.964	104.792	395.627	246.873	109.667
	118.091	289.097	110.351	358.838	213.657	548.424	93.5	301.971	333.147	99.7625	340.328	178.292	163.364	98.9107	100.038	125.694	100.822	186.164	168.91	298.946	149.061	658.6	270.985	177.672	105.115	310.682	219.204	105.643
	125.18	282.257	141.458	336.404	111.269	280	127.522	320.243	395.04	199.425	356.652	168.283	139.719	115.453	133.344	171.567	164.607	257.188	203.339	283.5	191.4	578.592	334.533	265.086	130.701	277.04	263.785	99.9828
	111.364	254.623	119.814	330.805	208.447	140.912	149.753	394.821	176.934	220.107	316.831	161.638	155.119	94.1487	109.129	187.186	173.627	48.2143	183.567	264.897	128.447	484.607	346.041	274.776	174.57	298.342	229.136	97.7286
	207.441	288.034	137.069	324.316	104.867	340.306	130.586	369.516	354.25	254.783	417.697	155.868	156.726	111.88	115.31	142.125	183.435	176.421	210.42	216.465	85.5132	311.276	366.946	298.262	133.386	170.39	207.911	102.764
	115.892	273.086	123.506	279.877	187.351	509.091	101.842	326.559	59.0132	165.919	506.804	157.929	142.169	96.0286	111.188	157.493	167.921	167.838	195.342	237.753	134.493	391.593	477.908	174.253	169.297	297.708	184.967	101.896
	146.512	266.25	123.702	299.673	193.439	195.899	112	304.461	439.839	283.789	337.544	147.461	172.667	103.716	96.9672	119.487	449.938	235.824	174.75	237.403	88.1594	364.543	403.101	247.841	225.438	222.22	231.808	103.821
	333.196	261.367	132.79	336.068	185.09	166.842	147.712	246.214	369.455	143.474	378.386	166.488	163.959	108.393	129.513	149.432	277.033	307.4	204.781	215.068	98.6667	409.695	478.987	272.299	167.7	211.724	241.556	101.273
	318.873	310.633	112.712	263.074	174.042	142.7	139.843	337.164	420.822	271.927	350.296	211.466	126.289	124.446	133.172	164.883	243.151	190.125	283.8	225.87	211.951	404.722	287.273	135.754	174.486	408.578	213.544	97.7639
	589	242.357	118.405	315.211	165.512	251.897	129.351	253.627	390.014	255.519	453.362	184.103	165.236	104.067	133.925	394.214	293.328	212.724	271.633	223.507	176.608	418.288	313.819	259.298	125.455	166.574	231.652	117.563
	437.446	270.642	130.896	323.737	49.3731	245.677	131.013	267.377	615.917	236.829	369.842	207.491	127.824	98.8684	106.391	324.696	195.814	219.175	208.757	244.613	215.462	375.373	318.111	277.972	120.348	315.947	239.716	110.366
	505.272	271.158	124.423	323.603	164.697	545.173	105.877	408.274	470.018	215.464	380.906	148.098	153.391	127.45	107.039	338	136.688	155.351	222.247	271.863	178.803	401.263	395.338	201.657	138.73	179.143	195.302	123.267
	547.443	283.694	135.344	327.946	154.813	242.361	102.074	248.317	355.206	235.167	338.595	149.059	153.902	116.569	116.907	279.4	168.461	272.203	209.529	206.816	136.797	437.013	176.415	409.538	132.735	225.028	233.815	105
	196.123	263.684	117.985	362.151	127.944	243.368	186.04	286.275	180.397	157.017	430.119	160.431	169.69	97.6857	136.884	260.115	205.8	280.427	239.577	136.893	168.78	393.091	359.68	278.136	151.564	271.338	245.964	103.138
	741.515	240.169	59.2535	352.519	101.783	423.567	109.09	306.179	356.397	132.339	398.382	158.551	163.585	90.7941	113.414	218.444	250.819	59.7966	281.141	224.22	186.388	315.833	384.972	205.587	160.165	254.068	260.545	109.395
	586.595	311.558	41.7119	299.59	125.443	200.203	103.289	290.875	517.671	151.368	301.8	146.175	137.933	99.8553	108.25	268.569	270.256	130.303	259.429	248.241	177.205	371.811	355.183	113.213	163.19	215.769	238.016	112.797
	464.901	253.925	150.053	301	245.19	122.931	144.432	337.733	485.969	202.561	286.567	177.868	139	116.567	129.185	273.233	216.012	237.722	139.486	213.342	94.1936	350.632	426.914	109.72	177.107	192.23	235.043	111.148
	647.59	265.279	85.3611	305.31	115.741	247.104	104.938	230.373	373.027	181.586	183.671	162.706	182.26	104.627	118.605	338.125	216.616	267.75	176	225.462	93.6974	488.644	301.246	98	141.5	407.805	198.136	108.147
	361.656	266.595	141.433	291.65	118.896	551.926	100.318	348.317	89.6522	213.329	308.809	194.603	140.39	110.217	118.235	289.509	207.582	267.732	196.987	231.508	126.564	467.356	323.036	109.091	114.138	266.872	235.457	118.099
	526.758	256.406	106.238	317.932	124.631	478.195	136.896	277.5	478.914	164.427	219.5	213	179.663	98.2658	118.775	261.029	196.813	240.075	228.54	229.139	133.785	264.571	302.507	114.603	132.038	295.705	265.912	106.321
	464.347	269.162	114.033	334.079	188.623	512.076	88.4737	334.873	438.513	152.639	331.754	156.493	155.672	103.382	106.893	295.482	234.183	243.134	177.46	306.625	177.058	371.457	311.513	95.9577	181.161	198	260.508	109.111
	226.863	227	91.5278	247.785	200.65	466.11	71.6909	295.408	427.333	229.732	347.896	180.333	160.634	96.2361	111.612	280.934	225.905	231.076	236.517	180.972	123.842	416.165	372.521	115.606	131.224	253.16	258.243	89.85
	673.6	235.59	135.519	262.931	86.6462	161.892	243.483	323.904	345.313	214.16	213.04	261.632	169.5	93.7403	107.443	273.594	275.171	217.193	212.464	236.937	84.1887	427.675	316.571	123.449	172.122	280.925	249.119	81.8873
	519.928	283.53	120.567	302.167	134.333	405.382	77.2759	336.909	428.345	158	336.323	154.518	167.039	100.419	126.418	228.328	126.965	244.75	295.804	236.119	110.155	383.575	312.545	98.4167	149.338	215.329	219.931	129.116
	614.036	312.547	134.215	336.143	187.714	212.127	117.461	310.846	409.171	157.129	352.206	179.446	152.175	92.678	111.629	299.41	259.198	257.121	246.214	248.014	89.8382	453.155	234.784	133.685	137.667	161.441	226.643	101.821
	516.369	284.778	127.207	346.474	155.759	120.829	122.781	280.464	136.676	252.439	355.03	179.031	174.857	107.613	109.947	212.911	252.422	189.196	201.908	236.75	93.6613	330.475	248.377	190.25	150.31	243.77	231.164	96.069
	406.308	233.029	141.035	361.536	173.529	251.322	153.43	327.474	345.588	192.471	361.929	178.875	196.789	96.5205	119.119	287.227	232.091	157.077	229.829	286.794	111.753	412.358	255.283	221.015	183.741	349.406	243.203	96.8571
	663.03	256.654	111.486	290.613	153.707	238.758	118.696	251.769	343.292	236.291	369.514	200.778	171.628	104.901	116.328	251.455	220.539	63.8861	236.358	206.217	86.9231	397.314	222.963	281.174	154.031	228.333	252.098	111.301
	612.738	238.851	139.181	357.375	111.439	480.475	115.764	243.765	442.558	194.833	314.211	190.961	147.695	107.188	127.694	280.671	242.333	192.581	221.065	269.62	113.866	296.345	231.789	243.906	132.721	225.072	231.434	104
	649.875	238.029	136.621	299.197	109	478.043	275	358.934	309.017	175.641	396.071	147.5	155.554	103.214	121.397	302.8	251.689	207.71	211.086	193.718	85.5763	365.329	265.528	407.079	152.304	250.328	240.5	94.697
	452.104	287.627	133.288	328.155	171.61	479.446	98.875	287.269	335.657	138.074	331.029	175.641	150.051	107.276	112.608	285.39	222.985	182.177	211.364	179.89	114.554	436.03	267.208	248.308	185.667	324	263	104.787
	624.922	248.133	92.3896	303.4	91.1447	633.067	129.141	290.957	312.597	251.423	393.954	175.683	153.302	115.271	114.778	199.466	171.911	297.57	158.228	219.131	102.018	413.179	263.589	297.621	188.829	270.975	223.62	92.15
	564.625	215.87	124.105	338.127	101.328	522.816	140.467	305.562	379.786	212.654	307.092	133.468	165.915	106.379	114.066	272.714	226.544	262.949	189.247	205.86	71.9091	362.125	309.449	204.257	207.643	276.84	247.319	124.338
	449.343	265.569	103.114	276.036	153	565.446	268.391	236.485	384.662	174.25	422.316	179.429	179.91	108.275	116.6	263.108	302.158	228.813	213.957	218.75	71.0968	504.359	382.543	247.986	150.603	262.554	230.82	94.75
	485.91	285.964	165.646	357.861	111.661	124.655	148.676	288.5	383.507	224.857	349.059	180.25	160.764	91.2727	116.813	308.026	221.375	194.536	198.897	250.351	67.9365	269.235	276.151	301.579	200.986	399.938	239.81	113.365
	603.718	247.291	134.338	247.446	303.872	602.241	106.636	268.321	449.879	191.682	329.222	170.843	171.077	73.3443	123.961	314.87	245.25	251.221	246.844	198.444	61.9167	403.388	886.173	168.986	160.5	319.516	283.875	132.724
	458.869	300.769	118.188	262.492	56.5667	95.6429	132.554	315.794	404.821	38.2436	300.826	150.09	162.487	105.841	117.317	294.493	203.697	120.111	181.016	246.607	55.5152	327.25	349.568	238.786	177.987	304.258	248.027	79.0962
	387.653	258.962	129.763	272.194	151.439	140.309	413.295	371.543	325.443	135.479	190.286	168.824	176.691	112.544	120.883	278.544	291.328	261.983	190.397	202.93	103.491	390.408	333.951	236.296	138.903	277.375	251.027	74.7273
	118.95	276.922	101.972	322.85	122.232	154.722	213.364	224.864	398.167	156.914	338.474	144.339	158.383	104.359	119.516	234.528	150.761	238.851	246.452	237.772	54.3175	350.057	451.654	197.437	125.113	159.394	242.079	112.315
	234.303	270.831	112.714	269.405	206.431	111	334.947	255.627	263.846	188.705	339.612	152.806	163.092	90.2208	107.693	255.778	298.324	233.175	275.195	217.102	56.0962	459.342	455.791	236.277	105.091	284.188	245.109	105.132
	573.063	287.926	114.649	307.955	42.0847	218.625	97.5972	265.091	310.5	185.065	338.443	199.033	183.237	106.456	117.866	252.305	265.348	75.1852	233.377	240.899	76.1176	432.517	386.649	216.086	271.039	190.566	229.638	107.291
	126.862	216.1	102.589	272.949	156.134	571.018	225.78	283.595	160.896	340.633	279.656	177.684	191.635	94.6154	135.802	213.912	279.833	90.569	334.836	259.697	41.5094	566.865	323.593	189.088	242.5	147.028	262.321	94.1571
	787.104	252.877	58.4727	350.844	95.5246	156.491	529.357	265.629	324.507	267.339	344.886	186.329	165.145	113.658	133.018	247.635	263.493	330.1	144.286	235.041	68.25	441.928	551.101	267.132	145.283	156.625	235.227	96.0656
	583.768	295.065	153.903	232.918	94.9512	111.49	116	274.667	230.362	317.644	332.641	165.789	192.661	86.1897	113.754	265.908	210.183	224.164	180.368	238.789	66.1733	257.382	507.662	183.389	196.833	223.37	223.706	96.9538
	226.103	241.553	49.0536	281.917	87.1493	200.877	407.246	336.622	363.513	266.394	306.352	167	153.034	104.821	135.632	226.986	261.133	325.366	238.688	231.603	56.4853	508.6	462.263	137.05	150.462	210.667	247.754	93.1571
	448.8	301.894	140.629	294.351	163.063	528.036	131.914	364.85	422.013	255.898	405.443	151.833	157.172	94.8286	110.291	283.724	260.458	263.338	138.165	222.404	140.826	398.855	344.529	182.337	153	289.552	209.764	103.718
	699.731	277.115	145.5	234.125	93.2879	196.571	250.164	285.164	268.304	339.691	317.704	163.151	173.603	109.434	107.87	338.605	265.429	258.733	200.594	221.543	117.475	432.759	358.934	306.091	106.338	218	179.141	109.632
	801.034	272.169	91.8333	277.135	179.042	97	436.018	246.721	339.982	325.113	279.922	178.714	162.571	99.1525	100.197	220.188	204.42	218.164	215.554	224.233	161.688	328.25	358.671	192.786	113.434	299.268	213.932	99.8704
	343.136	282.368	107.889	267.358	152.578	164.785	328.962	276.606	343.5	237.75	339.086	171.13	169.139	106.563	109.321	283.313	237.426	325.329	173.937	217.683	170.87	372.576	430	222.281	108.662	200.217	213.171	93.9846
	574.492	264.244	156.915	299.658	174.158	181.468	103.282	273.871	426.813	322.085	328.443	180.918	162.534	115.925	127.829	274.316	228.724	163.543	134.54	254.895	176.195	380.769	489.729	104.135	89.2917	251.859	271.814	104.54
	489.792	268.833	151.6	300.898	160.257	204.053	122.924	247.076	366.594	305.586	387.571	154.723	187.912	110.819	117.368	242.592	147.797	141.716	112.684	239.806	175.949	467.611	354.316	203.516	113.384	180.865	285.311	127.455
	495.493	274.878	90.9286	327.693	137.013	190.815	146.721	287.191	329.145	265.19	272.62	176.974	179.842	101.825	118.528	214.083	253.853	302.206	121.655	213.305	162.922	513.756	291.256	104.034	112.682	233.433	244.25	116.918
	577.844	263.39	92.017	339.872	90.4937	151.661	139.116	259.908	385.194	247.362	377.474	148.565	188.14	93.2222	105.658	205.5	230.795	177.109	184.137	253.66	157.269	440.743	342.972	97.1622	114.661	209.053	237.62	91.9661
	643.254	245.148	123.817	306.792	171.625	128.678	488.576	255.186	351.818	328.683	387.891	162.877	175.101	110.92	101.941	203.116	268.423	175.22	138.035	242.036	192.5	503.192	370	107.662	112.097	257.152	292.052	106.431
	727.968	260.662	236.241	277.033	169.214	576.987	307.852	295.263	375.658	329.888	274.253	171.278	182.303	102.152	105.982	168.827	257.015	161.156	234.919	278.571	168.966	342.571	321.279	90.8421	97.2535	243.28	276.609	105.825
	276.243	248.814	247.412	289.84	170.053	571.885	261.044	295.403	289.983	403.722	403.893	178.703	195.097	106.68	114.213	171	234.931	143.155	149.637	247.727	149.941	306.45	328.884	89.1667	118.109	156.557	231.411	116.764
	232.441	280.945	117.649	268.586	110.556	173.212	248.098	334.945	390.667	391	211.064	187.507	161.623	92.0127	118.04	189.333	229.702	162.433	228.688	181	162.76	431.393	412.882	92.8594	117.836	276.188	280.107	122.309
	612.951	266.937	174.373	325.367	256.557	435.821	351.039	377.795	382.351	328.421	284.5	158.82	132.513	93.6316	125.915	175.379	239.47	289.5	189.197	242.927	227.846	413.051	333.271	88.65	97.9342	190.812	232.092	120.417
	520.593	223.212	118.934	243.342	190.74	479.592	552.395	311.897	608.545	375.714	235.857	145.712	140.73	100.969	114.222	173.681	42.4423	136.571	249.164	226.844	189.803	454.165	392.56	120.894	115.238	162.316	247.828	116.987
	310.586	203.416	229.754	256.18	111.017	562.657	111.231	421.405	112.238	386.268	410.065	185.647	189.556	87.5714	94.7581	162.982	45.4035	354.044	174.065	234.151	162.592	402.427	363.077	202.657	87.2571	173.646	226.662	119.77
	528.761	258.384	167.845	441.256	164.103	550.559	139.969	367.125	200.58	451.603	237.486	183.149	172.5	108.2	130.829	255.108	72.8406	282.73	210.661	247.077	424.269	583.569	420.875	110.507	114.53	167.562	265.316	114.877
	693.029	230.151	117.772	275.474	110.905	457.129	526.835	375.308	444.892	411.155	276.867	181.987	159.203	97.6207	102.74	279.611	63.2817	241.175	169.153	232.507	426	453.13	381.81	212.949	129.672	189.461	240.5	120.861
	493.862	237.735	101.554	257.014	167.947	475.45	281.603	383.534	306.254	392.016	216.534	206.156	170.522	113.842	126.266	235.136	56.5676	173.09	291.397	96.9444	363.077	334.373	500.052	219.5	101.613	144.552	244.526	100.208
	252.835	244.75	96.6232	276.786	176.273	393.775	236.95	336.089	459.516	299.279	284.892	159.194	156.441	94.4638	135.681	267.806	59.1039	260.296	282.375	154.623	166.783	590.183	307.732	227.338	91.1538	194.069	251.211	119.852
	587.459	232.038	152.63	282.644	170.08	559.121	173.984	307.897	435.227	383.075	310.895	153.867	185.313	111.494	124.297	343.012	66.9286	323.655	248.47	234.671	195.908	472.119	346.329	221.365	120.722	319.319	240.4	115.429
	470.31	248.045	193.527	333.486	85.1803	574.81	310.535	338.75	385.893	381.1	298.12	132.414	165.671	98.4167	112.791	229.806	153.391	232.857	228.328	230.864	196.516	471.797	417.808	252.333	122.707	147.136	277.729	98.9041
	158.295	180.231	226.986	248	135.474	519.961	98.2055	341.456	499.823	358.053	322.607	161.817	142.351	107.11	112.278	233.816	184.971	170.449	230.803	182.292	145.271	482.032	316.534	90.3714	90.4571	250.833	289.09	115.263
	238.63	304.264	106.9	225.907	118.738	514.935	271.324	393.38	421.538	334.514	354.662	165.14	177.397	108.896	117.851	289.354	187.766	332.883	220.987	244.722	212.571	390.258	430.536	181.661	109.636	172.714	233.944	106.262
	167.596	243.425	188.2	249.139	141.539	141.423	232.224	369.423	506.38	529.905	298.59	138.014	149.796	106.162	125.786	388.392	269.7	249.563	137.263	222.563	377.487	375.656	442	206.483	104.899	210.486	255.638	94.2162
	281.609	267.671	37.2466	278.641	157.373	102.017	193.931	317.693	600.107	395.196	298.25	184.133	173.768	122.303	122.303	227.131	150.014	287.571	253.377	203	320.477	348.5	589.434	182.775	97.1818	180.663	233.654	99.2609
	175.743	292.456	259.852	234.185	89.5507	399.986	253.611	372.358	246.074	326.062	264.607	165.267	160.269	84.5833	135.113	150.019	255.083	235.366	192.731	223.292	308.054	381.121	347.899	236.806	103.05	255.56	225.238	85.0822
	142	284.413	217.13	266.808	109.347	261.464	159.321	317.667	392.712	416.967	283.013	161.908	164.214	94.1714	139.093	241.5	237.342	281.429	269.055	226.203	373.014	577.525	404.472	211.961	105.455	157.538	249.909	98.9306
	171.19	261.197	285.375	230.709	195.688	118.691	185.171	325.565	217.244	363.159	286.135	174.262	178.508	91.8784	125.279	172.809	282.353	295.564	172.542	208.723	207.413	421.408	358.431	211.047	118.712	174.5	231.557	119.449
	276.761	268.448	142.603	285.808	283.842	438.595	271.831	395.881	447.581	309.925	239.986	153.2	155.773	111.982	136.658	274.531	215	247.5	232.209	246.608	109.582	486.864	270.622	195.795	117.633	194.015	264.598	115.917
	112.877	254.732	295.587	275.712	192.653	498.471	106.969	290.356	397.899	413.47	465.328	155.948	131.273	93.3913	101.605	306.611	322.214	224.939	250.266	224.089	186.865	494.305	272.072	163.5	103.154	325.098	274.047	126.625
	60.4	215.853	179.633	246.105	164.519	562.2	238.316	385.456	588.868	394.672	238.342	172.643	128.19	102.899	151.276	303.561	227.26	293.429	201.344	192.132	115.507	363.4	415.779	148.096	114.818	196.053	262.905	80.9412
	104.526	234.5	253.127	318.6	287	465.25	143.203	401.929	393.831	428.672	307.25	167.283	139.031	82.2432	138.3	240.936	233.719	243.681	144.705	182.133	411.069	121.481	321.825	163.013	103.286	168.186	285.9	111.467
	394.355	233.254	158.385	264.431	149.557	409.985	211.971	274.879	455.868	313.75	210.339	166	148.322	102.077	110.095	284.795	254.922	216.179	155.35	191.181	338.158	411.333	396.756	196.647	94	193.625	269.169	115.75
	201.167	244.164	157.453	232.813	165.922	557.15	210.333	289.986	449.18	380.355	288.104	147.459	163.645	113.068	143.066	242.77	190.688	305.517	190.136	194.923	376.934	570.521	534.708	216.673	107.812	407.818	288.051	100.438
	361.614	252.299	320.457	236.044	311.703	537.783	302.729	329.649	353.763	204.773	256.947	164.661	144.053	88.4407	137.816	234.55	421.27	282.472	266.25	218.817	322.246	527.526	425.292	165.036	113.222	185.641	258.236	92.1053
	206.895	239.646	291.538	256.323	265.982	482.813	220.101	357.097	423.762	352.5	354.772	175.869	167.482	105.714	117.236	308.797	179.352	291.211	180.925	235.4	260.919	512.45	349.296	172.155	114.689	293.484	206.93	113.179
	168.836	229.109	442.775	404.711	131.828	443.603	238.949	408.513	481.897	270.397	340.897	157.836	154.136	104.137	109.985	300.638	169.949	221.125	200.781	204.321	303.459	313.971	438.347	221.298	89.3214	176.206	211.527	113.342
	201.388	304.29	134.677	270.081	224.987	430.288	241.188	378.947	368.351	341.582	360.757	190.933	167.333	93.6667	130.851	222.558	221.247	229.306	192.765	200.756	103.348	435.688	503.833	178.623	110.316	227.903	236.288	102.893
	134	228.617	461.4	334.306	175.147	323.365	321.914	332.967	347.7	394.643	255.118	161.3	178.949	88.5616	111.648	243.167	174.564	244.584	246.868	222.263	483.221	373.438	480.776	192.487	90.6	166.317	241.097	93.589
	161	278.78	227.049	355.716	280.06	273.667	279.813	307.355	83.5362	295.41	302.025	191.857	142	135.554	124.081	246.19	185.342	274.114	263.633	222.206	325.135	492.113	454.714	157.089	106.364	121.125	242.738	102.162
	165.192	264.756	149.667	352.8	143.5	444.121	201.595	310.756	38.2368	228.779	345.689	165.949	171.393	102.949	134.48	262.171	321.068	214.55	199.216	281.4	329.373	496.468	361.795	167.697	86.8406	230.618	276.959	102.229
	144.891	211.808	285.985	259.746	312.957	493.908	253.667	322.051	273.037	403.046	345.932	177.95	145.275	87.3151	97.4286	261.836	275.045	288.559	213.905	205.5	131.61	509.125	805.574	143.333	96.9726	203.227	285.013	101.823
	140.095	270.509	124.429	344.632	125.286	419.3	210.129	373.31	269.831	361.803	344.768	179.696	157.228	118.2	117.113	298.129	165.831	229.353	237.825	209.152	150.548	606.951	717.896	195.056	127.04	245.145	274.487	87.7051
	126.764	251.698	127.278	330.527	163.08	516.296	263.765	278	273.826	291.446	451.136	159.268	157.702	106.161	125.851	249.117	296.13	268.024	161.222	245.213	477.866	468.683	618.15	41.25	112.87	216.987	285.269	98.3621
	118.895	289.532	236.609	348.449	118.852	299.143	250.902	286.321	414.895	428.889	409.147	176.434	165.026	114.986	100.578	250.667	282.233	262.015	213.744	165.987	327.568	366.212	512.695	120.63	120.586	340.2	272.182	121.786
	107.075	263.31	223.97	384.869	295.087	603.828	325.761	295.078	205.315	360.577	244.935	193.169	152.815	116.114	139.818	216.069	216.182	275.115	223.262	190.684	90.519	374.141	554.519	197.559	114.816	304.708	252.13	115.288
	102.966	219.319	229.85	323.059	161.846	582.985	239.785	294.467	266.467	382.2	245.493	156.773	175.113	114.868	130.446	245.943	167.855	442.885	232.459	251.633	85.7568	378.727	135.37	103.492	101.987	201.278	283.926	97.7632
	146.25	248.216	159.271	381.788	140.452	243.319	270.176	280.125	434.379	372.623	283.103	146.178	158.444	94.1452	124.104	265.661	180	209.017	219.845	168.135	308.705	543.433	522.958	99.1356	114.772	323.286	258.043	105.947
	107	236.017	292.019	346.345	331.405	505.152	193.639	370.758	347.961	423.111	272.652	179.896	172.672	105.719	141.612	200.768	187.364	308.625	197.225	167.243	362.908	437.321	414.759	103.175	109.309	195.246	258.928	104.321
	125.794	255.256	115.242	368.645	136.203	420	255.188	379.948	430.93	371.26	344.059	168.552	155.73	101.5	106.461	254.65	179.738	254.45	211.167	231.788	337.913	418.542	296.164	94.5479	110.784	300.688	225.195	109.205
	126.885	247	136.661	392.323	169.581	407.59	189.934	281.716	259.653	408.213	401.768	157.833	203.045	93.7692	111.658	261.353	252.187	264.088	260.698	192.968	399.346	452.241	487.462	97.7324	130.59	259.301	236.25	91.8831
	140.391	219.544	106.75	256.934	125.554	487.191	211.065	306.03	284.813	307.905	327.696	163.23	283.653	91.4138	119.056	257.88	265.079	268.344	177.405	237.672	144.015	538.691	399.355	113.343	106.836	271.516	244.197	108.961
	144.059	219.169	116.364	251	118.632	472.983	170.441	373.737	169.877	394.058	452.5	156.369	169.552	116.655	97.4848	228.143	222.385	265.944	222.625	193.3	464.629	556.267	343.984	109.694	106.739	317.329	228.613	97.6234
	130.188	250.279	118.358	364.063	164.061	332.2	297.169	365.563	257.797	456.136	532.774	191.729	155.667	119.118	129.702	226.644	211.857	278.532	138.147	197.107	295.652	563.351	333.042	343.013	109.575	353.323	252.585	93.2237
	120.197	235.625	126.686	322.063	129.178	485.014	185.771	366.023	408.528	327.141	252.448	164.31	148.634	107.067	120.333	258.707	91.069	249.738	135.284	168.681	282.111	464.563	856.531	255.138	110.532	331.154	243.134	121.712
	135.688	192.23	92.7391	364.139	38.5556	499.325	216.014	357.974	369.277	421.873	246.463	171.769	170.101	93.2532	137.606	225.014	81.7821	283.19	199.312	185.349	323.185	448.753	253.46	110.543	99.5143	253.623	201.662	94.9
	122.013	257.658	115.133	416.446	293.071	362.5	228.882	367.741	344.32	292.6	363.701	166.986	167.733	89.96	119.945	239.567	234.208	273.723	196.702	197.16	437.092	448.616	514.527	300.985	115.06	253.971	208.129	100.051
	122.48	245.8	120.693	309.5	203.329	452.539	213.841	320.944	288.742	440.301	241.712	123.125	168.592	95.9565	111.27	155.645	242.316	179.709	272.614	208.013	352.72	438.676	472.896	362.732	100.737	224.91	259.469	126.07
	115.563	214	126.442	359.455	190.889	518.13	209.063	384.658	199.438	397.864	293.052	141.349	176.873	92.4054	140.286	140.325	240.918	180.324	216.569	204.571	315.78	495.32	417.206	250.408	182.519	187.831	248.333	94.0746
	144.243	214.113	93.8308	337.26	151.416	344.433	224.076	327.772	447.566	362.987	291.359	171.682	162.541	97.1711	110.652	137.735	238.784	239.27	154.403	198.476	423.15	354.364	514.932	144.179	103.923	159.606	247.587	108.672
	127.725	248.353	102.067	361.26	213.623	307.262	426.631	285	318.211	472.536	347.824	177.692	148.089	115.155	130.974	166.444	144.025	267.221	187.441	198.643	181.203	500.641	336.507	246.817	111.652	300.74	304.319	103.948
	122.098	242.492	132.246	249.507	201.209	400.244	160.156	314.071	432.909	460.73	327.585	187.658	158.328	112.478	108.871	147.63	190.534	244.622	221.267	205.188	318.709	484.97	427.544	182.873	119.583	185.899	264.904	113.05
	144.486	250.029	130.365	308.855	115.836	538.708	257.377	307.468	324.764	365.183	425.708	165.763	155.653	98.0597	119.323	114.044	204.123	158.246	260.485	201.356	307.671	341.15	409.864	279.714	103.483	335.632	228.014	121.013
	119.405	240.466	111.754	279.178	94.9467	500.167	319.257	246.988	110.449	363.052	466.838	154.582	168.353	101.912	132.301	143.414	158.417	241.425	198.442	244.822	380.321	357.984	345.768	215.027	98.7813	288.203	261.247	114.564
	122.815	261.211	115.903	294.306	263.414	300.311	223.883	286.8	501.54	320.531	289.936	168.646	162.699	100.603	115.513	168.716	172.077	218.416	134.455	265.931	324.782	402.735	403.615	232.71	100.678	304.515	252.897	109.561
	118.653	212.418	111.919	326.561	190.9	463	188.219	302.526	241.899	403.294	276.435	178.333	171.81	99.2051	108.681	264.429	263.947	273.64	217.461	172.286	295.662	644.671	337.915	189.745	109.639	189.758	265.385	101.26
	141.987	283.542	124.338	371.646	194.308	198.382	354.274	343.91	222.105	280.852	269.772	157.645	174.197	111.81	109.958	252.596	233.078	264.9	209.689	204.975	284.483	709.25	361.282	329.804	152.103	173.052	264.514	105.184
	139.846	287.321	103.638	273.509	306.422	278.196	203.311	287.714	292.656	524.966	386.829	146.723	160.462	94.2963	127.816	151.833	196.158	295.947	187.921	241.165	281.373	536.2	356.486	234.575	110.597	217.081	262.231	113.017
	126.605	219.691	117.672	291.081	411.278	358.753	185.462	346.85	272.723	324.071	271.658	160.123	158.747	115.662	132.225	148.309	271.5	193.5	244.303	198.387	309.901	644.386	404.512	211.662	132.962	285.321	243.403	93.8448
	136.176	243.532	103.083	292.149	457.652	461.792	236.786	329.737	337.823	351.225	316.507	156.353	156.974	118.197	113.05	237.435	128.196	168.211	148.685	170.679	185.658	506.309	274.212	228.103	95.0667	199.987	205.456	97.4615
	136	289.234	106.768	355.9	331.063	302.5	214.447	335.86	299.672	308.113	331	153.644	171.891	84.5231	134.061	211.688	257.971	241.466	194.908	165.279	261.096	467.788	930.671	227.212	115.948	287.709	240.644	105.429
	137.625	229.81	112.758	311.197	175.656	552.018	232.705	220.413	315.408	397.264	341.857	181.294	172.266	98.0339	125.603	154.031	252.605	60.4921	172.329	184.557	132.073	329.338	345.403	357.753	89.614	176.277	216.182	88.0167
	139.884	258.393	126.513	322.065	418.175	425.151	302.233	304.234	338.434	435.298	384.308	178.691	153.271	104.814	113.705	149.8	250.855	175.823	211.922	229.735	156.971	598.646	371.354	222.429	109.81	274.987	40.1449	82.2742
	153.859	235.773	107.493	399.844	332.625	349.557	212.625	292.926	368.983	314.593	375.925	167.986	178.795	110.509	98.5641	141.891	149.557	189.362	255.846	220.583	137.152	356.811	421.458	208.538	90.8	237.569	278.547	112.712
	135.972	271.853	133.028	415.825	329.893	380.246	387.257	255.9	95.6053	460.214	280.491	191.837	165.842	122.282	122.176	291.077	216.574	45.2712	213.105	194.923	182.085	513.803	547.764	205.937	124.697	169.461	209.342	106.362
	128.075	233.972	113.532	263.508	118.75	512.982	235.145	325.103	281.623	560.815	555.72	195.857	154.943	90.322	136.069	313.848	228.813	49.8393	236.681	168.034	187.234	303.667	256.392	195.083	119	268.479	232.014	120.237
	126.103	243.047	117	237.838	377.917	336.047	191.382	356.873	322.111	374.125	311.76	168.553	139.206	105.07	124.891	139.944	191.368	59.5231	258.128	197.015	107.985	359.522	421.4	240.6	99.013	96.5405	240.867	108.718
	113.179	370.175	107.241	278.418	353.456	405.944	178.395	328.529	391.063	464.859	353.208	157.671	164.333	104.41	125.844	166.639	263.16	80.7297	234.329	180.452	86.1159	522.128	579.58	194.844	102.919	172.823	230.087	98.1746
	118.974	308.074	130.583	252.244	451.176	499.308	176.91	281.587	336.213	397.68	248.975	180.407	171.417	112.185	123.911	261.203	206.423	251.321	231.267	198.595	92.0135	577.569	652.279	186.121	111.581	402.018	239.932	116
	110.076	339.486	118.403	510.543	389.208	374.406	161.729	365.862	254.5	348.739	286.068	129.736	162.403	94.5313	111.485	283.254	245.507	204.886	238.242	253.791	347.692	405.208	702.158	233.531	103.282	192.45	218.603	97.4615
	124.25	310.921	136.076	578.487	372	488	226.773	309.437	360.76	341.466	270.556	156.851	184.933	83.8919	113.973	248.403	293.914	234.194	167.896	215.224	112.357	471.298	516.617	201.211	108.63	166.563	213.568	106.985
	122.982	375.6	131.309	628.4	358.392	389.897	188.5	277.1	363.788	414.311	298.443	147.662	164.792	110.375	123.215	446.775	209.088	187.467	235.729	247.417	407.684	488.776	360.422	167.958	107.922	359.319	228.785	92.5082
	126.679	495.974	122.154	641.875	84.7215	432.364	177.94	253.533	316.684	352.772	321.532	166.258	147.59	94.8684	118.111	252.291	153.829	152.892	263.075	215.053	458.629	436.127	437.849	173.756	97.3784	224.641	265.6	109.63
	108.493	513.857	103.734	380.612	146.063	540.348	279.646	259.783	327.59	269.338	541.667	161.052	158.831	130.043	128.433	266.566	161.95	260.89	187.918	169.411	100.161	482.844	385.167	208.732	98.0833	190.066	240.554	97.5479
	125.464	318.91	143.721	593.15	103.781	397.073	230.607	271.931	388.897	384.091	247.26	173.867	161.479	100.714	119.354	228.242	240.393	278.962	204.421	169.371	67.2951	567.104	537.929	214.507	110.348	292.952	202.016	83.6207
	120.603	584.267	137.148	589.339	156.38	483.603	150.437	277.962	372.883	162.429	393.597	184.8	181.114	94.8507	109.211	269.186	139.069	301.41	236.746	224.087	118.229	443.284	270.187	195.746	122.719	219.205	237.475	103.231
	125.566	273.203	126.244	532.831	154.372	546.554	212.433	376.776	226.077	473.456	614.656	152.769	178.554	102.532	101.577	127.949	185.394	162.068	269.587	212.857	365.177	636.175	312.429	187.985	143.662	171.833	280.314	90.425
	132.171	410.138	117.175	469.57	187.286	399.62	211.328	336.25	282.742	457.164	438.2	183.971	175.439	122.35	109.381	313.064	282.383	156.689	287.474	213.483	327.481	549.615	576.197	190.558	102.299	201.928	270.679	92.9231
	135.424	306.218	118.133	575.672	259.556	463.94	203.43	323.797	188.695	313.375	467.141	187.986	153.7	116.806	106.6	131.775	266.217	63.45	247.937	234.475	326.138	494.462	387.944	335.397	86.3559	247.096	246.783	96.2609
	123.776	526.115	98.2333	605.269	163.276	464.842	230.514	420.233	595.392	392.311	131.622	151.906	161.5	103.171	126.549	284.025	157.633	146.107	177.446	217.121	279.333	402	646.472	334.368	115.461	254.085	228.465	107.362
	107.065	334.538	130.145	581.232	177.119	313.266	180.983	433.453	286.962	373.154	278.692	147.97	173.72	97.6909	119.209	283.895	213.171	290.028	231.071	245.389	58.6964	466.985	698.547	200.115	98.5667	192.361	228.507	131.947
	132.855	300.806	106.479	408.263	153.797	367.931	226.688	324.052	290.458	333.284	359.378	172.03	145.256	96.5147	126.097	221.208	191.705	243.5	199.298	206.947	57.1333	485.321	427.648	179.014	124.661	201.5	263.868	116.179
	115.912	324.969	138.542	655.972	210.147	500.778	176.845	340.773	478.787	406.042	328.147	184.925	163.881	111.474	124.121	280.877	226.211	95	239.096	228.238	72.3	410.956	401.406	143.262	111.459	253.479	229.711	95.05
	121.594	420.639	116.867	556.26	142.5	389.453	238.013	283.529	498.05	746.013	400.263	164.564	149	113.239	122	262.486	244.013	218.423	212.61	211.085	70.3396	453.1	363.513	170.308	104.628	205.719	249.333	91.8831
	112.051	323.787	104.561	520.912	367.321	444.433	328.143	299.345	378.293	355.115	430.438	177.911	174.431	118.8	109.949	251.855	190.698	227.961	262.986	219.585	72.2549	253.55	373.3	146.385	95.026	171.988	279.891	104.718
	124.551	436.23	135.913	611.8	277.573	455.455	226.528	290.589	415.101	143.397	310.306	151.262	134.414	91.75	133.91	274.338	201.575	251.225	227.983	196.208	86.1356	398.627	284.578	218.128	100.74	309.267	213.829	93.2029
	123.397	449.137	129.507	571.449	181.641	436.408	435.58	335.342	135.347	342.075	323.367	177.391	175.74	105.083	137.962	222.348	146.8	100.828	178.778	254.538	97.0145	587.063	385.692	297.083	105.439	240.986	253.552	110.111
	128.081	288.776	157.264	568.708	283.096	489.534	188.183	370.442	346.475	476.776	440.424	171.054	176.633	92.9701	118.114	209.383	228.842	62.5313	210.507	246.158	49.1795	515.055	283.919	177.773	126.423	161.38	268.813	118.746
	126.203	315.393	108.342	678.571	191.672	374.793	201.439	299.455	169.983	360.883	638.372	165.679	154.143	100.729	112.922	279.108	285.644	191.077	180.368	188.404	71.4795	367.101	306.859	324.235	161.563	276.77	264.197	117.25
	133.291	288.972	135.761	592.5	152.662	269.581	131.424	294.295	331.74	244.24	302.284	161.015	139.102	86.2459	127.884	304.107	257.63	212.966	205.908	291.094	94.1324	475.267	241.2	207.467	116.391	233.809	248.63	103.644
	138.045	375.882	125.681	535.642	273.686	433.221	177.393	305.616	489.842	391.595	777.554	165.539	174.333	99.8481	130.973	300.618	213.138	56.6164	189.451	223.726	81.5763	597.804	329.63	159.222	127.597	245.314	224.622	118.987
	119.119	284.757	137.95	698.119	150.182	436.795	195.729	283.737	256.61	354.361	639.675	161.525	152.403	98.8	111.74	255.731	256.8	92.4931	215.75	219.803	80.0263	550.225	341.409	222.514	117.75	236.512	185.671	93.6232
	127.172	568.345	116.643	646.099	203.743	348.873	241.365	238.197	515.038	169.386	212.486	167.403	167.507	90.9315	132.23	326.371	233.103	262.333	219.117	256.909	49.3966	509.897	342.897	241.446	92.4237	202.957	258.921	112.92
	117.868	318.642	116.216	543.055	157.083	400.347	233.426	247.754	331.015	320.208	179.603	158.966	141.483	83.1	128.225	254.455	240.924	229.975	239.543	256.469	27.7708	441.172	264.491	196.227	91.5	289.982	178.727	93
	127.081	427.31	137.338	584.1	155.93	537.685	229.638	360.969	506.568	520.031	304.885	164.12	189.721	96.9744	118.218	283.513	200.329	301.622	233.519	220.717	52.7846	541.103	296.796	318.473	99.9079	287.025	225.127	82.5385
	136.607	532.362	122.91	302.702	249.75	359.914	227.583	325.85	194.421	468.434	220.392	183.063	172.783	102.051	115.108	241.386	214.295	40.1765	245.137	222.606	64.5536	537.338	229.745	262.034	98.8333	261.659	94.8136	119.377
	98.2586	286.707	115.686	460.246	168.923	413.788	205.548	268.85	514.21	400.508	260.847	179.068	152.827	84.9474	127.329	277.309	218.108	209.492	232.643	219.871	62.3455	462.982	351.696	168.816	94.5467	262.641	298.551	109.589
	112.649	345.338	118.725	397.617	223.238	346.987	129.821	326.052	515.691	388.632	293.579	158.934	146.348	108.575	116.103	169.364	205.638	232.301	199.276	217.9	61.6316	527.333	384.819	162.738	124.5	199	224.608	108.713
	137.48	528.333	132.667	439.829	232.033	390.812	196.614	303.737	432.883	335.759	350.645	164.357	197.118	101.966	116.559	255.236	298.169	95.5	292.015	213.811	107.814	444.058	315.733	91.2826	146.597	197.514	252	96.3182
	106.547	507.15	138.152	526.203	331.284	473.734	188.731	285.58	329.049	436.857	338.519	174.614	136.486	104.481	116.31	263.87	216.862	81.3939	279.242	202.132	49.8077	368.908	308.557	115.527	133.113	162.042	258.183	87.4459
	132.119	283.732	99.5143	500.354	240.554	327.573	301.514	286.899	163.507	480.135	313.783	189.165	176.662	88.8889	108.416	220.088	238.051	81.0606	159.536	193.986	112.453	326.033	192.681	116.87	99.4304	316.607	218.365	107.853
	140.057	254.051	105.039	337.172	205.859	403.825	210.658	240.781	366.03	178.078	291.684	176.809	181.351	88.8481	115.203	216.873	318.766	185.273	236.078	192	38.5538	345.866	355.417	110.754	126.055	211.508	217.115	99.4203
	138.091	607.311	112.65	309.772	119.358	402.757	193.775	344.912	641.301	296.662	407.041	160.23	161.697	100.167	107.712	252.949	179.341	180.473	259.049	215.23	54.9714	475.244	426.123	102.885	113.315	221.533	236.5	105.85
	122	282.254	92.8714	591.014	188.632	409.069	146.221	332.316	454.338	506.983	294.443	161.906	205.948	98.5128	131.026	316.658	271.194	186.507	237.296	313.117	62.6842	337.086	284.208	239.4	108.789	213.848	201.818	100.228
	125.829	295.13	115.776	627.68	330.269	423.667	184.554	295.795	403.86	466.618	342.785	180.925	183.329	107.431	109.217	294.276	200.128	283.825	213.58	223.836	105.647	376.655	409.667	118.566	110.185	219.587	196.047	99.2623
	124.507	361.424	138.827	565.975	176.867	451.885	257.548	355.246	250.657	425.127	349.347	147.712	172	61.4507	132.849	251.986	249.079	205	226.615	213	55.9577	396.93	298.429	239.61	114.662	192.45	75.3684	87.557
	113.016	489.456	126.32	348.841	285.583	488.522	231.316	347.679	402.163	217.59	410.366	148.633	153.69	89.2222	102.208	297.582	212.253	302.436	221.831	205.078	165.553	508.969	318.926	235.753	101.216	124.605	43.9077	106.681
	108.103	324.722	121.667	663.927	313.816	402.351	165.339	370.206	501.917	408.471	239.513	162.719	184.831	103.1	114.079	131.182	247.367	241.359	246.861	218.545	77.3148	413.671	344	202.692	96.425	122.1	198.636	117.582
	169.329	291.885	125.316	551.354	212.654	337.329	229.397	276.357	479.203	469.853	229.487	145.692	155.686	87.2933	130.6	129.718	193.313	240.269	191	210.015	76.017	428.842	303.306	359.305	128.242	331.833	209.508	106.338
	108.92	302.186	107.924	634.861	307.139	324.475	148.174	363.474	596.425	541.754	238.057	140.387	155.054	95.6271	115.743	126.671	275.646	190.925	201.13	204.732	79.7308	527.805	323.181	217.833	113.115	156.364	240.789	95.1194
	145.421	306.677	102.5	527.406	216.493	391.017	249.812	297.556	549.907	407.083	393.325	161.915	187.099	107.986	122.955	112.966	244.026	260.526	240.757	198.842	38.7833	476.354	366.2	221.589	125.131	215.64	212.297	108.486
	150.293	419.03	113.147	639.167	187.515	428.641	279.486	237.299	334.746	512.21	437.841	150.847	174.042	83.0476	119.645	120.797	215.189	172.956	217.522	214.632	32.8194	222.71	291.983	180.618	136.879	270.347	167.311	97.5069
	132.329	284.192	118.528	633.828	165.841	352.835	203.178	258.371	257.836	524.056	285.884	146.776	142.765	93.1948	122.557	247.721	223.186	278.458	307.61	183.945	44.375	442.625	274.618	206.311	105.297	229.643	238.93	94.5916
	128.77	265	129.448	405.947	242.104	405.651	286.974	221.574	463.074	460.281	281.179	161.492	172.457	117.463	120.723	250.571	245	237.618	248.056	212.171	157.373	454.941	420.217	164.164	97.8939	230.238	240.806	83.0303
	123.889	286.551	105.392	357.294	350.883	349.494	272.917	257.793	386.042	487.985	224.684	144.228	167	89.7936	103.846	274.741	173.609	261.329	214.106	183.313	143	547.213	276.568	260.881	114.056	182.803	225.354	105.903
	130.738	287.74	124.234	427.484	207.436	348.652	227.765	228.783	606.361	544.88	277.94	145.983	169.853	100.442	109.926	100.314	160.9	235.046	289.649	183.785	302.888	495.203	425.135	159.937	115.829	171.224	205.456	112.986
	116.215	298.542	122.397	654.829	245.423	360.426	169.125	248.034	605.224	219.338	361.541	209.457	169.968	96.6094	144.935	78.7966	301.451	312.661	248.103	221.43	260	530.136	479.984	161.899	135.266	211.551	197.811	91.9
	121.855	291.357	129.29	780.673	278.517	458.345	153.944	417.735	537.983	308.063	287.646	78.1864	192.034	104.246	115.425	202.7	205.75	259.301	225.853	184.986	271.627	396.778	280.654	104.743	127.355	169.708	220.064	116.446
	101.586	556.351	129.731	298.265	152.613	367.103	213.667	318.768	602.534	434.486	361.452	156.049	194.104	117.015	123.125	204.431	65.6111	260.95	199.288	197.724	318.125	380.069	391.132	79.5424	113.15	179.59	59.8462	94.0519
	122.644	303.817	98.1282	447.591	310.795	444.816	195.017	219.552	543.684	537.408	310.779	151.606	137.237	93.2295	122.014	200.883	69.4533	235.288	234.986	293.865	412.214	508.35	325.078	105.697	108.632	154.64	209.233	95.5882
	123.587	499.05	127.862	528.238	311	419	220.891	283.965	551.519	524.211	249.923	177.462	152.81	101.14	122.018	228.242	77.4079	263.731	198.853	224.237	107.563	397.205	315.091	104.932	95.0267	144.078	240.721	87.7015
	103.771	309.519	98.4177	656.926	206.141	392.203	203.988	312.247	235.738	454.785	414.5	156.634	163.464	114.724	130.75	213.971	57.3729	166.933	215.578	252.352	309.288	251.169	383.934	99.7059	124.481	283.809	231.185	103.627
	114.607	336.431	123.105	555.327	194.456	601.197	325.696	252.113	72.0704	469.015	425.049	152.872	149.623	100.506	122.413	236.211	41.4416	187.966	191.57	181.961	47.4595	496.481	304.987	178.937	95.5256	170.333	194.961	98.7895
	111.836	341.571	100.194	559.056	318.552	314.633	257.424	244.788	116.5	403.634	374.25	139.27	148.583	86.2931	115.269	204.8	67.4211	230.392	170.026	187.75	412.766	443.853	308	220.7	137.32	260.621	280.056	99.2609
	137.647	350.75	130.262	605.431	255.582	374.532	257.873	279	300.844	319.829	321.309	182.986	149.103	85.8986	105.78	234.844	52.9322	212.263	177.983	220.797	284.148	336.792	360.877	185.563	139.782	267.461	224.906	122.987
	126.829	357.076	109.1	680.516	207.813	158.306	194.387	289.281	118.456	423.967	347.714	163.333	157.973	108.738	125.171	160.053	48.9273	296.506	185.5	209.568	366.64	459.831	297.085	327.244	107.596	257.263	224.069	93.4462
	134.828	306.145	105.574	527.739	297.034	164.366	215.051	304.212	96.2857	435.475	287.705	184.779	162.913	88.2338	120.253	236.577	65.1014	238.548	204.488	164.211	321.414	253.205	337.829	187.981	104.5	175.829	245.8	99.2576
	120.948	305.354	97.3934	500.06	340.919	168.018	267.846	221.026	240.569	214.743	347.31	165.121	141.554	97.6	108.086	229.525	183.771	179.919	158.967	204.246	277.684	489.106	355.254	174.536	106.092	192.282	204.101	109.355
	113.4	309.743	124.662	440.658	249.515	128.453	190.741	240.935	259.063	551.309	365.813	146.855	157.155	91.481	104.912	208.609	162.507	135.671	154.964	224.987	304.437	413.017	433.329	198.886	95.3538	132.647	230.638	90.3421
	130.238	293.064	109.343	595.932	153.228	517.722	217.103	218.816	286.291	336.355	297.143	136.253	175.925	102.815	109.286	289.025	161.855	138.983	212.543	246.967	209.714	461.986	350.887	171.364	115.4	196.97	233.148	98.6229
	128.75	327.732	104.638	566.441	120.861	428.483	194.414	343.875	333.111	526.182	345.769	157.795	182.647	113.696	124.716	223.868	147.294	138.197	219.638	218.522	207.426	468.525	259.508	184.696	110.059	232.129	210.821	125.855
	88.2985	423.389	129.985	566.812	129.041	439.517	163.667	353.672	186.962	448.704	432.153	164.493	143.525	82.7941	140.068	226.211	184.311	153.653	252.262	202.431	227.526	419.857	329.557	170.709	94.8246	208.238	208.481	95.4545
	131.029	351.35	128.866	500.966	120.81	430.722	179.615	274.805	325.419	460.654	462.443	154.5	156.938	99.3077	110.177	208.908	184.406	151.965	218.415	206.27	284.224	526.945	275.831	273.352	114.931	264.284	234.678	106.536
	122.704	492.892	106.692	542.239	178.345	463.862	166.848	278.082	355.795	223.696	332.958	162.522	169.177	106.211	134.275	226.386	360.469	152.474	196.243	220.627	280.116	593.829	261.276	102.222	120.822	165.368	230.328	100.215
	115.377	291.018	117.789	490.3	178.263	448.716	217.985	259.566	312.683	536.372	337.917	161.19	162.75	94.1818	120.575	237.013	177.814	150.423	224.845	175.781	188.494	486.038	273.215	270.773	113.328	156.841	233.42	92.6184
	122	288.759	115.795	433.153	149.895	522.987	192.026	244.587	56.0128	599.063	386.584	154.972	166.164	108.167	121.675	278.342	157.68	238.53	144.662	203.595	251.017	563.662	235.026	86.8571	108.37	228.943	265.027	98.2667
	108.7	290.5	97.0779	548.431	178.767	483.485	221.828	253.065	181.013	482.174	345.231	170.111	140.246	113.817	118.217	218.868	223.62	109.234	249.408	177.573	311.59	406.883	290.344	337.719	134.281	440.487	239.319	101.526
	111.682	286.442	130.831	638.538	170.957	533.217	184.795	262.635	275.345	511.145	390.018	161.857	130.881	111.757	128.525	204.953	155	73.3167	222.291	215.566	304.592	398.115	226.779	96.8429	123.582	233.05	210.639	91.9146
	103.45	291.328	115.167	639.038	141.382	117.321	160.405	230.45	133	525.169	341.746	154.525	171.792	88.0492	106.836	205.294	272.907	102.962	233.675	120.64	170.233	424.561	405.475	218.153	103.243	231.685	212.43	113.757
	123.155	298.787	140.288	577.652	146.544	136.25	166.015	267.712	306.051	386.77	356.623	153.5	152.353	95.0333	97	224.137	161.862	226.342	285.322	180.375	168.118	414.492	340.111	111.912	147.303	210.25	270	122.986
	133.069	343.641	117.463	514.121	157.947	601.375	228.154	320.922	301.679	263.395	279.934	200.687	152.033	132.068	114.817	209.914	320.239	265.042	242.282	210.438	171.986	583.681	344.671	122.266	106.085	217.597	244.4	88.6912
	116.483	551	134.847	370.31	107.387	273.922	284.411	276.534	242.615	400.162	350.342	164.419	198.986	110.595	96.8718	224.868	206.941	214.453	210.333	183.862	169.787	401.235	225.241	268.714	114.368	190.492	264.343	108.569
	115.477	332.792	132.816	517.036	122.655	294.639	211.857	395.585	143.633	178.263	439.571	188.792	147.129	99.6714	140.145	239.922	270.761	211.26	208.325	174.559	183.116	382.307	434.881	210.188	117.762	186.29	220.232	91.5385
	125.5	333.029	126.441	505.236	95	440.743	163.273	324.974	291.136	469.785	456.838	160.38	160.269	102.025	123.235	227.806	151.028	219.88	191.212	244.569	173.407	485.912	289.392	152.576	105.152	133.207	258.833	103.708
	101.465	316.292	132.841	420.886	138.443	504.789	214.559	268.328	334.59	364.458	487.859	157.278	151.817	112.615	99.6452	232.377	291.114	282.143	236.824	224.554	143.691	470.827	311.696	217.985	104.323	133.797	219.622	104.875
	138.393	442.132	98.65	602.623	141.469	124.185	153.156	267.451	167.712	345.5	433.803	153.286	156.405	98.7183	100.725	223.949	247	225.337	203.705	209	358.508	448.015	250.53	210.083	112.7	173.541	248.158	100.109
	103.705	291.269	123.711	295.461	168.232	373.475	199.07	346.379	219.158	420.308	396.581	145.614	126.169	101.416	103.87	220.567	215.538	264.468	237.606	229.113	210.984	473.134	282.696	91.6721	126.684	137.444	255.89	103.474
	130.938	292.135	95.6901	593.864	114.986	657.78	151.06	235.484	422.132	475.279	312.443	189.944	148.2	126.615	109.246	186.583	246.281	252.339	193.47	223.647	335.893	514.536	285.165	182.242	124.947	112.708	280.6	121.509
	113.072	285.704	121.947	673.872	122.474	455.443	185.029	342.418	138.292	490.544	258.892	167.926	163.433	86.4328	108.145	202.4	213.392	252.826	239.508	192.5	374.731	503.027	344.581	150.789	130.293	132.647	267	104.413
	141.896	254.2	141.971	529.77	120.115	488.644	169.735	410.394	401.658	541.284	351.896	162.233	147.458	105.481	109.278	196.014	220.513	150.086	240.048	189.382	395.811	99.5672	355.291	162.667	133.045	258.486	233.867	93.3623
	127.453	602.754	124.679	593.026	146.548	51.1571	209.923	402.429	263	321.732	242.153	161.275	171.868	89.3623	120.857	197.054	240.738	243.657	175.194	199.169	110.474	589.293	347.718	202.731	118.426	130.918	270.182	112.392
	95.0328	308.722	105.192	349.676	146.794	54.8571	177.048	365.518	185.623	454.928	321.603	184.153	154.831	94.9	110.552	215.711	252.556	275.103	212.784	197.026	234.542	581.242	332.808	158.593	110.345	197.905	219.338	95.3115
	130.948	422.143	101.526	461.859	125.224	106.536	122.7	323.325	517.175	395.943	333.758	164.587	152.69	107.898	132.392	242.623	217.107	258.097	201.57	175.103	422.514	351.492	269.241	203.525	124.545	229.787	219.453	91.9672
	139.756	300.414	118.5	428.13	133.31	62.0656	213.429	408.275	204.805	395.662	250.236	144.421	286.58	105.935	118.711	176.595	397.311	234.473	174.463	216.815	247.175	481.063	343.789	90.1067	94.175	202.049	199.961	83.3205
	142.367	266.348	115.239	554.718	139.359	61.1795	165.672	329.508	454.6	406.026	418.782	169.824	142.316	112.581	108.464	205.464	171.641	222.679	149.574	244.96	368.939	494.481	340.108	184.629	115.055	133.846	230.75	112.103
	110.508	653.773	99.9153	475.264	118.375	58.5357	213.085	322.22	399.75	479.939	316.519	173.431	138.355	116.964	124.776	276.603	358.597	206.792	212.636	212.987	340.292	528.095	348.5	184.568	119.658	196.784	220.906	106.613
	110.632	289.712	125.521	608.31	137.983	102.143	197.438	350.915	455.443	649.333	449.597	186.727	138.568	115.213	115.382	232.988	232.352	253.125	199.352	210.487	300.6	442.808	372.855	281.433	139.712	212.548	268.094	99.0921
	129.613	284.68	107.215	352.274	101.408	96.4167	178.943	329.687	197.348	440.8	247.985	162.75	133.323	110.038	108.658	249.623	270.456	230.883	232.697	201.257	475.278	510.983	394.571	184.987	96.1571	161.787	211.623	92.5932
	123.885	512.767	102.712	582.852	91.7377	121.404	161.681	387.388	412.684	599.257	449.662	182.915	176.879	90.9315	123.487	265.1	173.855	239.123	142.121	182.827	347.359	348.361	432.544	124.324	122.841	180.314	261.686	106.96
	142.985	317.033	118.19	677.7	135.233	139.732	175.29	316.089	287.868	517.032	354.486	185.58	154.962	129.929	117.114	231.263	161.368	172	198.509	224.086	339.825	458.286	372.39	218.584	109.867	138.841	238.254	105.312
	130.964	280.679	95.8305	548.724	108.127	89	243.342	313.426	538.561	379.412	452	191.133	150.22	100.653	123.559	207.292	223.042	268.246	205.684	198.026	232.633	471	326.064	186.721	113.344	298.39	215.547	97.2603
	123.276	618.385	94	470.153	142.284	115.759	228.556	331.842	591.718	586	428.167	234.433	158.545	112.033	117.581	191.948	174.972	217.722	151.862	227.898	338.121	423.359	303.643	194.188	115.343	221.125	30.6818	99.6111
	142.5	304.324	163.814	391.327	142.582	140.055	125.58	282.918	137.767	493.808	340.026	158.522	193.117	100.815	104.735	206.754	191.293	211.52	215.125	212.404	376.949	386.74	318.467	212.985	112.645	154.397	205.925	90.1538
	114.762	598.215	116.361	491.013	130.038	139.836	163.737	298.246	257.759	469.55	288.424	173.232	172.224	95.5	131.162	206.7	79.8382	212.871	213.403	208.712	216.308	301.162	290.103	160.014	111.507	252.625	207.386	100.654
	128.2	250.645	155.333	539.593	128.348	154.933	121.038	362.29	522.658	463.447	323.623	148.037	162.121	94.1463	137.827	191.318	82.8507	199.315	231.75	266.733	311.183	453	336.241	186.556	136.071	490.339	277.735	107.729
	120.11	295.614	130.354	523.194	117.297	134.962	160.515	356.622	571.5	506.887	327.125	199.737	162.721	93.7206	105.575	216.147	186.325	291.962	235.239	200.558	204	427.986	374.519	196.182	111.176	209.017	266.442	80.9178
	152.789	593.962	141.194	560.563	109.563	152.447	198.281	410.971	409.474	573.92	228.347	168.262	161.028	94.9394	110.449	250.987	173.794	250.633	214.622	213.308	262.212	415.4	289.419	166.541	122.416	205.443	271.375	106.382
	133.662	272.732	151.625	506.462	142.446	123	158.519	246.714	461.672	499.195	274.487	164.361	154.4	104.254	116.359	198.48	166.172	250.26	158.045	165.986	270.123	270.833	367.568	199.096	98.1711	244.513	213.583	100.734
	132.268	319.947	129.361	368.388	142.361	69.2308	141.886	340.679	433.605	458.627	514.115	164.545	153.27	109.405	114.897	183.389	78.803	152.625	210.277	153.304	385.586	453.333	293.406	190.014	133.65	261.491	247.026	93.675
	126.229	311.605	113.557	517.622	102.958	72.1111	240.408	426.093	339.761	557.683	492.089	164.176	142.5	117.721	131.153	189.563	165.9	248.297	221.984	237.333	257.031	611.833	300.783	177.671	102.217	195.119	213.567	99.9103
	117.61	261.513	100.831	468.831	155.8	69.9683	137.181	385.075	420.412	343.677	434.672	181.173	168.014	111.366	112.158	184.211	164.915	248.533	248.855	210.923	190.512	579.386	357.493	167.833	111.387	173.413	271.851	94.9474
	135.143	521.029	140.188	492.558	139.254	121.773	292.027	249.267	256.21	284.972	566.112	172.394	176.859	111.773	111.9	233.101	285.77	247.584	211.741	235.182	307.371	369.4	394.765	210.606	85.8919	196.514	223.042	119.432
	114.493	243.071	152.179	358.737	123.206	130.27	183.853	288.869	509.672	471.393	423.213	162.814	291.368	107.593	113.416	229.938	271.367	259.567	233.806	223.369	309.734	530.13	388.875	185.589	151.054	263.676	251.218	83.4828
	152.753	287.526	138.595	457.027	123.849	99	162.821	312.031	187.943	438.975	357.314	181.424	160.584	98.6721	115.342	201.737	164.842	277.151	223.167	206.068	266.408	484.333	341.165	176.77	128.224	196.621	278.688	96.1558
	147.017	296.466	138.03	610.115	123.808	118.775	166.982	415.567	716.491	578.775	427.5	168.971	174.924	104.652	149.439	198.855	245.931	242.851	188.038	164.403	302.667	460.471	290.056	163.28	134.826	177.649	242.7	103.015
	107	358.937	112.467	340.835	135.394	114.441	173.244	368.127	772.566	402.116	467.041	188.657	155.707	125.465	113.052	203.075	251.195	229.145	247.466	205.913	302.987	581.328	269.075	268.213	113.065	241.576	246.761	109.931
	107.387	329.859	128.516	727.671	135.509	107.606	233.724	319.449	223.618	291.816	161.434	196.722	138.141	102.421	123.268	210.867	236.462	245.597	135.233	203.354	244.176	566.423	184.925	122.965	116.775	274.539	215.635	111.912
	124.321	288.195	134.985	432.846	135.211	59.9853	162.377	246.638	594.044	149.382	422.362	177.74	157.525	91.3521	113.87	219.583	255.368	300.414	332.175	177.724	271.627	437.449	331.2	240.761	107.895	211.296	235.514	87.4384
	152.048	255.417	114.145	560.345	120.379	90.125	120.767	280.197	292.344	366.918	372.642	165.135	164.042	83.4844	118.833	200.973	204	221.147	260.188	184.066	287.567	251.18	262.592	218.418	114.19	132.737	265.494	94.973
	117.357	350.139	120.465	459.765	106.06	98.7625	180.13	394.45	858.589	169.122	565.286	151.265	174.675	103.741	111.092	196.627	228.803	287.385	268.5	188.483	239.5	304.514	273.101	191.182	95.5735	304	228.859	107.06
	113.465	469.439	146.78	342.577	128.493	138.481	175.333	413.364	297.317	338.759	706.378	171.406	175.483	94.3718	117.797	223.615	242.408	228.305	203.835	214.815	328.704	449.551	236.246	218.569	116.369	136.079	234.544	90.1719
	132.792	344.486	145.957	579.908	136.912	149.371	161.545	376.654	705.859	303.569	758.246	182.539	154.584	103.808	108.365	234.641	216.071	155.921	168.826	213.647	255.197	447.959	285.414	146.149	131.076	210.77	236.147	101.468
	138.018	356.219	107.985	555.862	123.221	104.019	161.226	287.595	380.924	267.156	205.344	191.408	143.949	113.356	106.897	205.845	219.475	272.247	163.406	195.925	263.877	488.377	275.367	189.818	130.329	189.179	204.493	91.918
	138.4	486.986	117.296	562.033	89.7119	136.125	174.159	275.783	617.24	308.047	585.254	156.974	147.843	99.3881	126.963	196.746	335.264	280.507	263.969	216.395	68.7857	474.447	366.697	131.708	112.782	232.325	273.654	105.986
	125.147	264.913	141.438	610.046	122.892	173.1	214.143	402.731	713.493	430.046	453.328	158.524	156.475	105.452	126.873	197.039	181.513	288.65	158.282	177.703	66.5849	467.96	358.19	121.286	145.182	191.536	219.855	87.8816
	138.846	251.861	126.07	593.288	141.662	120.026	223.014	288.276	701.939	273.235	489.747	183.247	157.286	101.16	104.208	163.304	165.9	258.583	228.811	215.915	98.6667	423.574	379.791	228.361	93.4507	186.905	215.658	95.5526
	122.412	463.196	129.779	573.586	112.368	133.662	200.855	234.431	563.838	308.934	370.392	157.701	175.565	111.841	111.934	177.788	188.903	286.618	213.484	319.121	84.1481	421.888	283.026	121.935	106.711	181.169	207.203	98.9429
	116.407	283.286	138.492	661.909	136.905	358.7	146.614	436.358	748.967	105.37	215.74	174.71	138.226	104.188	113.574	205	272.74	199.696	269.595	254.583	56.8148	530.075	258.829	175.5	128.87	211.582	231.278	96.7121
	105.108	274.115	112.944	479.183	144.844	372.438	183.255	308.4	646.5	247.765	512.076	173.269	173.186	103.883	119.571	197.63	209.579	264.534	214.701	234.885	82.3966	449.822	352.914	187.81	137.982	243.882	197.733	87.7237
	132.56	290.211	108.986	485.182	126.092	134.07	153.381	249.938	276.656	359.273	464.754	183.891	161.589	114.797	124.526	207.125	226.105	216.458	187.714	248.923	45.5231	502.412	220.141	197.306	121.128	216.882	63.4267	115.301
	101.831	307.423	126.785	582.537	125.013	170.78	218.403	382.62	636.125	317.987	329.545	167.246	142.367	105.18	114.569	204.197	229.875	219.128	206.276	275.538	53.0429	313.721	360.235	171.389	131.028	249.597	231.836	86.5333
	132.107	554.474	102.926	550.81	122.304	98.5536	153.077	284.737	717.042	303.219	362.567	176.492	158.859	92.8	116.433	199.281	232.333	236.675	199.025	226.487	55.0164	400.244	342.475	174.712	132.075	243.812	276.691	102.161
	142.738	307.452	108.304	611.025	109.548	189.431	135.2	269.836	228.525	303.273	256.923	183.653	139.971	121.317	125.582	195.806	241.508	232.805	309.37	210.153	114.877	457.117	404.578	117.672	116.867	228.417	180.875	94.5205
	125.925	557.594	132.078	676.273	113.103	144.962	161.653	265.015	844.133	279.806	705.138	174.133	157.729	132.029	127.462	205.788	265.941	231	184.908	224.922	53.9825	448.649	299.439	153.731	100.299	145.681	243.684	91.4744
	138.453	294.898	146.829	702.922	123.158	136.426	151.41	361.533	808.879	59.8875	373.345	174.653	158.703	96.3462	118.25	224.654	161.103	244.705	228.145	266.263	74.5714	536.563	282.431	218.58	112.339	146.667	211.929	80.3816
	104.714	343.746	139.151	612.474	148.898	130.321	151.026	306.944	673.823	234.973	492.041	171.384	190.62	100.345	123.392	182.7	222.25	254.949	260.393	263.538	69.2838	555.82	475.355	117.63	115.904	170.346	65.0769	110.392
	134.481	287.288	106.483	551.684	126.507	113.491	204.527	358.538	860.65	202.907	350.056	172.034	152.147	91	114.097	268.228	220.228	225.183	181.239	200.44	86.4348	511.625	582.419	344.1	117.634	187.408	229.859	86.8333
	98.4267	256.31	107.377	597.287	109.228	128.836	145.709	314.887	790.457	263.182	331.143	153.133	151.658	104.564	138.985	172.492	223.12	227.077	179.662	225.886	87.2083	423.395	289.471	132.836	106.778	311.396	224.224	123
	120.872	294.051	119.566	613.324	136.1	185.745	214.19	378.382	542.324	356.615	386.073	133.937	173.97	110.118	118.543	224.961	150.306	137.469	127.015	261.485	63.6462	288.175	286	219.592	123.276	184.341	183.4	104.92
	130.54	617.812	113.6	586.867	131.057	146.019	210.448	352.813	716.092	386.915	355.641	147.362	161.864	111.276	146.913	172.375	242.175	302.527	223.514	206.175	82.3625	503.333	355.377	148.705	115.925	257.811	179.13	92.0513
	126.862	281.018	125.182	575.253	120.859	62	172.917	423.314	252.433	342.889	422.333	193.973	176.337	96.5	115.089	188.758	132	221.333	205.863	228.868	77.08	491.857	355.303	179.797	128.277	266.551	47.8421	118.649
	119.278	310.753	128.929	548.162	120.254	98.3421	146.28	254.608	643.224	245.975	396.277	188.304	132.311	120.672	99.0822	201.968	220.983	175.912	253.915	188.681	76.9531	494.5	313.113	214.942	110.491	274.544	293.127	116.137
	114.442	302.351	114.349	616.377	122.986	104.974	169.306	261.667	732.735	324.27	376.078	151.486	158.044	116.308	123.727	181.597	221.292	237.868	213.71	234.014	86.4861	489.3	398.185	149.738	112.122	150.683	201.618	113.653
	104.865	319.705	94.4464	542.114	124.705	181.724	179.513	302.529	726.266	331.433	375.471	174.429	165.792	109	126.123	176.027	135.972	76.6364	210.547	165.032	63.1447	643.612	285.5	169.638	117.566	86.5	268.342	103.643
	102.085	318.415	111.064	587.5	108.082	127.06	235.026	262.603	834.461	443.625	428.143	190.621	151.793	100.886	115.281	203.912	168	69.7538	240.72	257.207	85.194	428.362	409.409	154.468	140.731	178.095	237.882	99.5441
	128.557	308.96	119.257	590.231	137.623	330.265	232.418	262	725.921	306.764	425.641	186.145	157.039	88.1429	92.7123	209.539	217.632	181.172	186.154	220.043	80.125	691.492	365.696	133.183	124.296	195.338	208.309	91.7353
	133.414	280.296	147.184	553.987	130.746	197.567	198.462	322.797	791.063	261.925	278.513	151.868	153.018	102.19	111.881	197.211	197.667	44.8806	162.855	198.579	85.3544	390.767	296.018	157.62	139.786	171.75	250.8	104.776
	108.7	324	111.397	574.15	86.8214	238.985	151.236	280.815	646.125	191.317	388.273	177.729	205.089	108.718	112.571	186.887	246.406	285.65	234.872	223.885	83.5616	340.013	409.909	186.031	120.849	138.231	233.966	100.61
	125.082	291.753	119.714	495.119	209.77	105.984	167.45	267.763	750.714	268.302	394.526	176.588	163.795	110.421	116.034	196.037	181	221.012	204.203	216.288	70.5152	489.042	341.015	166.068	93.7973	152.27	217.081	99.303
	103.5	305.853	140.128	547.873	44.7949	187.517	164.885	278.842	681.452	259.653	432.899	172.107	142.921	107.041	119.596	169	109.983	242.52	152.117	247.578	98.7895	525.857	374.217	143.857	140.203	145.825	220.39	99.6721
	121.857	424.956	120.465	628.25	145.912	97.3684	153.063	283.608	1034.33	313.051	370.671	191.923	154.966	111.743	117.557	168.677	208.908	150	256.083	246.934	81.859	410.975	347.535	158.354	106.839	291.171	219.192	108.263
	125.527	280.308	112.042	579.246	120.929	147.333	146.6	249.534	580.653	179.115	529.448	154.57	145.158	99.7179	134.548	181.479	181.629	160.474	216.645	219.571	61.0678	599.279	347.486	151.667	118.682	229.984	242.857	99.2647
	101.085	293.603	102.5	611.316	104.551	177.571	170.418	233.216	838.859	237.262	208.338	183.886	138.794	84.1875	116.012	272.471	79.3582	149.714	118.781	291.689	77.9048	429.688	355.476	160.043	121.852	208	240.379	77.6377
	112.529	275.968	112.781	424.216	107.052	98.6667	168.836	370.167	681.75	338.035	226.741	166.284	165.317	88.6795	135.842	206.732	122.741	154.882	166.233	210.409	84.8333	389.179	344	112.5	121.2	175.699	172.594	92.9706
	125.436	283.145	110.676	547.228	77.8889	263.797	139.462	342.469	478.035	334.521	452.081	174.618	158.846	109.324	125.769	239.734	51.2807	157.132	170.848	262.526	55.3448	522.956	391.6	109.721	118.519	212.389	175.875	98.1563
	130.257	315.247	101.968	457.089	107.632	186.147	170.582	277.432	752.086	316.355	550.544	178.247	157.526	108.234	121	208.582	39.5172	269.769	192.228	178.855	105.015	472	285.77	222.403	122.615	161.754	52.5246	103.886
	107.324	282.773	137.579	568.697	149	170.507	182.197	251.181	609.356	296.544	452.183	159.431	164.623	91.5571	111.442	227.377	61.3649	124.541	186.123	206.365	75.5862	439.829	267.69	246.067	97.5614	144.914	226.182	114.707
	119.697	475.414	117.246	422.775	107.186	129.797	174.762	271.987	706.059	295.554	163.855	155.486	145	97.7941	117.038	224.726	266.191	243.982	222.833	200.053	95.2154	613.031	371.263	262.531	103.536	197.197	242.25	82.7763
	101.915	266.635	127.523	576.229	115.937	171.024	291.708	349.529	621.237	313.625	506.829	156.643	152.949	110.256	112.522	262.903	234.259	237.364	217.855	189.875	82.1875	491.178	381.789	112.354	103.421	187.291	250.164	95.2603
	147.375	275.061	116.825	562.701	94.3239	164.291	180.292	249.2	534.814	172.633	591.067	183.632	170.145	106.117	121.947	244.375	260.52	183.465	220.461	264.787	99.3846	636.841	451.051	207.687	109.359	243.988	218.957	92.8182
	120.417	467.322	107.09	576.115	121.213	200.044	174.329	282.586	607.151	266.691	614.044	174.506	156.676	94.3898	123.629	253.21	313.68	223.308	207.263	198.113	61.3692	486.873	270.946	216.857	118.696	250.625	198.443	90.2258
	135.161	285.395	118.544	610.8	110.295	228.932	180.262	243.28	505.26	282.486	101.338	162.267	157.716	115.815	119.5	278.603	203.557	138.189	216.726	214.903	97.5139	425	317.03	117	139.797	235.631	254.127	103.474
	141.118	284.408	116.77	540.516	115.078	169.414	149.583	258.885	657.475	345.753	133.638	147.031	161.018	106.603	130.038	282	176.953	45	201.446	207.557	70.3621	320.487	330.333	164.577	113.731	125.152	218.732	97.45
	112.183	280.848	141.716	529.487	90.8056	212.324	162.779	248.697	715.771	208.435	159.57	178.474	170.111	75.5362	120.289	194.757	161.547	46.1343	199.122	208.529	79.5152	511.379	164.767	229.295	94.9508	190.053	232.319	96.2069
	120.679	319.338	115.833	688.975	94.2222	116.054	161.188	286.159	826.859	306.847	174.027	176.582	156.747	107.443	128.338	248.911	69.3273	85.6136	268.623	255.269	44.8649	415.035	256.803	192.197	115.722	236.508	271.632	82.8475
	126.147	227.392	94.375	561.861	94.5968	164.5	152.478	289.5	470.474	325.605	49.4167	152.597	173.072	93.8064	112.692	245.258	218.436	93.3286	215.818	227.233	38.2687	405.662	285.458	301.621	113.179	279.586	252.123	128.943
	121.483	314.137	125.143	573.877	115	702.821	216.316	227.265	363.736	303.408	138.491	161.053	157.27	128.658	118.016	217.962	67.425	217.508	308.441	219.426	79.9821	515.897	331.735	152.74	99.5769	180.963	221.422	93.3478
	122.757	240.643	142.12	647.667	119.85	609.482	205.356	368.633	299	281.043	180.064	157.108	168.478	118.348	121.8	254.361	104.634	132.476	261	190.806	103.37	592.961	347.708	176.104	118.603	146.6	230.464	112.141
	123.214	277.277	120.714	612.833	106.016	550.113	185.145	298.833	494.577	180.523	147.844	190.887	148.847	90.3889	142.704	218.726	92.0727	203.264	215.625	233.746	113.076	412.088	280.561	127.216	89.5	137.641	242.083	98.2833
	168.204	321.257	125.446	577.45	118.075	459.016	154.076	263.234	416.721	297.946	157.571	171.465	157.26	87.8987	116.039	198.706	102.574	243.119	175.836	286.474	97.1519	589.75	356.139	81.662	102.217	107.254	210.123	96.4853
	154.862	358.679	122.529	565.943	118.939	627.928	183.8	272.867	741.982	266.866	248.047	158.849	160.873	100.5	121.351	207.216	96.3896	200.154	161.27	217.537	155.513	289.418	335.533	239.257	93.8667	239.114	242.853	99.931
	139.697	317.233	123.93	415.486	95.8644	310.508	198.063	402.696	601.054	305.329	194.132	180.871	162.456	104.855	143.383	213.236	97.8769	218.689	162.877	206.384	157.847	456.4	334.967	111.424	107.62	86.9444	245.893	95.5574
	114.667	260.224	108.828	468.785	119.779	378.53	198.413	240.535	652	288.153	256.446	154.365	171.838	118.78	118.24	221.9	86.0606	205.892	242.914	206.333	159.776	464.964	421.418	149.726	102.25	167.747	221.875	106.842
	143.86	246.347	126.851	496.617	91.7344	410.541	121.351	438.914	457.957	342.95	222.028	184	164.655	97.5538	125.101	223.846	65.2571	232.641	238.264	153.39	272.988	443.284	325.368	184.987	105.034	178.974	240.268	103.646
	111.095	281.404	103.194	315.203	120.52	537.145	173.455	243.203	568.649	232.456	208	153.721	152.975	104	124.8	222.61	153.159	268.316	221.238	244.211	460.027	498.976	231.282	216.121	103.486	159.717	217.176	109.986
	125.027	309.053	115.987	600.5	114.667	479.386	150.483	268.25	887.105	278.014	230.363	163.718	176.433	104.218	110.85	246.792	169.691	304.649	220.538	236.16	87.4118	500.743	422.393	211.632	103.406	167.102	247.892	95.1176
	109.442	282	94.2895	509.477	132.769	709.179	164.756	290.684	398.738	279.304	224.772	195.868	152.74	114.257	123.861	226.778	188.986	253.359	199.896	207.756	332.232	600.84	367	190.438	91.8667	193.773	221.12	95.3014
	128.632	334.778	119.536	437.767	101.038	599.757	179.742	364.4	978.275	253.519	238.338	161.986	209.717	103.079	108.923	205.675	314.882	114.039	170.983	303.603	75.9067	481.282	373.269	108.818	120.537	121.565	198.167	121.037
	101.541	258.339	115.923	527.526	118.085	135.473	151.429	427.75	388.493	309.795	243.785	129.354	145.795	105.716	117.016	195.438	189.815	206.013	185.667	179.795	160.743	426.614	354.866	284.263	117.378	160.585	218.772	100.385
	115.722	328.279	117.846	375.983	128.868	151.055	210.852	469.343	929.242	306.5	230.597	145.174	176.629	101.294	126.91	212.173	307.083	251.899	266.169	186.197	238.797	595.188	273.481	235.597	107.756	159.603	244.657	98.76
	157.727	314.948	123.557	510.676	116.344	175.925	170.667	416.921	384.162	339.304	173.789	194.971	158.663	108.412	105.016	253.36	175.191	220.926	232.934	247.333	90.193	534.588	185.067	289.391	101.615	131.983	231.965	108.884
	103.647	294.75	124.732	554.153	110	113.418	163.226	441.577	544.817	166.571	190.985	174.772	153.764	118.421	136.926	190.015	212.986	207.121	211.066	222.241	94.4561	536.333	287.435	179.759	76.6727	163.3	237.458	109.532
	128.2	375.21	126.317	646.613	114.174	105.816	135.75	470.808	709.418	235.093	180.581	178.246	159.391	111.582	120.215	215.133	246.515	220.641	183.439	209.356	362.8	445.513	333.984	253.475	131.286	123.254	269.279	102.239
	136.051	277.915	107.915	317.351	115.887	169.343	183.4	415.261	425.015	377.78	179.468	188.895	138.05	93.8676	100.931	213.333	225.928	221.137	253.824	212.426	79.0172	383.567	330.647	172.836	109.254	144.257	330.653	102.984
	110.736	359.115	124.329	458.481	113.821	669.028	142.171	371.972	987.758	293.632	92.7273	151.435	128.472	102.106	121.917	214.303	164.294	248.305	303.029	194.42	233.514	487.947	270.924	167.594	93.7246	182.19	261.892	100.5
	147.776	286.917	144.573	552.093	136.507	143.732	156.382	511.254	551.456	304.85	163.862	169.057	150.281	114.473	116.667	235.557	248.474	209.528	247.759	220.414	314.721	531.817	342.017	125.747	83.0417	197.84	253.573	101.333
	110.109	336.295	130.127	565.9	109.233	568.091	161.68	478.371	270.983	296.365	169.913	151.418	132.742	99.8875	120.074	247.5	317.362	277.7	217.899	203.066	298.15	533.137	285.467	109.477	101.871	212.767	240.163	93.6
	105.343	282.684	115.947	582.088	106.478	705.348	129.88	435.105	632.893	245.983	214.944	148.076	149.938	101.397	130.953	274.554	168.288	246.548	259.089	211.125	288.622	409.573	262.051	210.728	109.494	138.316	223.237	101.754
	127.514	266.703	127.075	597.738	114.737	453.964	133.637	470.392	800.088	361.81	222.407	144.597	148.97	101.95	102.589	211.822	204.836	186.127	184.966	200.421	265.324	663.782	184.515	96.5	95.7794	197.603	246.556	101.291
	106.167	260.638	118.051	542.089	99.4776	558.193	147.318	478	411.205	282.411	264.517	162.687	148.631	106.514	128.655	178.641	190.254	73.8116	204.173	182.307	299.027	521.61	366.051	204.292	95.493	170.898	222.579	92.7414
	120.299	300.425	132.419	608.65	127.117	231.06	147.046	328.803	279.123	292.984	216.462	149.897	134.063	101.167	110.328	189.586	180.143	188.744	220.039	233.682	168.303	323.974	245.219	178.806	91.4915	132.8	209.705	126.333
	119.719	264.701	112.273	400.125	117.044	524.014	146.633	435.985	683.125	332.461	206.734	149.459	165.563	97.2462	129.353	193.753	210.691	237.532	219.795	196.594	293.646	326.924	324.127	169.406	114.09	168.231	259.776	117.864
	107.987	261.355	141.843	481.869	127.734	511.577	146.811	332.985	241.156	287.714	246.95	157.757	137.813	104.368	118.354	193.361	266.382	251.387	254.397	191.757	283.565	398.283	322.319	165.701	90.8077	183	215.986	98.3768
	114.508	291.551	126.86	586.557	129.213	624.597	137.712	480.176	617.819	314	129.064	174.558	139.694	98.7848	109.045	197.8	253.44	229.853	223.961	155.573	283.877	408.052	334.933	121.348	96.8551	177.869	231.917	114.079
	103.721	493.141	106.448	568.328	124.116	631.585	159.312	395.608	319.344	251.928	219.732	168.556	149.809	98.4133	134.393	247.853	253.276	217	217.618	207.2	191.177	481.906	294.621	114.867	104.141	134.517	222.12	97.6571
	131.176	331.284	130.797	510.946	113.418	680.407	150.177	413.247	813.85	432.987	214.847	182.545	156.557	104.836	112.603	216.462	265.646	236.205	263.805	210.338	166.027	388.952	682.487	168	112.968	153.222	204.766	96.1154
	150.636	317.985	115.708	592.625	116.403	769.389	155.403	384.151	688.931	282.186	268.552	164.429	151.307	94.6709	97.527	325.759	255.049	251.757	251.611	197.219	200.475	319.254	534.12	105.15	113.132	172.964	185.62	97.0135
	159.209	272.425	106.914	743.899	105.463	811.183	155.737	465.328	700.518	284.6	160.461	138.342	241.39	103.885	101.985	224.477	270.56	238.819	237.757	218.067	176.797	353.7	219.247	156.917	108.603	141.36	245.896	102.065
	130.571	400.197	149.603	623.346	109.514	541.031	137.219	413.696	165.586	233.463	293.155	193.214	167.277	114.388	130.119	213.263	268.42	221.733	242.691	177.156	169.567	339.768	212.885	126.082	112.231	100.612	230.957	118.6
	141.085	271.013	132.016	627.904	111.222	526.742	163.635	484.408	225.211	188.94	248.174	161.722	65.0972	89.6897	110.733	208.321	234.667	73.6351	200.818	190.875	212.731	437.608	187.846	156.419	97.4	278.081	242.926	123.177
	127.595	226.109	117.5	523.132	128.478	360.235	158.358	455.985	785.377	314.241	275.537	161.75	157.848	105.072	110.592	202.7	237.018	219.481	150.541	200.468	360.443	326.754	284.026	219.37	89.2143	296.763	251.053	126
	108.841	467.875	141.167	502.06	128.213	654.792	142.788	508.352	435.478	222.892	210.483	185.074	151.139	101.324	111.89	232.184	214.329	187.517	216.2	221.425	340.462	458.727	193.075	247.938	113.609	244.353	225.579	92.4268
	116.133	278.178	92.0933	578.949	112.293	714.246	155.768	494.122	765.421	443.319	257.699	246.779	472.939	99.507	87.6487	206.838	140.951	135.224	221.853	181.754	395.58	351.444	222.738	242.076	109.333	272.318	252.133	102.046
	149.054	303.231	152.538	591.224	110.483	153.493	159.824	458.183	700.153	312.746	274.123	172.329	141.267	89.0133	132.329	239.943	267	186.101	129.361	200.476	235.434	384.519	289.559	306.478	114.068	427.95	245.986	108.5
	127.566	247.943	131.122	532.128	127.984	707.794	127.583	359.121	791.559	281.949	270.658	164.768	167.532	109.789	119.183	185.571	193.404	240.304	171.099	186.407	317.93	454.449	282.215	191.129	82.5714	296.458	227.633	96.3014
	132.646	294.406	144.033	434.806	113.162	702.712	159.423	491.233	752.907	307.974	289.569	168.462	164.964	105.373	123.628	247.265	256.265	160.987	191.866	194.821	348.27	618.225	399.522	95.8714	119.211	122.408	281.5	105.738
	114.828	498.647	164.372	421.93	107.831	324.48	151.471	393.213	948.219	417.603	335.268	165.633	157.467	79.2568	120.478	220.592	302.203	268.253	218.667	236.722	363.818	331	295.566	110.643	85.6333	350.364	226.25	90.6812
	110.127	320.827	120.338	456.485	93.3467	674.937	128.31	380.618	586.452	349.169	152.41	170.89	141.77	126.508	114.128	249.606	156.934	164.662	195.614	195.025	314.322	359.71	273.6	180.342	119.589	239.26	257.421	108.688
	128.719	298.592	135.636	335.548	89.4559	769.27	85.4177	383.418	865.162	266.406	150.397	117.117	136.729	101.73	115.883	220.844	327.487	274.657	207.271	215.106	304.554	474.427	175.724	177.235	97.7143	231.577	227.864	110.306
	138.984	298.931	129.354	248.467	125.915	591.194	143.885	484.935	397.82	342.339	269.64	159.452	144.493	106.264	121.441	171.839	366.122	222.337	210.377	214.212	342.56	301.538	200.265	111.129	97.8354	290.258	225.986	105.737
	149.426	338.017	130.658	333.359	109.141	471.015	132.958	431.434	741.303	305.809	237.089	160.508	167.446	99.7432	106.195	204.842	151.803	231.671	204.563	210.661	337.544	347.984	314.684	222.041	95.507	95.4783	246.636	107.785
	136.414	224.817	153.258	280.646	110.014	316.176	153.1	469.5	500.105	255.185	226.304	142.068	158.192	106.088	123.216	261.842	195.705	309.781	199.169	194.282	318.896	306.362	414.37	110.367	117.632	263.481	255.087	123.059
	134.873	337.507	137.743	352.127	132.513	567.079	590.311	489.221	587.908	308.155	182.038	177.542	167.446	115.418	94.7714	202.152	284.133	240.689	224.485	187.253	281.071	231.683	306	262.779	102.935	183.613	234.548	104.103
	145.466	381.486	96.2154	433.632	161.345	515.272	152.133	405.189	402.032	337.279	223.25	261.5	152.413	120.769	117.797	231.025	87.4058	219.379	266.588	168.031	347.233	251.865	348.623	133.562	102.797	157.063	215.219	103.77
	164.941	299.724	133.667	362.571	113.13	489.597	189.521	375.291	554.291	373.75	253.343	163.567	160.125	124.507	132.597	176.871	223.014	267.349	199.974	207.238	276.721	423.269	342	123.274	103.677	295.576	162.843	115.395
	103.117	253.896	139.671	421.034	106.571	419.275	554.149	327.635	871.719	378.151	253.773	175.206	126.475	87.1304	103.5	208.882	309.279	218.545	224.971	243.014	269.228	412.797	233.743	203.873	103.786	186.077	228.521	87.8356
	134.065	315.211	149.597	420.264	127.052	572.426	493.654	348.825	480.145	431.379	227.486	188.625	131.371	118.395	130.615	198.75	110.167	210.957	196.413	204.452	287.264	491.266	273.655	123.588	89.0714	196.315	223.096	123.4
	132.292	258.513	158.344	320.453	115.8	630.869	519.421	451.467	758.868	443.513	127.972	156.642	162.597	92.7703	121.727	227.078	137.187	242.179	224.557	201.618	292.813	338.216	314.468	204.923	108.361	164.675	222.394	103.375
	105.697	298.345	123.97	366.233	117.513	779.038	553.072	326.675	545.538	387.087	154.039	158.675	153.506	94.924	114.328	184.646	160.711	197.643	235.175	205.565	324.521	420.901	311.74	185.273	94.2025	261.414	235.861	108.947
	123.696	285.737	124.191	297.493	130.338	656.083	583.492	454.913	579.529	334.761	273.425	175.424	177.018	119.92	131.515	218.254	124.952	181.515	151.514	183.488	229.708	365.6	301.492	110.723	105.826	267.486	228.444	111.77
	114.855	332.974	117.884	381.082	85.4583	551.018	553.444	434.288	987.833	359.897	278.11	170.491	158.175	91.5769	118.776	229.627	145	241.123	172.311	178.895	358.917	260.757	542.05	106.095	125.934	294.811	255.742	93.5667
	121.113	353.526	127.863	397.872	99.3	582.545	577.437	449.988	243.118	312.039	391.852	177.913	210.918	95.7625	134.754	209.045	144.2	211.105	235.585	214.301	219.776	275.606	311.95	232.71	111.988	359.833	171.947	98.589
	132.605	302.054	105.039	299.886	104.348	550.296	542.823	488.724	862.908	291.554	472.758	173.965	173.306	80.7541	125.835	182.432	137.047	153.962	162.696	297.785	276.785	411.485	304.87	142.985	112.961	231.222	103.795	116.656
	126.493	298.756	102.889	257.053	106.987	331.911	706.405	422.253	445.29	285.574	252.962	159.054	161.831	84.6267	114.594	169.238	122.321	218.693	168.575	363.705	266.5	410.692	348.72	111.868	99.3692	258.086	225.141	105.701
	126.31	402.328	122.224	276.194	120.973	570.641	164.899	385.25	653.424	322.616	324.195	175.988	153.791	87.4237	115.492	205.071	243.867	237.2	246.741	302	264.117	444.232	350.297	138.591	103.474	212.756	288.703	113.917
	92.0137	305.91	130.393	300.9	91.8814	645.857	195.132	430.436	809.107	363.86	183.256	180.051	162.756	89.7533	116.196	185.81	141.308	224.344	102.676	280.143	203.129	445.108	396.227	129.2	83.0779	325.545	235.333	119.313
	127.432	228.191	159.013	312.982	96.8182	651.356	664.653	493.167	580.4	379.603	188.79	176.027	168.408	113.923	99.9123	184.324	91.1719	217.712	207.797	261.625	310.879	335.868	331.778	123.143	97.6571	211.088	250.957	107.203
	109.091	284.818	118.892	363.863	107.948	603.763	163.338	404.299	727.101	338.667	277.808	168.052	166.025	76.7013	116.309	168.551	73.6406	265.973	191.269	217.051	377.379	419.895	401.75	136.161	106.545	302.091	278	108.316
	123.96	305.079	122.432	339.093	83.1343	718.849	599.39	450.694	717.39	368	243.982	182.507	123.746	92.4177	117.069	207.65	92.4521	276.948	217.127	192.217	311.307	469.912	337.867	231.071	107.625	181.74	308.391	89.25
	144.573	322.605	134.725	452.735	100.397	538.708	659.038	442.128	599.906	409	233.944	160.563	155.478	103.908	138.447	196.383	89.8462	228.25	223.821	222.169	309.487	495.89	262.282	204.271	95.5063	103.816	323.197	91.0563
	118.167	325.519	134.527	239.318	142.108	612.27	192.946	442.972	314.344	372.344	357.362	175.5	202.831	119.026	140.884	179.356	41.7639	141.417	210.548	229.536	258.896	454.039	311.962	151.053	105.671	385.463	239.984	90.8448
	143.305	310.741	123	348.07	132.415	421.2	506.195	487.075	337.333	322.865	456.382	196.712	156.101	106.65	117.813	181.579	70.5205	265.81	211.543	253.608	268.359	304.017	238.882	149.583	95.4815	288.032	279.616	104.556
	105.096	280.027	127.473	297.421	110.176	554.767	608.014	370.614	486.6	320.831	209.5	152.85	175.421	120.22	117.547	217.108	169.718	207.188	268.764	272.263	258.032	534.448	325.588	179.5	107.342	190.152	258.458	79.7377
	104.877	267.026	99.8846	288.93	97.0806	544	206.923	393.366	544.844	255.441	162.313	144.852	178.211	115.547	107.42	232.654	146.382	228.316	184.738	266.627	278.194	487.101	287.034	90.8679	84.9459	165.486	260.164	118.905
	150.474	271.721	136.358	316.479	122.035	776.338	124.97	309.417	585.397	292.855	37.8082	169.412	157.544	101.444	118.28	203.277	161.663	235.225	229.635	264.393	248.681	411.792	324.392	274.506	104.696	152.5	297.655	88.9531
	143.295	251.93	157.469	254.377	95.6282	795.466	230.319	439.681	464.38	364.91	196.661	191.121	197.366	94.5658	112.908	219.145	162.276	232.313	195.667	301.382	240.456	462.632	352.184	146.944	121.449	298.442	228.027	107.844
	121.656	337.486	116.519	284.871	119.262	714.403	265.946	479.417	542.123	390.9	173.348	166.532	178.086	93.8333	127.403	254.975	45.9242	222.822	241.299	242.026	232.211	449.5	340.68	186.871	85.983	178.072	226.373	108.279
	130.597	244.419	118.094	395.409	122.625	336.051	256.81	325.426	378.515	337.481	123.034	186.25	181.603	108.7	100.811	232.333	185.275	217.649	170.346	280.106	224.364	356.169	314.347	139.909	110.224	238.731	243.574	114.63
	140.062	270.839	110.851	314.304	121	487.282	271.943	425.971	477.831	301.45	54	161.438	153.405	84.6	101.671	209.074	190.051	272.414	140.386	263.203	117.353	366.71	372.507	194.1	100.403	221.667	212.393	102.573
	139.083	316.857	124.733	310.542	115.506	392.487	136.433	474.848	497.113	345.416	324.615	167.25	201.523	76.2188	104.73	191.177	208.945	220.015	223.775	226.817	50.2745	398.441	350.169	104.735	91.7361	153.083	228.662	101.713
	135.039	227.069	110.77	332.68	131.311	508.171	254.379	437.554	362.842	351.295	231.194	201.702	170.703	86.9103	131.05	192.59	206.845	265.929	208.304	180.109	103.83	309.905	328.247	264.672	98.5128	249.91	309.889	91.2064
	117.846	299.892	119.197	395.2	117.471	537.014	270.719	445.526	485.763	281.231	286.661	176.725	160.735	110.514	121.918	195.455	246.09	247.156	236.066	206.034	88.4902	295.81	320.966	120.647	112.513	238.39	235.803	113.446
	118.277	271.922	119.158	274.881	107.143	541.145	115.662	511.304	353.481	172.055	203.696	176.356	156.905	57.3385	145.6	188.973	146.426	218.275	200.441	278	147.284	333.574	289.754	218.91	98.1094	228.688	264.605	108.113
	120.156	320.395	128.096	246.087	102.276	341.909	260.458	356.706	593.069	214.813	307.385	177.066	159.233	89.1519	108.438	158.195	203.26	206.881	206.3	259.38	73.7077	303.919	272.879	112.367	92.8806	176.217	249.662	111.246
	119.485	286.984	123.467	313.296	136.797	613.792	150.017	459.086	428.101	357.229	229.593	161.698	158.936	91.0893	113.968	185.581	177.97	198.582	166.974	234.632	99.8101	272	209.741	98.2615	103.228	214.803	240.964	119.217
	124.531	332.417	131.278	265.613	117.701	771.029	314.718	433.449	407.778	367.56	301.676	170.104	160.096	121.772	108.339	200.371	316.089	264.579	243.017	342	93.9726	503.547	226.824	153.649	103.013	183.233	243.493	95.7101
	123.776	330.742	143.955	236.364	107.951	320.695	213.087	455.227	416.5	439.656	265.097	186.015	183.462	95.7091	125.367	190.319	208.103	148.597	178.07	182.127	66.9231	303.795	226.425	127.617	99.7721	205	294.026	119.464
	149.411	359.744	114.141	289.071	111.882	846.909	277.119	458.014	431.643	258.635	244.404	144.316	189.097	95.6615	118.364	216.489	291.071	44.8493	245.753	299.295	103.635	365.611	365.473	166.286	112.243	284.821	194.179	104.438
	128.167	274.329	127.928	272.323	115.5	551.5	143.299	487.907	675.559	242.21	164.105	195.842	172.036	105.726	128.789	212.275	243.836	73.9342	241.684	259.973	104.625	277.154	257.612	202.718	116.91	212.026	270.485	108.966
	126.154	250.547	110.446	316.8	106.545	665.392	285.457	398.652	378.696	134.705	214.342	189.543	183.4	94.4068	129.088	180.618	121.27	78.8103	174.563	246.319	83.0313	333.211	275.254	209.219	102.644	184.607	268.051	118.966
	148.256	327.082	109.667	297.115	107.848	404.43	411.91	454.185	434.836	293.608	283.695	191.447	145.368	102.841	109.706	217.432	151.233	60.8194	228.768	233.662	70.3692	320.39	313.724	124.923	112	119.25	209.403	109.68
	129.538	256.508	114.319	345.767	86.0571	552.766	152.211	463.744	433.051	369.541	272	177.283	170.441	102.844	146.813	187.972	224.292	129.155	195.063	270.371	65.6364	335.778	380.947	131.702	121.382	247.273	268.912	101.61
	120.613	289.391	129.65	313.015	93.7237	451.718	405.059	441.066	335.184	329.816	207.816	189.137	154.639	79.5075	98.6719	179.278	287.671	88.0161	183.356	273.187	83.2727	341.868	338.143	192.344	117.455	215.603	297.964	98.3333
	159.608	292.73	103.313	326.081	115.182	588.357	129.466	466.329	151.987	324.603	155.089	174.145	167.415	102.915	121.333	175.859	246.3	72.5	231.536	234.153	89.9444	339.058	166.254	300.311	105.986	158.468	205.446	102.672
	130.826	304.781	120.662	321.818	103.1	480.943	156.132	425.375	527.974	328.025	239.986	187.819	161.785	113.587	119.544	194.397	230.75	50.25	196.068	203.785	64.8596	343.262	310.671	183.012	94.1692	175.411	257.785	104.407
	155.254	429.38	149.971	228.095	132.576	815.8	387.212	391.066	378.588	175.895	282.227	167.408	158.397	115.481	142.675	206.65	271.017	108.741	156.732	356.325	77.403	263.683	241.545	178.906	102.833	177.623	249.683	103.743
	134.696	290.395	129.849	276	94.1864	748.844	389.766	428	456.095	423.111	250.699	173.456	169.756	119.071	106.346	201.5	269.283	88.4219	189.062	218.053	77.0933	311.973	300.892	128.509	113.732	104.974	232.962	104.535
	133.6	271.932	120.069	278.11	96.8226	676.329	229.766	401.347	524.939	225.591	132.051	186.5	159.926	79.027	118.282	190.237	211.803	219.662	228.125	273.847	85.0351	395.696	360.598	209.492	102.675	223.444	226.768	110.672
	127.404	327.567	94.3457	291.861	101.493	409.653	335.274	451.667	357.044	418.912	227.5	158.759	168.649	114.063	141.014	176.719	191.228	252.987	198.031	273.549	85.7073	337.987	254.847	179.155	97.726	211.474	241.781	97.8451
	127.425	319.247	109	301.697	111.038	339	375.758	436.237	448.782	356.937	327.059	181.054	150.26	99.726	120.955	218.191	275	215.813	203.633	204.159	81.3529	358.563	286.441	193.701	111.75	174.113	249.727	101.314
	111.103	313.667	227.015	274.983	117.239	475.934	325.385	433.597	598.45	384.592	252.05	174.697	146.79	115.679	101.711	200.653	111.859	237.138	141.9	208.463	111.523	291.333	244.088	190.554	96.2237	157.446	242.885	85.6182
	125.679	315.086	126.652	381.514	102.013	617.439	385.843	410.357	200.417	382.757	278.362	161.354	167.612	132.474	109.156	234.975	149.473	215.892	168.328	268.257	100.075	307.215	297.944	100.583	106.494	199.479	243.254	93.0435
	150.306	244.408	126.295	264.295	103.128	593.129	300.806	352.595	504.273	396.025	230.671	135.081	169.303	110.785	125.831	231.59	283.563	237.867	187.015	184.718	50.9565	314.797	333.8	158.481	115.529	230.913	208.456	106.975
	138.408	310.203	156.449	248.358	118.079	787.807	228	346.966	471.254	336.852	312.074	173.929	237.667	110.302	126.375	188.317	224.703	194.459	240.493	257.633	174.342	456.354	294.789	235.833	97.2857	184.288	245.074	98.3056
	135.282	260.537	134.848	257.367	116.443	737.843	259.155	371.154	515.969	392.868	206.288	151.812	163.783	73.5156	107.789	216.519	211.678	236.421	235.823	247.453	139.431	332.574	235.227	179.403	107.485	195.101	273.909	106.32
	139.525	243.544	100.886	293.718	104.217	437.872	418.569	408.59	305.411	403.696	288.173	157.737	167.113	103.297	103.531	228.776	157.297	225.697	123.986	245.8	175.486	254	259.968	195.161	131.453	144.135	286.321	99.3662
	128.703	280.154	130.532	258.808	112.647	492.859	155.327	446.493	524.91	364.441	264.721	173.079	159.787	107.469	102.848	188.364	228.386	247.031	186.947	230.117	182.153	248.697	310.267	377.237	111.609	129.403	305.478	127.859
	123.26	268.346	125.868	359.793	85.7595	124.036	314.763	428.889	563.176	432.115	267.167	157.347	217.4	85.3462	119.125	205.197	74.9273	230.184	239.098	239.027	186.403	388.924	257.75	163.105	81.4032	152.795	207	109.105
	127.18	342.873	134.121	297.203	112.867	307.103	489.59	358.184	356.015	363.75	141.792	150.266	151.129	104.987	120.277	185.385	94.1571	290.319	231.459	302.086	194.431	360.438	269.295	193.745	104.5	195.19	268.026	94.8857
	139.158	266.514	118.962	313.148	101.726	60.4667	238.296	451.354	322.256	423.033	293.783	185.418	165.563	118.07	116.643	179.346	307.014	227.871	171.6	243.806	157.689	343.867	251.474	211.754	90.5375	225.96	296.183	96.6164
	132.423	289.671	130.892	276.077	100.293	54.7429	271.525	409.69	386.507	273.246	321.131	162.364	159.783	91.4677	102.649	193.58	266.642	224.228	219.8	263.765	433.507	393.896	235.964	141.379	110.056	320.641	216.464	125.937
	116.152	305.53	131.509	277.055	107.96	58.3699	304.955	336.328	355.882	315.714	274.614	171.708	178.492	101.052	115.5	192.274	69.8475	230.728	220.519	193.175	167.386	400.754	240.104	185.016	105.733	149.718	278.636	100.471
	114.956	284.013	122.887	314.044	112.819	48.2344	593.86	376.325	599.474	290.892	247.803	177.254	181.1	102.456	106.708	149.922	45.0508	203.912	208.029	184.906	164.456	322.424	735.933	121.016	82.5821	146.5	275.321	95.1525
	134.893	371.671	121	317.826	103.971	37.48	187.103	448.47	286.211	213.228	254.957	188.818	158.985	122.174	109.031	195.306	95.6552	238.371	203.983	190.836	437.943	233.475	334.983	176	112.033	101.171	239.974	119.717
	119.056	239.493	111.865	266.141	127.403	32.2069	189.72	444.482	523.803	304.333	200.299	164.551	162.788	114.817	130.982	197.171	112.696	293.947	164.232	192.082	171.273	430.298	426.015	110.783	90.2295	188.679	277.5	103.483
	149.543	289.026	106.238	259.224	113.033	40.2464	195.347	398.014	324.654	390.806	212.068	159.672	143.724	110.474	116.713	209.403	233.842	254.475	192.04	223.045	259.641	211.793	538.431	196.066	114.524	240.986	253.096	72.8197
	142.671	306.692	125.289	344.836	108.531	41.1795	524.5	346.817	445.4	299.141	296.413	170.323	162.9	100.365	99.4416	188.584	205.893	268.381	207.672	207.045	150.323	349.25	403.767	149.05	118.324	267.098	242.269	93.1455
	112.681	313.09	123.793	361.318	102.234	75	448.052	350.456	414.891	151.75	309.203	164.329	140.123	85.0727	118.188	176.961	238.541	186.05	189.951	278.949	135.681	220.636	358.795	233.1	88.8667	153.229	274.919	90
	128.923	407.689	105.447	300.961	87.725	69.1	366.891	428.704	377.212	201.871	347.236	161.397	175.164	124.29	100.405	180.055	255.227	174.731	232.04	202.403	364.676	293.339	303.455	168.277	115.182	180.636	204.262	103.652
	117.038	647.585	137.778	310.654	100.466	42.5088	273	427.351	462.027	305.295	337.707	189.765	176.618	110.618	108.561	221.109	285.737	240.09	186.795	210.565	363.74	307.873	339.055	204.525	110.121	122.137	285.013	108.59
	155.895	465.456	119.015	305.789	123.882	68.6377	319.226	337.458	341.056	438.375	358.636	199.265	150.292	111.885	104.233	238.364	234.658	161.194	269.946	148.213	294.237	347.508	369.258	287.375	98.1625	126.667	272.773	91.2125
	140.954	375.778	127.228	306.034	118.658	140.018	528.444	388.369	461.408	427.306	209.292	188.466	156.134	104.6	136.679	250.824	283.984	196.661	199.113	202.161	342.471	351.231	542.515	172.462	102.407	147.534	315.286	106.282
	130.655	542.394	120.197	312.897	106.372	84.2909	450.106	403.877	452.1	345.282	324.873	153.569	140.015	107.632	99.4107	277.493	189.389	269.697	186.609	201.849	246.842	306.26	350.321	180.483	104.865	170.348	235.035	105.119
	147.014	380.481	150	291.676	108.453	35.1594	351.853	447.828	327.957	349.089	288.117	172.82	172.235	118.963	86.4821	247.47	229.029	246.434	215.968	240.986	292.372	412.554	404.924	152.867	105	133.176	266.905	95.0172
	139.257	588.028	132.31	274.717	115.039	83.1967	259.532	389.623	327.306	522.123	228.709	158.554	142.351	112.521	118.111	279.735	224.74	154.091	172.657	341.857	271.308	366.303	328.279	128.583	111.864	198.643	206.338	128.115
	143.705	467.333	91.3429	334.317	111.481	92.3273	497.878	376.817	339.545	160.75	248.035	163.955	156.253	123.754	104.425	251.795	238.717	249.313	184.232	205.387	269.833	417.653	366.533	172.712	112.246	161.404	292.338	104.263
	115.348	566.661	112.494	373.478	129.387	186.418	319.844	488.353	502.987	333.165	258.017	176.311	199.26	123.793	134.083	158.623	269.139	230.762	260.614	191.036	301.054	382.038	387.264	185.833	105.676	165.515	293.823	122.551
	105.356	584.656	109.688	439.831	108.397	177.982	321.464	423.123	387	174.59	277.757	173.63	171.178	108.492	136.944	251.07	235.521	260.091	229.554	175.145	261.393	374	360.056	345.696	109.106	250.983	235.284	106.882
	114.538	358.136	109.429	431.62	119.054	241.446	280.986	385.429	568.574	518.433	259.59	155.918	160.304	111.628	137.848	273.263	243.536	271.4	226.103	167.525	325.877	336.038	431.864	277.639	104.743	93.7536	231.795	109.906
	122.708	638.658	121.896	447.641	109.484	175.745	146.847	442.218	438	406.571	237.469	195.138	169.432	110.541	109.855	223.809	239.3	261.534	187.3	242.111	122.423	317.24	327.39	287.645	113.42	199.217	208.436	99.8143
	127.276	628.551	112.829	419.936	90.4576	98.5091	350.855	325.571	460.973	468.073	157.395	162.838	162.426	101.303	122.961	233.594	233.551	226.706	223.866	301.264	264.919	396.416	352.486	182.299	100.184	148.867	256.4	98.6825
	143.7	445.307	118.387	286.824	114.321	116.208	286.48	407.704	411.948	365.985	518.192	171.066	132.592	96.2683	130.338	224.662	196.543	210.641	212.926	139.835	241.319	312.819	354.29	173.828	110.908	126.506	254.838	128.638
	121.342	364.59	109.117	428.482	100.859	200.587	294.914	392.038	300.603	517.671	128.594	174.724	164.255	92.8919	129.759	254.507	188.493	259.94	206.456	235.153	243.492	279.603	206.101	170.115	115.205	327.586	242.912	102.256
	114.783	588.246	96.8475	364.733	101.397	110.621	380.667	439.929	361.262	390.4	167.051	146.073	161.5	110.985	127.893	234.783	195.694	223.675	227.817	152.59	281	298.806	181.049	182.695	112.956	155.203	278.709	113.937
	137.143	408.408	122.483	410.811	112.6	220.507	203.744	527.372	373.107	399.208	179.354	158.048	149.532	108.307	115.936	235.467	189.55	270.09	217.939	174.369	302.152	359.871	371.662	195.747	125.316	190.063	293.421	101.72
	129.443	460.986	117.054	348.5	104.239	257.033	526.982	401.208	593.65	354.587	163.613	150.566	161.121	88.1525	110.162	242.514	251.208	218.974	254.47	189.114	282.545	351.182	352.026	282.808	105.795	200.96	310.22	106.614
	155.7	504.675	115.014	441.209	97.9492	128.9	486.769	365.575	462.712	376.45	172.493	159.229	154.738	111.986	125.25	286.178	228.557	266.309	246.542	229.171	299.406	409.737	408.921	106.256	119.026	164.809	288.211	118.465
	97.9322	507.282	94.1714	479.964	150.795	186.183	371.877	448.083	286.11	519.889	265.016	159.283	159.93	104.75	115.652	287.913	192.882	261.462	135.255	144.512	261.75	393.321	341.06	168.634	104.115	181.475	255.237	101.75
	130.7	517.986	108.046	354.425	120.229	100.694	132.569	289.753	498.359	346.099	248.475	165.359	228.932	121.644	119.197	175.551	187.644	192.882	115.104	156.316	251.306	319.13	362.125	204.56	124.158	218.908	321.076	110
	123.946	444.179	116.623	366.338	111.362	202.154	171.667	301.182	411.169	310.9	431.93	210.795	132.309	113.42	119.918	235.485	208.513	234.735	150.557	266.092	271.867	286.533	272.218	201.551	106.571	225.939	210.292	105.268
	145.013	520.939	119.521	436.028	121.962	202.15	237.464	489.519	547.514	434.867	328.263	169.195	229.933	97.3797	111.356	246.186	185.067	210.256	148.475	228.971	276.38	190	218.692	181.756	100.787	192.118	252.143	85.2469
	104.138	619.769	110.203	440.208	119.288	277.592	411.65	344.737	479.533	211.819	463.078	174.289	358.191	92.8904	134.838	237.329	197.582	232.946	210.25	252.457	217.841	313.697	306.958	190.133	89.5658	171.924	242.436	90.4219
	140.397	573.508	125.247	266.708	118.406	66.0417	126.113	340.203	479.618	759.452	258.133	175.133	124.938	119.105	100.385	246.855	170.156	225.175	132.507	194.662	265.697	289.295	305.554	203.314	99.3871	207.017	306.013	93.7458
	113.389	513.76	113.13	410.05	132.847	123.746	527.829	351.447	376.095	362.982	409.596	171.313	182.817	89.0448	106.382	247.972	289.397	223.035	100.164	234.017	240.076	289.761	235.693	243.1	102.412	219.803	336.788	118.853
	128.123	578	107.426	339.274	134.083	677.877	276.076	447.86	371.3	426.05	149.042	206.561	200.618	100.444	107.662	236.741	328.65	193.425	233.115	258.19	181.451	200.027	373.333	177.219	92.1519	193.31	271.434	99.675
	95.8657	497.148	91.8701	265.139	103.63	174.159	297.554	385.171	412.464	346.954	161.667	169.283	172.643	117.776	111.949	214.688	254.026	216.114	129.458	213.939	181.179	454.256	334.154	187.597	92.8701	159.108	276.926	105.69
	135.892	523.099	102.423	408.013	111.203	472.882	144.263	440.092	385.688	171.72	288.519	168.064	212.633	123.041	103.613	240.738	304.667	300.515	103.675	182.862	143.304	336.765	250.113	133.178	102.481	120.678	261.926	93.15
	117.558	527.184	116.705	494.423	121.986	759.308	390.205	452.365	406.099	391.351	255.792	182.708	153.878	92.6216	134.791	230.892	292.015	209.776	115.026	228.219	179.411	397.763	257.159	220.2	105.814	503.759	254.689	98.0769
	141.775	561.9	116.213	493.971	112.13	142.354	397.243	413.293	553.309	335.284	318	136.421	172.612	115.062	109.986	194.972	241.937	130.661	186	225.447	96.2807	208.123	249.709	189.307	105.562	215.017	283.987	116.194
	116.074	513.441	99.0435	320.059	109.072	173.605	298.262	350.101	567.754	398.525	375.24	141.569	175.271	106.207	71.1875	276.932	302.557	205.691	227.804	253.891	177.154	375.282	224.348	98.25	103.133	157.56	283.203	92.9744
	115.375	506.557	99.7	448.321	133.254	522.469	468.431	465.82	423.814	251.286	521.926	200.909	169.125	90.859	123	237.744	224.514	173.278	217.747	268.658	235.729	326.808	203.506	186.45	106.154	246.25	267.333	97.0769
	109.317	568.923	85.4928	310.127	142.621	633.132	212.707	380.967	437.597	358.262	48.6438	199.384	213.649	117.646	95.7797	272.253	239.611	193.964	195.585	288.265	394.762	409.288	189.629	171.471	116.514	98.527	273.386	89.8052
	131.533	603.246	125.42	519.921	109.606	118.638	285.298	416.764	328.364	344.821	220.149	178.474	218.429	99.5362	140.808	215.513	286.646	178.036	129.682	294.393	261.203	424.522	250.089	141.161	99.4127	213.839	295.351	96.3433
	129.097	582.697	100.772	452.667	131.747	194.986	407.536	410.842	440.781	357.676	94.5254	164.107	294.134	106.153	114.318	205.824	234.538	189.615	212.07	315.8	91.6667	373.436	185.488	159.662	104.915	619	272.924	86.1923
	110.921	530.865	123.875	360.532	86.0571	590.625	428.946	339.642	469.897	128.091	147.935	180.629	251.059	127.219	103.544	243.288	340.923	162.167	265.883	257.786	380.342	319.625	174.718	65.3684	105.477	108.095	289.579	92.6125
	126.18	335.877	103.411	304	110.815	613.184	451.359	409.123	446.333	378.303	113.875	176.679	208.873	117.266	111.279	244.684	250.75	249.175	182.493	423.855	380.087	276.351	225.16	111.96	102	143.836	231.913	85.8636
	153.753	481.855	121.7	290.974	138.337	101.169	289.544	393.309	446.879	394.253	310.273	166.544	166.603	87.8451	89.1692	256.429	308.103	205.017	253.722	280.304	84.9818	295.348	215.013	109.361	94.2	318.421	281.923	94.1923
	115.638	391.141	114.807	385.862	103	595.205	294.863	354.821	423.8	304.513	146.151	161.556	286.052	93.5672	110.525	266.825	287.931	68.9595	151.805	382.629	400.922	305.969	250.154	111.014	111.288	274.075	231.473	89.3896
	109.778	503.909	118.458	352.237	126.737	666.231	273.57	254.471	558.059	373.932	233.918	168.117	104.707	126.628	128.356	311.125	309.914	176.188	260.904	289.13	300.338	267	344.81	115.017	110.145	191.308	253.838	96.662
	133.836	454.149	107.091	344.25	123.794	122.103	279.5	341.964	555.985	156.988	223.743	165.808	163.737	106.03	100.935	193.837	167.225	185.443	212.073	281.156	424.961	394.69	262.098	128.156	110.957	257.39	361.955	98.2985
	100.361	446.055	120.267	379.676	127.013	169.532	370.013	309.404	508.507	411.065	75.3881	154.581	160.094	90.1974	123.579	239.284	288.129	169.871	254.851	289.543	287.647	281.919	381.179	120.706	108.58	524.145	286.708	106.44
	141.042	472.175	113.305	256.694	109.419	466.153	226.973	385.407	565.863	475.048	249.952	159.686	178.61	94.9189	115.849	207.792	261.628	187.42	204.483	265.912	394.177	319.551	253.917	349.433	109.678	137.7	250.359	115.667
	131.537	483.056	95.8133	297.339	102.516	503.662	146.197	355.239	355.385	216.869	259.2	175.763	174.615	118.819	118.05	271.122	257.167	169.255	253.052	354.177	350.741	382.241	375.112	223.397	101.338	224.165	335.033	98.8657
	117.136	457.298	139.741	377.932	119.068	486.721	289.705	287.7	232.905	308.368	164.535	154.481	171.232	102.408	109.533	247.244	109.724	270.597	233.395	279.519	308.23	360.087	314.575	104.731	100.101	137.984	300.544	116.281
	109.839	487.947	111.232	327.112	113.959	329.362	271.696	297.747	379.84	303.359	177.78	136.104	204.657	108.031	116.101	212.606	260.508	152.95	214.494	230.088	283.646	474.101	309.194	406.014	81.3538	133.629	261.657	84.2769
	124.932	430.583	135.71	384.92	137.025	585.165	134.652	312.933	449.355	253.544	253.423	167.576	198.521	102.63	120.621	257.075	224.517	162.88	265.074	299.803	261.847	225.333	350.449	299.78	103.41	179.4	248.044	100.304
	126.577	309.902	114.655	371.5	125.052	299.414	165.231	325.276	467.197	453.831	250.671	178.944	151.256	113.483	124.628	218.054	249.408	151.456	254.672	245.646	303.613	423.776	435.65	382.083	93.5875	314.246	228.11	99.7237
	140.046	562.754	103.345	433.414	107.167	765.537	315.95	300.847	419.886	325.086	157.138	149.525	158.154	116.308	114.836	228.055	240.125	269.06	237.186	290.212	287.169	290.932	440	198.183	99.7083	495.975	227.895	109.862
	130.6	501.949	112.125	331.132	143.824	571.421	341.013	390.514	563.69	372.88	197.25	154.014	183.141	106.618	124.487	241.649	259.1	227.328	230.063	287.643	288.803	365.779	350.556	240.987	117.214	177.319	224.932	102.632
	91.6143	576.556	116.526	247.19	116.507	502.945	338.076	348.297	362.704	270.118	195.25	175.227	190.385	109.276	116.545	205.515	243.475	26.3667	146.48	311.036	190.853	354.412	255.172	254.91	98.924	272.181	298.529	90.8116
	97.3158	432.686	121.951	433.563	99.6944	666.534	248.44	305.582	365.247	234.59	196.721	162.676	184.932	132.38	111.059	215.235	325.63	197.053	190.983	319.321	302.351	319.934	296.266	271.328	99.642	322.793	262.581	110.338
	101.939	490.975	102.879	506	123.739	465.776	162.863	302.415	387.482	295.518	238.075	163.766	193.567	100.629	99.3077	243.983	213.078	140.754	223.288	243.383	271.493	284.328	347.942	229.493	135.016	155.813	223.352	111.462
	120.068	511.446	116.494	371.714	106.347	479.838	146.619	343.793	303.65	229.286	161.051	177.897	162.974	99.8108	102.015	234.492	395.961	248.824	217.082	277.492	71.9412	315.324	323.608	216.104	81.7917	243.717	221.308	99.4762
	121.164	510.425	126.466	339.218	101.959	604.474	180.139	344	249.761	292.275	247.804	182.859	150.494	114.606	111.851	215.316	249.797	209.974	224.114	250.303	78.5606	330.721	364.742	117.457	90.6892	88.1667	284.857	94.7162
	136.72	413.338	123.613	355.086	104.549	602.181	209.265	359.481	367.718	318.458	271.786	164.236	161.274	108.037	115.595	232.747	317.25	225.631	221.567	301.573	88.8833	269.231	315.5	343.103	103.375	243.188	267.643	86.7875
	135.506	465.848	106.5	321.088	98.2154	178.2	298.419	397.347	350.114	383.911	126.321	171.347	198.656	100.629	84.1864	236.553	407.985	225.355	241.119	295.068	69.9595	349.708	264.532	238.055	99.2125	291.983	291.082	99.2593
	100.375	325.418	117.957	486.219	134.306	484.259	299.859	253.914	361.797	466.808	184.386	181.615	153.224	115.242	111.708	240.852	253.125	274.405	263.776	303.955	114.206	201.817	645.729	304.065	94.1081	297.29	280.824	110.025
	105.627	491.233	112.305	512.966	117.838	678.279	135.108	324.927	435.382	471.731	127.514	179.671	166.397	115.658	110.449	146.239	341.069	202.831	221.577	319.71	97.1406	456.983	221.896	200.063	92.9275	334.427	200.966	108.657
	109.184	485.236	104.667	328.681	98.5882	487.547	255.785	357.422	317.933	320.473	169.481	169.679	172.359	98.0714	115.171	200.259	287.521	281.828	233.111	245.848	99.1176	351.451	428.015	199.971	97.5902	252	281.805	99.2833
	110.375	449.418	126.277	309.434	125.533	453.775	209.676	381.237	285.2	419.709	163.675	159.619	140.099	120.508	96.7636	202.342	199.848	231.132	239.846	230.119	118.787	374.474	237.208	414.115	112.506	218.492	218.307	115.235
	130.482	373.513	113.078	278.192	97.7222	189.778	382.228	365.063	337.236	344.614	158.846	170.667	155.329	106.773	118.839	199.064	265.954	215.067	158.427	270.819	105.538	378.868	272.738	187.632	107.987	349.792	257.347	96.7867
	117.305	479.413	104.054	341.987	116.786	507.431	126.524	363.936	327.95	173.323	227.016	172.721	163.656	95.1154	123.929	244.179	228.208	165.831	208.373	250.188	73.7846	386.271	331.239	232.94	108.986	126.149	297.464	117.604
	131.717	510.835	107.509	362.712	109.281	710.887	374.419	321.61	483.2	200.123	193.58	163.316	177.188	81.9103	103.235	166.625	212.828	137.276	241.308	313.964	70.4035	324.783	354.043	201.532	104.421	276.397	190.041	102.868
	107.871	444.947	119.46	305.455	117.633	608.797	445.283	329.482	315.349	195.76	227.696	159.098	154.883	113.731	117.415	243.146	179.883	255.182	275.25	326.596	69.5205	344.706	348.26	221.164	110.317	181.645	263.386	103.84
	115.405	505.472	117.736	300.675	108.881	601.246	429.493	353.895	379.329	384.414	237.559	157.162	169.831	118.883	113.412	215.651	205.051	159.897	200.303	267.961	63.1045	304.711	288.567	200.379	125.705	187.563	238.946	100.069
	130.068	516.414	129.538	334.364	103.029	441.845	125.059	328.639	334.438	237.806	131.329	146.75	163.493	108.868	126.284	227.269	163.242	202.836	143.138	234.516	74.2769	326.917	333.471	242.028	114.478	217.484	286.5	112.787
	120.254	465.862	120.869	296.38	104.322	204.321	318.316	297.927	287.051	403.684	203.41	198.408	151.757	116.765	106.744	167.276	265.42	174.297	250.013	245.108	68.4	336.926	313.5	134.068	111.137	286.539	271.355	100.451
	122.074	508.732	116.351	336	122.354	140.83	368.143	287.467	359.342	434.342	208.366	166.237	161.472	116.132	112.685	209.647	107.295	183.558	204.603	278.7	86.0769	324.957	286.456	177.321	80.7692	234.95	253.712	96.6406
	111.781	542.791	117.13	331.57	108.055	543.764	151.128	282.152	338.174	313.76	157.643	183.934	212.299	105.096	97.7568	215.961	265.723	262.329	243.803	271.553	94.3387	371.2	352.934	177.438	85.2712	356.186	307.03	98.2459
	121.974	479.492	122.482	462.3	113.61	186.907	337.814	276.145	287.303	398.667	189.357	167.584	183.265	122.485	104.78	241.466	207.734	242.111	209.063	331.416	47.5256	373.769	339.582	179.414	88.8955	344.879	245.455	113.395
	127.038	560.595	112.956	440.427	226.688	574.291	164.29	325.438	308.056	334.416	231.565	154.942	187	87.65	108.8	332.418	223.803	214.026	196.358	233.07	46.1646	245.633	290.108	174.395	115.208	254.932	258.017	108.474
	121.263	387.831	127.157	396.6	113.182	555	213.1	275.156	385.893	211.076	266.367	92.9437	155.824	125.96	112.397	194.141	222.534	301.643	195.463	246.35	60.4545	394.464	283.314	154.842	91.1449	517.013	316.631	95.0127
	109.632	460.81	125.304	433.026	160.471	620.961	309.877	312.662	326.264	372.609	200.169	161.692	162.947	106.031	117.291	229.484	201.37	234.309	197.594	270.246	76	394.868	231.734	201.492	98.5714	159.689	243.804	92.9677
	118.131	398	121.987	255.292	117.067	132.846	315.348	248.246	314.881	354.667	146.984	129.237	144.03	108.81	108.526	195.973	256.671	202.547	214.943	313.274	74.4384	324.923	310.786	216.514	89.75	158.432	251.536	110.879
	112.083	548.037	104.089	295.189	114.883	597.345	360.892	330.473	275.82	376.351	188.705	166.616	174.864	113.105	126.607	201.597	178.638	201.579	218.321	284.963	69.0862	426.22	350.733	185.444	114.5	159.284	285.525	121.575
	104.413	504.743	104.357	340.652	119.812	174.467	321.275	216.603	405.095	422.617	256.066	181.393	187.339	106.786	120.711	242.403	235.105	154.058	268.81	249.732	55.6711	339.87	172.819	255.284	88.5513	242.276	260.707	110.188
	136.787	509.622	102.838	328.886	100.559	469.059	342.2	250.233	394.767	420.279	169.438	160.167	161.203	116.869	111.688	217.222	296.509	202.467	273.051	236.704	76.4177	314.986	164.493	276.78	89.1857	209.657	257.716	108.406
	110.069	560.875	113	289.304	116.608	396.773	247.818	262.492	271.882	213.92	338.256	157.257	181.571	90.2807	115.369	240.21	297.174	221.25	282.797	239.645	56.1833	328.189	375.325	151.695	95.5823	121.486	231.4	91.825
	123.206	602	111.638	362.731	124.355	575.122	481.971	269.296	265.013	319.7	275.645	148.523	184.4	99.3971	105.086	181.315	203.969	186.97	235.158	226.397	128.648	338.456	157.857	172.754	112.107	184.944	252.814	116.298
	105.5	378.641	111.6	364.474	119.566	165.297	304.301	273.725	152.431	206.026	268.753	173.985	156.143	107.329	111.355	221.23	254.917	209.776	220.802	215.075	100.464	365.515	335.055	193.25	109.92	230.932	244.839	109.22
	127.279	510.947	115.429	330.75	150.327	650.052	296.746	261.082	332.946	397.282	178.076	207.361	176.782	117.866	115.414	174.658	254.638	253.165	253.22	239.766	86.8947	310.088	367.529	193.71	122.379	212.697	251.443	109.667
	119.275	512.848	113.377	336.949	125.5	136.857	167.879	274.414	283.615	366.076	203.863	176.813	174.016	116.437	123.26	182	238.691	244.594	244.338	224.197	116.113	400.427	282.069	216.057	117.364	224.263	254	101.926
	110.014	354.621	94.8889	334.975	114.543	695.963	258.652	314.667	315.538	407.973	169.227	168.75	165.344	109.403	110.377	179.769	239.847	254.721	170.878	274.22	82.1111	252.347	320.138	194.833	80.5357	187.881	249.662	109.224
	126.447	425.612	142.699	382.319	120.158	535.017	397.768	228.079	330.072	315.15	264.078	181.053	163.35	103.027	130.23	236.904	252.329	226.6	180.509	223.281	116.61	343.39	320.143	174.847	87.9367	146.357	266.557	110.847
	118.947	428.026	105.965	443.3	127.729	357.169	252.059	239.026	398.333	433.307	322.417	197.08	216.19	117.382	103.167	220.525	216.472	160.359	176.862	290.493	155.111	382.559	312.815	218.306	110.462	161.042	289.861	97.8025
	140.362	421.659	95.4026	354.125	133.569	138.912	298.288	283.911	349.911	402.13	202.141	166.59	172.792	89.125	113.829	245.954	300.622	257.234	233.754	258.643	135.795	338.397	165.425	221.638	98.8852	248.798	295.117	86.2632
	97.6329	530.646	104.873	326.789	104.652	688.695	347.481	288.085	438.569	343.571	262.409	185.266	247.554	112.81	127.231	252.95	224.063	182.899	219.25	260.172	172.802	375.071	324.654	151.028	97.3667	162.716	288.365	111.633
	141.232	452.457	101.339	293.446	119.883	571.295	361.763	257.946	374.909	373.974	282.092	176.382	124.123	109.545	95.2373	204.125	178.886	228.987	242.627	248.864	141.119	229.233	402.647	172.543	111.887	256.203	278.803	94.7794
	151.481	476.581	112.815	277.974	121.217	259.879	503.533	271.922	294.974	212.149	235.769	157.732	143.937	115.526	126.329	166.314	245.014	250.764	272.014	198.156	192	319.544	361.413	150.629	102.596	257.545	239.603	107.377
	126.521	611.838	95.6487	349.19	104	635.644	414.91	264.157	158.877	297.938	211.588	146.086	133.959	101.61	104.452	170.972	227.09	208.26	270.145	237.911	214.85	327.842	180.141	79.9245	97.7193	274.947	295.257	99.9872
	68	514.06	96.7761	317.556	119.295	595.237	422.348	287.239	305.632	446.439	277.2	176.494	162	100.029	116.219	203.758	240.538	307.387	190.594	245.855	187.461	366.972	316.429	184.92	111.69	316.824	263.508	106.576
	100.046	450.971	128.22	317.653	121.105	542.393	308.987	290.11	290.419	457.908	269.4	191.576	148.025	119.534	116.25	274.671	252.526	201.169	168.329	211.835	107.224	326.974	341.2	201.288	116.971	198.517	288.761	111.537
	107.558	525.793	113.127	298	119.833	168.899	327.726	286.934	399.407	134.97	204.329	202.354	155.169	107.75	130.439	186.571	196.95	214.61	240.316	189.288	199.617	275.207	377.068	135.014	114.959	193.838	270.747	100.538
	117.671	480.24	120.34	345.016	116.684	468.631	171.857	240.467	503.848	462.984	218.723	154.07	148.835	107.343	107.931	186.487	187.089	256.148	228.455	223.726	426.822	286.296	311.557	38.7018	96.4464	189.635	253.141	102.959
	114.537	433.441	104.746	303.25	127.543	585.844	418.458	258.734	330.481	464.545	246.883	146.185	160.438	116.825	111.311	192.854	225.072	199.319	270.457	198.425	131.638	331.521	276.039	240.517	117.311	275.482	240.797	113.125
	117.914	548.903	129.595	276.924	102.91	597.603	315.649	242.883	285.043	329.121	349.704	142.378	167.862	114.654	117.184	193.948	356.458	209.42	266.089	205.328	148.612	345.908	315.882	259.482	90.3289	145.288	262.431	98.7162
	94.5467	432.143	109.284	355.123	124.366	540.316	319.4	261.106	358.592	407.643	205.805	159.641	181.961	104.53	123.27	203.781	232.186	136.194	209	376.584	425.241	362.688	338.75	51.6038	93.2286	218.538	304.754	115.21
	117.455	489.377	97.8108	451.145	113.797	558.842	369.092	255.066	515.545	372.952	328.823	177.818	122.563	130.222	106.366	203.156	222.415	236.197	254.313	265.182	396.938	331.333	216.541	199.61	96.4026	180.582	298.842	109.221
	109.159	436.388	103.025	452.434	111.727	664.055	203.684	279.658	547.153	515.62	280.333	158.768	155.483	121	109.134	237.214	203.672	185.236	268.57	229.194	337.241	380.276	246.4	195.063	95.8462	140.895	290.466	101.786
	113.353	465.256	127.062	465.839	124.861	522.463	154.288	273.641	368.731	443.861	252.156	156.344	167.487	92.625	117.475	202.553	235.987	263.333	222.453	211.455	246.681	414.186	311.017	214.938	98.2319	290.176	276.442	117.262
	118.056	469	106.846	276.691	117.115	126.354	270.458	266.779	387.592	401.104	251.636	171.254	126.946	101.68	126.613	382.278	180.653	184.164	255.638	218.384	189.938	257.625	287.804	116.444	103.194	150.173	264.5	105.763
	153.247	401.658	110.824	375.097	119.557	438.803	417.761	259.162	329.113	351.333	212.896	146.288	154.788	90.9697	96.3649	198.926	203.549	194.52	185.051	201.793	286.833	322.152	253.444	190.61	122.16	226	268.492	92.6494
	126.654	499.729	104.529	265.93	108.116	610.783	228.365	378.754	338.036	321.947	115.551	171.65	159.472	131.089	119.57	167.894	228.098	214.893	181.754	202.816	313.819	427.127	233.545	110.203	95.225	152.313	265.672	103.754
	120.515	508.221	111.966	355.702	132.014	655	442.286	259.261	519.857	412.848	376.79	142.421	157.354	109.639	126.567	181.11	214.785	177.771	234.194	241.262	392.05	340.136	237.241	185.519	93.1449	164.818	248.971	109.046
	152.509	532.687	111.493	325.169	134.383	140.875	295.892	275.821	399.754	537.757	437.35	165.726	174.493	110.753	128.908	201.452	189.841	184.185	160.263	274.171	312.013	306.594	219.973	85.463	90.0789	236.544	237.658	111.513
	117.847	518.487	112.1	352.797	93.9821	588.087	227.797	231.882	486.983	474.709	237.448	160.529	145.408	102.813	102.197	182.9	233.288	291.708	252.063	205.257	141.571	321.897	234.387	94	86.4737	151.13	267.971	80.8
	123.525	573.583	125.787	369.514	117.391	362.592	328.5	247.263	598.442	450.025	222.667	155.437	155.443	100.556	111.844	239.115	192.903	282.955	221.113	200.44	324.183	299.4	232.312	91.8732	127.701	176.764	248.987	108.762
	122.066	491.04	121.015	353.847	108.585	546.838	378.082	288.333	512.843	399.811	171.718	152.319	157.213	91.425	129.545	224.25	238.771	213.286	280.625	263.667	137.627	275.983	341.224	92.1333	104.554	222.923	244.434	93.0135
	119.926	470.569	95.037	302.221	141.127	448.701	200.704	265.582	479.4	201.414	262.116	141.462	165.28	112.875	103.073	300.873	243.975	195.974	254	208.379	210.312	327.824	324.845	180.041	122.37	243.825	290.974	94.2576
	118.159	476.371	94.4783	337.824	84.3704	715.846	353.931	234.974	393.197	416.212	246.224	149.635	136.346	92.4333	104.853	302.471	131.253	144.724	209.661	380.871	227.368	309.971	334.795	205.026	99.2206	212.538	336.479	128.753
	122.233	537	98.0641	566.291	93.7344	727.824	170.03	263.38	357.486	455.526	153.145	178.764	141.654	128.897	92.8551	192.32	219.433	271.541	236.627	217.015	208.013	362.5	226.987	101.182	96.1948	193.079	259.62	130.845
	119.932	492.268	114.884	569.849	103.368	745.797	176.4	307.565	633.783	379.667	236.474	166.043	160.473	112.39	102.625	181.493	209.349	141.523	245.256	173.152	278	413.071	362.481	168.292	111.818	148.379	245.807	116.169
	121.551	399.545	111.321	546.347	110.145	635.934	264.316	321.75	434.542	305.961	258.809	150.948	147.688	112.554	95.1404	243.896	230.768	73.2319	328.903	191.585	124.304	355.368	350.361	192.145	100.789	193.222	280.493	101.722
	135.25	451.474	89.7162	468.536	140.571	630.961	438.12	438.906	355.27	473.169	498.487	165.737	173.066	102.216	99.2647	271.06	219.71	226.254	290.91	201.959	267.769	293.016	377.506	175.931	101.278	224.913	265.333	81.697
	139.933	445.138	113.338	521.685	130.577	672.076	364.85	344.083	550.9	382.387	314.241	158.969	164.676	80.4667	124.456	228.862	200.033	143.636	284.329	173.443	289.536	308.975	394.521	190.266	96.4375	170.633	327.289	96.6769
	114.463	366.886	100.328	521.931	118.105	630.603	203.114	352.612	627.697	333.782	163.575	181.81	184.529	93.6164	110.952	269.211	197.333	132.151	189.191	216.6	280.15	300.639	426.423	113.269	105.103	269.592	250.013	110.873
	99.2987	491.2	148.281	468.968	100.103	586.611	292.532	420.558	581.606	519.289	218.065	160.446	156.794	81.5526	139.016	325.089	241.494	218.897	173.452	226.732	304.525	321.382	430.227	225.541	121.125	208.257	262.271	89.1757
	126.104	338.448	102.861	417.483	108.111	477.862	207.064	359.117	517.688	471.922	255.079	160.933	142.211	112.053	142.779	250.094	244.25	129.721	300.971	215.561	272.284	334.56	383.797	218.487	101	231.178	284.886	110.181
	114.882	512.371	138.789	538.013	81.9167	460.565	471.364	374.385	529.908	482.231	211.562	172.269	157.151	116.266	105.052	205.797	207.538	142.163	221.23	210.895	309.403	344.919	404.034	146.242	105.122	190.813	298.172	82.9211
	103.138	507.028	113.392	505.397	112.158	553.25	403.618	300.013	616.25	531.436	302.381	161.217	152	104.877	110.617	249.525	185.333	203.753	243.551	166.608	268.559	337.232	339.37	143.897	119.287	186.886	296.658	93.3971
	108.29	502.082	87.7949	548.322	118.719	711.274	469.29	329.455	491.85	522.38	331.724	156.932	180.033	95.2879	132.11	286.632	198.076	208.462	182.649	211	284.533	543.121	408.268	217.879	128.213	166.26	297.923	107.4
	117.099	425.695	121.607	449.877	76.1324	576.581	106.443	307.592	575.419	545.846	179.028	175.933	143.824	92.7727	106.074	307.691	200.973	56.2879	231.282	219.794	107.983	397.885	345.5	235.213	103.26	214.153	257.354	115.304
	117.583	452.493	120.121	528.235	119.578	332.224	140.356	366.108	586.386	565.519	179.641	186.657	159.164	98	138.134	267.459	254.59	42.25	271.808	236.637	300.704	323.391	319.633	135.324	109.611	114.491	270.29	110.392
	116.079	382.61	128.258	545.233	106.778	622.103	114.627	376.339	355.306	483.835	206.323	155.375	158.362	116.391	124.691	340.029	208.592	64.5789	198.785	190.548	287.526	351.849	337.24	194.5	102.014	205.361	361.109	103.699
	90.1772	442.551	112.492	478.93	119.136	565.906	336.508	293.625	445.305	420.452	278.214	157	166.887	92.8519	114.712	180.985	193.052	276.453	270	183.784	303.833	371.586	299.553	176.2	115.485	230.342	200.716	108.859
	115.945	541.328	89.1552	376.295	118.566	595.14	123.148	400.013	657.814	158.934	267.986	174.03	175.091	86.7333	116.712	243.403	218.821	142.217	245.103	236.465	286.639	293.818	307.603	228.377	93.8592	195.557	241.426	101.262
	108.78	337.298	113.327	429.192	121.923	636.041	116.038	335.974	505.947	440.632	243.316	152.147	149.647	95.2805	130.894	222.653	213.194	111.985	265.897	207.957	172.258	414.135	254.149	206.409	99.0139	186.448	256.833	114.213
	112.303	460.207	98.9306	416.176	114.185	655.438	154.792	296.052	674.367	397.448	341.215	185.636	151.579	111.468	114.684	252.354	160.917	68.3103	257.493	273.708	162.209	360.212	375.427	200.805	118.382	213.113	323.059	114.446
	120.684	389.877	104.783	489.85	115.03	270.393	133.431	377.743	507.971	252.268	342.938	157.491	167.275	120.176	132.692	294.517	247.591	49.1831	232.307	350.561	234.712	337.526	148.969	211.867	107.018	221.127	278.277	98.2787
	104.175	456.894	92.4815	464.355	142.388	607.313	144	439.427	581.408	392.75	138.083	156.203	166.181	106.228	118.942	273.765	179.733	79.5441	200.29	165.313	209.487	369.403	311.373	187.406	110.088	173.91	271.462	111.821
	110.338	640.377	85.2603	404.133	111.127	760.779	131.699	334.325	496.783	619.564	225.061	164.958	155.652	90.8571	135.986	232.436	343.652	63.2895	262.712	191.843	287.75	333.987	414.958	275.873	91.4098	232.81	302.808	96.9875
	112.444	497.518	102.291	511.208	127.918	679.838	111.813	344.825	209.729	642.82	237.868	175.717	152.676	121.421	104.877	271.644	275.291	191.182	253.194	356.985	265.81	296.06	297.563	228.409	97.4923	280.073	312.031	102.414
	112.621	426.333	132.974	512.104	147.373	640.94	120.625	343.493	287.544	278.221	236.857	67.7377	169.776	102.473	129.889	327.384	245.284	78.7179	276.243	372.053	304.481	346.562	481.262	113.348	100.898	120.397	249.623	112.053
	118.603	469.211	102.471	420.639	126.306	611.225	158.74	309.141	415.593	522.458	295.759	231.372	154.227	94.0441	106.292	380.5	246.053	70.5	254.937	336.288	338.732	247.867	384.569	193.25	108.741	227.065	302.69	93.4407
	156.4	411.982	123.789	383.014	118.685	545.152	168.549	364.77	323.087	276.727	261.029	51.7895	170.2	100.092	120.403	168.884	257.634	67.7051	254.395	217.553	288.517	340.4	281.014	162.297	113.632	175.273	261.158	110.573
	105.268	431.716	136.558	540.127	95.9872	515.864	134.303	370.092	279.986	514.828	258.907	191.042	155.328	94.5976	113.108	236.464	132.381	254.763	258.682	439.667	321.75	317.382	847.786	199.5	105.108	211.371	401.724	105.514
	110.436	447.182	133	376.622	122.538	578.783	119.213	299.825	325.577	470.929	244.097	134.582	182.414	103.049	143.136	265.696	238.04	238.097	260.732	301.886	255.864	296.608	210.026	158.217	102.013	259.029	289.431	96.5916
	125.049	424.493	138.039	397.346	109.569	547.987	122.072	326.961	253.312	174.642	360.2	170.508	161.961	112.449	125.694	253.676	265.932	191.125	218.763	188.79	104.962	278.044	188.729	164.205	101.547	202.767	274.938	106.973
	110.417	466.814	129.887	447.263	113	542.215	118.375	294	339.908	512.721	559.932	162.915	140.821	108.322	114.194	286.179	304.205	204.214	273.848	292.279	107.519	330.705	333.422	134.787	89.5616	188.236	241.373	111.088
	113.155	321.257	108.433	516.708	112.127	424.172	123.066	405.09	281.968	332.181	231.354	130	149.264	110.387	105.675	326.217	148.061	218.224	261.279	241.346	101.043	426.048	245.583	170.389	99.8136	129.356	266.72	104.475
	111.507	478.328	134.027	461.933	119.342	524.772	126.719	329.113	262.568	179.164	279	165.421	182.113	94.4386	121.457	338.513	306.173	223.076	218.909	341.226	136.353	360.395	407.967	143.841	88.3623	220.329	222.864	104.727
	119.881	449.831	145.662	411.658	243.517	690.657	159.792	322.533	324.817	367.828	207.259	134.625	149.1	101.682	137.576	380.513	201.233	265.986	254.725	274.407	112.851	378.541	326.716	119.056	99.6487	93.9077	305.656	108.319
	135.493	342.295	230.218	492.233	163.179	481.914	109.923	261.87	291.545	335.154	366.967	157.688	151.673	110.389	127.872	224.854	262.662	200.449	297.716	232.842	126.176	468.333	224.847	133.924	126.157	41.1404	232.212	111.658
	159.957	414.479	120.287	446.387	153.716	531.554	130.111	292.803	302.182	557.655	248.582	152.845	155.442	83.3099	115.088	212.735	247.303	188.159	207.987	347.274	504.484	363.671	134.293	156.508	91.8228	116.566	263.615	93.1176
	166.042	346.239	196.154	469.411	88.2687	459.547	145.338	327.463	232.322	449.328	249.2	142.5	152.714	98.4308	127.776	243.386	230.045	197.556	268.935	248.312	92.7407	380.595	323.968	177.167	86.942	116.797	237.233	108.113
	144.69	492.4	187.577	341.211	95.8831	609.582	118.575	361.886	359.406	440.269	273.477	145.26	151.034	106.013	96.6753	244.61	346.033	166.974	164.242	336.507	129.945	417.929	312.432	140.747	100.013	223.254	245.437	99.7833
	158.649	536.333	110.494	339.025	231.352	627.103	122.481	336.704	365.424	442	227.763	170.521	168.042	111.579	115.746	222.838	253.982	133	240.936	194.623	135.018	383.965	430.754	192.31	72.9091	157.846	247.441	97.359
	124.457	510.692	125.286	373.913	107.933	674.961	129.724	308.955	324.085	344.066	313.388	155.238	247.298	99.7215	114.338	246.797	303.09	172.324	250.2	307.549	105.589	332.838	391.961	133.94	101.672	142.678	237.887	95.3158
	148.975	298.014	73.6	375.214	111.924	570.577	394.325	348	286.913	450.188	318.773	182.134	181.803	95.6271	132.157	301.787	292.449	298.723	258.818	276.705	213.779	375.164	186.329	172.419	111.073	105.031	272.25	109.864
	142.224	318.393	125.386	624.213	149	535.556	112.265	314.324	243.104	504.417	349.662	137.65	151.178	105.039	136.113	271.988	188.561	104.5	253.422	263.902	185.653	280.595	218.818	195.679	91.6333	134.595	242.962	114.813
	124.357	257.592	115.794	468.253	123.152	675.389	132.753	309.903	314.833	370.607	335.09	127.688	180.393	111.638	112.719	239.943	279.865	214.347	273.5	244.603	96.8302	285.662	261.644	221.683	102.051	289.607	279.776	100.406
	146.684	262.984	117.443	426.328	94.5	662.295	128.152	357.382	331.983	564.141	188.526	163.25	162.042	99.8939	113.025	250.209	248.39	229.157	168.054	263.934	102.788	247.434	320.36	130.108	101.709	121.169	292.688	121.117
	124.85	265.356	124.408	441.346	193.206	475.88	169.887	277.587	354.431	492.436	339.438	139.443	159.092	96.0602	122.553	251.295	426.375	152.949	190.882	278.025	94.2375	308.545	346.897	187.985	102.864	680	263.974	125.866
	165.077	268	113.297	350.743	156.159	490.671	139.082	339.227	388.569	717.386	261.627	155.054	161	100.063	137.013	239.16	209.13	138.983	245.446	320.867	78.92	446.23	335.932	169.379	102.099	330.406	255.852	113.63
	147.768	267.584	157.947	369.628	191.711	443.782	145.753	251.889	399.29	239.515	251.889	159.159	163	111.338	112.862	254.553	242.733	160.652	248.158	337.646	90.7206	311.771	353.564	197.09	113.828	168.5	287.275	84.6076
	145.446	259.063	127.544	348.933	138.395	276.462	348.926	383.588	319.175	104.773	199.851	35.8167	139.083	114.107	139.791	224.25	244.551	204.015	205.933	227.757	66.5577	458.246	220.04	167.982	111.712	301.23	367.581	101.362
	139.086	255.606	116.127	405.082	180.6	519.254	103.351	324.063	357.75	245.115	433.816	163.114	161.712	95.4125	125.564	233.22	256.822	131.377	224.329	306.3	86.4754	362.881	256.875	118.314	110.43	439.632	221.13	106.765
	138.535	294.275	105.636	471.318	174.618	510.03	171.107	301.054	324.725	388.982	232.328	177.853	190.847	110.026	126.06	241.671	240.403	294.118	247.259	298.121	91.9429	194.893	93.3636	106.714	105.701	137.622	251.667	110.373
	107.586	267.556	113.333	442.548	193.714	450.487	129.905	270.324	281.672	432.662	419.597	175.222	132.203	115.474	139.857	265.155	252.115	211.308	298.623	295	83	299.381	159.271	101.356	82.9833	255.467	225.778	106.256
	132.84	271.641	147.79	444.973	106.957	337.356	175.373	305	337.313	248.597	465.71	139.479	151.785	109.589	103.263	263.075	266.7	137.267	250.792	224.217	88.3833	283.114	306.085	156.949	97.4198	553.949	256.397	101.595
	113.577	331.25	95.7273	373.788	162.205	492.391	145.586	278.561	331.57	233.081	495.603	166.982	156.434	108.338	116.643	269.169	253.367	256.113	267.141	304.733	111.383	389.966	251.935	144.429	100.618	643.109	302.774	101.734
	149.507	265.295	114.122	522.036	156.358	680.037	269.305	329.667	361.455	253.667	623.767	143.538	139	99.6528	111.162	277	277	230.617	290.382	297.457	70.4848	304.814	241.561	152.533	90.6267	355.104	264.065	82.7627
	127.092	304.054	126.046	552.69	144.961	447.5	134.118	238.803	414.494	350.025	188.835	152.044	179.14	83.0519	113.559	286.895	280.354	173.623	290.44	272.4	80.5846	271.362	233.367	122.188	101.181	264.521	215.286	90.3529
	155.2	280.487	107.299	366.042	151.404	490.661	106.718	217.631	262.125	317.756	285.786	147.018	150.955	113.017	152.064	265.055	253.967	231.046	256.905	338.75	71.1875	329.812	469.736	192.122	100.288	292.125	266	101.344
	160.25	317.692	132.081	509.808	108.129	688.194	135.565	289.569	490.729	410.221	236.029	24.8	169.554	126.485	110.883	353.154	346.737	162.384	175.787	276.948	77.8197	201.212	305.11	95.625	117.386	314.632	290.2	104.931
	129.053	301.547	127.052	324.912	149.923	521.014	160.768	264.145	460.705	423.914	241.641	145.136	131.866	110.177	95.3026	238.469	250.093	212.105	278.815	373.145	99.6066	323.536	463.478	111.721	113.056	397.116	242.695	119.111
	117.675	260.091	123.792	329.852	153.194	680.531	162.43	237.895	303.612	457.232	241.884	144.882	157.536	90.8103	115.962	250.054	249.759	199.544	284.071	331.453	88.1406	401.371	499.945	127.643	107.03	348.841	237.656	97.3571
	115.747	254.181	115.7	377.714	96.557	662.646	125.93	260.888	303.772	322.219	298.5	156.6	158.885	110.139	121.191	277.607	273	190.951	223.753	268.395	100.838	294.817	560.494	258.101	101.039	224.247	253.55	125.154
	141.534	227.683	87.9481	310.052	166.58	695.493	164.29	349.631	266.348	334.413	311.088	155.114	140.321	111.397	132.873	260.53	246.348	281.463	239.105	273.177	73.3387	369.177	414.836	116.149	121.458	180.125	269.118	96.0685
	152.722	257.768	112.974	501.297	87.7541	613.88	160	283.846	382.607	313.58	401.067	150.303	149.649	101.4	115.829	258.418	235.164	201.642	278.2	293.753	86.7193	374.849	514.769	197.718	120.911	607.613	253.222	103.382
	135.2	267.632	108.571	495.583	86.087	495.268	132.82	249.154	491.39	129.014	259.638	163.387	160.465	111.418	119.71	289.212	220.833	207.262	273.961	370.945	69.4697	397.329	545.385	224.348	94.1467	280.923	205.089	105.076
	145.046	252.139	116.122	515.347	182.468	512.683	130.822	258.643	257.155	303.616	239.896	170.7	143.068	94.6164	117.417	319.941	197.908	200	219.246	387.573	96.5172	423.316	339.173	144.854	104.946	212.286	268.52	105.565
	175.216	290.924	110.535	447.783	140.338	684.351	149.875	300.871	429.69	313.839	418.821	144.803	170.25	75.4935	118.014	316.899	286.519	188.905	234.328	309.987	80.0649	383.597	357.806	140.167	100.083	337.716	233.026	95.371
	150.889	279.475	112.964	413.254	133.97	502.714	103.271	245.582	359.573	382.988	551.148	170.986	162.911	108.892	124.188	287.764	252.395	204.169	255.909	304.848	80.7568	311.533	462.859	131.662	110.933	199.658	242.684	98.9138
	127.093	266.861	50.4474	487.196	148.794	707.557	406.759	288.608	451.429	306.443	162.435	48.1733	171.052	86.1936	136.486	283.539	222.877	156.632	223.12	341.821	80.1692	300.986	275.782	165.014	105.289	305.053	283.28	102.982
	131.697	296.067	104.278	452.365	146.739	503.709	342.156	293.948	549.632	337.421	618.577	145.679	166.973	107.671	98.0847	256.14	268.828	138.829	341	384.947	60.0746	286.839	441.974	259.787	95.9583	277.5	242.895	108.303
	157.974	224.885	104.031	398.342	130.705	505.857	128.076	382.944	394.638	273.308	370.165	144.494	151.818	83.35	117.359	233.82	358.6	113.43	211.719	269.658	79.6897	215.015	294.228	148.3	94.1772	262.5	264.528	103.493
	127.897	248.831	108.351	344.364	150.933	95.0357	117.056	258.649	485.367	371.685	411.868	149.13	147.663	107.368	128.037	227.293	237.833	109.351	252.055	206.386	60.3158	294.592	315.544	207.089	97.7681	162.304	285.059	118.795
	137.595	242.556	123.662	405.96	149.917	141.246	124.595	300.803	416	443.194	569.924	184.972	158.081	104.433	112.188	250.083	281.054	137.822	271.385	229.254	75.7681	343	531.235	193.893	107.153	299.741	245.563	99.7333
	168.553	297.577	123.094	335.013	159.95	78.4118	119.227	298.196	479.377	419.564	385.875	152.136	75.5667	106.8	119.54	244.907	252.429	117.582	256.161	262.597	70.2647	278.959	502.653	149.627	100	399.684	254.805	107.214
	126.156	275.766	112.912	332.62	162.464	70.3973	216.197	255.103	354.55	405.689	282.275	154.012	141.338	105.23	102.287	304.353	223.525	114.389	262.41	279.696	77.1111	358.339	285.059	159.135	109.221	227.28	220.75	91.1268
	134.679	286.885	138.524	405.927	129.95	124.108	189.932	239.015	369.667	228.474	500.921	219.515	130.964	111.772	115.312	247.984	222.982	108.033	225.27	315.897	94.75	460.345	317.017	271.167	97	210.319	274.983	104.658
	138.934	250.5	113.361	536.877	124.031	78.3158	128.077	477.014	367.088	357.962	203.486	155.31	174.203	118.103	134.774	263.481	256.092	209.479	300.042	224.082	76.0128	415.071	311.897	154.323	110.788	288.439	259.722	127.579
	131.196	264.219	125.521	432.864	139.889	108.356	130.108	583.415	620.042	356.347	279.94	154.461	163.346	108.427	102.701	347.983	258.103	53	227.766	241.814	44.4627	407.667	586.743	191.575	95.5467	225.636	303.797	108.61
	144.704	267.271	124.935	380.707	130.483	99.3289	109.05	406.671	636.069	365.923	232.868	148.071	148.974	90.4828	113.377	338.3	210.744	118.78	252.365	285.115	77.8393	217.337	439.167	169.584	108.955	246.653	222.517	99.925
	122.108	290.434	114.909	545.455	135.767	78.2162	137.845	383.5	463.026	350.136	230.321	160.753	145.246	111.167	103.971	199.375	199.467	49.8125	263.189	312.731	176.893	337.233	337.422	178.508	101.667	248.97	236.532	90.0886
	105.808	248.046	102.831	413.268	153.867	86.4247	144.403	516.067	234	350.594	362.152	156.433	144.419	96.4615	109.913	211	216.29	290.618	251.508	288.066	126.813	359.028	402.296	155.629	116.974	160.975	292.519	114.538
	119.934	295.971	84.7286	395.414	131.318	81.3714	157.897	352.884	585.684	186.492	377.879	164.273	151.613	104.103	120.276	272.959	244.449	261.663	280.471	325.808	133.824	256.788	555.461	177.74	94.6429	202.153	216.819	136.338
	144.394	250.26	86.36	440.185	164.818	85.9487	138.118	284.462	539.339	250.317	556.662	191.97	149.795	106.046	118	243.595	213.123	353.256	267.333	337.589	136.494	369.091	376.892	181.736	70.6301	182.569	279.816	92.7838
	139.342	279.179	112.553	418.118	163.879	60.2329	165.254	427.253	531.467	262.571	306.825	162.348	148.364	103.829	132.878	265.919	247.07	295.419	293.987	292.514	77.7662	414.13	321.986	159.109	102.052	254.541	250.697	101.304
	185.014	246.348	125.514	409.932	137.224	134.15	135.293	406.819	607.792	461.983	591.196	154.462	157.304	105.534	116.883	223.922	227.697	294.5	273.319	253.731	102.61	338.18	623.563	212.159	107.839	146.192	239.948	91.5352
	151.015	284.971	119.035	367.707	151.041	54.6406	93.9688	441.374	500.208	401.148	407	148.429	133.42	85.8667	133.214	309.276	269.413	287.027	275.183	233.25	74.8333	373.409	419.178	143.776	95.1579	153.731	252.848	116.085
	105.066	293.104	98.6538	300.164	140.8	43.6875	167.215	353.145	376.933	315.313	219.196	162.915	144.163	93.2759	116.768	240.44	266.462	301.922	223.018	233.962	142.271	340.224	362.684	206.3	98.4156	148.196	296.951	113.953
	161.81	268.208	130.959	375.347	130.061	56.8182	153.613	381.5	547.372	277.947	227.853	192.961	171.816	91.1071	125.347	227.872	224.296	267.05	169.892	294.606	173.969	306.6	343.493	156.486	100	376.857	281.203	85.5844
	119.153	288.724	109.611	329.986	143.707	44.1333	369.403	402	520.515	143.141	215.909	165.812	171.169	91.4247	111.945	211.662	238.378	342.416	208.56	280.776	176.92	279.014	525.102	208.649	88.0735	220.582	292.098	99.3
	186.375	260.986	111.293	420.415	180.068	62.2113	126.919	444.781	526.718	306.29	314.986	150.712	173.424	111.605	103.637	261.679	157.75	276.091	251.299	302.07	117.139	204.739	462.533	163.826	122.159	343.342	257.704	97.029
	154.074	251.218	125.766	350.971	116.171	71.2821	349.107	338.573	649.309	287.407	286.974	147.122	153.405	124.883	121.618	270.345	214.066	207.851	202.577	308.811	146.513	309.418	319.053	178.911	112.712	214.468	245.614	110.538
	102.895	247.25	98.0714	369.419	141.825	142.983	122.339	352.368	613.849	274.152	332.433	159.479	180.269	98.8243	106.387	279.091	210.873	228.678	223.833	265.375	176.897	327.824	483.623	193.25	114.479	150.187	239.382	99.641
	153.241	259.177	114.887	345.754	137.705	168.067	155.426	418.551	492.788	334.987	486.886	140.96	173.986	112.416	119.149	193.5	215.053	260.944	244.361	250.152	134.877	309.151	410.329	155.067	90.1324	259.333	217.487	107.429
	139.077	256.912	104.816	361.923	149.324	102.231	136.338	513.351	494.459	477.922	464.922	153.919	157.509	119.946	119.986	208.136	218.38	283.75	252.329	224.519	150.696	354	314.477	197.766	114.424	153.288	269.612	102.608
	118.804	257	101.041	386.548	121.513	89.5294	186.714	387.274	667.012	350.844	454.459	144.371	133.156	102.23	120.844	218.387	207.29	227.354	243.694	270.75	313.351	362.387	411.75	124.069	101.636	257.934	265.554	118.295
	128.387	287.507	115.013	294	168.507	132.463	137.145	503.316	638.423	404.333	434.222	139.743	161.88	105.689	115.566	213.372	219.772	247.25	203.736	248.051	351.734	418.833	437.286	189.821	103.231	202.75	191.654	104.5
	140.772	252.506	130.464	279.632	121.5	118.6	119.61	336.087	349.446	400.481	546.494	165.949	142.683	117.947	117.958	210.369	217.39	229.139	255.649	363.738	139.915	322.607	385	142.242	86.1351	264.797	256.784	101.263
	136.406	282.149	105.956	333.922	162.833	134.904	425.562	313.919	589.508	376.763	592.029	143.821	141.947	101.689	113.169	226.538	224.532	246.789	207.908	269.176	238.472	310.169	458.382	137.273	109.25	198.81	237.617	79.9848
	112.036	261.313	99.1356	416.577	132.314	166.278	161.554	307.343	641.673	315.203	203.167	152.804	166.773	123.692	108.406	233.077	303.753	276.5	291.429	312.411	178.733	306.286	366.833	219.4	106.037	176.973	266.264	94.9167
	124.507	294.897	116.987	514.557	139.577	121.389	133.169	394.313	494.295	289.4	324.382	169.842	140.234	105.197	125.286	290.464	296.571	253.527	252.246	246.015	386.244	314.726	311.986	154.6	114.776	175.111	258.587	82.2027
	132.045	261.266	129.61	503.433	134.304	153.632	121.853	446.267	476.891	330.091	249.193	168.806	171.367	123.595	103.321	235.471	196.014	255.237	248.781	266.313	175.169	391.162	533.74	130.545	98.9661	159.09	207.388	116.721
	156.622	276.923	107.152	312.133	143.064	119.167	132.2	327.209	562.438	320.605	253.707	160.013	183.868	102.658	111.211	272.855	235.658	189.9	223.403	219.912	313.372	316.203	438.714	153.429	93.9726	313.986	342.329	102.102
	179.154	255.597	111.571	409.194	121.589	99.2281	123.735	386.386	707.903	250.394	533.655	151.158	139.582	78.4474	120.282	272.577	189.651	202.623	268.592	298.947	308.357	275.536	201.737	191.681	86.3662	250.229	287.443	99.3165
	186.421	266.942	110.864	450.616	142.783	142.857	123.696	356.632	618.397	365.747	276.461	176.974	147.738	99.9286	108.943	325.6	243.25	253.473	336	272.589	119.779	317.306	210	158.821	118.05	191.125	242.975	96.013
	126.017	257.397	139.156	424.462	111.786	85.0192	110.465	437.293	613.614	414.975	163.929	168.541	144.539	115.264	114.609	318.778	242.11	228.431	262.475	289.39	359.697	344.167	298.487	162.121	116.325	208.879	312.551	123.373
	137.958	254.167	111.623	602.82	168.017	102.731	144.932	396.89	418.614	343.705	572.985	217.729	147.43	105.744	99.3333	172.35	220.986	251.857	245.493	303.5	309.279	387.07	367.886	190.708	81.8125	235.671	238.481	109.333
	146.837	252.086	112.731	481.551	162.471	124.456	117.974	319.345	164.143	412.243	616.292	169.928	130.869	108.583	111.329	233.586	281.587	198.286	287.109	266.722	382.538	342.036	329.725	125.394	91.4098	293.87	293.859	95.0133
	126.016	275.246	108.291	389.646	152.759	125.835	144.09	473.295	318.723	394.429	234.288	148.786	159.648	96.0278	114.183	177.016	179.485	215.594	291.412	288.587	320.3	381.282	401.831	206.684	106.826	267.767	222.971	123.603
	123.703	277.912	103.5	384.313	117	130.871	103.587	497.041	258.158	466.935	308.848	141.714	182.644	107.075	116.185	198	204.471	211.031	236.862	330.145	183.437	394.438	464.633	158.125	95.8095	127.147	245.017	94.9545
	139.707	262.698	116.045	355.178	142.483	170.711	130.492	336.772	172.227	365	277.421	162.855	171.875	98.9464	132.911	196.5	221.797	166.132	198.704	288.381	163.274	305.493	394.787	154.26	97.4306	226.042	233.351	105.105
	121.176	251.672	108.882	489.6	116.3	122.083	131.986	437.047	245.221	468.686	164.823	154.363	148.547	88.0139	103.929	259.272	211.172	206.338	196.486	265.852	99.0694	352.133	420.133	223.089	91.36	149.085	236.741	103.107
	130.386	280.311	90.2923	406.048	106.5	90.9231	143	383.971	184.781	411.263	448.758	154.6	139.195	107.23	146.175	290.188	238.303	199.649	240.286	323.867	360.857	393.108	301.552	198.235	87.6567	140.143	379.475	106.227
	136.587	265.984	104.088	310.387	149.938	127.574	127.75	408.493	252.107	365.075	523.973	127.982	147.75	110.813	105.346	263.879	301.278	236.227	169.753	292.3	323.729	339.525	249.562	174.824	115.696	138.587	239.853	120.741
	141.508	269.667	97.4576	349.544	154.369	180.5	94.6301	450.714	202.319	373.143	666.5	165.487	174.214	110.486	121.117	277.138	255.123	210.377	282.018	288.169	278.304	375.805	284.224	95.0128	105.079	166.8	257.917	102.89
	125.57	233.279	121.617	376.742	133.897	160.814	122.026	476.714	315.102	131.421	467.1	160.321	147.271	107.52	121.059	229.042	203.13	185.724	301.149	249.368	297.932	405.179	339.079	104.511	96.1781	103.803	263	106.333
	128.932	207.592	117.632	294.91	119.603	106.164	93.7794	405.08	234.284	374.579	503.421	136.881	151.974	118.053	108.937	212.875	207.863	208.227	212.345	341.689	315.655	433.859	340.1	89.0519	109.958	165.068	212.439	98.0125
	123.357	255.763	100.106	330.375	161.627	137.483	117.275	293.939	212.556	437	502.828	125.959	157.173	105.603	120.763	283.844	164.197	178.895	260	193.932	281.893	376.282	411.781	108.024	115.123	146.987	228.88	99.924
	100.035	242.667	111.861	266.9	91.1493	124.095	108.947	449.432	267.532	272.971	394.214	153.679	162.069	108.675	130.947	221.571	202.986	385.149	231.373	330.5	269.867	305.574	378.371	119.631	94.2949	204.125	258.662	117.823
	137.111	253.309	108.519	399.542	93.1552	93.2029	32.6721	372.94	251.701	349.509	537.5	161.04	137.571	89.7089	115.612	239.92	216	333.677	220.469	301.383	107.6	362.367	394.085	177	100.487	241.797	232.649	106.662
	115.224	263.071	128.73	376.633	200.025	56.3824	161.955	298.338	316.397	353.684	508.944	164.608	156.179	100.273	122.967	223.182	165.603	385.468	288.279	276.377	183.658	304.797	389.695	205.987	110.9	205.623	269.812	96.5789
	132.232	289.792	106.231	356.333	157.509	138.368	112.091	390.924	201.848	440.632	595.628	174.564	166.767	114.618	124.813	192.05	226.013	303.7	209.462	257.5	297.939	304.017	483.872	197.569	106.086	259.487	198.363	78.7013
	139.662	269.75	93.9589	377.265	155.603	537.672	85.0448	324.77	442.828	166.233	317.974	175.319	169.441	112.129	111.655	215.015	243.015	237.316	189.354	225.269	259.476	390.617	286.346	189.952	112.585	116	239.11	91.2466
	127.131	245.565	115.102	483.487	98.9545	133.308	114	386.164	340.855	529.385	376.342	156.405	176.375	91.8814	102.316	222.789	272.899	247.025	262.618	303.838	130.642	295.808	285.533	132.778	99.5152	127.985	257.985	108.923
	125.613	268.471	116.918	439.949	138.582	164.667	121.385	352.135	293.027	279.328	442.466	162	168.162	103.681	115.013	214.506	213.264	250.244	293.696	314.286	90.4286	358.067	320.288	265.101	89.875	394.016	279.304	90.8194
	129.719	265.449	104.082	358.027	140.725	383.169	143.162	289.667	99.5867	316.855	480.182	157.716	157.034	114.625	107.662	208.794	206.514	231.831	220.188	260.147	177.103	329.077	427.671	231.897	109.525	233.271	244.328	121.22
	139.234	253.677	122.962	326.59	145.169	85	94.9508	537.634	394.25	295.859	688.4	176.8	164.908	100.076	104.279	223.797	213.031	245.355	288.471	313.272	198.789	299.697	272.107	187.506	107.857	219.984	220.263	111.025
	111.753	306.688	106.397	331.986	152.03	109.234	126.074	357.311	254.62	261.161	591.949	186.788	147.75	97.3974	113.471	223.614	209.905	249.333	282.898	229.684	500.766	335.412	342.507	184.773	86.0946	184.038	278.105	97.1884
	120.612	247.269	124.5	314.855	128.423	118.275	110.812	359.085	226.776	115.982	483.028	135.596	148.324	104.48	111.463	269.781	166.5	256.974	222.371	208.628	89.1786	347.529	192.854	135.22	122.547	210.024	229.823	97.541
	121.901	215	95.8846	301.329	145.746	56.8636	132.19	400.845	386.596	334.821	577.364	187.7	157.246	100.063	109.38	307.273	212.359	246.387	212.562	270.355	67.25	386.292	307.017	222.719	90.6494	355.044	270.12	113.278
	143.394	275.667	116.327	276.804	144.841	699.885	118.767	341.459	267.836	303.7	156.705	172.516	168.354	116.781	129.305	309.987	218.868	263.017	198.896	247.221	204.938	345.519	366.569	198.939	104.25	315.149	244.596	107.338
	140.453	255.879	84.9016	313.375	135.284	132.704	46.5385	324.203	377.104	375.231	489.05	160.921	169.174	102.25	113.082	199.947	205.542	156.26	292.441	234.27	411.548	357.104	393.492	183.587	91.1936	316.261	239.963	86.6818
	127.328	241.141	101.171	328.862	139.6	94.7721	70.925	323.868	553.914	374.184	322.696	155.027	144.375	90.6267	113.81	206.208	153.464	147.069	247.318	260.948	193.652	312.046	393.079	214.629	103.61	214.114	222.522	98
	118.718	220.628	96.8036	363.278	137.86	166.316	84.0395	296.579	462.888	142.11	466.667	43.7895	157.962	102.833	142.579	244.711	103.354	272.889	211.071	232.971	185.744	300.297	307.873	139.531	94.3289	194.911	248.589	109.588
	127.667	263.2	119.768	406.605	113.875	214.724	130.506	326.377	186.279	360.117	592.177	188.041	197.739	101.5	115.881	208.97	318.117	215.417	280.971	289.29	141.667	546.038	359.789	211.203	104.382	233.868	234.446	111.36
	124.558	239.685	98.2881	479.771	106.386	68.5283	118.031	405.443	179	406.5	477.165	171.288	188.563	100.797	121.5	262.594	243.282	266.987	260.481	300.617	270.649	420.788	377.205	155.947	106.855	181.961	260.538	80.619
	128.562	273.447	99.4675	491.068	124.966	121.547	97.8769	467.313	290.288	416.579	307.053	162.627	156.351	89.32	105.291	252.789	272.554	341.308	192.662	263.937	303.551	456.439	306.826	167.763	85.1389	263.342	279.803	122.452
	114.29	318.261	100.103	452.948	141.568	124.66	106.882	531.487	435.397	397.302	691.183	135.863	189.123	97.5588	102.829	244.85	266.407	197.557	256.232	245.014	281.183	414	301.135	244.333	81.8276	145.966	351.143	111.895
	105.744	306.81	113.983	410.329	138.518	97.3214	127.316	413.538	198.203	337.653	372.103	138.564	187.828	102.293	118.785	273.571	349.11	237.173	155.795	241.855	383.6	339.64	302.408	146.675	102.186	296.923	235.776	89.125
	96.5357	248.013	100.738	431.11	109.588	105.606	107.333	302.836	404.612	336.164	466.028	138.816	167.716	93.4304	113.947	201.737	299.138	252.387	239.59	237.373	317.592	380.474	314.943	158.439	104.716	193.531	202.768	114.461
	124.14	245.268	115.597	286.567	134.333	103.896	77.2121	506.216	365.313	422.597	642.277	169.6	138.418	106.2	128.492	218.773	249.176	278.237	279.094	297.169	332.636	216.414	205.382	180.176	107.436	226.983	320.78	90.1029
	127.97	262.667	132.954	392.092	125.062	84.4559	135.159	476.896	503.319	530.333	606.789	196.228	153.556	97.4878	114.644	183.269	303.253	253.458	213.155	252.262	316.293	322.929	396.091	103.305	97.7353	181.431	226.185	95.9726
	123.797	249.907	107.838	348.986	110.697	113.203	129.667	461.371	793.261	144.693	643.948	183.58	141.186	105.753	93.6053	193.487	316.125	277.373	188.949	267.017	146.407	393.054	257.169	171.936	93.72	116.171	246.945	90.4384
	118.118	295.672	93.7533	345.709	163.557	138.03	36.1014	473.125	634.646	231.219	523.662	154.657	147.532	94.3846	117.526	211.329	247.053	313.675	209.607	261.025	234.723	292.779	319.848	191.286	91.4746	281.039	238.725	98.3158
	109.159	260.056	102.889	387.573	134.561	550.724	101.689	539.629	398.579	315.675	387.164	160.769	144.945	99.4219	118.056	250.861	277.59	261.654	209.13	264.2	251.387	360.879	340.382	142.727	94.3167	162.467	261.053	118.139
	151.269	238.972	108.045	427.091	145.699	114.535	106.113	443.865	590.067	435.127	514.246	153.397	152.426	92.1186	122.623	317.378	234.075	250.041	234.152	232.256	267.049	409.938	268.528	161.096	116.562	266.945	272.262	85.5763
	118.364	295.11	103.826	366.394	121.887	79.25	88.7333	450.571	221.371	397.368	473.373	177.266	175.068	124.234	114.141	212.5	309.328	133.088	210.36	249.563	63.9615	283.561	341.207	145.625	115.756	198.395	251.786	94.7333
	112	273.71	105.696	437.154	129.205	614.203	119.092	461.57	295.836	472	543.068	176.101	145.026	99.629	91.5676	232.288	256.56	242.962	268.446	230.394	118.5	331.116	309.691	153.659	109.793	105.609	297.355	118.793
	115.525	275.719	100.918	467.053	140.746	178.062	109.434	484.246	432.13	348.571	620.377	157.478	136.807	90.5385	120.389	282.076	151.571	246.581	242.273	265.408	114.412	401.986	306.816	134.754	113.147	223	333.359	93.0526
	126.433	253	165.2	359.029	137.394	412.897	115.987	373.227	643.904	475.067	483.833	186.875	162.132	94.0946	117.86	292.284	252.58	229.701	294.435	272.935	102.886	329.269	364.846	183.433	107.618	192.843	302.09	108.637
	109.818	342.42	76.7692	348.421	144.431	93.3896	95.8548	443.164	586.515	431.361	572.684	174	153.145	92.4684	118.884	204.14	244.507	252.429	244.739	291.493	86.9077	341.304	286.635	119.934	103.658	265.645	265.967	88.4286
	108.627	297.636	181.072	373.154	155.897	563.688	122.239	470.463	762.909	506.049	832.027	159.927	148.754	113.522	85.625	235.92	304.275	225.958	222.45	246.649	75.7313	458.25	209.688	151.487	103.682	205.221	355.652	97.1806
	144.759	308.205	174.541	324.346	151.97	122.194	132.985	439.05	789.838	399.975	503.195	171.722	145.325	108.975	141.043	201.085	315.918	239.697	216.589	338.685	8.36667	312.522	338.3	120.986	108.051	251.683	252.122	103.389
	95.8551	232.895	97.527	325.421	99.7237	554.437	143.154	451.623	725.452	391.73	734.908	183.102	167.789	110.771	110.264	170.548	327.545	146.71	202.551	274.831	117.6	324.697	368.237	137.268	108.964	130.364	249.527	95.7083
	121.779	306.729	96.2639	387.707	129.088	617.551	122.433	508.356	654.737	589.82	360.377	193.827	149.254	109.811	98.8451	234.311	254.75	238.649	259.431	270.921	27.2143	311.429	376.4	156.093	98.0417	196.266	249.425	98.6
	115.436	301.483	85.3448	494.321	136.259	447.656	99.15	418.972	1015.09	161.367	741.891	206.069	167.809	88.2388	100.831	222.712	228.268	279.5	271.456	274.111	133.304	264.724	325.875	180.311	100.886	98.6757	270.75	98.9189
	136.481	291.065	90.7213	478.623	143.493	522.351	109.4	488.397	688.353	343	649.545	150.657	159.227	103.716	109.695	231.227	261.486	281.744	277.224	275.329	121.769	425.378	318.573	167	107.358	216.239	311.909	98.0159
	121.338	291.506	115.579	516.108	118.621	115.841	122.09	342.897	276.551	282.683	578.069	180.236	158.63	97.4615	92.5147	280.55	277.244	276.221	273.256	309.169	189.714	245.271	253.167	168.466	125.239	317.924	261.877	94.0694
	81.697	272.885	124.757	475.591	102.842	129.072	121.879	412.895	940.682	182.959	479.561	174.983	175.19	108.6	110.016	282.104	246.803	230.548	219.113	321.468	66.2051	392	266.507	98.4688	100.963	239.165	259.974	102.297
	132.918	318.625	112.861	490.405	120.25	541.053	121.603	494.033	861.506	445.5	636.739	142.237	170.161	80.3607	94.5432	309.015	208.217	203.218	222	217.468	178.032	342.23	270.254	173.65	106.568	266.171	221.632	90.1667
	118.208	292.447	119.416	526.025	140.696	612.158	104.7	485.861	789.179	388.956	332.485	168.356	157.337	94.1538	104.867	297.63	206.083	275.348	190.661	276.302	183.154	184.095	193.6	241.232	103.412	152.703	270.25	82.7917
	123.342	258.329	105.024	489.585	147.544	549.017	83.7183	416.603	508.421	525.928	716.218	180.25	170.367	112.644	111.895	277.756	257.654	226.55	228.885	246.452	185.657	369.535	399.973	197.732	97.2059	89.6522	254.394	114.529
	108.91	264.785	116.582	421.148	116.849	441.928	105.667	467.644	866.18	463.609	597.429	157.375	155.945	115.367	107.051	308.784	265.03	245.224	326.676	238.803	398.841	512.961	386.031	123.573	79.0694	239.589	222.864	98.0769
	112.564	256.217	121.067	598.662	136.455	154.192	98.3333	429.45	808.056	441.544	538.517	177.276	158.851	125.828	116.688	349.311	272.358	246.868	206.36	236.451	204.526	457.667	304.611	128.145	94.4103	177.275	319.672	93.2857
	120.41	305.299	123.782	456.013	126.545	513.239	98.6552	446.438	601.633	352.842	655.516	141.627	157.392	117.938	116.029	303.411	251.592	239.521	246.474	249.857	104.087	337.195	222.973	179.138	118.532	142.176	248.109	106.506
	102.446	247.397	117.881	482.378	104.833	428.5	110.716	395.625	654.938	348.478	445.262	183.169	156.386	93	95.2405	268.726	266.218	236.737	216.848	227.118	96.5818	365.69	343.062	175.62	107.2	234.446	216	99.9028
	117.074	287.509	93.0847	414.359	158.458	526.123	95.3881	532.897	886.418	452.897	645.143	154.75	175.754	107.21	121.5	259.662	248.567	247.946	228.413	325.613	104	339.508	301.474	148.422	111.145	174.579	219.902	90.875
	145.986	253.931	113.75	514.671	123.487	469.362	99.9577	556.224	474.103	421.425	609.925	186.426	260.758	102.456	113.877	298.745	252.029	187.462	267.724	184	144.909	414.329	280.961	144.194	104.667	182.69	199.919	99.4576
	112.123	285.329	127.869	472.613	147.776	263.779	118.028	357.606	724.59	465.066	660.956	154.833	160.318	87	101.541	195.91	212.5	277.369	272.132	270	188.065	288.111	282.87	105.449	107.646	293.721	268.566	104.6
	105.306	275.258	116.082	423.594	130.849	409.603	126.935	537.899	629.282	358.775	286.672	127.506	183.315	93.0137	114.87	202.816	197.766	213.873	261.07	367.583	164	441.684	253.5	126.356	120.355	228.31	266.648	110.973
	135.139	270.102	126.75	389.65	134.7	93.1324	118.528	485.09	877.714	477.582	208.086	178.704	162.343	97.6613	113.075	297.156	237.031	285.033	195.255	302.671	90.1842	343.632	247.304	115.094	111.306	240.167	274.71	96.5949
	134.429	293.932	117.182	422.938	109.917	544.156	105.88	596.175	777.641	350.648	265	145.25	194.424	97.9091	112.895	272.841	249.587	227.462	294.679	231	85.7143	344.211	344.205	107.254	99.0508	175.575	272.188	108.077
	104.403	293.409	105.855	632.136	131.687	427.594	103.257	340.484	393.638	460.571	45.9444	180.375	163.279	99.7455	101.961	277.545	257.464	172.738	264.289	220.372	214.63	222.215	253.864	126.406	103.018	147.104	250.076	99.4444
	104.785	284.213	86.6479	327.491	120.074	455.893	97.1803	268.449	785.016	282.508	268.776	163.587	157.672	102.368	108.081	265.217	238.452	190.727	233.662	291.867	185.889	266.15	311.85	207.474	119.793	179.426	269.082	111.895
	120.069	296.537	118.091	414.514	151.431	581.392	118.329	247.346	842.067	255.614	305.603	169.646	157.092	105.678	125.014	334.621	233	198.587	259.414	342.171	196.273	369.806	306.15	175.971	89.1972	230.15	336.773	102.598
	117.057	284.371	94.0896	509.783	133.984	589.123	106.359	280.433	794.424	342.615	252.239	166.757	149.672	98.3291	97.4237	137.09	184.584	213.217	251.652	304.609	179.737	410.343	398.468	170.127	123.973	149.649	224.103	106.089
	141.557	299.763	126.41	519.319	123.887	98.7377	104.764	277.382	599.092	212.328	247.658	173.925	192.742	118.558	91.5	249.782	224.603	217.051	269.527	211.914	176.086	358.947	319.263	164.811	104.271	144.627	221.667	78.55
	137.797	265.043	109.377	551	120.836	584.164	84.2857	400.069	843.099	257.739	200.892	194.985	144.892	90	119.883	272.221	272.746	210.507	251.795	265.478	217.509	356.875	267.389	414.559	112.3	200.57	210.453	93.3929
	137.092	255.877	105.235	407.157	134.421	592.61	134.817	335.141	859.855	299.314	337.355	172.584	170.909	101.84	115.107	291.173	223.985	178.557	191.45	227.551	350.843	454.3	414.462	183.929	120.025	260.507	259.914	87.1311
	116.278	291.286	124.286	483.571	131.236	418.585	94.8413	312.915	911.261	287.932	244.644	146.167	159.948	120.853	106.965	248.811	233.608	143.543	207.246	285.059	144.179	233.534	334.077	221.227	101.156	179.447	238.468	82.1644
	113.25	300.455	106.038	368.938	148.434	28.9804	92.0256	348.563	811.838	46.2821	433	179.797	194.237	99.8116	114.746	229.62	242.303	212.947	217.324	356.819	145.439	344.933	224.803	132.696	109.908	258.986	244.125	90.4744
	110.861	298.851	91.7206	542.789	144.537	38.7255	102.051	344.164	959.787	291.803	373.152	196.293	246.703	90.4928	115.062	308.394	246.703	223.262	215.086	328.959	470.429	451.448	336.875	157.262	102	98.2353	275.525	93.4912
	153.088	312.138	105.606	382.569	136.605	66.5273	124.785	319.578	800.862	114.727	335.046	159.507	152.879	103.458	114.378	266.278	153.032	175.152	243.684	268.254	401.203	373.042	332.284	201.359	112.3	200.121	240.55	109.44
	118.723	272.556	99.1487	412.794	112.351	47.9492	89.8194	371.377	797.817	296.338	321.745	143.312	143.658	124.431	110.724	332.306	150.321	239.757	147.778	214.707	324.586	274.671	324.692	151.789	96.9231	190.658	290.435	90.6522
	138.449	289.23	109.359	467.415	87.3291	69.8966	106.541	270.377	921.085	438.446	376.618	173.131	164.259	96.6129	105.966	299.886	229.567	214.962	263.467	175.737	189.636	477.164	295.841	133.018	110.5	152.795	298.716	102.262
	129.571	263.382	108.438	371.731	124.31	45.8308	104.729	272.786	815.616	394.866	384.527	178.839	166.014	97.1951	107.766	291.862	218.25	217.887	254.582	298.205	176.203	395.68	354.286	162.427	86.8197	250.59	295.2	95.5211
	137.638	291.247	97.2769	494.085	131.074	121.469	122.373	314.101	776.177	361.917	513.423	162.719	147.305	101.699	113.971	281.383	218.513	220.679	230.488	283.753	204.9	311.797	281.182	148.649	97.5696	225.708	244.453	85.0448
	124.803	274.824	120.808	395.286	105.931	38.8919	100.987	391.487	772.633	271.61	461.633	164.889	163.13	93.6936	103.238	294.507	211.787	198.013	260.536	236.474	189.821	434.889	350.571	132.446	94.0125	311.911	177.597	86.924
	116.836	272.069	110.109	500.253	130.072	57.2813	118.606	275.436	698.077	362.786	269.882	225.667	171.171	113.961	109.754	321.184	269.028	224.015	251.451	286.413	165.532	414.985	342.763	98.2055	125.351	187.456	273.89	98.5278
	131.068	244.25	113.714	358.782	163.051	64.0357	114.577	387.938	821.614	388.949	322.574	171.594	157.077	95.6375	116.154	263.914	201.413	206.597	264.525	304.619	137.229	321.803	207.118	467.59	100.797	199.213	269.25	96.1636
	109.547	288.902	106.461	450.356	137.683	70.2632	113.672	384.239	802.25	480.102	336.618	139.742	154.015	109.544	103.271	272.935	224.265	189.063	253.754	264.87	217.041	526.897	432.312	230.237	130.987	116.879	264.842	119.935
	117.474	284.938	97.1039	451.809	126.64	58.4286	96.2879	262.404	728.41	314.694	139.696	191.038	144.065	66.6567	113.316	249.62	219.243	294.758	227.118	314.75	192.536	334.228	196.105	248.762	106.182	186.662	257.716	99.875
	128.311	255.4	105.895	376.39	147.1	58.2881	95.9615	294.081	814.538	379.035	318.45	162.132	174.233	119.617	110.058	261.368	231.368	221.732	216.478	237.53	180.043	246.033	347.047	243.819	100.562	146.014	237.193	103.319
	136.274	265.6	95.6667	475.241	148.718	46.6667	102.661	243.157	773.102	352.163	369.27	184.691	187.268	93.9855	111.81	250.639	251.986	322.71	265.338	221.5	202.897	332.864	130.317	151.655	119.623	191.973	234.4	110.192
	134.558	276.393	131.131	499.328	163.667	109.657	114.1	312.338	748.643	141.986	468.87	183.159	155.158	104.763	102.194	292.149	258.195	246.697	287.098	332.528	207.8	350.506	353.343	107.844	101.167	139.5	278.6	97.017
	150.941	267.377	111.347	394.355	126.169	126.529	101.736	271.862	885.328	325.649	417.372	52.3538	139.952	101.671	115.864	246.714	237.017	255.143	173.487	219.095	187.625	224.611	367.73	152.439	120.57	154.761	273.917	99.8816
	146.862	261.737	112.139	438.339	111.608	73.7794	122.519	329.269	720.277	310.893	315.228	242.638	142.959	91.4028	91.7067	232.62	199.36	242.618	249.646	383.415	181.786	294.826	198.14	136.269	109.264	148.316	223.119	112.658
	153.354	285.156	101.675	292.45	94.1039	55.1875	128.286	287.659	785.986	234.778	271.219	161.192	153.919	103	117.357	250.309	206.729	236.959	261.607	341.458	196.705	445.227	394.136	83	102.671	140.708	239.424	102.871
	114.897	290.077	108.085	494.688	132.764	110.796	115.09	255.917	630.725	451.847	241.785	174.678	166.13	115.729	112.179	300.319	187.526	194.318	320.362	199.257	194.443	221.729	345.947	121.539	108.526	204.859	264.054	104.803
	123.072	267.862	138.583	377.148	95.9322	95.5781	116.276	267.551	647.049	285.23	302.509	166.655	171.778	117.327	114.367	300.413	220.1	269.104	222.345	257.882	266.508	482.242	339.808	198.935	113.772	200.316	302.016	96.1266
	142.753	275.8	105.583	406.875	139.887	122.033	120.025	376.724	697.639	256.716	256.853	148.823	150.763	100.174	110.39	225.462	234.629	190.05	244.539	290.831	199	328.966	225.82	291.221	107.207	208.906	277.756	88.1194
	141.397	299.395	106.946	484.35	109.083	78.1304	120.659	316.942	635.158	84.3676	290.805	95.0563	159.4	115.183	144.836	273.352	303.101	195.393	229.136	429.638	139.468	403	377.225	137.863	111.614	138.051	234.538	128.217
	167.413	239.5	117.206	397	115.794	103.297	112.492	211.333	716.6	223.266	325.258	156.459	149.738	86.8545	135.486	277.671	197.438	217.684	222.017	344.518	191.8	447.603	291.57	207.7	101.508	234.041	278.486	118.172
	131.652	317.908	95.8	337.533	126.603	117.512	120.938	235.527	612.139	320.875	255.897	147.203	174.083	78.7458	143.145	300.086	250.113	221.803	191.812	202.092	170.311	444.138	259.625	186.819	102.239	198.776	240.803	98.1818
	157	255.787	89.5538	451.859	118.103	85.2424	135.214	371.9	593.347	294.071	402.872	175.368	166.605	109.862	133.475	327.769	302.471	204.492	302.366	301.75	190.483	365.193	282.722	259.103	99.569	165.136	238.902	117.879
	155.89	285.541	114.379	404.875	137.61	85.5658	89.7073	292.729	451.696	322.359	308.534	148.364	155.133	89.0267	122.583	213.362	215.107	193.238	229.188	275.383	222.766	398.708	237.197	161.152	96.0536	115.507	245.253	124.241
	139.479	263.772	132.783	390.581	155.118	129.944	113.455	269.839	707.218	337.492	485.357	149.976	160.851	93.3939	119.959	245.835	171.923	221.987	303.095	196.684	171.803	223.408	261.325	260.69	108.607	170.207	246.547	103.984
	139.986	302.25	124.52	383.509	103.583	105.208	110.795	265.089	658.102	274.589	377.571	169.053	170	96.0526	117.475	285.533	197.224	190.324	210.323	288.338	189.577	390.491	505.103	204.618	116.442	99.0588	232.862	99.1125
	185.299	288.88	107.934	377.483	156.688	79.3684	99.4744	308.532	648.138	335.623	218.47	155.241	145.564	84.9296	129.429	241.933	195.973	306.2	203.595	325	184.973	346.211	332.987	223.39	92.7966	181.59	279.563	94.0455
	162.39	253.593	112.234	347.042	125.71	45.9467	98.4384	321.432	682.116	200.56	311.15	183.897	163.691	101.75	129.017	258.306	245.016	255.409	209.333	251.609	200.628	320.574	473.584	201.342	129.425	118.391	254.75	87.9474
	152.648	272.225	122.027	369.104	117.108	52.4	108.095	285.914	755.435	206.627	310.768	174.746	241.25	110.155	121.646	233.597	195.74	231.165	161.176	266.414	227.941	437.87	260.247	229.632	90.2609	138.627	220.435	88.2
	144.029	247.987	116.729	367.547	129.175	77.7794	101.65	311.356	586.885	286.553	266.731	87.1282	138.13	106.653	120.153	318.516	190.975	169.045	248.313	255.984	194.015	420.932	325.85	269.382	121.547	232.051	295.5	98.6026
	132.986	217.456	84.4328	345.317	117.697	90.0189	110.463	325.75	419.158	319.25	277.91	260.435	146.955	110.577	115.466	279.385	192.541	239.532	295.325	245.864	195.529	397.606	364.763	146.076	112.924	211.359	334.544	93.7833
	169.818	270.757	130.618	361.233	130.457	84.6829	113.328	289.014	771.824	377.233	234.887	220.361	145.391	87.0164	113.987	279.521	229.017	185.676	170.671	201.706	185.455	446.933	271.548	266.819	115.075	176.672	277.058	102.397
	150.657	297.014	123.719	382.592	111.701	80.0274	88.9552	319.543	803.09	448.088	312.333	144.692	170.855	101.889	102.846	259.875	224.145	214.947	353.072	314.692	194.474	215.667	298.925	158.605	103.086	181.809	298.183	83.5862
	145.275	248.527	102.301	426.816	121.091	70.4189	101.785	332	749.044	363.291	324.526	153.221	160.953	92.7313	115.688	283.096	195.03	185.536	293.781	290.266	208.354	362.97	327.974	225.045	123	171.649	217.726	104.71
	140.95	267.679	105.467	374.072	127.442	43.6486	107.5	225.863	638.537	401.068	333.756	177.648	174.862	86.4833	120.969	279.836	316.102	188.76	283.393	498.545	176.597	382.9	304.655	245.439	103.171	143	221.429	90.0877
	199.421	265.776	105.589	359.915	93.1739	92.6167	123	251.342	911.173	319.823	340.157	149.208	151.06	104.52	119.25	285.034	250.474	255.429	232.639	408.5	210.607	392.903	338.368	219.453	89.5714	138.433	235.663	116.266
	119	271.015	109.078	323.677	125.938	75.039	108.692	375.951	830.253	361.295	285.554	161.482	165.582	114.231	119.788	235.377	151.974	227.014	246.85	271.422	199.885	575.61	300.985	180.719	96.6104	164.658	275.377	104.338
	138.384	296.77	105.861	345.718	115.967	123.026	101	350.886	539.893	217.491	92.775	171.507	166.543	115.162	126.266	213.693	374.195	229.734	224.731	220.819	200.286	380.051	241.282	172.114	111.639	203.508	228.482	111.545
	179.192	254.217	117.143	415.329	119.556	96.1176	111.267	361.815	817.95	311.696	332.671	185.111	155.697	93.5455	129.924	268.373	142.297	202.783	260.342	199.076	163.542	416.033	342.101	138.345	109.966	171.408	228.424	78.6441
	226.083	283.359	118.152	392.793	131.354	78.2754	116.179	278.936	518.859	381.909	465.215	156.519	135.373	118.81	113.661	259.614	343.842	393.883	243.092	194.636	188.25	298.603	312.036	214.346	105.443	180.9	282.583	104.925
	123.05	254.434	104.653	335.885	124.083	91.5893	132.765	289.213	1135.75	74.9577	294.224	172.914	146.161	94.4675	110.948	236.471	130.214	367.493	188.037	246.734	200.758	296.853	294.887	192.967	100.373	148.161	270.899	98.9577
	181.295	275.549	109.468	420.222	127.875	124.582	88.5	300.891	965.14	276.136	609.797	175.118	172.913	79.169	112.188	258.697	427.117	341.26	223.369	211.824	152.452	426.836	178.39	159.844	120.162	118.156	285.014	110.712
	177.657	264.127	107.171	355.913	135.375	84.0667	102.86	416.714	790.79	244.508	488.905	175.088	129.357	99.2353	121.464	273.105	303.885	451.571	257.475	338.881	186.622	331.545	393.266	249.831	92.6753	152.44	287.819	100.188
	148.567	308.115	103.315	308.538	108.117	109.915	97.6667	324.322	734.671	189.631	303.721	190	164.515	81.5217	108.833	223.914	240.558	349.268	281.897	287.702	196.738	259.267	442.692	244.443	89.1014	163.654	294.333	115.982
	181.565	254.932	95.3214	326.507	123.051	110.41	138.941	306.571	839.59	181.227	524.947	144.034	144.846	109.694	110.423	249.4	262.911	181.923	249.733	366.88	183.174	438.103	261.658	188.194	102.117	123.25	242.7	81.1094
	134.633	265.789	123.722	344.378	122.267	97.2879	106.914	330.915	902.104	254.828	413.5	154.042	164.7	91.3699	104.694	257.068	399.478	253.348	233.667	236.857	181.838	443.474	323.737	255.377	103.722	141.893	268.127	106.013
	156.637	263.885	114.672	370.86	141.389	85.058	118.044	265.231	809.276	199.014	297.275	167.949	136.6	123.587	111.966	251.908	328.944	267.072	193.803	258	197.948	559.21	351.357	185.45	124.985	158.855	293.154	78.6866
	136.529	269.342	105.167	332.855	152.4	101.563	110.822	245.902	805.221	169.541	297.676	165.862	162.833	95.5921	138.667	275.474	259.451	261.026	211.709	245.974	193.833	416.113	326.38	210.448	100.105	140.366	281.025	98.4247
	163.522	305.868	106.558	374.649	111.517	115.506	128.083	330.836	763.442	260.231	322.246	156.8	164.855	98.8806	122.128	263.025	230.696	327.095	230.861	236	181.092	450.235	242.775	222.317	102.438	179.333	240.486	111.155
	134.406	275.259	117.782	306.515	111.25	114.158	115.629	293.65	749.521	208.274	250.794	186.8	167.986	106.098	134.966	248.296	243.397	276.535	265.108	332.806	282.878	237.328	388.015	321.141	86.4937	184.677	259.443	99.7895
	146.271	279.071	98.507	348.697	141.15	51.9028	107.25	386.678	784.527	196.776	273.118	160.096	157.333	87.2338	130.814	285.313	160.762	261.375	315.121	292.932	191.556	388.162	328.291	184.631	103.696	167.368	258.453	95.2188
	176.819	283.638	109.75	282.529	108.961	49.1867	102.107	257.662	929.147	342.628	345.102	167.215	165.316	105.769	126.029	229.747	268.403	320.346	259.938	195.026	213.769	333.623	423.618	197.671	97.1139	144.938	236.241	98.2179
	195.412	279.071	111.217	366.117	115.817	44.56	106.2	263.207	992.45	155.959	397.561	164.082	183.055	93.9231	125.825	302.419	226.403	316.853	308.987	238.968	155.544	314.247	259.338	181.111	124.111	154.41	239.15	105.304
	158.77	260.964	102.691	368.647	107.494	90.8816	107.637	299.394	785.662	248.91	420.311	114.458	174.205	93.0617	101.9	268.771	235.878	283.761	252.93	306.667	198.441	298.712	244.805	213.164	89.2353	109.779	352.368	88.1176
	150.169	269.13	113.732	339.484	127.385	93.6716	109.026	255.192	951.5	241	541.328	196.176	172.738	123.243	104.971	287.089	186.066	284.182	189.033	289.309	230.841	341.986	276.653	226.969	102.957	117.778	348.897	101.603
	134.22	282.899	131.24	389.45	123.224	95.6833	81.8158	277.548	913.481	166.25	258.717	156.841	125.774	88.8769	110.11	277.141	263.566	211.438	157.3	268.219	185.025	326.095	422.554	251.31	107.514	109.385	237.492	101.656
	205.311	272.159	100.014	409.161	125.74	62.6324	121.724	289.5	953.315	261.678	259.2	152.337	165.59	116.174	106.957	286.462	282.808	312.492	314.966	357.539	234.571	357.928	281.814	168.754	120.235	122.62	298.607	81.3684
	135.429	283	108.614	368.194	135.795	59.3333	108.573	273.547	483.296	130.772	451.045	159.038	155.928	85.2941	120.649	194.175	298.882	313.346	187.899	223.483	198.672	377.723	262.22	127.934	114.468	190.063	308.459	97.3771
	135.671	297.5	102.688	330.74	129.182	59.6267	87.3556	335.591	823.443	227.268	352.356	153.727	152.699	106.382	147.224	235.468	170.167	212.26	216.696	322.103	190.108	311.077	378.8	224.309	110.053	102.375	279.133	111.431
	145.711	278.948	112.307	373.4	140.351	79.3788	114.164	360.493	905.949	268.375	389.795	120.375	157.69	105.464	121.018	247.149	249.415	215.029	227.375	193.577	189.794	472.137	306.653	182.171	100.766	153.851	173.833	107.371
	150.734	267.092	99.5556	365.056	93.9875	83.0685	103.333	271.121	499.471	294.849	514.338	195.2	132.688	102.8	126.743	216.192	248.575	268.395	190.974	220.697	165.514	381.787	309.013	193.288	106.902	167.4	218.74	102.616
	154.141	253.145	105.754	326.077	153.246	86.8148	100.164	300.923	683.974	196.188	386.522	180.679	150.103	108.037	123.705	235.806	217.258	248.625	203.456	217.92	201.591	362.973	242.267	150.618	95.3803	140.875	291.835	108.025
	143.116	280.175	96.3026	303.013	92.2295	89.2857	87.1282	220.256	882.949	237.321	346.947	151.413	145.545	123.533	129.732	238.475	252.757	269.507	259.618	174.328	189.384	309.041	255.871	176	105.5	135.5	223.564	98.6087
	161.317	292.274	100.26	331.038	107.875	113.831	139.432	272.389	1000.46	200.121	217.09	154.961	157.196	117.403	114.165	313.356	286	179.983	299.657	196.26	199.276	500.224	323.224	182.976	111.45	184.219	268.881	103.614
	130.974	262.791	201.935	316.776	124.293	198.461	106.136	260.635	842.763	113.75	250.722	184.588	153.404	114.143	122.353	260.667	238.103	246.136	270.896	260.644	208.241	387.885	262.082	225.175	111.95	106.474	255.593	97.4865
	134.404	286.774	209.273	379.095	134.493	43.1364	127.264	239.685	797.57	273.873	250.066	137.792	149.113	96.5676	122.403	357.441	245.822	253.351	222.427	240.462	193.61	457.795	257.97	270.895	103.014	120.658	313.846	117.355
	124.092	292.171	104.89	319.188	146.541	59.4063	98.4186	247.589	862.279	248.15	195.768	171.607	152.769	125.684	130.279	235.26	240.292	255.067	305.829	245.987	198.355	399.582	398.038	196.453	95.0132	192.137	238.518	93.4189
	190.875	252.487	170.571	348.481	125.425	81.6812	114.586	332.247	873.038	317.117	154.591	121.938	142.148	113.261	124.508	254.355	256.75	256.796	156.133	217.1	173.159	475.367	334.2	147.557	106.603	135.279	367.188	90.1967
	128.836	295.361	128.969	301.254	120.903	70.4	100.069	232.423	832.684	252.512	346.273	168.016	180.627	107.574	116.667	261.278	272.928	247.519	308.518	188.167	155.404	331.687	222.262	185.5	101.145	149.987	244.069	103.417
	219.5	233.568	125	333.291	116.897	60.0563	106.421	281.521	821.397	224.7	409.805	153.481	163.026	116.85	124.232	254.064	273.173	199.254	223.325	215.259	191.088	355.377	289.778	185.461	98.0658	182.227	270.329	123.657
	128.897	239.754	147.413	305.298	95.6379	98.4688	101.897	304.784	407.039	270.7	297.113	167.542	168.836	117.108	130.836	235.292	151.918	209.861	215.846	286.143	209.208	341.246	276.763	170.895	92.6027	148.838	230.105	115.872
	161.028	273.8	133.97	403	120.814	59.9206	114.548	259.934	851	323.045	469.541	169.913	145.767	93.7564	112	284.258	235.433	238.544	257.415	231.947	189.638	373.155	289.209	169.231	97.6066	291.791	281.387	116.429
	250.312	214.375	96.3051	369.351	100.882	46.5606	120.987	213.97	625.344	280.525	506.825	158.227	177.714	96.8861	126.362	216.253	218.4	228.214	261.347	269.901	211.946	306.473	267.386	234.194	99.8714	250.444	277.347	112.316
	127.474	265.814	134.986	312.434	112.924	35.9254	121.208	278.103	812.641	220.435	528.897	80.1081	148.4	96.1507	117.031	226.459	239.262	220.19	245.506	257.263	155.681	400.873	359.576	171.969	96.0161	263.671	280.759	97.5846
	141.395	268.888	109.526	309.724	108.808	85.3699	127.072	341.909	661.883	251.493	567.333	152.918	155.919	103.193	116.227	279.514	223.096	239.824	292.017	298.484	170.419	380.754	266.908	158.493	86.7681	233.108	228.722	105.816
	193.613	332.848	109.788	452.765	119.855	81.6066	98.9351	262.478	732.711	289.493	434.433	181.494	134.968	102.773	116.472	228.561	253.282	261.127	268.444	231.592	189.338	470.921	276.45	188.685	131.267	381.493	268.03	84.3607
	195.492	255.851	106.256	313.694	129.839	43.6901	104.514	272.719	903.172	285.295	188.911	172.031	154.446	110.413	108.288	231.697	212.343	303.889	285.537	165.645	208.478	414.853	314.039	176.364	108.221	116	280.551	101.533
	126.1	242.441	134.033	322.763	126.25	185.71	108.682	255.169	178.283	232.09	572.547	159.154	150	101.459	122.27	219.603	233.241	300.903	236.435	238.162	195.395	270.407	249.27	139.662	107.689	163.188	251.266	103.705
	187.069	274.775	131.714	298.772	129.538	40.2353	99.8987	234.242	786.983	257.85	243.958	135.776	151.667	98.1	114.688	235.75	260.25	129.333	273.547	254.616	187.5	339.513	272.618	179.261	107.567	268.492	286.81	84.6034
	135.408	310.25	112.571	367.775	133.527	69.0933	109.686	234.438	195.603	285.462	299.705	153.614	192.722	105.565	113.575	231.137	251.763	236.842	140.141	217.295	309.19	249.038	271.178	157.474	96.0571	150.244	279.538	127.683
	176.353	289.848	116.808	297.426	112.125	63.0517	102.507	237.236	650.75	247.5	393.392	146.307	175.491	104.083	121.942	245.034	271.553	224.453	314.8	314.959	172.276	564.773	351.179	149.289	93.275	249.486	273.459	89.5179
	198.205	254.672	123.211	316.535	112.924	109.127	128.167	333.722	640.857	344.513	310.417	149.904	166.077	108.908	113.461	283.75	166.825	254.149	248.268	265.65	218.048	454.649	315.13	111.821	100.824	168.518	246.575	107.459
	190.84	275.211	140.568	302.324	142.769	67.8182	116.188	266.875	404.781	345.387	427.244	157.152	164.507	105.787	133.32	269.961	231.357	245.464	266.056	225.707	203.868	350.923	216.274	172.139	99.7368	239.246	241.864	92.3513
	143.419	282.094	101.254	369.517	116.078	64.1786	83.4531	234.273	503.047	331.508	409.782	236.844	185.469	90.4306	108.451	242.683	220.896	270.308	251.5	243.786	187.699	470.809	318.444	204.493	97.2	221.901	268.644	125.667
	178.691	282.13	109.646	266.182	126.895	52.2879	89.475	257.97	762.532	359.152	539.966	177.268	150.236	109.967	130.113	272.649	213.974	221.311	311.42	221.385	180.872	412.889	183.253	132.633	90.1039	250.483	286.478	107.677
	171.645	258.031	123.661	329.03	116.039	81.9683	108.155	325.41	666.662	299.149	607.092	170.133	145.329	113.351	127.339	302.938	229.088	240.833	259.859	164.087	166.712	487.149	261.069	129.447	98.3544	224	263.141	102.588
	143.871	286.205	127.544	356.414	119.896	64.5156	101.441	267.211	414.179	364.192	509.899	141.145	170.467	100.609	113.447	227.826	255.6	253.567	203.352	163.628	198.941	413.169	322.789	168.328	88.2639	139.171	278.542	94.5132
	161.054	262.884	113.09	292.675	89.5075	61.4194	95.6977	284.558	258.047	213.293	589.956	138.605	161.721	107.967	116.716	233.254	181.154	178.211	226.385	223.62	185.779	381.898	157.213	127.961	97.9464	107.623	240.486	102.069
	123.719	320.9	129.03	395.792	109	109.923	97.9231	254.415	801.267	189.714	561.537	167.692	156.618	112.323	111.783	250.475	209.197	286.95	318.25	165.551	187.803	387.557	289.855	154.953	114.592	167	227.683	98.7571
	136.25	275.829	124.472	353.234	115.667	110.881	105.372	239.922	769.203	300.726	720.013	240.905	148.853	99.0946	124.175	219.409	276.59	316.969	233.587	264.279	169.566	242.797	310.863	190.895	94.9231	139.333	313.233	90.7838
	159.756	292.559	119.095	292.714	127.107	57.962	121.925	303.766	566.815	311.584	306.257	154.026	140.61	119.217	129.667	292.615	231.534	220.016	243.631	237.547	153.383	370.882	272.229	225.088	135.563	144.968	299.776	106.808
	111.127	319.711	127.058	306.908	118.103	43.8281	102.932	268.6	422.786	162.966	339.658	165.946	143.268	89.5588	118.375	177.228	202.406	258.754	235.09	191.869	205.859	360.795	370.453	210.877	150.831	207.488	265.767	107.566
	262.8	274.633	116.986	338.822	122.577	124.985	95.5217	238.558	388	302.254	227.55	53.5357	123.661	86.5439	111.623	217.754	224.456	211.542	229.234	322.933	179.5	495.145	365.525	207.058	102.179	160.833	268.922	83.7714
	243.632	259.946	146.015	376.114	106.81	67.6102	28.3881	325.962	748.342	263.773	347.389	141.343	159.082	111.803	119.508	247.528	217.919	240.697	222.894	218.329	220.022	458.822	383.273	208.295	111.519	200.955	257.911	93.5541
	162.431	280.343	125.519	289.597	136.507	100.014	306.811	316.791	614.734	286.792	336.418	158.23	187.561	131.538	118.077	227.451	250.716	221.179	261.629	245.035	202.625	445.218	201.483	228.128	113.898	136.656	268.644	102.519
	108.982	255.564	104.108	290.243	136.463	96.6143	125.483	320.934	712.061	184.24	544.662	151.622	166.529	95.371	109.583	227.727	189.812	206.518	258.338	204.276	195.863	341.848	316.165	189.338	76.2462	193.884	254.276	96.7385
	206.583	253.203	103.215	302.913	134.893	86.4407	157.683	357.6	643.164	293.244	274.425	158.273	180.096	123.675	105.233	212.119	229.016	223.517	266.636	222.027	197.697	407.179	238.7	152.781	121.558	218.836	243.769	105.564
	168.5	246.278	134.523	363.974	149.054	42.3684	162.293	302.75	532.692	250.234	426.275	151.671	161.559	140.172	139.734	232.773	196.078	143.73	292.441	212.754	180.895	500.74	301.148	196.469	125.317	152.444	261.548	98.48
	148.254	283.474	125.412	332.468	135.017	91.5593	159.78	357.582	684.433	284.039	658.235	161.65	164.859	110.58	124.086	221.308	207.253	218.013	257.955	263.522	229.621	377.153	270.322	254.895	114.338	215.826	267.028	110.231
	145.528	243.983	120.24	335.261	152.549	111	622.629	342.55	585.382	234.306	355.706	144.846	152.559	100.018	96.5479	218.169	209.125	139.289	339.679	234.397	187.597	359.563	289.887	113.097	111.015	176.623	303.776	110.303
	156.329	276.892	110.714	326.137	144.082	113.541	198.661	290.725	651.75	191.481	521.421	130.056	146.384	85.7808	118.857	256.258	195.615	218.842	224.488	146.421	74.4821	332.177	337.563	143.63	133.293	206.382	336.369	103.679
	144.412	248.759	117.967	249.972	183.895	123.267	615.771	263.708	729.853	320.782	395.62	155.1	152.194	102.154	119.221	218.461	254.841	223.932	279.208	231.412	162.975	452.619	265.792	154.37	96.7162	190.917	253.429	102.338
	231.232	229.25	125.143	331.7	171.949	117.052	707.641	374.121	658.122	260.8	564.772	152.407	142.045	98.8101	113.75	275.048	246.184	225.987	245.936	243.282	192.779	339.537	385.232	241.159	92.4394	241.957	267.803	97.3289
	134.645	288.586	107.148	363.397	161.304	108.026	636.027	367.175	551.145	270.948	447.463	152.184	164.372	98.481	119.539	270.339	198.236	243.814	208.925	244.219	197.429	352.901	296.377	216.419	99	127.172	244.7	106.492
	134.52	246.786	96.9844	301.275	155.845	128.625	253.386	271.88	608.986	285.176	622.914	137.737	171.276	109.538	106.184	255.064	238.203	257.725	241.456	271.687	271.934	383.893	208.475	181.556	108.806	247.647	347.785	94.9254
	123.397	253.821	103.848	274.544	159.789	65.8088	190.288	237.367	659.41	345.658	460.541	137.424	161.429	101.579	119.053	245.828	242.689	226.776	250.04	241.375	181.6	280.2	270.71	178.462	92.9211	144.491	293.929	108.102
	128.333	264.35	117.864	353.554	154.113	55.0154	426.076	320.069	706.944	243.014	553.359	144.891	160.027	90.8358	118.479	223.851	248.986	222.493	248.597	243.921	196.446	529.966	325.842	215.899	98.6462	151.337	286.036	82.7531
	153.015	268.069	129.447	321	146.833	136.729	608.026	205.365	685.921	292.565	419.757	177.518	163.683	125.821	113.756	208.257	180.068	176.086	291.327	227.092	158.18	449.532	232.311	177.113	113.299	187.218	272.353	91.3377
	271.227	267.064	135.391	282.521	145.762	56.5	569.862	245.97	302.63	268.316	516.571	156.306	179.397	89.7246	116.4	234.389	165.905	206.654	254.754	252.241	221.897	419.685	205.441	174.613	112.417	115.696	273.864	109.743
	122.986	253.603	114.623	298.324	152.35	48.7857	320.026	262.242	726.885	365	440.61	134.5	170.985	101.23	109.339	244.589	214.465	222.769	230.828	192.284	207.597	461.7	315.962	251.391	104.197	181.191	250.558	103.135
	136.629	299.707	150.438	272.211	156.557	49.1733	140.875	368.103	532.32	241.065	301	128.03	259.538	86.5479	105.446	195.878	141.526	232.486	187.871	200.819	198.675	400.557	317.662	131.734	109.787	180.526	241.649	97.3971
	193.81	314.904	126.597	333.816	127.354	117.644	399.276	313.486	839.051	204.639	309.092	160.242	159.227	122.025	118.265	246.557	219.802	182.466	233.768	214.357	217.408	474.425	387.443	189.095	109.333	162.321	245.536	84.0556
	163.6	267.316	115.77	259.118	119.062	118.25	137.471	283.494	278.316	316.645	338.088	120.784	174.865	118.643	117.737	262.897	195.368	226.845	298.459	257.221	160.107	399.181	434.737	195.375	113.544	149.319	325.929	87.8571
	128.609	277.693	112.013	365.943	123.339	141.851	112.298	260.316	763.027	319.773	337.897	139.921	144.203	93.6667	110.646	224.891	219.629	185.682	269.9	239.183	166.458	458.513	407.304	229.481	110.534	211.922	293.25	106.607
	200.191	240.612	126.747	276.474	146.542	127.327	119.4	551.435	843.247	292.27	383.841	153.069	136.132	103.471	101.507	195.014	198.483	175.845	311.754	197.104	212.657	353.833	303.551	166.052	109.486	94.0779	245.974	103.877
	169.676	294.861	91.6053	297.597	166.507	105.151	471.468	587.338	695.034	214.434	397.734	155.397	176.939	120.162	123.878	216.438	311.468	194.913	232.532	211.093	205.569	399.431	201.143	223.716	123.222	126.391	316.477	111.359
	139.512	255.937	119.136	287.623	136.167	75.4737	128.697	447.824	588.041	155.966	344.3	145.397	147.881	104.083	90.7385	197.514	491.38	207.569	163.862	225.423	216.984	288.557	375.697	251.076	101.672	103.426	249.219	102.06
	131.589	306.433	122.567	281.186	186.039	113.96	388.071	554.851	690.753	213.912	351.31	157.6	146.179	104.194	134.782	236.07	308.92	180.328	267.429	221.828	180.382	481.483	444.192	211.768	117.183	109.667	302.438	85.9855
	180.671	264.653	113.115	328.222	140.526	120.679	432.145	351.486	816.218	271.107	163.681	139.266	141.191	96.4655	116.394	204.364	269.282	230.517	133.6	264.462	210.899	523.607	376.931	219.78	93.3088	127.364	323.541	90.9667
	132.013	266.746	120.421	354.939	143.742	82.4219	132.703	441.949	729.483	332.88	240.578	136.662	122.957	122.42	120.179	206.25	298.972	216.633	273.149	246.262	173.304	239.722	329.324	390.443	112.321	196.611	375.789	105.911
	139.079	224.087	139.06	398.329	132.241	103.302	481.74	587.767	735.533	268.056	460.615	176.405	135.507	107.353	109.971	239.724	225.526	210.566	242.141	201.788	215.655	467.507	343.983	185.655	104.82	111.936	301.311	101.321
	169.746	251.357	114.486	291.295	125.044	72.1639	361.316	387.791	757.797	238.367	544.169	166.412	143.569	119.311	113.215	239.065	242.686	210.89	265.949	247.8	180.791	345.014	250.292	161.418	102.017	101.425	135.074	101.125
	172.965	231.171	110.785	274.263	114.838	92.3284	353.954	494.116	724.115	271.455	500.975	150.792	156.105	119.452	113.455	249.5	268.5	224.688	277.289	225.473	187.312	236.233	357.61	176.55	103.973	104.443	114.132	82.1493
	112.878	228.714	111.481	328.431	162.162	140.672	543.589	562.608	720.388	220.015	541.633	210.542	157.221	90.9403	117.795	220.231	236.304	162.203	263.714	221.317	213.844	366.544	361.544	202.587	131.563	120.64	296.961	88.6866
	137.623	272.551	134.914	241.753	129.5	121.149	669.455	527.928	294.938	369.926	340.259	147.408	162.258	107.063	121.05	200.608	199.338	238.97	230.314	196.657	225.3	477.639	426.509	194.389	122.449	105.431	322.829	110.018
	126.379	259.408	130.183	305.442	135.743	91.7821	598.829	622.178	551.432	305.475	527.5	162.397	157.329	96.3043	110.072	199.691	240.05	222.657	209.189	223.047	197.922	249.13	311.016	185.914	106.583	200.139	358.228	97.1918
	149.754	270.278	127.568	275.271	139.972	74.8052	358.692	609.517	606.188	269.629	628.138	175.473	208.847	100.754	114.961	225.746	208.5	234.2	228.625	235.776	214.75	218.538	324.034	147.383	105.576	100.444	245.208	83.3485
	159.244	229.057	111.221	305.278	116.07	64.8852	287.77	643.116	710.585	237.125	235.181	162.671	132.945	99.0286	124.558	208.344	222.131	229.355	257.242	176.238	194.947	378.189	267.553	225.727	108.559	299.435	240.492	94.3038
	155.947	260.145	129.292	325.737	152.448	80.4531	205.092	609.128	658.913	170.536	319.192	158.616	165.523	103.247	128.544	217.015	210	205.312	199.212	211.688	180.254	378.8	282.09	252.161	101.333	241.205	269.225	109.508
	305.014	228.701	109.545	275.9	160.468	95.5946	415.353	601.733	898.038	287.408	481.973	149.707	130.756	101.431	114.823	226.324	230.848	166.623	164.41	231.467	183.366	414.367	323.592	131.692	103.296	102.227	203.316	100.25
	134.108	240.643	89.5254	269.421	163.329	96.3973	506.563	615.569	707.143	238.667	567.317	117.657	151.25	122.278	131.449	203.254	211.764	241.662	231.22	203.048	183.846	505.947	375.197	205.738	106.55	114.684	227.246	97.3014
	145.462	200.942	106.165	415.395	159.747	122.607	228.823	341.536	704.436	338.359	425	142.314	152.536	101.491	124.592	205.491	205.017	185.357	207.851	205.966	222.792	423.357	363.625	229.957	106.81	94.9683	286.493	95.2623
	139.12	275.95	126.123	267.732	143.724	83.4324	494.057	543.696	485.083	331.276	437.049	178.169	160.577	114.167	130.5	209.821	211.385	213.077	299.507	253.152	170.283	581.286	321.486	110.155	118.277	94.0678	257.342	86.4677
	172.632	263.571	107.368	290.652	139.265	95.2375	585.267	505.7	970.276	318.625	499.016	170.696	132.594	115.273	126.719	205.923	197.368	226.652	236.738	199.667	190.582	480.27	390.016	180.431	104.028	107.045	253.949	91.5441
	139.569	217.414	111.065	279.329	156.464	103.434	322.803	605.528	903.529	304.569	541.438	164.592	143.328	122.93	107.824	226.886	204.115	187.544	209.156	194.459	163.438	505.655	328.483	197.725	112.471	101.945	227.658	104.946
	161.833	221.681	102.707	229.848	149.705	103.107	400.338	406.736	341.127	272.757	480.741	150.478	127.652	78.9077	113.893	184.746	235	244.925	238.609	221.343	265.075	461.742	323.781	209.971	100.119	284.157	214.725	84.16
	211.594	206.556	108.474	268.364	124.333	104.556	344.862	321.681	509.07	355.447	544.167	147.296	165.328	105.703	117.172	225.662	233.394	132.068	283	258.09	158.534	254.239	196.855	148.608	106.985	199.744	253.889	98.1053
	179.84	233.045	111.563	279.359	176.625	88.0588	381.466	525.908	678.5	304.882	284.042	155.857	151.412	111.606	120.25	198.8	223.729	159.078	242.039	222.74	174.932	409.962	231.468	211.643	100.534	248.611	278.494	93.4324
	139.513	238.6	108.4	279.46	139.39	71.7206	308.382	347.947	799.569	411.323	548.671	152.364	140.885	122.753	116.292	206.244	202.4	283.308	211.603	232.513	264.359	452.513	266.544	249.203	106.38	224.014	243.938	95.6774
	120.69	260.692	115.244	260.014	175.649	80.1948	381.139	577.675	360.857	282.564	573.056	165.906	82.1806	95.8154	121.092	233.385	194.714	346.763	212.089	268.233	225.257	473.256	364.604	225.242	97.8846	124.533	241.914	88.6944
	191.147	291.2	105.64	333.803	155.597	73.7667	299.39	657.561	981.185	217.699	372.2	148.271	135.033	109.018	113.254	244.351	217.833	244.672	196.103	211.192	213.537	481.051	366.03	249.205	90.0133	257.178	219.154	94.3333
	252.074	245.351	114.866	410.139	137.458	74.6825	457.513	482.039	632.506	180.387	649.528	152.125	155.759	87.7	109.721	206.688	202.354	231.246	194.731	195.595	181.148	498.922	328.175	305.704	111.661	153.446	221.234	97.3247
	145.594	244.221	119.013	326.544	128.507	59.806	204.853	438.878	276.657	346.106	635.419	158.931	129.724	103.433	103.732	211.68	216.913	316.172	181.284	228.149	230.238	402.485	445.394	303.125	94.597	226.987	202.548	104.879
	240.047	233.552	128.72	365.649	134.282	74.6034	446.446	463.429	982.691	286.764	792.638	156.079	169.969	114.481	130.311	189.203	161.22	385.659	121.713	214.195	179.917	298.763	381.896	193.608	87.3134	251.654	212.203	100.703
	170.6	275.927	118.594	339.583	148.238	82.5472	198.446	298.103	825.339	304.119	597.261	146.192	155.194	95.6232	112.389	185	184.563	194.58	218.917	227.987	182.466	256.403	363.898	148.828	106.254	253.8	236.729	107.288
	209.181	279.6	117.182	366.623	114.761	60.1481	404.039	298.886	731.636	324.986	647.063	151.169	145.793	93.0278	129.039	201.196	200.453	283.364	256.658	243.386	183.531	457.054	279.19	138.207	104.232	330.855	200.635	122
	264.936	241.882	94.6623	379.823	147.536	66.3919	253.712	307.439	332.621	424.371	235.27	153.937	160.196	103.418	119.018	192.41	249.831	352.615	281.567	165.31	190.662	400.776	267.817	182.226	94.0746	400.375	268.263	96.8108
	204.347	198.806	109.776	360.263	131.717	69.0441	379.11	299.237	248.035	381.616	492.395	152.586	168.279	85.9718	102.4	189	288.329	253.96	185.877	221.417	202.743	491.908	273.081	202.377	97.4648	361.6	287.192	92.55
	163.909	229.323	115.714	355.685	137.732	56.5395	389.987	335.069	678.154	282.169	487.961	191.946	162.487	99.7879	108.859	208.591	221.763	233.155	258.493	189.707	207.03	481.672	409.556	248.464	101.247	150.932	297.474	94.1791
	167.026	215.35	119.035	390.103	125.295	67.7586	342.848	237.461	822.357	274.747	369.684	189.282	139.956	111.513	104.817	213.6	181.855	187.082	213.515	181.582	179.244	389.372	373.269	225.594	100.947	107.095	322.348	106.684
	218.342	238.896	147.867	345.059	130.338	91.92	384.217	309.746	553.13	207.696	540.146	149.818	182.545	148.217	116.821	192.41	169.644	256.087	177.609	168.41	189.293	512.727	430.391	234.305	119.014	211.192	176.738	86.3478
	175.785	275.319	103.522	373.841	126.438	57.7241	446.75	372.689	727.172	242.184	519.013	144.164	153.13	123.329	135.241	243.353	280.191	216.215	211.477	150.7	184.757	525.329	314.367	153.391	97.5085	178.827	307.319	110.211
	297.017	241.253	124.339	361.692	125.37	112.567	357.117	302.052	575.616	328.297	343.419	160.658	161.946	123.691	124.973	210.532	206.564	285.079	132.18	249.06	206.836	511.952	337.877	188.754	88.7222	198.733	285.94	103.6
	311.016	207.314	102.518	374.558	156.052	45.6849	506.556	314.367	231.082	343.158	652.015	186.138	130.339	102.713	101.169	175.344	260.9	228.753	193.617	171.092	198.842	431.662	202.921	177.288	98.6667	337.121	231.585	111.551
	123.082	256.678	149.582	369.222	378.464	96.8611	608.246	339.621	841.909	250.818	648.603	168.987	145.842	102.412	116.143	222.233	226.941	245.859	223.452	225	227.754	405.623	397.577	171.88	122.658	246.985	258.068	112.949
	115.787	261.792	123.795	418.877	408.228	75.3867	308.971	267.75	525.273	277.364	468.155	166.861	154.898	117.321	127.647	171.817	285.25	212.745	226.667	217.203	185.125	448.883	357.97	117.429	93.6053	122.194	274.426	102.324
	147.628	262.241	142.859	293.203	139.262	78	283.643	369.904	791.609	275.537	633.787	137.564	157.561	96.1467	97.8421	179.8	199.983	226.405	225.176	231.712	239.844	467.211	249	162.875	100.247	115.203	262.03	99.0441
	114.053	216.776	103.552	374.141	120.169	67.1754	502.732	339.528	235.305	289.138	588.353	156.614	115.456	109.987	111.338	201.236	158.923	287.444	166.067	216.783	221.354	502.547	356.514	189.688	107.092	162	264.882	121.014
	139.714	233.47	107.877	364.387	682.271	110.271	345.703	255.167	964.418	485.769	716.987	152.853	178.054	93.3443	114.263	171.794	233.281	227	227.557	223.267	181.805	454.932	367.81	185.514	120.851	161.339	279.154	116.129
	96.5	254.26	118.899	334.486	288.564	80.8861	245.222	263.07	420.256	266.806	488.855	163.871	162.986	112.705	97.0492	192.613	271.018	214.702	242.595	203.656	193.52	384.91	384.563	124.632	105.2	306.137	223.461	99.2258
	120.532	210.461	135.413	378.667	567.6	69.6757	586.781	296.827	697.333	278.208	628.178	185.859	145.186	92.8333	109.486	228.113	274.788	147.474	235.517	230.554	191.831	432.73	361.855	171.827	120.044	153.608	272.138	108.644
	140.829	200.026	121.234	341.095	178.485	96.8064	380.612	281.962	849.268	527.193	398.273	149.828	159.864	85.7846	100	209.949	258.662	336.366	196.653	229.036	198.904	501.098	355.368	128.364	115.825	336.038	237.379	101.377
	83.4156	233.788	106.631	377.93	281.031	71.3462	332.414	314.961	512.861	390.26	651.093	166.672	160.523	135.455	111.324	283.768	228.154	259.324	183.534	217.592	169.554	441.442	340.015	141.246	98.75	285.42	247.457	98.2911
	118.405	257.987	128.493	384.455	162.9	42.5741	497.848	204.372	493.845	502.547	579.613	145.814	143.91	109.269	112.104	212.238	283.711	240.487	251.772	251.95	199.306	379.536	296.321	207.182	100	193.485	226.863	103.442
	129.39	218.879	108.176	348.948	208.103	124.582	337.877	355.785	739.392	341.092	177.922	170.235	38.7759	107.737	96.4304	249.841	154.742	230.276	225.378	215.648	222.42	531.485	343.224	179.058	118.132	187.485	262.362	95.5833
	140.718	253.879	26.3478	337.987	239.643	51.8841	756.268	357.031	598.047	268.722	432.586	174.875	150.175	100.268	126.857	258.429	231.73	201.346	200.102	245.194	256.133	246.722	349.734	214.033	104.468	306.821	225.906	83.3947
	102.554	201.846	182.884	334.768	550.203	68.6714	225.446	327.365	838.338	312.354	254.972	163.025	141.945	107.923	115.944	265.053	225.364	219.942	215.606	261.493	219.806	300.175	184.908	154.119	88.9351	139.914	268.949	114.375
	125.859	215.419	218.289	290.364	688.514	94.7463	255.329	312.985	585.776	435.212	262.182	166.889	127.982	118.039	123.934	254.182	147.594	200.682	263.464	154.269	201.6	629.242	304.644	146.233	91.3333	256.247	261.469	122.16
	122.733	194.5	86.1733	290.661	556.176	87.3276	182.211	263.712	501.949	347.123	414.6	131.371	150.153	94.4032	119.474	284.493	267.564	283.941	193.763	238.644	212.064	491.603	321.286	349.859	105.899	300.292	247.718	106.661
	145.329	319.718	224.321	356.351	746.228	96.3	219.769	302.74	845.077	147.603	279.5	124.688	167.22	120.706	115.758	250.744	259.932	263.176	191.877	288.214	202.471	298.107	271.684	163	104.629	305.014	248.566	100.267
	127.915	428.662	220.644	385.773	734.716	64.6711	172.029	228.466	577.232	374.192	323.87	156.813	148.306	94.5696	113.351	267.603	279.317	199.867	222.36	253.132	186.016	432.169	280.203	163.37	103.289	267.5	228.127	99.275
	151.333	316.625	106.438	334.279	516.706	51.7069	190.667	285.62	774.367	470.667	283.443	274.486	182.73	106.109	127.829	264.478	258.343	213.16	222.186	188.375	312.231	237.948	193.316	160.443	110.526	335.875	255.722	102.81
	114.338	332.215	179.407	355.928	647.308	32.2179	259.237	311.577	661.73	325.474	313.041	145.232	184.429	125.269	127.392	232.26	229.746	301.957	218.627	188.769	303.122	452.662	301.203	157.875	102.471	218.806	241.448	129.321
	125.536	273.616	120.474	357.525	167.313	79.2609	211.821	262.658	640.815	313.794	335.833	164.485	165.414	130.705	135.099	235.103	203.892	288.441	256.595	224.237	248.609	449.822	322.29	170.214	102.61	293.541	233.3	88.6716
	98.9595	292.169	104.214	344.924	142.797	67.5294	224.604	300.372	570.585	483.705	300.559	179.582	143.704	83.0641	123.789	173.508	263.603	245.076	285.388	208.438	337.449	463.333	372.183	242.305	107.054	116.839	260.588	112.137
	128.933	485.697	128.547	382.947	653.123	72.0147	168.169	317.486	654.924	363.753	408.967	261.4	138.175	134.415	102.121	271.317	237.29	209.364	299.026	195.965	270.354	441.955	449.787	265.25	89.6842	176.533	199	113.478
	135.167	294.78	239.703	302.061	125.41	63.9028	207.696	275.556	548.282	358.539	182.017	152.123	147.85	95.7424	99.8718	191.565	232.603	212.194	272.589	192.814	313.493	241.358	297.131	317.217	106.667	263.047	248.946	111.436
	125.066	294.592	97.5897	291.65	684.634	74.359	167.966	301.368	764.5	472.039	245.562	155.369	146.603	91.5714	117.175	239.5	270.672	319.458	195.986	214.026	307.81	382.986	274.214	120.276	112.064	181.73	219.25	102.359
	132.509	521.648	122.522	312.667	696.899	67.9444	281.422	279.092	492.151	491.194	335.731	166.738	168.212	93.8312	113.179	227.967	204.014	229.681	244.933	243.725	277.603	334.299	223.776	155.203	99.1139	281.456	251	90.4615
	115.5	421.59	103.862	332.718	778.346	62.5769	175.4	278.328	291.814	521.7	291.895	159.758	140.284	155.384	104.946	214.172	271.772	326.679	232.722	255.192	338.433	461.687	325.81	137.815	95.4638	220.676	220.804	93.8356
	131.183	388.047	158.561	319.821	378.388	66.9365	358.888	242.577	550.87	435.493	309.026	143.653	158.783	106.481	101.793	239.917	211.145	144.824	232.754	175.415	275.176	427.672	199.554	201.877	105.781	79.5263	262.449	106.586
	145.3	535.702	132.625	316.09	588.443	87.3167	319.247	236.141	590.625	292.607	354.026	160.704	159.806	98.983	115.826	228.378	223.347	223.19	239.625	219.026	294.718	411.902	382.945	195.239	97.6494	225.486	237.934	98.625
	143.474	296.041	125.224	298.545	114.903	135.653	161.947	299.291	753.782	390.803	273.891	162.873	134.4	96.6528	95.1972	217.158	225.016	219.053	256.573	217.716	300.571	451.067	333.464	203.864	110.934	138.439	246.466	85.859
	153.241	472.794	124.654	362.865	635.651	221.788	225.413	241.473	705.623	607.934	327.068	314.892	140.556	100.984	105.25	219.169	268.696	260.405	234.333	181.521	289.892	397.971	348.517	238.931	100.716	311.568	203.647	98.5195
	119.915	301.986	119.595	342.87	544.055	47.4265	179.974	341.5	748.197	187.833	338.175	194.321	153.954	99.6406	96.7936	246.014	220.018	265.167	250.175	196.211	279.458	492.809	245.282	185.441	111.1	158.478	236.085	99.6452
	115.274	289.388	109.324	399.696	617.551	82.3125	190.063	259.554	570.875	510.145	354.527	251.762	152.739	140.1	110.634	227.988	377.361	152.615	250.038	226.221	345.421	471.158	369.633	112.385	100.873	277.069	268.2	122.922
	136.269	300.356	116.108	407.85	172.188	68.3594	222.607	246.607	621.905	554.785	338.25	218.763	169.359	87.3125	92.1139	238.721	257.45	280.724	279.328	197.243	302.314	451.415	305.815	122.133	108.833	438.641	240.791	107.741
	124.2	293.971	117.526	334.614	128.116	80.3385	177.519	257.817	563.525	393.857	310.885	240.187	148.171	96.8148	102.836	216.78	190.397	277.5	239.6	220.982	290.482	497.217	358.583	150.467	104.031	154.026	274.961	113.567
	100.769	347.77	133.518	323	580.662	109.385	191.672	267.545	797.456	273.974	312.266	245.472	146.75	101.831	103.377	216.244	243.2	174.212	243.609	227.7	280.317	471.705	304.789	178.621	96.4189	261.672	259.15	107.414
	121.369	296.694	128.539	299.078	550.875	32.2281	249.857	220.203	613.726	629.128	346.692	208.965	159.763	109.806	102.051	269.738	236.029	218.436	261.016	222.132	309.757	626.769	282.58	175.086	106.025	111.627	228.098	96.3571
	147.658	442.982	111.649	335.339	664.946	58.0794	273.518	267.141	692.78	620.065	213.262	151.614	130.925	103.56	119.211	240.741	225.14	321.068	218.983	237.919	271.846	489.875	291.8	212.69	102.281	384.82	235.803	102.055
	111.838	322.528	98.6154	292.837	699.475	39.439	185.514	246.068	865.923	431.711	335.529	153.164	166.029	185.526	97.6866	223.577	230.167	260.559	257.103	176.984	326.087	451.194	301.033	127.787	99.6571	228.552	222.712	113.1
	146.551	339.423	111.19	346.071	120.973	58.8182	248.451	299.901	480.189	582.197	333.649	209.233	146.742	78.3509	114.403	204.122	208.487	183.254	199.948	220.452	296.03	470.515	287.192	197.203	96.9595	240.233	273.446	107.5
	107.811	533.276	130.918	343.422	101.753	76.2742	230.922	243.276	652.203	171.557	334.292	171.238	157.367	100.816	103.039	233.041	256.016	274.147	227.013	209.907	301.415	345.053	362.45	238.893	83.8592	252.974	341.609	110.667
	112.592	332.254	146.367	345.113	114.724	66.4267	211.889	375.033	714.273	528.958	239.092	158.079	139.933	109.738	105.718	184.458	257.653	242.886	257.108	265.06	316.792	449.013	384.273	146.85	93.4675	196.449	233	90.0441
	142.074	304.491	110.8	331.179	686.443	39.0694	229.07	256.139	610.137	166.92	251.553	157.772	143.329	92.5132	110.912	169.118	242.105	235.079	263.138	225.125	341.618	423.513	368.597	121.747	106.293	268.203	261.661	92.2338
	105.577	293.797	111.151	371.885	618.788	58.7586	242.18	304.733	701.013	215.654	296.8	167.015	167.651	102.26	100.789	229.87	158.544	262.365	195.494	225.63	302.179	411.859	263.567	161.172	107	183.654	297.039	121.133
	123.803	362.833	117.708	279.351	678.294	46.378	208.167	239.391	618.192	570.226	452.244	150.961	158.618	138	100.237	214.773	163.571	223.054	279.067	224.155	318.61	423.821	326.052	140.985	100.133	95.9077	332.328	109.931
	136.696	297.118	148.69	294.986	111.395	68.7541	190.87	266.857	674.803	496.262	404.936	169.328	165.662	99.8289	95.8125	215.342	256.783	170.412	199.507	173.043	269.052	385.879	323.041	262.239	113.343	207.847	212.423	99.8852
	123.161	451.851	109.294	304.214	106.31	59.0556	213.824	240.154	703.833	715.526	325.482	190.338	137.328	90.2027	120.173	257.466	223.594	174.576	198.789	168.636	316.783	419.143	307.962	131.794	114.379	237.389	243.041	98.3731
	123.937	294.514	114.37	336.278	549.6	85.1228	214.39	305.473	543.017	642.766	391.729	165.754	160.884	139.107	105.638	196.595	221.266	267.868	205.855	247.186	409.958	454.888	228	157.307	115.541	158.447	228.657	109.264
	130.145	263.789	109.043	317.725	721.987	41.8955	232.717	310.623	593.76	444.8	283.85	184.7	133.987	108.905	103.812	198.444	170.188	280.8	195.27	166.786	306.746	422.307	330.914	136.359	101.327	227.518	293.123	104.162
	108.234	294.047	108.464	283.82	580.158	132.231	276.74	275.733	649.961	461.427	174.778	156.256	142.443	90.6286	111.64	205.779	271.057	177.305	242.684	155.925	268.359	468.057	326.138	234.307	93.2785	168.983	201.158	102.704
	139.237	290.657	104.552	362.716	163.224	40.6786	403.253	292.561	663.225	646.077	242.014	174.143	144.637	184.405	110.512	200.357	219.631	200.109	256.649	210.912	272.431	521.736	337.097	154.167	120.2	310.403	242.293	98.7639
	129.824	290.816	125.13	370	677.151	64.2034	117.184	312.828	277.026	543.076	317.695	139.533	130.522	92	109.955	225.052	162.552	248.101	297.053	235.5	306.64	470.309	309.663	144.169	116.986	238.141	227.194	92.5769
	120.446	512.863	115.298	344.133	76.1481	62	281.794	236.623	708.089	502.232	220.076	162.702	177.831	147.487	101.914	216.385	254.726	149.321	204.304	211.271	270.431	482.706	234.41	187.962	84.569	115.324	263.141	107.5
	134.116	522.934	120.559	324.458	671.905	87.942	333.868	289.845	702.632	428.955	311.035	188.143	147.23	157.373	105.944	250.215	193.722	248.954	198.815	276.778	263.088	371.747	325.328	147.914	101.561	279.985	238.1	113.286
	118.545	295.389	129.91	261.418	661.571	39	313.344	275.31	414.014	523.127	320.672	150.75	152.573	185.222	100.783	199.896	233.871	262.557	212.203	231.152	343.114	493.974	236.924	175.405	93.0526	238.286	222.75	111.278
	109.569	278.149	131.622	377.552	100.971	36.8875	199.517	322.623	672.894	684.426	353.536	139.508	142.676	125.684	100.382	240.395	219.544	221.308	249.542	237.594	242.042	557.033	202.338	211.726	112.737	278.875	247.067	106.23
	135.785	469.676	131.625	376.403	94.9492	52.1077	297.218	253.25	714.169	503.812	251.259	163.896	153.541	108.897	121.714	207.269	155.841	201.197	169.855	218.243	239.658	397.274	378.743	237.525	110.813	246.974	231.406	98.0303
	122.845	325.449	121.661	331.778	552.298	54.5085	237.414	257.922	687.81	363.608	335.539	152.645	144.519	103.823	126.162	258.924	240.81	312.397	226.013	221.015	315.828	493.05	317.467	122.931	116.095	223.338	256.889	105.986
	104.983	301.114	114.718	255.953	636.854	62.4068	212.814	354.959	918.633	454.885	354.372	204.066	160.167	107.397	133.351	173.478	274.667	225.452	245.4	211.732	311.814	424.32	279.171	187.346	109.547	326.653	238.531	87.9459
	132.873	428.88	92.7846	298.648	95.7436	60.75	233.772	308.213	932.475	472.875	333.747	173.298	157.426	100.899	101.644	209.167	244.304	212.25	212.5	205.618	234.324	381.266	298.847	176.7	103.973	206.366	241.754	110.757
	114.421	275.742	117.462	330.778	594.719	68.9494	259.031	306.508	389.971	690.638	269.56	183.703	166.293	119.662	141.683	195.902	253.742	205.435	204.667	227.456	249.633	469.4	244.893	216.658	97.675	417.662	257.254	89.8406
	141.216	483.447	101.048	321.59	644.103	75.2319	254.232	271.052	548.766	387.657	299.811	142.39	179.466	214.932	102.539	198.696	254.926	170.189	329.464	205.386	307.924	379.761	316.652	235.795	95.2763	139.512	289.549	101.045
	120.519	277.018	99.1519	268.359	259.712	57.8308	207.016	288.692	741.792	337.014	336.677	175.597	163.551	127.784	124.229	268.515	220.254	204.875	245.192	216.82	312.475	516.329	373.75	174.014	99.7458	180.605	263.333	100.125
	112.852	407.636	119.698	296.033	121.375	63.2759	125.415	282.986	754.824	549.324	343.615	195.946	149.027	92.3793	119.657	224.948	261.914	235.679	140.07	186.578	229.085	382.879	330.444	246.8	86.8312	51.3714	252.346	109.015
	128.182	297.639	129.593	250.042	627.881	77.8667	203.297	264.379	726.279	249.25	401.885	169.797	160.716	102.333	125.836	275.083	188.913	162.773	254.441	217.415	321.456	464.41	283.621	282.688	101.671	79.6282	254.368	106.303
	122.986	304.744	110.07	312.533	386.053	70.4151	258.851	282.656	640.883	540.25	554.836	142.459	165.042	124.197	113.62	269.908	203.038	212.814	247.507	222.391	238.723	350.954	286.69	148.792	108.959	119.869	283.35	95
	146.947	480.443	111.236	297.983	611.96	48.4643	191.553	313.394	411.89	278	170.086	165.107	161.271	209.387	110.746	192	194.824	196.72	216.016	200.028	249.655	416.356	358.028	189.443	113.089	96.2564	185.841	93.8033
	114.983	331.237	121.068	354.026	641.479	89.8971	95.9	270.464	449.741	590.027	410.714	166.949	164.197	136.984	125.328	199.485	212.378	188.461	281.377	230.639	288.103	492.324	328.526	192.625	96.5636	317.836	275.365	92.425
	121.342	538.443	118.528	340.884	126.438	86.8676	259.461	283.474	791.559	479.325	269.741	161.325	145.896	133.296	128.107	240.292	230.301	250.468	182.316	211.283	197.547	474.443	352.87	130.303	111.234	221.309	258.059	92.8
	120.165	334.046	123.117	290.266	105.036	98.2192	173.329	270.448	729.522	347.049	329.029	182.014	148.5	158.529	124.177	182.775	230.596	180.049	237.864	201.397	304.44	472.225	316.059	195.923	100.279	149.121	212.5	98.8197
	107.231	300.797	118.667	334.053	401.603	121.438	203.152	304.607	812.868	394.77	261.416	239.181	159.769	127.693	123.872	225.5	198.557	239.347	201.029	210.433	288.231	388.147	289.365	165.727	118.368	250.372	206.131	97.7273
	131.724	516.579	136.878	386.328	78.9091	44.6364	229.722	271.461	997.545	247.013	305.676	212.405	137.797	138.873	144.551	220.983	205.584	244.351	265.954	220.267	246.588	435.387	429.051	270.516	97.0822	154.462	244.099	91.026
	124.345	388.241	107.438	301.145	454.649	129.328	196.433	243.725	676.5	131.563	279.039	247.079	149.679	90.9079	130.27	226.909	144.903	285.305	234.375	252.868	300.462	435.625	397.138	146.921	99.8393	157.492	227.403	115.108
	136.303	294.323	114.73	333.112	437.351	85.8481	183.616	316.194	583.2	293.295	523.049	150.562	237.838	111.776	96.76	215.964	190.174	146.808	227.525	191.338	283.821	379.806	489.507	161.628	115.478	285.867	181.703	118.949
	118.534	313.371	109.737	310.107	248.475	122.372	212.176	270.931	728.041	358.556	365.727	134.647	167.026	112.708	118.831	212.62	211.889	222.662	244.188	202.116	285.518	398.171	438.164	178.065	89.1017	258.861	180.471	103.662
	113.25	369.283	131.382	319.831	332.071	90.7321	222.639	346.861	726.658	310.679	411.867	175.307	158.015	125.493	92.4756	207.59	172.857	302.864	265.261	206.286	264.325	216.781	410.984	236.724	107.308	301.25	235.446	111.667
	137.269	289.923	114.532	286.548	398.59	59.9306	231.621	285.65	889.984	410.653	254.145	165.982	155.171	141.242	119.119	170.434	199.556	231.321	229.81	225.734	355.262	379.825	460.2	275.213	89.9091	179.667	226.446	113.047
	125.7	368.017	133.672	285.754	265.978	42.3043	207.961	303.013	673.257	386.914	325.678	152.808	156.686	136.987	110.397	209.565	190.157	274.239	240.429	224.589	285.864	505.6	361.316	136.544	105.785	189.762	265.973	93.973
	131.059	410.578	127.039	249.532	109.943	69.3582	144.75	264.237	375.917	353	320.48	169.463	174.646	144	107.6	208.946	176.211	136.075	290.077	288.155	307.468	432.638	349.877	131.493	110.22	201.282	236.72	103.606
	105.922	284.344	127.91	297.317	361.244	105.517	192.89	284.115	671.754	222.035	311.014	114.145	152.613	104.59	124.705	190.929	197	227.455	254.756	209.053	348.319	425.762	430.557	153.313	100.514	257.969	249.661	110.96
	140.427	359.558	113.47	268.072	470.051	65.3513	179.641	238.09	273.091	454.015	382.972	190.424	154.493	140.014	125.75	261.57	202.765	255.509	220.308	204.014	283.426	620.464	305.273	191.914	115.565	436.338	295.217	108.776
	114.64	456.667	127.136	316.85	444.507	82.3973	307.457	315.39	825.927	272.929	339.07	150.577	149.232	253.693	111.709	180.132	199.514	158.855	249.466	238.8	268.792	380.986	390.123	230.07	106.014	361.828	211.034	106.025
	126.974	301.37	107.029	324.286	215.405	55.0909	154.359	272.077	891.188	382.088	399.507	165.041	166.244	127.049	109.159	177.242	204.803	202.013	135.261	232.153	243.942	501.865	423.2	194.908	95.2308	250.203	276.731	101.106
	108.403	291.064	119.025	228.732	115.292	119.5	190.091	275.1	1010.1	451.051	327.756	172.276	160.895	183.175	104.368	210.078	216.06	193.974	163.754	211.803	272.969	410.313	489.072	128.031	95.2188	186.538	250.462	99.4267
	115.41	310.632	133.411	378.153	110.689	197.222	264.36	285.571	549.892	400.765	276.784	171.471	147.077	223.883	116.464	193.891	199.266	253.279	321.646	153.903	324.323	417.698	333.254	146.831	97.9701	169	234.695	102.333
	119.611	307.108	126.101	270.838	185.125	440.068	227.225	245.164	597.813	117.339	380	175.136	168.823	120.718	116.951	164.143	208.987	265.974	280.029	200.514	290.526	472.118	286.253	200.671	102.922	291.5	263.171	120.549
	127.971	573.68	59.0488	272.328	413.053	201.321	207.014	263.783	665.702	396.635	279.208	188.636	215.831	108.372	120.167	187.744	203.568	229.719	286.211	211.465	263.935	402.323	359.217	186.522	94.9359	159.946	298.792	105.017
	116.77	321.779	112.115	288.426	454.476	250.474	274.778	267.219	662.567	355.35	185.768	174.259	174.145	95.0253	96.6167	204.924	183.8	110.923	239.493	231.648	270.551	429.692	377.411	218.768	100.3	193.75	244.536	97.7105
	115.559	293.333	140.169	268.794	424.827	541.39	238.912	280.731	937.076	435.25	326.746	186.154	173.375	126.539	123.448	176	249.456	160.214	258.041	258.725	267.418	454.342	359.818	100.656	100.661	287.369	260.569	108.254
	134.875	308.239	107.697	338.592	358.768	232.308	232.759	278.769	681.575	378.811	196.696	166.654	151.605	114.667	127.529	183.649	202.03	239.043	275.729	188.203	292.821	495.662	384.185	155.684	120.029	192.015	241.2	109.493
	112.403	571.493	112.813	278.78	287.679	138.377	270.031	332.982	665.759	158	330.5	166.357	162.909	125.322	117.031	200.147	291.171	228.421	305.644	208.523	251.462	429.383	474.13	146.642	123.5	351.814	309.035	121.025
	101.701	285.443	110.607	305.123	87.1333	178.969	185.675	228.73	842.236	419.197	383.297	159.14	151.746	127.359	144.797	184.857	169.754	208.597	192.184	180.867	262.768	528.61	339.471	133.43	117.254	200.974	236.132	102.918
	122.831	334.958	116.924	315.842	110.827	143.571	137.982	263.236	889.803	539.625	168.924	156.068	159.762	112.903	100.986	176.883	195.768	214.405	262.211	257.672	293.145	217.636	366.587	268.205	114.672	112.867	244.589	109.338
	120.434	309.853	127.194	257.775	207.527	59.8814	213.492	232.145	814.884	309.891	418.247	172.229	141.108	141.159	99.4559	207.482	149.85	252.053	298.416	210.311	270.103	453.621	323.218	241.855	109.397	203.082	244.697	94.9747
	110.289	342.034	100.295	281.274	137.917	386.371	241.949	264.529	697.338	509.038	258.682	171.987	143.806	180.404	118.458	194.13	191.538	280.656	253.246	233.175	292.411	376.646	294.241	116.466	110.15	178.092	221.928	81.3333
	109.205	648.506	122.203	309.35	376.885	310.827	222.074	273.687	573.375	310.571	377.35	152	173.73	157.723	109.5	203.469	181.658	211.672	288.444	261.518	365.487	450.471	369.714	93.5441	107.318	188.047	233.756	113.016
	116.786	353.439	114.185	311.075	362.707	442.092	202.845	255.317	483.833	193.15	304.345	153.211	141.351	176.576	119.327	178.952	142.338	226.722	229.934	195.653	304.381	426.636	321.725	125.9	108.141	227.741	232.258	96.1268
	116.615	294.973	127.141	269.587	432.329	336.962	197.468	314.603	703.216	313.018	204.708	143.295	151.686	126.933	117.63	183.225	207.236	237.192	244.619	229.209	383.475	453.625	379.239	195.095	103.729	275.667	226.033	114.44
	114.266	322.183	130.711	246.969	358.517	485.81	270.203	219.355	866.143	445.908	460.829	184.747	174.162	106.118	108.835	182.611	210.896	256.304	211.712	152.486	233.86	476.467	391.797	189.07	103.333	251.377	246.711	98.35
	101.215	657.068	145.678	230.139	516.697	136.339	246.309	244.9	578.04	374.2	380.312	282.783	151.912	102.149	125.544	214.015	180.194	226.691	182.079	250.5	293.085	442.014	233.474	220.652	109.449	107.236	207.421	109.351
	111.914	283.921	136.205	251.289	435.25	370.9	266.292	204.324	986.471	216	569.95	161.966	150.8	105.077	114.224	191.692	174.313	187.868	215.702	250.087	235.986	349.782	361.026	194.344	104.72	226.521	280.607	94.3438
	126.347	624.684	165.364	277.141	127.1	85.5424	234.237	228.536	709.25	615.704	364.82	356.561	213.456	99.1857	116.585	181.8	215.313	238.658	218.42	214.644	238.757	478.577	313.671	170.889	104.152	273.69	249.11	94.2667
	138.887	387.942	125.595	288.776	91.7536	161.875	127.466	228.549	542.972	159.443	330.649	153.176	156.776	113.257	116.55	184.23	173.484	238.987	244.349	231.605	268.859	399.487	362.239	188.738	113.568	95.7581	225.803	97.0909
	149	399.203	152.615	325.936	383.082	363.424	242.123	252.026	654.203	235.031	435.323	199.961	142.987	101.416	132.423	176.684	266.726	262.452	288.375	190.746	305.62	367.75	403.881	198.256	87.9016	224.932	231.246	88.7679
	164.25	326.846	50.2542	258.803	436.573	424.149	259.258	286.424	782.442	399.766	292.137	269.187	153.466	98.875	130.714	172.461	163.647	198.077	266.509	211.833	275.718	468.113	288.718	158.831	107.844	237.148	235.119	90.3
	310.987	307.145	101.506	436.569	470.013	363.636	188.043	703.291	574.649	464.579	468.73	171.987	149.058	106.983	124.675	180.211	168.41	241.155	289.817	187.89	260.438	407.205	437.931	280.696	94.9079	193	229.758	110.984
	169.725	285.75	134.256	265.348	254.408	250.288	251.232	678.968	722.18	498.464	365.155	177.05	112.27	102.414	123.135	188.641	182.974	244.466	265.767	257.078	312.564	430.787	411.282	333.824	127.508	144.208	255.232	91.3026
	238.385	407.443	119.443	252.833	657.886	324.864	203.347	783.228	672	590.885	299.833	272.072	157.643	97.6232	127.746	182.758	246.274	185.918	235.431	203.311	267.46	298.169	354.946	336.082	100.312	185.804	234.885	108.45
	163.757	326.091	102.077	247.847	367.866	335.105	233.089	569.383	882.763	527.857	445.788	142.653	155.455	110.066	101.757	168.493	281.662	245.451	241.901	207	250.885	473.593	294.328	190.493	107.309	251.493	272.472	108.515
	306.75	310.879	116.987	274.069	364.066	410.615	224.117	650.169	551.466	312.063	349.413	220.681	165.632	105.881	133.662	310.873	284.761	237.987	236.038	194.05	231.441	223.349	348.759	129.986	96.4658	270.722	256.78	101.239
	299.661	319.158	95.6104	297.513	401.519	319.897	191	568.689	743.942	545.19	443.985	280.086	172.957	86.9296	99.8028	336.766	219.538	265.425	245.164	185.681	306.697	427.914	333.311	120.927	95.84	239.915	159.081	100.549
	156.897	260.571	131.621	271.826	380.034	272.016	229.261	457.343	346.662	411.508	239.575	162.026	133.618	103.446	111.169	242.3	279.108	149.24	234.757	217.912	274.932	553.145	323.226	149.421	87.6528	333.386	223.785	93.4714
	477.968	315.355	118.351	254.745	556.297	392.628	170.813	598.128	211.765	511.557	306.813	158.886	149.264	96.7432	117.91	324.181	240.47	233.913	220.705	254.354	265.345	301.971	439.426	127.129	125.974	270.857	243.807	115.39
	186.237	298.955	108.855	300.909	196.419	349.615	221.818	573.836	755.817	348.709	213.306	146.292	227.903	88.2632	116.538	266.717	271.42	242.276	237.833	178.716	285.014	323.351	284.972	132.386	133.414	266.875	196.556	90.871
	294.382	352.086	113.485	269.773	94.8933	454.644	228.1	579.284	912.957	703.386	258.39	163.838	169.556	92.525	105.314	299.813	249.552	230.877	239.239	203.406	232.276	449.5	660.217	136.457	106.443	310.87	270.721	106.319
	144.7	480.899	124.567	264.797	184.397	390.935	210.537	791.475	783.559	429.351	525.397	177.525	162.787	107.145	109.338	302.618	164.59	208.448	313.295	211.066	279.463	328.657	307.143	98.6282	112.35	229.625	197.897	100.196
	288.583	359.564	133.123	266.435	495.732	405.437	253.081	556.21	827.803	497.348	339.59	174.242	155.394	91.7091	106.95	318.59	267.507	250.475	211.188	206.333	271.855	407.03	711.939	172.288	103.714	208.697	254.123	98.8966
	251.8	587.569	110.8	347.819	357.262	378.821	252.643	503.53	645.292	519.233	386.85	166.551	141.101	112.699	109.056	366.231	249.171	213.77	266.183	230.486	260.31	423.062	612.877	167.986	102	230.962	249.257	102.243
	379.545	303.016	102.104	328.257	383.6	112.872	221.07	567.254	891.397	149.584	47.3103	151.259	152.6	110.114	117.57	327.095	252.737	236.066	189.639	255.474	261.525	352.074	251.881	258.247	114.432	255.821	215.828	104.06
	267.813	355.948	110.731	274.806	243.528	447.196	265.726	454.441	622.547	416.354	175.203	159.393	141.5	286.121	115.3	242.863	327.773	238.344	177.28	230.441	218.984	417.246	665.934	169.61	112.767	214.806	236.794	93.6029
	162.706	472.485	126.5	256.3	101.734	297.014	218.258	713.808	573.154	463.133	202.982	121.671	144.046	347.5	139.493	231.492	156	234.899	241.42	206.313	138.913	277.958	672.971	194.193	91.0702	206.435	250.864	101.547
	247.883	402.164	111.541	277.076	355.462	371.486	205.968	533.276	701.013	567.456	221.881	117.3	175.147	161.364	118.891	323.131	80.8814	188.139	305.712	165.236	195.2	391.872	652.312	107.661	103.288	164.257	196.949	106.818
	219.184	297.676	93.4744	269.879	489.672	276.836	214.43	696.587	820.985	404.465	174.491	168.5	155.063	177.3	116.03	251.44	68.5932	199.6	261.614	200.076	174.271	533.471	295.649	115.688	99.8781	138.544	243.473	111.684
	229.934	317.638	123.893	277.25	423.873	342.912	208.141	320.675	904.133	436.967	284.253	146.786	206.13	157.293	120.806	260.55	58.3393	234.985	265.076	193.641	197.574	358.583	704.359	167.985	97.1169	192.309	268.758	81.1875
	178.393	459.756	107.709	279.862	527.603	271.959	213.246	714.881	678.435	461.938	165.581	156.827	143.279	198.846	114.612	152.236	79.1429	223.31	208.507	236.609	189.772	321.623	938.379	167.943	115.355	150.234	223.704	93.3636
	208.328	305.472	112.274	287.071	477.233	339.323	258.177	774.268	549.613	550.648	261.068	144.217	156.225	172.2	114.105	262.804	70.45	133.329	300.064	235.683	176.77	515.683	511.261	202.247	106.056	227.791	244.154	95
	278	531.513	117.662	254.101	97.2333	338.25	316.127	543.323	572.597	743.1	226.127	175.632	126.037	141.784	115.308	318.132	52.961	212.463	252.2	220.773	188	548.783	379.086	217.972	96.5067	196.125	270.861	86
	310.868	314.942	103.19	315.521	440.123	372.5	238.461	591.656	855.5	189.195	247.775	155.538	121.5	128.24	103.553	281.143	49.6061	102.107	210.623	211.806	210.825	400.361	357.514	197.273	108.809	119.514	222.018	111.224
	198.565	340.12	98.75	435.725	370.821	338.947	199.983	681.328	450.074	644.676	241.041	174.975	158.882	158.913	126.114	278.652	66.0351	183.825	275.833	186.964	187.73	370.753	741.308	179.539	109.393	176.988	250.551	112.521
	204.986	295.651	101.851	403.243	236.065	308.786	274.966	650.139	906.389	170.691	263.686	155.554	147.474	410.724	137.063	293.949	45.4868	211.143	230.472	307.122	130.341	419.909	537.603	134.695	92.5172	234.6	208.588	116.922
	225	318.255	95.4154	439.763	483.23	343.461	221.35	486.26	766.747	235.756	195.893	156.759	223.105	159.362	104.597	303.103	55.0429	175.515	225.76	157.464	188.5	449.746	582.207	296.625	120.417	180.449	215.908	97.4776
	205.761	317.708	124.291	412.091	212.986	359.013	226.984	594.5	749.045	179.526	377.684	170.129	154.485	192	110.746	322.769	240.743	215.486	218.614	157.745	349.885	378.833	437.537	239.303	92.3289	203	243	95.5949
	315.213	302.656	113.768	405.169	283.898	359.69	235.646	526.6	547.633	580.737	237.36	67.8209	156.985	117.662	101.258	307.316	84.3896	211.45	282.681	210.901	321.123	273.436	251.286	278.625	96.8393	261.591	197.449	128.797
	290.545	325.571	138.434	371.373	335.909	398.954	103.482	541.448	856.667	583.938	255.5	72.6071	157.405	192.597	101	304.653	264.301	196.443	228.221	214.649	293.95	473.554	849.409	255.523	104.952	147.924	250.161	115.254
	165.354	351.017	140.108	426.442	385.162	445.763	208.239	400.54	467.529	592.9	257.239	121.806	157.557	203.012	106.27	206.406	323.263	223.015	253.684	179.618	354.586	366.803	238.638	239.059	100.813	202.333	218.632	107.5
	250.435	292.93	116.561	470.937	614.322	195.905	256.452	495.057	856.154	640.704	171.695	115	152.191	233.644	137.5	245.675	63.0286	308.823	173	203.421	288.696	567.6	730.638	134.792	108.917	171.821	242.422	104.706
	306.685	479.803	113.982	432.303	258.839	350.757	235.164	607.797	536.439	388.879	223.964	155.986	159.043	93.1184	120.394	225.139	293.776	275.017	281.056	193.846	363	425.415	303.343	141.379	110.188	178.051	195.9	100.569
	191.763	299.455	140.958	390.881	286.529	368.121	279.537	625.831	259.351	490.632	292.197	150.25	159.938	75.5469	124.354	236.911	174.613	250.194	239.292	225.304	309.963	415.242	560.077	242.5	102.371	192.131	263.818	103.743
	283.929	277.316	128.5	439.859	436.358	413.603	302.514	513.75	445.89	146.829	220.342	129.045	265.905	101.574	105.69	325.439	236.352	270.712	261.016	235.161	290.075	340.5	344.259	144.663	96.9861	188.764	261.638	115.69
	376.429	370.947	132.986	334.269	207.076	397.3	242.29	616.359	475.177	153.847	298.188	164.969	187.821	61.4474	132.053	297.423	224.097	227.754	254.776	210	337.651	402.257	271.361	94.5833	124.909	224.886	278.696	106.427
	346.25	319.771	47.7606	387.56	363.692	387.214	211.643	576.053	432.717	536.065	225.571	164.861	160.31	105.974	105.346	341.184	265.64	283.134	230.861	200.632	333.763	379.657	641.303	141.178	110.241	115.89	256.297	113.89
	170.839	488.984	36.6912	424.288	388.05	387.815	253.46	611.189	222.853	500.47	216.3	156.8	168.232	134.103	110.169	244.725	230.696	254.613	241.806	173.705	330.57	350.808	575.378	148.195	127.268	176.164	254.111	95.7429
	193.379	322.75	169.43	377.091	343.413	295.56	196.413	594.538	629.356	622.172	229.197	134.962	147.466	124.816	125.518	348.39	297.763	250.279	144.095	211.197	370.842	473.112	327.045	180.772	112.244	240.053	219.75	105.662
	167.486	254.615	197.654	401.609	630.225	366.97	251.902	477.425	490.771	418.104	208.268	107.931	163.831	121.169	95.7636	201.31	298.973	277.246	210.237	207.309	320.25	475.855	322.051	349.615	124.859	94.2727	201.415	125.672
	238.158	303.625	316.047	320.595	373.471	375.821	245.183	452.212	306.393	484.13	270.397	153.8	154.987	109.597	118.667	251.117	135.868	243.969	150.429	228	306.705	336.873	428.772	121.691	113.129	147.975	152.061	72.0886
	170.35	266.213	264.615	356	308.853	286.922	139.959	447.753	348.737	487.244	210.14	155.597	147.819	120.667	110.6	279.429	254.951	257.443	166.405	208.241	262.985	422.386	600.262	143.232	124.29	147.066	234.25	96.5781
	157.107	466.679	187.153	326.231	405.123	360.032	181.382	434.278	562.436	401.597	269.182	129.136	166.55	125.466	130.667	148.845	83.1605	211.314	257.114	236.676	181.582	355.607	800.569	146.286	92.5833	162.863	222.294	96.5079
	152.892	295.423	288.682	332.849	408.25	412.741	180.785	439.211	402.053	789.883	329.571	129.696	172.013	121.253	120.863	235.308	323.257	196.471	197.337	259.582	195.9	392.312	482.478	157.736	84.5797	122	291.212	105.367
	191.333	312.314	327.5	375.865	540.112	415.817	204.795	335.198	406.566	567.291	219.982	75.3	159.974	102.759	119.838	195.655	171.66	226.897	217.944	244.385	312.05	315.821	618.045	376.81	82.7727	167.835	224.486	117.537
	200.255	279.707	266.164	402.091	538.271	287.32	155.828	464.8	435.708	370.426	257.723	112.862	144.087	88.4177	103.08	238.409	231.474	272.243	195.958	189.778	310.508	598.625	606.838	148.262	119.293	210.38	232.896	124.5
	299.957	284.085	129.5	381.014	357.661	336.406	176.105	640.071	320.27	584.878	261.152	152.111	154.541	90.7971	113.973	210.416	229.718	218.824	268.514	207.613	363.014	266.561	537.82	226	94.8767	125.241	86.5479	103.448
	347.37	347.155	256.316	383.691	444.138	358.169	199.284	579.4	270.211	546.029	232.397	179.722	156.244	98.9437	123.449	256.013	283	245.754	294.218	216.375	335.833	343.605	572.987	274.438	127.188	148.212	231.25	83.662
	213.911	602.875	307.857	405.434	220.731	162.529	180.27	457.667	562.167	423.984	275.867	157.307	172.362	99.6757	115.366	204.744	189.754	223.323	272	218.433	307.922	503.638	431.716	258.526	100.203	144.696	216.304	97.5195
	141.03	290.429	336.778	365.194	324.923	350.446	146.061	456.949	461.23	571.417	172.246	151.933	139.789	128.633	108.468	205.138	232.694	192.835	279.443	169.338	378.557	318.519	758.145	248.795	108.164	239.466	242.378	100.72
	175.033	327.128	253.269	295.737	225.072	455.136	144.211	563.776	369.414	532.78	227.836	101.3	159.5	128.932	119.051	244.031	204.883	207.091	252.193	216.372	244.243	291.197	448.106	151.143	97.75	141.038	248.899	116.266
	185.603	348.403	226	361.448	216.383	347.677	277.18	611.431	194.87	412.921	179.333	95.322	155.418	119.556	117.786	249.613	162.382	197.183	222.316	227.333	316.278	276.632	490.37	246.806	109.333	182.026	221.765	106.868
	289.951	343.349	125.125	364.857	129.725	326.536	207.067	646.971	455.595	359.987	315.087	151.36	137.5	114.506	131.338	254.139	225.071	190.506	208.387	196.162	350.884	296.461	521.081	224.725	108.567	143.352	194.982	109.183
	242.106	546	185.241	376.263	226.259	349.929	168.81	463.939	610.667	456.65	168.956	151.595	157.228	110.65	119.75	245.625	284.764	211.701	266.192	229.367	298.932	281.185	462.228	216.472	110.188	163.338	235.115	106.081
	192.544	512.571	249.378	401.121	163.338	434.066	184.189	549.265	460.321	438.6	272.197	171.817	147.813	112.494	115.953	242.672	216.762	190.213	209.935	173.457	284.456	274.342	688.074	191.045	96.6923	110.872	263.897	104.772
	384.19	266.138	244.806	357.014	192.45	279.907	203.887	634.614	521.184	479.256	249.079	154.119	140.676	109.744	109.583	270.8	225.691	184.493	207.012	192.286	359.855	317.517	880.443	152	112.083	189	275.333	108.104
	193.549	489.597	114.849	423.439	134.746	347.328	256.595	464.877	414.224	688.525	296.136	87.3418	166.466	90.3333	122.586	203.566	202.512	178.734	234.89	213.727	371.563	280.417	495.39	316.97	133.612	196.417	203.788	103.375
	339.462	313.284	212.108	368.276	270.644	331.766	191.779	636.068	397.325	183.571	53.25	184.746	164.244	109.487	113.403	193.408	199.224	183.676	222.5	222.117	338.679	325.914	496.039	94.4923	100.189	276.58	230.286	90.7813
	408.18	358.479	122.477	406.921	197.434	328.2	202.372	628.774	405.214	536.75	136.333	166.588	147.723	189.643	112.24	218.969	194.754	351.797	302.422	198.05	278.449	328.983	427.983	133.174	100.646	149.882	242.986	87.0833
	344.851	328	235.052	389.456	189.125	394.076	173.352	603.281	429.026	663.649	72.4478	167.152	156.607	114.214	122.9	248.479	207.557	222.139	209.919	204.03	344.507	306.256	484.212	191.931	104.257	171.938	272.118	94.4857
	308.558	323.235	177.218	387.393	174.93	350.125	200.127	490.357	602.138	402.321	155.813	168.579	166.672	135.721	124.75	260.263	244.018	243.766	229.065	203.515	420.148	223.613	465.145	165.543	87.5	276.5	281.329	96.65
	189.641	330.887	115.074	367.529	217.896	365.95	179.358	638.857	361.972	222.754	226.525	101.508	156.424	134.901	121.406	256.759	202.267	277.508	252.029	221.416	300.783	329.542	439.477	216.254	108.25	152.636	261.457	95.8462
	187.681	383.583	158.897	359.634	132.028	328.787	165.117	528.91	316.301	751.772	206.394	95.3438	157.353	105.974	112.338	245.443	380.866	216.289	210.141	222.492	302.485	178.649	486.377	258.541	98.4557	182.015	279.75	83.6438
	196.373	524	126.684	293.513	136.091	330.542	178.421	602.286	379.289	489.441	340.515	88.5	171.628	100.229	118.725	250.875	451.97	270.264	224.867	206.512	294.898	236.288	630.568	324	101.534	152.397	252.5	99.4167
	228.889	374.169	151.817	332.304	221.145	376.985	180.129	452.451	368.919	534.045	218.208	103.812	169.609	134.852	133.946	222.254	125.122	268.795	240.5	322.722	194.618	316.59	537.658	200.055	102.824	182.506	230.857	109.707
	167.455	306.431	134.569	447.045	156.494	469.063	135.564	436.948	352.141	240.333	256.118	117.143	173.611	113.718	121.241	224.921	324.61	243.377	242.316	209.847	267.961	278.09	580.464	211.966	110.187	176.908	261.377	99.5455
	301.893	234.208	121.743	348.243	311.342	297.383	139.635	491.985	708.027	545.612	308.59	143.813	170.026	102.15	122.615	257.293	134.947	148.236	239.974	208.303	331.177	312.621	479.946	240.185	102.709	182.256	250.016	112.215
	387.359	316.39	129.679	449.651	205.162	326.471	176.053	565.661	413.182	512.808	272.721	145.514	258.451	92.2466	111.423	241.111	322.325	263.435	216.086	184.683	278.682	368.474	399.742	222.323	89.2353	150.776	249.646	105.338
	137.357	304.797	121.096	400.823	167.026	413.707	265.838	696.4	350.014	534.105	241.486	142.25	182.473	118.789	109.423	247.507	360.2	211.635	301.162	202.574	245.93	317.641	452.514	225.863	129.421	168.986	220.803	109.671
	244.294	324.586	111.241	376.961	145.446	350.2	147.986	544.43	416.475	674.696	233.937	130.914	161.844	122.803	123.534	218.382	315.154	279.297	246.5	217.391	339.329	307.1	423.211	188.036	107.844	152.973	219.295	104.589
	230.106	288.453	115.934	340.592	178.348	328.875	173.927	603.705	516.875	575.225	350.763	165.868	149.974	176	116.521	258.415	297.353	438.186	260.987	210.065	260.083	347.707	471.732	202.833	104.577	129.843	308.6	98.7895
	192.317	341.304	97.8	303.478	145.6	340.147	137.922	640.65	327.857	554.474	290.378	164.517	153.571	244.158	122.015	324.333	317.705	260.779	266.016	191.844	333.266	275.286	859.643	239.526	100.947	105.077	254.521	99.9275
	207.319	355.071	95.1613	382.969	305.679	372.442	168.027	620.192	368.568	620.038	191.316	136.478	165.574	94.9467	113.182	223.903	403.803	268.241	233.329	178.041	294.9	357.899	340.132	240.633	106.628	127.459	236.909	84.8772
	181.351	278.426	116.803	411.257	152.39	300.905	170.493	545.167	474.389	583.909	237.448	87.8052	160.049	90.2785	96.2879	244.052	184.982	230.131	203.363	188.558	301.638	261.114	372.421	224.558	109.104	150.072	267	107.353
	179.154	310.149	118.446	382.224	279.458	199.411	178.348	569.897	348.923	642.015	270.451	109.347	159.966	135.797	118.379	207.184	347.305	247.04	229.015	208.762	327.039	352.649	336.083	108.829	103.896	175.895	274.313	94.9206
	184.278	484.467	100.947	324.842	142.577	274.105	251.649	621.3	364.039	589.316	100.271	159.818	132.075	148.246	93.8525	246.649	307.596	277.662	274.754	265.149	415.957	262.423	394.769	119.049	113.269	188.593	244.578	110.444
	189.615	288.44	107.859	330.925	126.455	239.819	179.987	328.529	345.797	723.82	163.286	114.877	174.521	101.584	119.594	232.882	259.443	262.689	293.438	177.577	310.167	301.795	544.027	212.873	112.029	163.25	231.918	123.13
	222.987	326.086	111.317	342.447	200.655	336.826	167.354	653.469	417.586	640.701	278.424	93.9643	173.681	137.405	97.2388	258.013	197	253.371	287.538	203.169	313.337	250.975	300.273	199.147	89.6769	163.217	219.343	121.778
	314.423	320.045	130.841	253.44	166.154	318.429	155.902	601.025	283.611	396.872	364.971	60.1	153.574	98.2462	119.895	279.667	265.686	264.677	217.89	213.947	359.123	217.385	421.169	227.456	108.855	147.313	248.879	102.642
	394.941	347.209	118.761	372.761	302.014	283.079	185.949	256.923	356.539	173.2	278.639	111.123	145.985	91.0769	109.254	219.817	219.722	376.257	135.881	196.614	367.753	310.786	565.885	190.196	125.235	134.083	275.328	111.905
	942.861	343.515	130.127	425.218	140.446	394.955	168.676	292.563	680.433	304.121	335.548	125.086	169.113	98.0847	118.885	282.926	238.372	218.097	162.607	210.2	297.043	367.429	656.557	179.052	98.8923	143.391	301.229	110.246
	222.432	325.123	139.423	327.697	188.394	273.219	139.31	326.472	448.862	272.446	181.486	133.825	161.623	195.091	106.2	242.232	302.861	217.258	115.684	194.836	269.879	356.72	479.905	231.933	111.574	215.227	264.785	94.6667
	210.303	483.351	106.988	303.545	127.012	310.197	190.182	330.871	423.343	239.351	263.526	336.931	167.551	125.152	116.227	230.092	221.526	277.859	245.193	187.152	289.539	266.987	733.679	283.968	110.485	169.87	212.461	78.1228
	334.721	301.359	141.135	392.408	121.974	285.729	152.589	285.638	469.458	286.677	298.522	159.74	179.3	259.7	116.27	247.926	279.183	269.41	156.69	215.329	288.079	290.256	391.212	206.676	95.3231	145.711	261.611	117.367
	307.343	298.877	109.154	341.375	172.113	354.483	220.4	354.846	399.103	292.306	280.393	175.542	148.114	147.855	112.513	209.823	195.877	277.634	169.74	199.155	281.853	209.265	402.269	209.85	95.8788	168.443	249.344	100.671
	349.623	329.879	136.469	290.639	147.608	311.157	161.289	260.861	442.397	294.607	346.111	153.316	143.662	153.772	103.389	231.553	249.836	403.085	144.573	195.563	194.986	256.088	382.849	125.333	116.816	65.25	254.9	111.375
	274.029	375.554	143.13	336.231	170.164	295.225	205.494	276.391	487.323	229.566	256.382	147.764	147.587	87.15	102.289	288.351	234.014	254.026	125.421	225.932	313.044	336.43	385.462	172.652	113.857	119.948	251.906	89.6508
	246.466	610.323	129.895	378.958	183.043	210.6	180.273	589.773	538.316	250.367	312.967	85.0833	139.985	124.985	108.953	208.873	224.286	283.442	135.925	204.764	229.216	313.222	637.338	125.797	97.8438	281.933	281.984	107.257
	320.917	362.577	130.736	357.197	170.403	279.862	176.175	276.942	446.803	193.056	299.106	82.6757	155.826	118.385	99.55	204.041	317.947	216.255	206.772	286.628	269.657	370.878	452.487	115.333	93.3333	131.271	212.195	102.051
	335.554	426.313	96.1429	294.462	129.115	317.557	274.75	201.368	740.904	221.032	252.93	81.961	149.156	178.767	137.617	162.8	294.932	287.903	221.338	270.893	361.662	243.696	407.397	178.079	99.6329	59.3291	192.357	107.029
	355.153	352.986	149.652	277.913	128.213	368.397	181.345	286.842	476.967	236.459	249	101.743	155.306	105.276	110.343	252.015	241.887	236.206	224.852	191.913	322.397	336.552	430.641	278.59	104.078	123.862	224.473	111.316
	338.922	337.227	134.845	328.657	197.571	286.766	179.487	248.046	484.48	288.808	389.405	170.868	124.877	143.925	131.2	187.623	229.054	234.132	147.922	221.082	271.293	299.493	1245.63	227.426	89.5672	164.133	242.581	97.7353
	240.988	303.434	174.194	274.85	205.563	326.121	209.329	267.816	360.014	256.449	289.784	145.203	154.338	224.545	105.529	247.508	187.31	242.466	156.667	159.015	251.384	277.385	350.5	144.809	116.544	120.838	291.644	84.5513
	346.938	343.771	111.842	336.821	115.284	340.493	181.75	299.558	693.483	297.734	309.461	234.404	168.614	176.286	105.441	233.017	265.776	220.403	222.618	202.483	346.033	258.679	433.645	191.122	125.833	138.894	254.771	111.43
	67.8261	320.917	143.183	319.514	178.87	569.143	158.983	322.7	524.174	308.973	326.254	175.111	162.346	103.963	126.174	263.914	255.617	225.953	171.662	216.114	340.897	320.323	594.284	138.909	104.364	149.522	350.167	99.3729
	148.947	505.254	139.417	377.462	330.931	267.268	170.303	311.767	675.618	240.275	251.932	128.859	163.351	111.689	125.048	231.911	262.967	232.216	220.789	211.382	255.871	299.342	468.608	171.583	103.241	127.044	258.286	102.881
	105.676	294.693	147.218	348.26	157.306	187.891	157.605	321.886	689.179	191.969	375.657	120.408	181.952	79.6714	141.682	245.513	195.105	233.014	173.597	211.657	358.723	292.784	617.592	183.631	108.506	132.433	236.368	96.2532
	160.171	305.239	121.833	387.275	194.616	171.111	215.924	254.657	717.734	218.931	296.871	133.649	170.897	155.413	144.568	287.6	161.661	209.188	114.167	176.589	309.5	258.394	476.8	147.738	116.5	143.803	247.464	113.936
	133.276	506.386	127.945	356.25	186.8	361.456	188.356	283.754	463.026	282.431	267.424	102.189	142.347	134.037	107.537	188.959	294.529	274.789	97.3846	205.075	371.53	303.234	365.063	269.818	103.446	116.789	256.286	93.9091
	153.48	338.7	122.339	403.045	166.918	300.508	155.863	227.727	306.5	276.661	72.209	76.9211	162.343	111	117.613	205.707	209.038	236.321	203.688	229.232	295.94	287.159	198.947	219.125	108.232	126.343	232.029	93.5526
	142.261	329.795	111.35	373.643	149.936	343.254	174.436	279.875	713.5	246.308	165	130.623	93.7679	91.1408	90.2375	248.493	301.536	244.859	214.608	219.833	261.062	347.484	390.394	272.481	99.2949	124.413	304.053	117.194
	147.4	318.892	125.72	346.439	159.048	292.707	159.5	281.208	705.429	183.919	265.458	147.375	169.792	122.714	111.567	221.641	284.5	254.2	209.97	182.417	291.909	393.527	621.26	301.691	103.667	145.828	203.544	98.8
	136.553	496.971	162.273	322.849	133.438	300.59	174.212	280.719	316.608	215.362	166.889	127.513	162.671	163.393	102.645	192.347	208.1	253.319	140	199.567	265.662	355.667	481.457	94.7143	77.1077	99.3699	235.036	110.062
	163.227	331.632	118.526	351.833	186.389	321.811	203.125	337.816	795.946	249.113	314.785	147.194	134.182	131.307	114.605	227.438	255.104	240.232	132.7	203.771	363.431	365.838	487.352	176.659	103.987	226.379	223.595	116.425
	158.571	325.351	138.767	379.973	112.772	351.587	232.929	326.439	680.603	349.828	269.559	116.206	183.788	242.427	103.701	258.7	214.123	287.013	154.811	175.873	272.8	281.484	388.295	146.122	100.61	193.377	253.339	129.462
	171.683	329.773	139.405	372.247	129.597	398.882	273.792	303.95	611.696	318.441	251.821	65.403	142.382	125.361	108.141	204.268	257.583	268.592	245	266.829	283.966	274.632	606	179.595	101.551	93.15	232.197	109.753
	140.306	442.853	136.412	316.359	131.103	331.322	190.295	314.382	733.526	318.951	230.55	99.2241	149.072	135.467	106.641	234.941	229.933	224.606	191.541	231.145	328.141	322.244	520.508	177.623	120.282	122.558	247.313	115.203
	161.385	546.575	101.722	344.487	143.232	365.288	130	323.986	606.068	268.75	571.277	90.3492	143.367	114.61	114.014	224.343	205.617	226.829	135.209	208.541	369.194	406.813	460.316	188.293	97.9589	284.897	242.234	88.7541
	144.55	356.845	135.942	269.117	214.219	314.73	179.724	386.678	678.305	236.527	434.281	143.121	163.552	102.606	125.788	251.041	249.115	254.487	210.263	286.375	302.537	330.397	377	331.452	119.814	269.879	247.397	93
	159.318	245.162	113.459	268.521	387.273	287.964	163.717	183.618	545.107	284.709	197.447	78.1447	152.13	124.063	119.558	205.429	186.985	247.514	175	222.73	297.443	334.724	367.342	157.622	102	382.203	228.508	106.469
	133.014	367.485	126.934	315.42	146.761	429.974	172.482	286.813	605.063	231.026	298.885	97.9706	173.15	164.218	110.055	180.435	264.79	237.917	214.288	235.5	304.531	304.639	428.523	202.2	96.4872	207.677	219.595	93.1139
	134.091	255.266	135.114	383.447	185.87	408.154	152.553	305.26	676.671	317.154	249.347	100.117	121.393	252.611	130.175	206.013	336.196	138.256	212.429	206.81	263.393	321.056	437.254	165.338	91.6447	182.25	249.24	87.3
	172.286	548.711	147.354	364.111	296.386	377.892	188.734	263.924	725.313	238.625	181.608	102.209	161.281	131.345	132.557	204.371	214.012	332.585	208.232	260.192	278.397	308.038	421.274	201.431	112.232	141.845	261.208	88.931
	106.169	329.483	133.404	364.806	161.5	360.563	199.169	317.461	769.301	290.554	314.921	103.628	150.636	112.08	109.929	205.284	191.684	301.429	231.909	208.068	322.321	286.258	465.227	114.203	89.0519	291.475	213.362	110.897
	121.286	375.532	121.969	314.43	167.984	357.738	202.885	290.692	727.778	267.844	158.961	84.6418	175.887	152.224	123.244	242.028	213.804	259.071	191.667	189.529	299.013	336	584.765	244.281	108.868	259.959	271.681	112.232
	109.803	302.672	132.064	316.508	172.516	392.485	190.986	358.934	879.352	311.625	245.2	61.7059	123.228	216.9	115.712	233.625	235.155	248.557	115.775	223.958	365.672	385.181	299.597	165.642	103.013	173.176	281.667	103.063
	159.681	527.25	137.297	306.316	559.912	278.297	176.934	267.758	698.262	332.467	245.471	97.4531	152.267	238.634	120.339	217.308	212.566	192.189	92.7179	282.35	172.945	254.79	312.057	148.293	96.4925	86.8064	251.247	111.221
	201.051	339.056	111.844	296.211	619.78	325.205	198.078	342.061	475.618	329.867	248.216	87.7143	171.444	217.539	116.114	194.839	177.671	220.786	180.827	206.474	303.855	389.19	358.282	209.55	119.25	289.842	249.104	111.317
	120.561	274.444	119.316	312.797	775.169	294.617	174.014	255.074	721.151	262.241	255.013	83.9697	152.955	105.917	108.422	207.308	206.195	237.077	149.224	223.325	283.62	246.45	323.725	182.914	90.4861	193.958	238.282	93.0847
	109.954	241.233	148.967	290.661	714.368	272.48	152.845	312.794	747.105	313.847	66.6441	73.5167	151.377	174.9	105.317	200.288	209.107	250.18	207.892	181.274	250.214	285.026	249.027	313.324	117.25	171.114	252.625	109.075
	132.593	298.092	165.052	339.592	685.931	284.377	201.867	288.329	353.026	248.5	112.076	75.7463	158.31	147.458	120.732	217.584	155.681	226.131	174.684	238.938	193.513	283.516	349.113	187.738	102.769	221.219	226.905	82.4028
	152.903	325.319	138.227	320.333	822.803	312.171	163.414	261.77	754.322	302.034	226.042	89.193	110.234	170.43	126.19	198.606	258.4	164.579	200.828	264.437	386.269	287.803	329.044	411.247	109.714	143.105	297.792	97.7692
	101.526	331.197	116.456	297.817	570.895	343.987	185.649	274.571	761.392	201.171	245.5	41.95	163.295	172.672	111.859	247.364	247.065	219.127	117.831	220.359	389.968	295.966	507.438	119.075	102.926	312.966	202.623	110.975
	156.623	335.56	121.944	351.03	747.039	263.443	182.187	312.5	753.518	246.044	224.675	73.5	163.321	210.247	116.789	179.333	215.052	221.133	157.587	220.039	211.468	327.492	404.6	160.438	108.373	192.84	261.215	90.2985
	147.946	373.139	173.484	385.861	668.653	365.293	164.645	392.064	481.122	183.986	180.052	138.644	159.676	119.549	107.623	185.707	208.983	233.392	215.885	220.191	315.532	348.885	342	131.343	94.7833	249.927	213.853	87.6351
	166.926	311.615	134.984	318.772	511.157	391.228	135.118	236.692	608.861	279.177	264.744	68.4237	133.104	114.417	108.707	197.209	160.571	258.45	171.258	309.333	314.82	389.129	422.375	200.492	109.738	185.312	231.237	99.4412
	143.836	532.848	107.088	323.164	174.403	257.548	208.588	285.3	803.737	266.298	150.172	92.9048	136.533	96.0139	120.281	276.029	253.416	299.459	150.851	268.41	288.386	340.939	483.123	153.169	114.377	217.922	251.641	103.738
	108.386	469.067	125.784	318.889	771.018	389.87	208.608	295.2	690.441	444.087	240.125	143.544	157.897	123.906	123.6	228.513	242.155	232.257	211.656	227.716	284.282	304.274	267.861	163.338	110.039	78.3571	292.192	95.6087
	96.6849	372.38	121.633	303.912	575.103	378.25	192.627	294.329	570.658	305.632	366.625	198.984	169.025	167.159	109.214	212.397	230.939	299.91	165.515	239.214	350.304	311.92	335.115	167.069	101.117	95.0645	360.29	97.8806
	156.155	473.101	121.067	313.485	567.343	307.379	181.203	246.507	713.986	320.653	302.725	145.586	169.58	203.306	124.769	229.647	185.682	195.514	223.21	219.368	178.175	284.794	367.589	160.914	127.253	95.9783	258.757	114.753
	206.577	510.07	152.452	292.443	676	310.347	223.658	248.9	736.015	241.361	343.277	147.69	171.769	178.392	108.662	228.033	149.2	207.066	197.08	233.312	210.069	290.242	333.299	171.052	110.169	82.8356	222.908	111.219
	116.794	337	154.448	262.055	583.161	284.679	156.904	345.342	616.857	266.231	276.205	159.521	149.068	213.19	112.635	195.829	211.817	307.292	191.113	262.56	258.415	316.897	327.35	151.386	93.3276	193.477	241.741	89.875
	108.441	309.657	121.259	304.215	414.101	301.276	258.052	308.085	620.123	211.24	479.397	150.488	155.382	116.684	105.494	234.105	199.27	279.051	191.765	208.771	279.817	325.961	378.514	179.238	108.828	250.734	250.431	110.87
	156.97	298.831	139.026	257.5	618.108	291.09	147.324	308.508	343.078	404.357	336.567	154.279	166.017	96.5789	119.324	211.19	201.063	210.987	202.658	229.063	358.737	341.855	418.533	235.397	99.3	276.613	199.6	90.9821
	142.637	305.694	121.25	329.899	617.063	306.143	172.448	292.736	703.465	487.987	352.676	147.934	141.041	164.72	115.276	226.838	211.244	213.967	193.449	218.038	320.328	374.529	510.424	246.333	110.151	264.368	257.7	106.584
	129.984	392.558	131.208	300.938	552.042	351.905	145.821	273.038	651.152	283.636	201.333	159.038	148.932	195.407	92.4805	244.719	209.882	236.182	183.835	195.766	184.029	291.913	485.228	141.014	102.207	226.662	236.207	81.325
	129.923	401.017	122.678	353.837	227.585	330.118	163.318	349.522	725.444	518.935	367.718	131.891	181.033	140.082	86.0556	182.141	236.149	272.753	241.71	238.043	265.304	259.561	229.857	142.158	92.625	254.145	211.643	101.6
	123.283	318.583	129.603	276.869	637.261	321.145	167.039	273.324	655.224	364.475	272.786	155.118	240.087	125.304	94.8493	192.912	213.033	216.316	137.84	172.964	281.837	358.068	499.524	158.116	93.8077	222.014	268.474	95.0972
	112.246	294.579	133.78	320.723	636.37	302.111	135.292	305.181	830.23	304.045	374.89	156.633	138.548	94.5345	117.89	206.948	296.852	210.16	182.753	285.197	282.125	368.581	443.357	149.359	93.831	175.879	250.617	104.743
	102.132	608.412	139.487	301.548	475.701	305.582	138.781	234.893	633.661	166.581	236.239	133.518	143.139	224.208	113.541	203.707	253.734	162.289	139.31	161.717	308.393	274.049	458.519	244.046	101	291.557	278.404	92.2542
	145.838	268.297	132.828	250.722	667.426	272.065	113.603	260.146	791.727	338.881	260.81	161.171	163.862	109.085	123.4	230.755	210.878	215.219	105.921	252.662	294.138	290.564	456.917	335.282	168.036	176.219	260.57	122.618
	126.515	352.309	114.623	368.911	677.362	363.797	155.589	285.455	464.623	390.396	419.186	146.385	145.603	106.263	112.214	220.182	248.78	283.403	211.254	194.3	323.479	302.435	447.913	148.547	115.487	358.814	248.412	94.7826
	142.13	306.788	116.377	282.088	103.333	298.329	154.986	311.058	623.186	270.391	225.741	159.408	159.656	110.973	113.207	192.859	242.317	224.132	174.579	195.725	388.106	305.95	248.1	144.806	113.037	238.838	197.107	107.364
	131.391	294.234	117.671	281.983	553.658	371.526	155.364	323.53	636.833	159.4	271.653	140.45	151.623	39.8636	94.2361	209.508	237.105	211.949	168.942	246.322	379.113	295.948	293.595	122.817	113.831	348.474	266.333	94.075
	129.716	315.791	120.676	334.167	615.194	379	143.882	349.855	576.013	292.821	159.143	188.653	157.321	89.0968	110.085	184.352	131.057	149.321	193.617	260.671	280.474	353.797	268.09	217.711	121.377	191.91	225.413	86.7848
	176.577	352	122.554	339.528	219.821	289.452	166.667	257.507	657.776	425.417	388.333	152.07	169.929	85.8312	118.533	191.779	248.683	179.652	153.769	202.519	319.392	280.93	371.969	146.154	79	160.425	239.967	108.74
	163.089	498.821	133.892	373.025	215.114	257.786	277.117	313.103	818.419	306.583	349.696	164.39	157.242	111.176	111.797	219.962	239.776	196.73	178.189	199.788	205.23	185.23	256.178	156.837	97.6897	189.145	257.895	99.4737
	148.041	341.254	161.779	338.824	220.297	310.866	100.987	339.833	459.409	368.944	224.219	170.467	152.4	101.387	120.547	216.034	65.6441	177.831	204.962	253.197	324.038	333.767	602.562	169.386	237.643	374.208	276.484	106.091
	149.694	326.493	125.785	300.567	688.55	342.414	698.404	239.532	467.923	508.423	202.697	156.18	154.044	97.9467	105.621	205.707	240.833	125.068	225.133	237.203	293.987	281.053	506.491	167.625	192.239	274.44	275.321	131.242
	137.197	300.462	117.036	311.429	566.194	344.074	206.016	276.722	317	318.982	348.293	176.265	155.896	91.3276	111.089	216.368	164.893	188.628	167.679	271.281	321.19	295.533	565.5	248.211	167.643	259.254	225.448	102.884
	168.262	319.838	142.841	328.472	537.741	271.052	431.423	255.243	194.2	431.63	427.85	158.718	146.172	131.561	112.028	170.956	243.778	205.985	119.762	243.949	329.421	352.958	642.959	194.758	172.114	227.632	239.957	97.8939
	145.672	326.041	170.118	313.143	661.847	306.433	835.368	274.821	307.234	585.432	341.636	154.397	145.286	100.211	94.8649	203.541	232.253	183.079	192.935	258.295	305.284	253.718	413.875	259.111	161.409	122.825	239.215	105.013
	145.743	335.479	139.72	329.167	365.733	303.449	163.493	232.926	336.307	435.295	312.282	196.25	162.882	85.7342	114.064	182.836	261.105	237.418	235.792	248.192	317.571	270.647	368.922	207.23	111.851	289.917	225.649	112.731
	155.239	325.557	147.484	312.232	717.253	275.629	776.129	271.662	260.093	223.317	161.778	170.115	167.016	101.397	106.943	198.407	260.203	219.508	148.987	184.947	116.305	349.424	304.413	174.015	144.236	311.358	196.569	100.948
	124.44	325.247	144.18	317.234	339.176	341.079	165.267	270.542	169.667	291.667	239.688	163.313	158.303	107.775	141.983	191.556	228.397	152.987	107.667	234.075	150.853	362.59	323.827	249.518	169.468	183.069	237.731	111.534
	126.955	318.829	138.594	311.182	603.064	337.221	194.525	243.195	301.45	272.554	336.696	155.96	157.098	99.7838	116.161	195.234	219.375	173.814	190.279	203.088	354.84	297.923	380.986	198.203	166.923	179.368	256.649	101.909
	130.936	359.544	106.095	273.592	622.94	360.673	715.851	275.74	307.519	614.886	287.364	175.573	154.818	81.8143	108.848	239.887	222.797	232.078	216.611	201.538	182.623	369.703	544.016	249.817	240.533	255.309	395.209	127.929
	128.017	321.558	103.696	266.143	185.149	349.146	687.782	242.514	293.747	390.883	450.676	156.475	145.658	141.982	124.362	109.778	248.238	245.649	224.063	205.167	333.641	358.279	388.865	239.595	168.544	241.877	252.928	102.804
	148.164	296.423	159.768	289.082	243.162	300.451	177.036	590.566	335.203	417.462	400.52	153.317	137.817	125.787	108.097	343.368	226.192	265.347	191.681	198.184	183.154	243.382	302.155	146.667	185.045	225.507	212.797	104.913
	159.681	529.461	111.471	314.633	735.769	320.053	174.785	505.855	312.643	292.554	159.045	173.54	179.534	84.0135	113.23	252.583	224.862	133.206	159.662	194.531	210.424	250.959	582.934	224.75	149.446	293.264	343.136	94.5205
	126.719	544.646	123.385	515.089	198.016	279.957	588.986	645.513	288.523	384.891	340.833	256.155	146.333	110.694	100.356	200.379	263.403	190.513	132.203	207.899	196.441	226.676	94.1233	228.347	141.816	297.237	354.203	86.2154
	148.577	663.102	128.086	359.679	256.753	348.289	572.831	571.73	326.875	398.857	168.492	158.542	150.918	128.534	109.329	176.64	204.586	190.039	176.41	238.37	138.986	303.973	222.678	227.542	214.434	246.907	252.868	90.5256
	139.288	370.222	120.691	375.264	219.481	275.167	552.295	542.25	311.324	298.018	217.027	169.554	144.169	111	99.8154	162.207	223.75	69.1127	133.303	168.161	163.25	273.026	603.31	151.452	204.778	162.873	256.915	116.91
	146.862	327.987	157.75	366.563	257.585	321.529	238.208	600.386	347.246	174.404	228.175	168.173	146.766	91.5781	109.892	260.981	245.699	57.9811	153.234	206.114	256.983	294.638	404.329	242.056	174.573	264.667	327.525	106.259
	165.164	323.206	133.704	333.052	726.029	314.231	419.407	624.513	147.2	430.217	155.844	159.897	156.88	111.56	122.605	185.597	227.314	35.7018	267.468	196.385	194.188	306.262	263.04	233.554	181.966	218.969	240.823	115.459
	138.536	371.197	114.05	305.753	830.493	358.569	518.343	651	331.951	513.391	528.684	152.81	159.841	95.9688	115.467	238.984	254.753	50.7049	231.85	182.194	328.576	281.333	297.091	152.253	180.944	199.986	288.888	121.296
	139.405	298.224	91.7455	377.671	834.015	341.544	221.892	645.364	519.176	385	208.4	170.875	156.889	120.018	137.388	160.941	203.958	48.6936	188.47	272.672	289.164	279.649	489.392	246.772	218.64	209.579	251.782	94.0364
	129.646	589.244	162.592	322.772	728.405	295.649	172.791	650.627	318.871	631.667	242.763	145.443	144.244	111.985	115.615	222.448	182.22	60.8169	249.822	170.429	299.447	315.069	315.1	143.359	148.479	237.439	276.372	96.9878
	155.164	367.092	153.067	297.579	625.086	293.014	352.197	483.038	418.214	554.842	362.844	151.029	143.159	114.217	121.254	210.78	195.269	40.6508	230.685	231.127	311.346	323.851	293.776	181.239	158.534	211.339	340.58	95.5714
	167.269	354.203	197.731	324.35	781.171	336.672	557.514	628.667	329.424	410.62	356.295	162.197	176.125	98.1552	131.475	186.118	222.333	50.7119	238.847	196.662	386.474	311.587	417.908	145.167	173.848	269.69	328.018	93.9692
	115.102	348.639	147.65	477.513	733.314	308.519	624.867	612.351	253.616	425.382	344.322	151.418	155.938	123.733	121.21	214.266	228.192	49.8462	180.236	213.273	313.208	287.727	291.653	228.708	116.923	165.855	267.306	105.4
	98.1343	433.539	141.035	435.095	604.173	385.986	679.75	642.087	337.07	273.358	322.955	174.016	157.488	124.827	112.525	217.027	219.639	280.579	219	199.226	308.247	332.516	369.117	189.534	214.517	170.761	312.936	110.119
	154.262	327.623	137.565	403.968	205.887	307.4	702.711	563.95	346.145	482.831	244.163	169.621	144.355	112.757	131.579	155.254	198.192	94.9394	154.289	253.786	322.695	333.257	287.517	349.295	216.346	262.014	278.831	102.234
	141.123	402	139.071	402.623	819.557	381.515	179.071	557.647	343.58	481.455	363.105	165.516	133.367	111.662	125.707	197.526	239.731	59.8533	228.313	239.857	296.821	292.414	284.562	196.782	252.211	206.304	333.754	98.5132
	135.153	320.026	137.714	402.034	725.783	331.016	508.177	601.662	250.174	487.039	455.621	145.15	148.177	128.642	112.948	214.14	215.628	70.2239	236.212	202.145	288.797	288.942	416.256	193.951	136.068	178.667	321.4	101.9
	118.738	441.78	129.532	335.028	737.338	266.271	657.594	437.162	243.625	297.408	394.775	151.64	155.193	137.408	105.453	207.106	177.762	48.7763	238.833	199.162	360.088	313.481	329.125	130.125	207.65	200.121	209.924	98.7455
	132.638	284.03	542.027	434.672	762.014	307.587	418.829	456.776	360.897	311.159	530.97	142.149	163.047	105.123	109.288	268.051	275.196	47.6833	234.73	200.171	255.948	317.987	336.282	195.986	104.687	328.653	320.61	94.8293
	113.395	423.797	134.579	460.721	676.833	302.759	590.29	632.643	370.563	596.287	322.906	186.086	137.325	129.278	140.897	201.956	167.475	44.3088	252.731	212.764	332.211	256.788	513.551	194.969	248.013	143.553	356.577	100.397
	126.507	299.408	130.934	490.033	743.036	305.385	505.304	680.565	408.075	507.086	346.685	129.179	127.975	128.809	117.147	189.578	282.083	58.5846	216.63	193.967	241.917	249.449	488.984	165.116	186.79	192.208	203.758	99.6625
	130.721	322.208	358.122	451.153	710.094	306.838	589.364	504.534	379.526	405.776	400.339	166.208	135.576	95.9524	120.743	164	206.603	42.9455	170.362	230.701	177.712	306.492	427.696	247.449	220.654	240.897	134.816	118.886
	111.787	370.473	369.278	273.403	645.082	285.359	631.075	541.689	384.721	463.237	410.819	125.486	129.155	116.415	89.8971	194.692	245.486	71.7162	249.722	273.545	159.5	277.092	386.97	223.683	284.244	240.12	94.4833	97.6786
	120.481	331.277	461.125	430.671	633.086	323.911	398.923	435.151	412.247	471.148	482.623	146.589	157.628	99.0137	103.114	213.189	172.017	67.2857	258.319	211.435	176.237	235.113	494.15	187.5	215.359	138.671	260.351	106.269
	138.514	343.421	141.419	348.299	810.632	308.441	275.974	603	367.983	483.197	336.727	148.887	156.039	115.397	122.549	181.214	268	83.0886	234.423	223.071	353.736	384.595	358.935	163.6	214.894	246.397	211.644	103.451
	141.833	288.757	38.1791	397.367	678.974	341.486	789.37	597.121	379.274	380.732	208.549	150.135	160.263	114.6	90.8689	169.761	230.205	65.8358	217.2	179.075	279.628	257.169	384.603	117.662	168.307	138.656	229.833	111.469
	177.528	351.487	29.9831	336.667	672.273	347.134	194.123	556.322	339.097	636.268	381.922	175.594	143.797	103.731	110.8	192.469	228.577	219.886	158.127	210.518	259.284	299.859	327.444	119.7	250.055	177.123	236.175	100.036
	115.455	315.426	182.432	454.586	708.811	371.366	562.224	481.875	392.24	274.711	264.105	169.051	144.138	114.571	108.883	188.26	220.184	268.68	128.917	155.214	296.655	271.078	246.716	270.439	209.159	209.162	256.847	93.2647
	145.117	375.759	117.417	396.712	762.59	382.753	531.587	446.736	493.039	305.6	316.93	157.615	173.271	128.329	123.987	191.958	270.314	226.554	215.158	250.947	322.382	302.014	337.417	231.654	239.887	247.814	262.903	125.825
	163.348	319.551	123.613	494.882	746.017	296.304	730.873	574.017	462.753	487.134	228.667	168.806	162.1	155.552	123.156	204.902	265.551	192.48	210.355	237.84	338.149	338.867	460.544	147.936	240.8	251.672	242.444	110.382
	123.5	325.493	105.356	372.73	615.043	111.343	174.734	585.825	368.138	327.827	379.782	158.842	160.759	114.639	115.608	171.082	223.603	230.658	215.045	230.247	322.881	313.151	299.269	177.609	200.279	243.974	252.102	100.632
	135.853	302.153	173.049	507	810.95	340.306	578.132	509.372	419.767	519.125	396	173.333	148.822	99.8033	125.382	190	233.768	206.366	274.949	195.244	162.521	295.868	368.493	209	212.879	171.397	224.658	97.1842
	134.875	330.218	153.443	395.823	668.246	266.725	471.8	501.982	442.424	222.826	411.716	143.366	151.809	90.8676	126.727	187.08	268.684	145.192	250.723	261.147	336.984	262.239	283.154	203.77	187.476	143.718	218.922	91.1795
	227.815	561.162	140.727	440	729.3	272.429	219.062	564.853	328.561	216.358	559.274	150.121	150.684	162.8	114.382	187.822	207.158	152.586	239.38	203.636	310.868	280.479	337.461	226.221	266.768	180.681	206.043	98.1053
	141.897	545.543	140.41	437.456	669.125	351.145	380.43	466.321	500.722	251.324	394.125	165.554	139.31	84.1739	111.5	155.086	262.27	301.824	249.934	186.092	377.75	278.027	218.932	205.956	230.818	195.534	292.306	105.787
	127.948	466.074	461.267	383.778	702.364	372.382	517.681	473.313	613.821	258.268	284.152	175.948	167.972	118.514	106.141	180.671	333.147	228.342	213.211	223.7	297.113	313.877	338.62	230.862	211.964	186.696	268.744	100.078
	133.147	411.583	123.545	425.284	685.468	263	517.778	420.303	449.256	270.045	331.368	166.681	155.046	112.684	123.627	191.015	225.153	151.355	217.164	253.282	339.468	272.539	331.429	181.855	193.364	248.322	213.429	95.6753
	139.5	403	113.812	444.047	179.697	274.271	211.266	445.662	459.519	277.104	208.509	163.933	149.767	136.284	112.724	178.167	219.649	167.882	194.567	222.12	283.944	189.778	244.346	237.293	270.833	237.883	252.872	116.529
	133.232	526.066	329.468	377.974	748	322.754	520.297	496.45	472.482	248.317	161.676	193.933	135.221	104.453	137.884	167.974	243.088	253.078	215.603	192.4	304.662	329.368	449.227	196.778	267.453	213.872	315.163	111.403
	141.85	498.545	453.829	418.971	691.087	328.553	580.643	552.554	417.636	252.58	463.39	179.78	153.769	101.321	101.465	205.742	240.908	258.908	272.709	293.284	315.094	242.78	418.237	224.518	246.436	244.542	183.127	78.6462
	131.718	554.321	378.169	427.97	707.063	307.043	676.612	521.612	423.446	253.244	442.797	153.121	144.734	146.101	125.526	261.851	193.167	281.333	225.527	224.771	304.429	331.451	250.226	250.468	238.087	145.719	256.695	85.3538
	100.552	418.184	111.75	510.931	855.103	284.487	234.53	386.923	375.062	203.101	362.889	148.779	165.153	131.833	111.654	192.875	264.385	234.226	168.493	177.486	314.883	340.05	307.91	198.474	184.328	275.479	261.351	101.848
	148.566	534.729	377.177	345.474	772.825	282.362	655.618	591.257	396.622	254.115	381.456	169.104	125.595	113.948	118.776	190.315	196.653	277.207	251.3	208.308	300.275	255.875	418.138	217.709	133.391	185.182	241.139	93.1154
	170.829	555.684	479.153	416.342	682.219	380.288	493.214	380.051	512.9	241.116	475.357	162.667	152.9	106.882	112.722	158.87	225.416	206.483	224.3	172.133	351.375	288.618	522.156	188.833	212.431	242.416	236.028	120.346
	173.736	574.403	422.029	487.303	809.271	303.725	489.216	529.8	523.554	283.792	405.671	185.268	141.812	122.932	116.718	188.974	211.875	245.308	212.017	173.162	309.87	366.833	350.458	103.273	246.339	219.082	211.12	89.3913
	174.597	484.5	144.712	463.953	831.794	293.597	500.469	476.82	422.213	223.175	341.329	169.09	146.133	128.696	115.077	190.377	204.808	250.764	240.69	226.014	300.667	362.732	335.421	224.522	303.877	163.955	257.541	104.324
	154.274	525.962	422.257	299.306	629.217	338.65	304.333	607.307	483.439	292.397	473.509	159.953	180.131	121.535	107.86	175.299	186.113	237.592	227.186	229.808	229.947	335.136	299.4	221.901	193.785	217.054	310.557	108.486
	127.508	582.466	180.637	461.257	737.257	271.625	116.358	558.494	296.366	183.701	390.284	175.982	88.4366	112.945	104.804	169.789	189.061	215.803	247.273	162.974	322.981	326.528	262.282	146.917	222.742	203.756	268.109	74.3676
	178.935	516.362	381.052	416.123	498.988	369.105	168.145	628.288	637.984	226.25	563.221	180.909	146.867	105.485	114.158	179.405	206.429	247.3	131.23	200.896	325.493	345.759	324.823	144.661	227.195	210.222	229.063	102.644
	155.652	459.367	404.282	431.92	861.644	349.304	480.552	539.516	460.325	333.684	376.429	172.649	140.75	166.679	122.871	179.842	211.873	239.74	249.662	175.877	319.536	291.571	322.912	263.652	239.203	227.159	243.167	107.046
	126.271	631.308	468.403	382.75	180.273	302.563	248.557	632.044	528.962	242.325	285.375	152.625	138.195	101.658	111.565	166.547	214.408	211.621	234.483	216.185	327.806	295.614	377.724	274.985	195.62	146.365	268.958	111.817
	143.271	431.483	489.56	383.925	690.689	347.986	541.527	590.38	663.471	238.075	323.086	180.382	159.629	122.039	103.25	188.684	202.12	156.164	171.948	298.737	323.945	356.913	306.295	206.615	103.014	156.58	251.458	82.6892
	148.25	526.75	152.757	331.675	563.292	313.897	551.987	415.646	184.362	262.783	410.27	176.356	164.194	132.908	111.71	180.103	229.319	171.768	251.29	226.579	283.294	376.31	299.653	189.792	142.269	227.382	284.95	99.2895
	160.987	525.208	604.985	463.318	652.925	277.758	180.045	570.441	444.456	269.346	303.083	150.237	140.987	113.355	121.288	167.414	245.892	212.014	228.507	251.569	350.386	268.753	224.309	178.29	97.3134	168.901	300.926	104.379
	161.404	453.596	438.734	394.567	808.661	356.416	623.189	437.239	569.525	174.179	432.197	184.029	147.247	125.754	97.0299	200.121	79.1017	236.629	220.104	208.364	350.778	334.411	398.175	138.043	126.113	194.395	229.182	98.942
	155.194	520.891	420.513	359.597	459.1	325.298	650.857	447.302	704.025	199.712	368.224	269.368	175.418	108.15	110.345	162.922	171.637	256.808	262.672	215.897	313.325	309.559	357.821	215.377	151.359	229.212	255.638	100.418
	150.055	456.338	377.169	377.883	742.133	362.09	562.75	417.29	668.954	222.212	358	160.606	147.797	96.36	117.357	183.597	179.455	225	229.156	212.377	253.625	325.439	370.041	204.849	244.786	198.645	251.644	107.357
	148.014	601.654	479.392	398.088	780.115	323.985	301.982	450.25	595.835	260.189	353.348	157.3	147.564	92.5375	115.571	190.853	154.449	277.477	250.638	191.488	324.563	323.1	360.917	215.838	217.901	205.195	252.984	89.1846
	145.586	454	355.338	281.551	774.288	317.295	169.803	486.758	413.514	265.25	398.741	163.368	145.131	128.721	105.661	230.514	252.513	188.909	248.733	183.014	432.027	224.806	337.509	166.188	259.364	191.919	313.109	100.467
	127.233	493.076	446.141	385.468	605.964	280	534.065	508.678	687.959	278.721	421.464	151.2	157.532	99.4304	128.141	200.919	228.949	144.391	206.167	182.07	340.984	204.085	350.727	158.5	238.718	259.139	245.887	96.9821
	145.625	458.507	513.915	396.84	779.239	285.508	637.196	457.434	471.589	150.092	395.526	159.333	130.75	87.8088	111.882	165.5	194.462	252.153	210.258	201.143	250.853	363	318.179	197.103	266.36	162.403	320.58	107.612
	155.213	549.684	436.23	384.508	586.877	319.6	529.826	443.361	793.333	247.739	219.935	169.211	140.368	95.2985	115.149	163.884	189.688	243.068	229.014	166.862	328.547	355.688	342.817	158.413	223.182	147.397	255.613	103.466
	146.123	464.958	152.103	526.615	710.713	380.884	587.169	404.859	523.775	433.107	367.456	149.734	150.747	119.963	96.9875	181.462	137.016	199.463	244.6	204.865	311.177	293.743	358.7	164.729	229.764	223.686	213.6	110.641
	113.25	489.631	437.259	444.905	830.627	343.459	656.25	414.297	551.597	321.579	452.16	172.782	163.429	126.747	106.079	203.693	255.804	300.721	211.58	159.464	368.276	317.947	348.132	147.211	201.358	292.65	264.324	96.3898
	155.633	392.556	393.746	393.227	196.658	335.717	549.408	500.493	575.721	209.788	437.733	154.859	181.244	136.545	108.885	180.043	300.553	192.295	180.544	156.214	238.675	380.939	314.366	192.878	212.071	208.306	225.833	104.585
	115.508	457.645	368.328	411.982	736.095	310.814	567.867	308.5	924.587	274.418	472.948	141.652	178.68	132.508	117.275	171.087	196.082	172.221	257.122	243.788	309.145	372.328	406.5	169.625	236.842	127.617	226.538	99.0779
	131.136	518.017	431.469	322.889	624.672	266.62	589.164	505.051	548.521	286.763	534.286	134.545	131.129	145.385	109.308	177.697	192.696	161.679	203.507	226.247	303.959	379.895	289.185	159.804	122.75	193.224	196.308	123.696
	151.584	462.522	299.523	347.649	756.342	251.296	664.437	661.946	542.964	280.954	438.122	254.609	168.542	131.339	102.696	189.548	179.449	208.351	210.069	226.187	350.813	309.197	344.905	197.512	217.197	211.712	231.921	92.2239
	131.861	440.368	634.345	394.278	708.268	380.125	624.578	601.406	587.013	268.957	309.397	164.178	154.038	193.477	114.742	155.221	213.82	197.922	221.644	229.735	310.742	331.967	367.86	189.262	185.89	197.831	237.627	106.574
	133.814	565.03	146.017	306.707	653.881	295.309	742.157	402.436	562.403	185.343	404.763	179.944	137.316	198.683	113.881	163.325	195.213	204.764	248.688	213.962	209.231	329.162	210.342	165.684	279.896	183.842	222.895	84.4545
	123.987	508.615	393.423	429.571	836.794	293.542	624.237	541.776	558.543	189.842	311.21	161.825	166.1	124.872	107.369	168.169	200.508	184.038	263.795	213.329	311.833	378.239	453.862	175.982	210.351	237.844	252.544	94.5775
	116.644	507.28	363.945	351.408	197.284	330.691	689.986	560.836	607.789	211.288	366.597	202.217	154.221	111.846	113.895	180.583	173.211	255.842	147.581	196.759	323.203	340.671	404.353	190.761	224.167	201.708	384.703	96
	119.857	368.065	425.843	345.531	179.062	318.693	190.951	702.552	585.671	133.32	492.643	166.803	150.754	111.067	97.8113	177.783	209.28	201.483	233.333	171.897	335.69	373.282	307.475	334.5	254.179	196.447	267.414	93.5278
	118.723	485.475	417.037	488.792	601.405	272.291	536.816	538.236	839.976	129.311	505.519	152.111	148.967	152.25	136.462	190.5	216.847	189.266	209.211	220.947	345.35	319.561	401.209	227.971	232.333	166.962	245.5	93.141
	146.043	522.107	532.388	410.304	621.73	296.406	587.986	552.264	565.542	138.299	419.564	141.689	169.987	117.607	119.39	166.161	196.148	134.928	260.23	239.046	348.523	356.942	264.5	165.687	211.714	235.688	207.111	83.5932
	145.162	417.6	402.857	345.274	698.486	331.494	268.507	572.588	690.803	308.877	465.243	161.756	155.421	109.525	124.757	215.696	282.043	172.871	254.458	201.75	279.573	315.013	321.863	219.753	305.859	230.125	199.782	96.013
	137.025	417.904	393	369.266	512.479	342.55	378.288	518.524	766.38	167.045	524.775	148.541	151.224	112.389	108.082	158.714	203.986	195.887	185.323	187.761	316.241	369.233	349.559	150.792	282.606	200.582	214.836	97.3651
	128.93	550.246	505.732	458.549	734.564	331.754	447.614	507.403	605.836	141.625	333.466	180.683	149.866	105.453	93.4304	152.268	188.224	158.118	158.467	211.356	282.633	210.589	321.217	223.423	227.284	205.415	240.946	111.215
	138.823	466.857	118.553	364.754	594.448	325.73	467.403	427.027	579.415	188.434	350.75	145.566	142.775	102.063	91.589	211.185	221.512	178.507	242.462	223	367.27	287.707	245.235	145.439	312.826	119.256	191.851	110.167
	110.161	498.114	475.544	350.516	623.294	343.986	605.603	619.614	506.986	166.2	397.61	148.753	122.924	114.253	106.246	185.233	182.159	196.045	217.797	173.054	340.671	342.278	272.182	173.438	256.644	304.258	271.708	103.942
	135.38	446.171	392.941	376.899	651.93	310.23	576.325	573.131	527.492	227.623	534.692	161.363	162.516	114.316	115.109	174.333	175	225.186	200.683	200.5	355.412	358.171	262.082	200.447	247.156	223.479	253.686	107.282
	162.462	475.097	321.667	398.769	244.842	284.416	636.975	612.289	603.027	217.234	544.899	147.439	142.662	109.212	106.147	171.614	188.988	263.875	272.054	188.049	343.429	239.974	371.529	179.222	191.224	218.922	236.063	86.6667
	127.986	470.103	292.056	347.747	766.568	344.805	552.237	573.194	807.719	171.235	529.013	142.95	149	96.4615	103.833	159.688	219.058	168.367	336.732	151.195	209.461	397.118	296.57	196.368	149.759	203.039	272.824	114.262
	209.184	482.91	397.714	404.09	576.125	256.333	195.182	642.765	496.393	162.25	281.2	155.569	139.761	91.0375	109.986	170.848	175.763	163.88	232.293	260.655	398.09	355.652	394.208	175.338	169.26	120.59	191.4	102.134
	389.931	328.69	300.554	311.228	748.515	238.8	494.838	663.19	754.947	114.448	557.328	161.186	139.61	99.1905	109.226	163.468	103.338	159.738	261.149	217.622	311.28	391.2	315.193	140.544	195.567	232.101	318.443	115.304
	295.19	519.933	373.521	340.775	647.61	316.083	641.667	630.55	548.55	158.329	438.607	166	165.53	113.486	126.75	144.633	181.467	197.167	220.382	209.162	280.882	391.694	364.295	138.71	241.525	146.018	226.169	108.533
	365.564	459.656	392.571	454.865	740.379	350.982	542.841	687.741	620.523	148.974	279.962	148.436	150.667	92.3467	139.143	180.855	173.417	177.247	186.776	227.24	291.939	294.359	326.903	112.291	274.75	148.458	278.644	116.235
	210.493	481.525	431.382	395.12	623.609	303.065	320.756	630.758	610.844	69.75	517.795	155.985	270.466	86.4487	97.8772	162.554	297.253	165.574	217.656	183.368	260.678	363.159	378.195	139.883	232.195	139.143	272.949	100.972
	181.523	407.768	145.113	456.417	710.275	305.135	502.952	601.056	633.6	172.6	373.645	161.41	104.844	91.5857	126.173	187.086	153.949	152.338	294.321	204.459	208.268	318.41	474.017	190.905	248.479	216.232	199.351	96.7667
	172.213	571.242	378.475	418.853	790.082	314.161	584.711	394.558	619.289	188.421	249.606	151.986	179.412	108.833	122.608	185.257	271.612	190.339	272.679	189.91	304.238	363.286	309.164	139.947	254.453	167.906	205.705	105.281
	173.846	506.413	295.314	430.36	805.709	307.633	319.791	428.831	626.333	273.493	292.065	193.875	150.6	109.303	105.885	187.677	294.557	250.705	249.932	185.468	302.186	300.77	281.386	154.317	238.203	143.921	244.567	98.5
	368.737	491.828	378.793	342.159	154.135	315.935	632.333	633.271	542.573	179.227	538.847	133.757	152.28	110.318	119.053	171.479	252.073	244.716	244.328	217.652	307.574	327.013	262.35	124.387	156.553	167.686	299.493	105.854
	339.816	495.942	359.831	368.338	656.705	441.208	629.269	601.429	818.718	135.525	677.316	150.347	103.687	113.625	118.169	181.067	302.24	199.015	168.533	182.822	276.925	342.575	321.87	253.952	159.917	101.686	246.3	100.359
	354.351	495.558	218.982	362.526	667.81	262.141	601.487	578.73	721.851	117.855	476.31	154.571	105.015	116.692	116.191	172.612	215.35	175.033	250.121	244.027	203.222	344.745	410.044	153.883	462.729	124.578	242.167	90.0545
	133.367	555.139	320.457	304.222	657.595	272.618	619.721	597	761.746	217.417	575.167	178.286	109.554	107.367	95.1429	193.316	158.13	253.459	308.152	243.014	309.563	332.712	382.508	167.867	139.279	28.557	242.723	106.368
	165.089	482.81	253.234	370.247	127.986	310.179	657.667	484.104	570.838	211.431	614.288	163.275	106.419	104.75	117.123	201.292	43.76	196.036	206.652	201.957	320.169	323.776	325.273	146.883	268.329	93.9737	248.533	112.466
	142.9	488.053	457.567	343.826	591	213.255	336.338	607.859	708.95	122.641	582.157	172.606	144.535	91.7949	113.8	199.507	61.2297	215.961	212.406	236.772	299.737	309.554	436.973	150.231	139.305	107.154	236.416	105.797
	140.77	424.333	174.944	375.7	646.173	361.545	401.692	358.32	213.488	180.462	539.444	125.845	144.206	96.3333	115.507	220.758	56.459	213.836	196.883	203.709	279.286	347.458	304.661	133.035	219.017	114.944	227.474	90.5286
	307.197	546.291	122.101	338.483	580.897	287.662	232.29	615.178	294.568	114.817	609.338	179.493	157.8	90.1818	96.6282	185.385	143.159	225.739	236.709	200.167	288.769	382.873	377.164	172.587	404.931	106.322	212.135	86.7237
	120.526	503.574	209.776	375.649	623.384	318.235	607.983	581.242	142.329	123.956	288.741	160.246	158.538	110.948	120.367	167.449	256.622	201.141	255.234	233.074	187.986	231.934	402.903	172.319	205.208	321.169	187.033	101.034
	433.661	492.929	166.621	443.2	670.671	270.354	577.342	679.282	200.128	202.847	601.211	185.291	160.065	95.9016	112.108	211.375	149.208	224.1	207.143	212.481	287.721	240.983	353.455	153.217	234.105	303.429	230.267	113.894
	379.596	607.169	100.278	418.557	632.18	330.027	625.545	583.662	299.253	184.113	477.623	148.413	146.915	117.603	111.03	178.529	140.42	208.257	243.941	208.609	289.176	289.309	393.339	116.455	257.853	104.171	293.308	124.197
	187.193	529.96	199.419	347.675	681.636	378.551	514.184	709.958	236.807	162.795	591.62	132.512	163.217	113.565	126.259	192.247	282.931	267.013	211.363	212.754	314.179	376.145	376.757	166.276	270.591	276.515	260.317	90.6207
	137.4	479.473	213.22	383.108	730.141	391.152	722.763	584.649	310.418	179.487	385.554	239.86	172.25	95.5455	113.543	185.897	285.65	229.538	128.375	211.429	357.061	242.483	338.155	157.936	309.41	157.175	234.667	113.646
	142.033	570.359	102.145	384.897	712.045	259.41	760.465	720.32	216.703	154.382	391.825	175.661	156.579	110.128	131.415	216.344	340.842	174.81	258.513	175.361	329.638	252.411	388.844	148.768	247.388	157.835	313.987	81.5789
	413.923	400.129	96.7467	357.953	810.356	298.645	559.468	588.03	158.306	326.676	418.474	144.676	177.701	136.583	134.272	155.6	242.984	199.373	197.769	224.875	62.9275	465.861	339.239	166.816	225.316	334.696	231.732	100.776
	429.62	580.482	162.678	433.556	774.61	309.417	469.435	591.196	258.814	223.03	275.903	156.712	132.8	107.229	114.244	195.644	362.671	218.618	191.475	187.914	70.7183	352.925	298.828	126.536	144.455	366.742	249.544	100.508
	366.5	493.359	241.343	309.75	719.012	261	537.467	495.397	182.067	84.7049	504.417	149.788	178.05	97.8182	117.558	175.685	231.983	243.986	201.026	225.172	109.6	243.923	246.863	189.645	267.68	233.154	279.747	104.969
	398.203	547.514	149.959	401.482	656.81	354.605	518.894	612.159	207.208	215.147	666.103	174.534	149.766	103.635	118.821	173.6	354.434	226.074	295.785	239.383	102.433	283.2	398.4	121.528	242.957	100.241	265.934	94.8077
	524.638	545.397	192.613	315.962	564.494	305.238	227.475	522.138	165.037	237.514	461.829	179.779	135.122	116.066	107.638	213.015	144.097	212.121	284.946	212.421	351.595	218.136	435.649	141.595	304.907	167.974	203	103.239
	177.818	469.492	363.293	338.809	631.075	265.656	390.312	487.619	271.494	252.704	314.237	146.765	158.899	103.329	118.304	181.525	278.793	238.211	241.267	223.532	326.014	315.123	333.686	206.321	289.424	206.623	204.264	108.595
	428.721	417.538	323.027	333.039	522.65	356.806	550.811	580.55	457.896	194.395	434.937	185.59	147.514	103.56	115.85	155.403	346.282	199.468	252.537	210.844	296.972	309.103	302.817	244.459	298.779	337.447	225.466	99.3421
	290.42	524.474	145.971	307.366	604.662	283.484	210.696	482.538	368.621	189.158	432.324	149.301	249.836	107.746	128.438	171.538	211.857	229.169	253.603	211.297	264.325	343.1	365.16	138.855	309.247	151.301	201.743	79.9833
	376.345	508.433	333.735	309.957	634.162	250.036	270.086	537.279	330.932	168.927	484.642	160.797	156.81	96.3333	125.32	168.657	205.519	261.771	210.463	199.753	122.037	264.526	351.156	195.892	286.102	235.812	310.264	98.7432
	425.915	598.447	324.152	348	608.486	230.931	732.603	589.684	369.181	252.279	643.145	299.089	144.803	122.623	120.417	205.212	230.893	216.397	211.431	193.188	215.786	296.708	310.211	128.114	190.228	259.119	274.345	95.6528
	181.507	497.182	108.758	358.873	768.349	227.987	242.635	522.197	124.514	221.243	324.123	151.87	161.366	117.152	122.209	155.574	229.844	186.148	275.865	203.034	329.529	224.987	295.529	185.429	307.554	378.957	220.219	106.339
	300.462	447.321	117.172	346.9	740.063	282.247	541.908	543.412	344.25	121.714	444.7	157.303	136.812	119.017	123.9	185.944	226.31	171.413	232.949	149.508	305.013	236.548	346.679	198.183	283.015	293.042	263.348	98.9861
	153.567	495.711	267.897	320.494	695.6	285.462	436.585	588.125	199.789	249.273	654.672	150.097	133.214	131.234	107.101	186.3	313.027	175.103	251.282	174.355	338.768	285.378	409.933	215.145	288.114	688.792	246.986	111.301
	371.868	468.321	156.271	356.092	710.07	326.016	446.286	430.242	508.706	184.833	333.803	147.175	152.797	94.4688	91.7119	185.238	165.718	208.974	243.734	222.418	86.7945	354.787	323.653	237.775	245.828	180.8	268.425	85.6923
	374.193	544.345	124.113	299.368	767.671	348.559	609.099	556.449	353.269	230.234	517.508	148.818	171.132	115.725	127.908	193.169	237.705	242.222	245.103	232.218	111.792	349.888	455	177.84	303.39	313.145	250.104	100.284
	356.769	475.79	286.463	301.359	831.8	349.372	654.493	622.316	232.154	158.089	494.25	162.943	163.75	104.55	130.937	195.721	237.526	218.244	290.443	191.78	141.125	492.788	383.784	224.728	247.75	296.22	225.262	91.2639
	133.894	468.293	296.209	374.383	201.697	239.725	537.287	610.447	535.694	202.314	444.895	148.892	154.855	105.658	120.486	161.303	272.592	191.028	245.569	206.208	308.985	415.699	354.424	206.37	90.1449	269.152	253.594	100.892
	213.182	442.414	302.795	389.036	671.905	301.521	635.206	601.566	395.893	198.062	325.786	157.057	170.027	107.485	98.3478	174.133	188.333	235.573	226.632	188.533	312.145	362	306.076	230.534	98.6203	389.115	212.583	98.75
	275.474	518.117	131.365	384.675	787.632	266.318	245.842	611.919	286.897	232.373	543.325	165.934	165.6	125.923	117.319	238.96	258.237	227.571	245.857	201.484	296.043	410	302.446	201.543	291.55	339.987	250.567	117.733
	477.275	512.667	414.469	379.623	778.561	284.722	751.524	529.705	570.139	112.6	498.295	315.158	145.087	104.928	115.429	184.571	206.579	143.945	309.111	193.922	267.063	383.11	329.138	277.815	209.986	141.513	268.175	99.6538
	243.573	344.93	100.375	432.484	595.896	334.118	157.609	557.407	474.277	221.238	222.735	164.441	165.699	108.203	108.297	200.975	135.879	214.024	262.367	186.431	215.017	353.37	272.066	240.885	156.947	251.814	228.397	103.018
	254.053	507.733	96.8611	346.222	198.14	313.458	327.983	697.451	557.485	206.267	648.41	270.957	139.456	106.091	122.212	171.814	230.48	241.443	259.282	194.279	123.386	331.893	203.143	175.523	298.671	183.925	218.958	104.806
	443.667	351.27	94.2568	335.925	757.167	291.063	166.931	560.761	317.962	244.636	532.155	318.2	167.417	112.662	114.575	197	149.141	220.692	162.416	241.808	126.347	345.913	320.737	180.833	250.25	229.772	219.117	98.6567
	398.192	508.625	118.179	323.2	195.721	263.815	461.394	597.919	572.854	43.1515	279.348	296.759	145.76	93.5179	117.232	209	218.025	221.81	258.198	207.115	318.446	335.841	338.119	257.509	209.55	143.636	238.031	93.5811
	434.917	467.242	109.13	447.639	791.773	251.667	640.161	553.701	461.182	149.152	392.729	191.13	155.879	103.74	109.482	210.883	195.076	215.58	212.309	180.052	303.612	287.721	281.059	202.143	216.486	257.194	240.13	88.0536
	333.351	410.969	138.612	306.303	709.804	284.864	249.014	636.817	602.103	194.667	393.039	150.333	161.4	86.7538	129.133	177.95	116.323	242.154	322.671	194.441	269.872	313.744	412.973	199.616	115.861	222.917	234.092	99.3056
	129.256	443.846	122.224	332.311	732.691	265.911	483.735	644.679	149.448	170.418	476.929	175.044	134.227	109.1	127.086	165.853	222.592	206.78	385.169	217.813	101.289	247.73	415.582	211.724	119.949	193.444	218.297	94.925
	202.987	419.829	125.264	356.247	209.097	351.176	544.948	486.574	411.059	228.055	456.234	126.641	132.921	103.865	109.39	171.557	230.289	180.724	266.923	197.282	282.281	308.351	218.292	148.96	245.61	382.766	275	97.4416
	253.367	534.08	393.541	278.141	724.22	229	663.745	505.558	447.089	206.231	560.306	173.725	182.948	120.564	122.437	163.732	220.067	132.101	338.567	189.685	265.421	236.75	295.277	223.278	258.304	140.641	212.908	111.139
	157.119	408.983	144.688	275.358	629.058	373.113	251.111	702.229	235.515	209.642	645.725	275.419	156.109	116.026	141.491	162.118	304.814	266.574	312.382	190.125	319.055	335.092	364.296	172.706	287.443	367.672	233.486	114.357
	205.414	416.696	352.641	316.692	575.351	340.864	498.577	596.037	532.779	221.92	201.278	264.697	156.897	115.479	110.418	194.423	183.208	213.278	210.603	193.862	195.227	290.41	351.337	186.164	263.09	294.93	213.671	115.344
	195.197	358.913	168.831	271.881	567.275	248.696	575.247	475.75	538.97	282.289	354.59	162.4	173.843	127.76	118.643	189.32	199.231	188.746	231.875	185.903	270.596	347.083	396.441	166.712	273.184	327.453	215.8	96.0278
	74.8939	416.391	452.519	480.632	676.986	259.153	463.734	558.938	647.57	160.529	476.513	96.0556	154.013	109.967	107.586	190.947	225.6	197.571	239.03	200.918	349.224	356.473	293.205	210.605	127	208.393	263.194	112.288
	161.521	475.705	359.412	318.697	671.184	339.971	656.403	546.632	633.074	131.408	571.3	139.493	222.051	109.5	133.606	177.57	210.456	204.948	281.71	166.2	307.656	328.855	336.367	206.212	106.676	186.279	271	103.633
	215.59	321.394	466.145	326.779	423.042	288.863	764.232	532.316	624.552	165.405	411.119	81.1111	149.135	93.4754	133.943	179.891	204.408	211.607	255.534	187.421	315.474	318.614	320.4	239.414	332.246	221.083	279.299	108.764
	207.868	350.351	440.952	360.662	589.287	235.533	508.5	568.525	497.527	119.569	506.227	149.675	158.092	105.944	133.707	190.018	228.375	238.915	282.718	193.051	368.368	306.864	358.373	185.975	320.484	311.41	197.5	107.914
	260.125	607.974	196.169	312.423	746.703	305.754	590.345	584.92	602.138	205.897	372.743	148.25	153.986	143.662	125.203	199.151	238.205	227.418	276.737	224.108	204.787	326.482	287.263	179.9	224.388	228.076	287.033	97.9359
	194.136	486.364	485.474	323.792	233.42	231.525	576.433	643.114	154.936	186.643	234.776	163.5	163.378	104.354	92.1897	179.05	201.062	193.75	248.509	178.296	301.082	338.192	319.857	158.197	228.063	269.788	209.988	101.31
	136.632	482.45	454.346	273.688	640.083	133.068	351.741	476.783	462.85	220.81	566.768	153.397	159.487	130.931	141.444	169	227.486	176	230.342	186.254	303.194	311.589	370.962	158.455	102	225.637	249.625	98.9625
	200.824	530.623	141.351	310.959	532.222	317.949	439.017	356.278	750.449	208.266	609.808	151.064	171.821	107.417	113.128	160.14	298.657	195.421	190.206	187.487	352.537	300.147	176.783	121.561	99.4211	223.071	236.014	93.0897
	234.932	445.057	379.913	338.654	693.595	228.451	496.507	273.961	577.487	215.385	459.443	140.288	125.483	126.26	121.237	196.675	207.698	181.127	287.2	169.324	304.595	280.031	395.95	123.959	120.75	287.967	241.39	112.793
	164.25	478.829	512.778	379.443	153.644	330.592	553.736	338.247	487.769	239.714	454.507	153.323	158.675	107.944	136.194	186.965	154.677	200.493	225.68	193.307	145.75	292.171	405.623	122.342	104.262	282.919	224.164	113.62
	214.837	440.5	359.535	342.765	741.842	227.57	585.397	362.068	403.415	224.156	586.074	138.842	154.847	127.32	121.017	182.875	236.429	155.525	274.548	236.295	292.533	275.406	421.416	114.684	112.276	272.029	234.797	93.4079
	154.769	559.778	352.925	297.061	608.662	324.224	388.95	339.985	302.712	327.397	487.886	131.282	128.343	136.298	99.1972	151.508	278.615	144.062	172	170.203	76.3881	414.5	305.789	126.827	106.97	373.632	190.912	109.348
	184.564	420.299	426.55	309.985	213.105	290.881	439.946	272.5	429.814	239.675	675.61	165.543	154.159	189.822	106.623	189.82	289.556	129.754	166.074	191.087	162.443	348.136	305.712	113.389	103.136	217.859	229.058	93.8312
	241.313	448.929	494.179	314.712	611.747	289.155	573.59	303.13	485.07	218.461	494.828	170.613	162.569	148.119	125.377	192.973	192.232	216.322	239.101	184.526	161.462	337.277	308.264	117.846	109.569	304.153	261.367	103.938
	128.259	526.018	342.203	392.11	430.875	240.954	328.941	325.424	464.543	212.214	493.15	150.379	234.842	170.985	115.959	175.582	235.014	258.154	257.466	219.909	143.018	326.31	355.089	117.44	106.692	261.899	254.91	108.312
	189.667	331.348	418.164	329.308	723.968	330.276	492.347	194.708	680.448	210.324	559.597	195.974	134.517	112.757	108.032	155.984	259.037	151.768	215.618	201.784	313.139	318.274	252.367	103.844	106.535	255.429	259.103	117.582
	71.2	401.819	191.341	250.726	318.618	114.215	707.12	347.437	265.09	280.316	488.564	148.107	146.532	96.2375	117.94	166.075	210.571	184.143	277.8	226.618	216.733	236.778	342.769	134.72	119.23	259.493	256.387	106.044
	189.606	501.93	113.9	313.108	358.923	318.391	512.708	231.897	734.143	322.267	509.892	136.946	168.684	93.0429	129.221	167.351	215.787	180.052	254.828	187.385	295.324	298.338	202.892	126.441	100.6	366.693	223.256	92.8684
	196.563	500.384	136.299	322.446	657.833	279.831	297.638	265.689	688.5	243.333	560.218	164.051	140.614	100.297	127.322	158.923	239.557	200.045	289.675	170.853	331.886	288.113	272.264	112.014	103.187	251.839	244.189	106.446
	256.895	424.308	504.27	332.222	710.4	254.386	559.182	263.184	817.227	187.061	292.806	149.039	177.333	103.333	119.562	162.356	133.806	193.367	217.042	182.649	301.804	299.545	300.986	144.367	93.2466	264.636	235.233	133.949
	294.974	605.211	645.211	273.793	451.319	305.325	581.167	469.662	700.159	195.491	698.375	164.986	105.406	112.083	117.351	185.986	242.485	138.737	232.25	196.901	321.803	387.224	410.052	138.524	112.892	226.803	226.189	104.89
	234	500.39	525.158	327.075	698.709	323.2	533.563	413.667	915.6	202.388	544.215	143.93	156.051	123.292	113.577	156.095	269.687	174.25	246.587	171.037	291.211	400.969	248.53	254	135.872	283.8	197.159	90.9091
	326.05	572.537	208.627	302.099	636.351	357.913	642.589	345.071	599.123	194.698	646.737	131.129	160.661	83.4375	131.029	174.167	248.5	202.685	236.72	196.145	246.106	312.075	274.373	145.951	119.039	260.271	274.197	101.597
	349.317	469.631	451.852	298.032	741.794	276.407	562.026	388.982	583.888	276.013	631	151.086	144.667	111.354	106.938	156.034	323.521	179.377	244.25	195.167	314.034	322.419	314.611	248.443	120.882	602.325	194.09	88.7333
	205.746	500.493	191.542	382.986	619.518	312.803	311.72	394.39	698.693	270.329	623.918	162.443	145.515	97.3636	104.513	159.233	132.303	212.788	237.807	152.304	295.971	251.494	407.127	159.917	139.013	318.776	232.054	106.213
	300.76	513.135	448.897	368.586	702.443	312.984	654.036	228.303	820.492	218.066	598.938	144.137	140.962	118.795	112.262	204.808	248.703	182.437	248.453	189.235	292.117	298.969	384.563	231.519	102.734	181.937	211.256	92.0769
	209.273	451.394	579.797	282.013	561.662	283.014	600.846	337.263	785.32	291.297	562.58	152.541	153.889	115.985	124.07	173.378	149.947	171	254.338	184.541	265.853	270.397	261.945	308.768	103.951	232.705	240.375	104.114
	148.776	500.557	600.696	304.117	577.635	322.836	475.271	298.836	865.357	211.774	377.961	157.311	144.59	122.956	123.717	187.391	246.224	218.91	273.265	202.155	127.75	273.342	337.538	326.525	87.7821	223.911	248.792	107.87
	168.262	379.955	510.838	354.738	546.574	279.711	585.614	309.507	703.185	268.746	548.442	156.215	141.192	90.3684	108.658	178.308	221.064	176.259	223.039	178.05	198.795	280.649	390.712	161.372	81.3729	111.833	246.957	117.397
	129.844	432.423	469.642	295.462	485.649	274.29	564.101	285.289	890.101	183.328	261.547	183.179	163.671	98.3175	119.158	173.848	225.671	91.7077	264.338	222.069	285.519	246.013	274.652	284.59	109.438	334.672	237.723	93.8904
	133.313	350.781	510.672	300	458.958	352.1	662.641	340.786	565.354	281.696	547.588	148.014	165.931	104.649	131.259	189.373	249.982	158.909	273.364	182.284	280.86	305.917	422.733	136.244	95.1111	142.712	235.507	99.5574
	225.529	552.942	454.623	314.688	661.397	321.582	718.829	328.7	235.015	278.31	216.941	161.444	168.633	99.1806	109.762	160.279	188.315	241.029	192.13	195.883	338	312.938	342.362	290.525	97.9114	307.866	211.757	109.357
	136.55	451.269	415.759	347.863	657.622	290.704	690.76	298.549	876.662	190.097	349.766	141.362	117.789	102.444	119.75	177.169	282.153	278.643	275.693	190.507	280.281	293.924	335.403	288.07	97.7237	298.883	227.983	109.093
	170.506	558.721	366.885	313.833	693.86	280.066	576.203	334.889	696.5	203.915	372	136.421	165.27	109.582	98.7778	150.012	147.967	305.933	254.39	186.381	334.195	309.468	383.743	270.775	85.5128	290.783	170.333	79.5606
	185.141	320.357	486.753	285.853	709.667	283.643	276.349	329.466	235.595	233.712	395.203	177.879	157.438	114.5	125.648	165.587	216.06	166	216.936	231.026	291.786	407.421	373.971	300.55	112.463	184.357	258.232	96.4615
	134.492	598.05	360.816	438	742.207	261.514	650.813	267.566	715.129	243.063	383.044	138.27	151.362	116.609	135.85	200.281	135.392	226.55	197.486	225.681	294.129	378.458	414.068	316.103	95.913	247.5	228.55	96.4561
	122.5	489.813	402.016	324.241	432.482	254.114	639.063	258.623	275.875	224.569	241.339	151.91	151.351	106.833	115.488	160.482	234.75	305.087	235.493	176.254	316.054	312.584	364.69	294.753	154.033	247.116	260.063	97.5385
	133.522	436.029	194.333	232.068	655.359	298.308	401.684	332.828	526.182	146.089	760.593	154.59	161.267	110.23	126.333	155.525	261.324	232.9	216.086	222.3	309.482	254.237	305.095	209.829	96.9868	218.747	70.8816	108.222
	115.561	503.851	622.645	250.733	651.078	275.644	470.672	339.486	655.692	303.569	197.522	125.18	141.776	104.279	131.603	160.45	262.883	302.533	260.704	300.722	297.39	305.914	296.526	338.043	111.085	314.28	214.194	103.558
	183.714	551.887	659.342	311.284	698.9	313.649	636.09	296.596	993.875	96.5833	734.484	152.349	150.224	105.906	106.667	175.272	223.311	238.205	288.429	354.763	301.763	277.949	219.356	246.667	106.221	274.932	233.141	116.397
	186	427.446	318.127	303.219	214.775	372.487	590.05	288.425	814.193	215.072	435.063	206.429	156.592	96.3857	101.824	192.338	209.192	294.318	272.731	286.411	211.768	254.545	437.987	290.066	115.722	259.029	204.329	113.092
	144.654	589.911	329.919	292.304	193.234	379.231	665.7	325.909	679.977	277.026	431.782	132	159.182	113.677	116.934	162.609	244.385	246.95	253.321	191.835	286.342	351.185	237.744	276.533	106.039	211.435	180.329	95.2308
	142.837	338.6	449.581	352.295	597.643	221.482	531.638	355.388	675.603	306.759	382.507	162.078	149.347	131.277	124.615	167.054	265.435	256.288	228.272	182.654	197.613	218.304	258.485	203.406	108.189	228.803	166.087	97.359
	122.966	459.543	362.597	285.7	693.393	265.345	687.258	311.945	907.797	254.911	263.536	123.639	143.724	97.1833	115.611	192.183	212.542	303.179	286.37	184.435	351.947	248.373	400.621	284.361	108.766	185.778	223.931	118.423
	132.569	424.833	306.507	288.4	406.127	312.056	781.683	356.243	743.623	157.091	316.795	158.723	156.182	95.96	125.831	183.2	187.077	257.179	256.829	335.077	283.97	324.727	298.705	314.969	119.379	184.284	205.353	116.712
	154.297	537.48	525.615	302.582	572.62	278.926	504.893	281.594	621.421	211.821	384.552	176.621	158.439	117.779	131.747	179.233	209.448	220.747	116.227	292.029	281.25	329.026	332.855	250.444	105.481	260.517	238.538	113.696
	124.538	521.716	217.342	267.831	650.865	253.433	761.526	273.463	776.56	144.295	478.014	122.957	157.84	87.6	133.69	189.559	106.029	245.421	283.184	309.714	186.466	385.613	380.09	339.986	110.959	206.205	178.054	95.2597
	148.528	478.65	143.257	273.955	656.339	352.372	623.431	271.329	333.724	236.317	331.759	140.348	146.947	96.7581	101.408	156.141	249.689	263.847	285.158	220.961	352.567	320.784	290.618	256.19	110.926	192.466	61.0517	110.382
	161.427	465.6	389.782	409.31	645.372	230.658	373.662	255.591	633.375	171.1	391.529	156.935	155.986	99.4557	128	171.015	201.984	214.342	296.775	280.775	202.817	334.618	220.58	150.364	129.75	273.65	214.882	99.8
	157.656	512.449	384.448	343.629	667.276	283.789	351.871	285.262	729.154	270.039	234.342	161.806	193.149	93.725	138.724	171.475	294.038	206.922	295.974	256.368	361.045	344.818	315.359	252.324	122.6	205.818	210.342	103.09
	103.443	540.092	363	255.793	579.444	249.237	547.125	327.072	1591.67	169.744	486.861	144.242	139.649	106.145	129.186	164.618	228.806	229.014	208.303	391.95	320.653	330.759	288.742	284.542	102.414	249.25	203.379	115.164
	142.446	490.508	362.829	335.938	746.015	246.333	372.727	307.757	726	226.706	523.833	176.156	144.765	107.588	123.62	194.847	201.936	291.241	133.119	288.897	322.493	265.737	272.87	274.079	120.836	144.517	199	94.7671
	120.309	469.973	391.563	301.731	495.304	288.859	708.985	207.636	621.625	310.283	177.877	137.475	146.161	75.9865	122.364	197.076	157.639	249.123	311.507	398.741	347.225	290.254	237.179	264.839	104.333	284.48	201.418	88.7067
	165.607	471.778	379.574	501.19	561.258	274.187	672.957	336.724	846.56	306.817	497.462	148.618	140.953	99.3378	135.038	168.584	248.013	218.968	292.42	289.344	317.662	290.592	288.492	268	96.6081	242.333	255.2	101.115
	120.171	482.391	500.159	309.141	656.086	225.432	543.917	305	737.987	256.246	502.353	180.708	146.081	102.395	121.934	178.899	206.841	199.096	270.408	269.638	284.724	270.57	320.7	146.393	183.558	300.195	209.725	92.8
	102.413	428.606	255.107	346.115	809.25	278.869	588.549	221.179	501.485	148.744	515.787	177.267	187.817	98.6316	133.246	161.684	102.487	258.962	254.147	292.545	273.714	387.613	325.882	229.8	123.697	242.348	191.42	96.4
	130.42	474.169	306.92	268.667	530.727	245.397	621.275	291.074	768.046	194.413	355.063	191.211	144.211	95.7931	114.42	178.485	160.085	192.606	281.355	197.083	187.102	379.351	310.8	318.757	135.815	297.333	222.629	91.7463
	143.724	493.577	517.936	458.707	459.558	296.032	461.75	322.307	488.172	214.875	361.302	126.458	151.986	95.1029	123.54	159.7	184.641	192.188	299.518	179.621	300.187	292.63	287.403	275.738	110.577	238.076	200.526	92.9474
	146.851	542.377	417.662	290.636	409.161	274.532	225.408	303.114	733.853	231.656	400.169	150.571	158.782	111.074	133.707	163.092	184.5	215.155	232.92	328.313	305.385	322.273	288.8	280.458	85.8814	227.944	213.386	98.24
	170.214	487.397	410.394	244.329	264.164	270.734	602.128	321.618	517.026	215.59	439.554	129.987	152.297	137.452	139.188	177.833	206.407	300.04	250.922	190.097	322.169	309.018	351.908	256.463	166.313	230.362	212.471	107.686
	133.676	474.848	474.594	254.529	374.886	269.949	167.538	369.761	563.625	176.231	334.747	153.75	138.6	108.8	124.264	177.493	166.818	258.765	235.424	179.217	282.895	339.625	283.966	229.038	133.324	178.681	70.9118	94.1774
	105	500.658	457.6	277.875	562.052	279.357	399.766	235.438	678.842	169.456	188.043	141.329	148.379	91.5672	117.103	174.671	197.893	226.289	269.5	277.172	334.778	326.089	370.227	274.982	134.164	211.698	263.379	111.963
	134.914	531.909	99.4127	311.317	641.508	380.831	327.921	293.339	245.782	292.833	225	135.571	155.638	120.333	131.247	174.605	242.954	209.621	238.206	228	35.9167	354.492	272.967	227.533	132.35	147.026	196.231	104.083
	96.7647	409.13	96.8657	254.294	610	409.311	537.556	331.735	853.531	303.947	308.872	167.595	164.378	112.577	131.716	176.05	276.522	219.089	154.229	271.806	327.541	404.908	349.298	251.8	141.513	269.215	207.875	88.2923
	160.292	495.729	101.473	385.515	471.586	355.603	562.921	274.322	899.357	292.639	430.782	169.262	158.246	112.616	129.467	174.375	183.75	210.343	167.013	334	283.411	325.521	330.811	194.4	118.088	214.198	216.038	109.574
	133.655	624.311	90.6	304.655	500.656	155.85	637.415	298.788	658.317	286.358	353.176	115.525	136.737	82.7568	102.786	204.582	196.266	243.179	235.768	284.592	262.172	334.597	361.493	229.567	104.164	244.575	252.986	99.7015
	137.719	478.889	101.525	213.069	601.947	158.708	711.266	284.387	739.092	152.282	348.896	132.532	136.295	109.813	108.969	160.935	182.936	254.389	209.808	276.392	267.303	315.75	258.429	303.012	117.174	243.6	189.553	89.7778
	137.81	531.975	100.289	307.261	172.329	110.653	570.554	296.848	392.529	130.276	395.565	165.757	139.882	123.309	121.833	197.453	241.203	273.085	269.884	262.949	373.638	239.75	334.203	241.342	131.603	239.472	275.538	106.068
	150.167	434.81	96.5769	292.487	484.588	209.942	312.301	314.851	546.61	200.441	575.225	158.455	162.075	104.887	136.959	195.013	223.09	168.679	290.263	301.753	297.329	243.041	222.385	231.015	100.132	253.27	243.415	99.2625
	120.625	585.797	102.76	308.463	242.179	107.593	238.556	334.643	415.362	268.909	261.862	151.761	172.094	109.526	122.384	165.424	278.733	222.78	244.346	315.879	292.25	340	254.569	214.158	103.091	193.377	261.338	106.014
	134.865	496.608	93.9265	291.403	187.171	162.367	296.846	310.684	962.434	349.371	312.136	130.117	166.329	94.9868	118.356	176.904	245.525	253.474	291.87	227.129	298.243	413.797	377.034	217.09	136.7	271.052	228.722	103.714
	151.594	506.371	108.424	263.417	513.388	159.125	293.029	246.667	748.137	291.737	338.479	157.741	133.474	96.924	134.507	256.636	155.169	216.143	251.893	301.13	198.516	207.486	358.333	267.608	126.711	248.373	222.349	95.7375
	150.865	416.189	119.941	292.563	316.279	128.459	627.696	393.193	708.983	280.816	312.436	134.959	136.571	93.3016	120.167	209.432	285.379	234.047	153.214	295.92	296.982	235.424	314.895	130.975	104.851	255.39	186.804	106.079
	106.739	407.685	129.971	307.015	297.093	161.375	486.649	284.203	838.329	132.4	181.697	151.55	147.097	115.69	115.519	202.679	229.097	236.706	194.767	239.731	288.159	448.85	238.554	133.672	110.421	263.957	208.4	94.3973
	110.563	440.771	104.07	226.778	167.875	223.542	303.171	277.973	765.937	200.234	196.536	151.688	155.903	117.289	118.469	180.25	238.58	252.197	278.982	267.237	272.449	205.283	334.015	226.355	96.8734	175.425	217.63	132.257
	135.406	483.037	111	248.547	276.293	158.569	659.111	280.455	932.211	229.39	403.561	148.78	149.304	128.351	118.394	204.346	250.841	202.405	233.321	320.321	294.154	427.442	305.577	218.897	122.379	161.411	242.548	109.013
	139.671	384.045	109.486	235.974	341.571	97.3194	592.746	530.757	945.102	251.106	249.613	140.55	160.759	112.423	123.863	207.028	297.103	233.079	208.761	228.563	319.654	443.652	306.866	241.901	117.892	201.028	220.508	109.866
	134.788	494.721	106.203	297.961	443.794	148.986	150.526	608.436	249.691	202.851	627.667	162.534	146.685	96.8033	118.622	188.697	188.928	175.754	265.95	219.203	300.538	374.509	386.286	268.967	128	231.295	239.015	112.115
	138.119	706.194	109.513	268.045	430.657	158.171	233.597	474.625	899.435	135.627	492.134	138.676	138.096	124.079	117.441	208.031	242.961	183.632	217.667	309.169	279.909	377.782	353.545	240.013	113.055	219.947	241.697	87.2698
	127.895	411.696	120.672	296.844	475.48	133.648	251.478	484.953	291.318	337.473	352.559	135.648	162.5	112.328	116.759	179.731	128.623	308.557	340.738	295.329	280.197	310.247	302.13	179.293	141.182	236.422	282.443	118.91
	143.217	507.418	116.192	405.103	402.506	298.275	429.867	515.234	687.944	351.768	422.513	176.114	158.276	101.075	128.536	205.466	151.575	196.387	263.492	274.384	355.732	347.154	230.81	221.153	110.457	280.828	210.615	89.72
	152.349	520.619	106.171	212.2	458.044	39.2055	189.769	468.475	904.102	349.324	517.152	168.987	140.62	100.576	114.39	151.233	237.378	263.577	338.273	265.934	308.809	334.553	256.716	237.958	198.113	260	267.441	116.317
	158.072	311.208	125.131	234.571	439.092	265.902	355.538	549.338	871.076	123.26	588.295	165.522	164.969	115.286	122.418	167.781	240	230.152	180	186.662	314.897	381.784	279.971	228.969	95.5658	330.268	230.85	105.842
	133.108	483.984	96.6338	271.26	720.507	344.871	380.344	479.95	782.431	197.16	303.819	165.857	122.983	101.768	131.517	189.728	240.101	187.039	231.206	222.408	293.173	309.459	237.472	207.793	114.129	119.676	234.699	110.422
	152.439	445.474	120.983	273.031	317.578	355.492	414.603	463.426	644.864	339.013	437.973	135.595	166.299	96.7846	108.437	194.949	214.311	221.19	236.5	248.536	344.135	290	304.625	146.957	103.167	249.77	246.418	114.105
	174.407	484.471	105.711	269.75	489.475	136.394	402.643	471.061	662.89	128.714	394.392	115.946	146.948	118.938	131.845	203.649	241.686	212.953	301.333	224.353	333.308	385.974	355.507	267.354	151.191	240.95	240.231	113.82
	125.912	532.083	98.4068	281.829	494.731	140.788	338.717	400.361	603.458	274.364	439.985	178.051	148.283	98.5818	138.645	182.625	166.945	226.484	221.259	270.043	60.619	344.93	359.257	164.637	134.983	107.738	201.118	112.948
	145.159	431.278	120.492	260.652	226.173	208.525	323.018	573.442	785.676	243.212	437.612	142.883	145.488	115.282	115.264	187.338	188.556	215.151	306.592	309.271	401.695	228.539	296.117	193.5	150.276	50.6377	275.897	95.8167
	145.898	506.222	126.638	233.211	207.718	121.107	353.055	400.311	690.922	185.179	326.618	99.859	136.836	105.068	109.512	199.632	160.568	219.518	243.365	280.2	249.958	274.538	268.25	221.375	151.131	301.471	245.875	97.2807
	114.345	528.813	99.1636	356.562	393.436	72.6923	474.905	627.556	772.354	303.354	455.662	99.48	139.388	104.441	132.03	185.473	148.913	226.322	247.379	269.191	286.766	379.154	275.155	196.897	115.051	303.385	195.679	111.182
	115.052	483.044	114.018	243.077	693.785	330.324	298.662	605.028	777.385	181.441	333.658	130.8	159.442	89.4429	117.556	155.468	231.211	199.959	255.182	253.947	298.662	245.359	348.697	210.557	123.851	161.431	209.881	121.451
	159.366	566.634	97.7703	253.357	341.236	274.712	364.725	490	737.583	344.305	505.771	160.756	137.444	101.776	108.853	192.929	212.236	179.557	264.509	192.151	282.573	204.217	288.366	258.338	122.759	188.047	247.263	102.716
	173.597	465.583	119	299.038	696.964	297.778	568.41	488.259	575.167	222.781	216.559	146.556	172.236	92.75	104.383	213.224	189.925	234.513	299.092	261.671	172.662	326.397	301.033	136	117.431	180.574	228.424	111.57
	132.636	519.803	115.863	269.313	464.312	287.962	354.714	427.429	430.149	304.721	173.897	134.986	151.896	82.2603	87.2714	181.87	268.895	234.592	284.017	215.114	265.4	308.13	395.421	172.268	105.656	306.102	223.914	120.221
	158.212	476.086	109.729	278.864	303.954	325.667	136.769	426.357	606.732	263.158	447.194	101.458	154.078	103.767	113.192	209.275	217.372	195.825	287.75	341.292	319.592	240.216	348.938	203.811	121.766	114.769	261.947	81.7089
	148.727	452.262	115.39	268.103	419.105	332.051	161.32	455.013	764.128	198.015	454.486	116.191	147.595	103.536	107.301	163.828	213.152	232.403	304.838	302.339	209.029	381.75	277.23	190.026	98.2785	228.312	219.982	107
	195.117	328.985	111.974	220.985	479.41	275.239	390.338	481.603	756.735	130.877	463.3	157.468	137.76	117.487	129.036	196.433	195.357	173.85	283.776	192.455	274.656	321.062	319.174	192.958	120.461	195.298	228.53	96.1613
	97.4125	450.922	99.8684	291.431	433.795	291.662	539.219	494.718	671.732	273.325	466.962	151.56	172.323	92.0435	119.172	195.61	215.884	206	289.508	310.62	259.625	457.835	284.2	206.347	131.235	242.731	226	108.017
	124.289	468.603	104.3	231.89	391.797	278.594	413.231	515.5	617.192	195.905	356.657	131.622	143.234	98.0789	102.039	192.235	165.884	204.72	287	214.694	385.448	435.42	303	197.946	103.071	233.553	250	114.242
	150.309	544.64	128.725	248.733	416.508	265.062	467.121	562.29	670.56	127.387	417.179	162.527	173.074	106.515	102.478	165.727	228.68	206.673	303.167	176.821	288.4	297.982	296.841	240.596	127.764	226.75	236.569	90.4156
	142.161	487.242	114.421	248.844	390.063	208.435	490.873	676.295	586.762	273.5	485.761	146.636	150.16	102.018	135.743	233.944	200.373	231.529	229.584	293.408	242.957	310.947	291.031	139.347	130.439	114.367	229.528	98.3889
	137.203	506.139	122.093	250.844	175.684	306.292	574.842	516.577	698.872	282.594	525.234	152.55	162.491	100.167	114.029	185.297	224.418	200.074	283.793	271.043	258.71	283.586	257.507	128.164	106.723	298.056	227.382	91.4533
	128.072	476.325	127.803	329.797	474.621	263.425	549.403	632.823	746.949	289.071	482.912	120.205	143.785	103.84	115.05	175.286	218.579	188.779	330.31	198.289	349.232	363.855	368.101	94.3377	98.2154	207.708	232.446	104.224
	107.974	422.583	95.9643	264.486	690.629	248.25	574.724	522.346	742.839	239.7	422.772	144.571	134.147	102.597	112.519	171.581	186.358	205.974	323.855	155.513	291.623	348.767	318.554	228.672	118.268	208.38	249.538	90.4875
	128.403	497.479	117.92	267.59	304.2	262.296	510.258	405.818	654.567	212.93	493.324	139.431	147.5	101.816	142.154	165.618	234.975	199.931	200.618	220.77	316.473	307.862	359.761	281.803	113.506	68.4146	277.635	116.761
	131.193	472.041	138.309	256.737	564.563	280.515	602.699	533.971	475.557	293.93	400.684	103.282	147.36	109.422	114.562	188.303	258.215	125	288.098	301.743	273.206	394.121	318.5	277.652	94.7308	33.5294	267.385	117.831
	150.086	481.466	93.0923	239.652	205.076	356.356	181.986	615.605	476.038	380.21	450.064	145.8	154.382	103.769	99.339	195.355	230.975	192.727	173.588	292.446	264.068	354.903	267.587	277.058	104.444	139.671	254.571	91.2239
	196.143	444.917	112.221	256.768	205.5	289.538	318.185	542.056	643.864	346.618	409.351	109.847	152.439	106.792	106.536	173.649	209.518	269.029	277.469	220.568	250.224	254.057	363.241	108.5	103.324	140.371	220.936	104.87
	143.973	343.205	102.026	231.145	425.914	241.418	328.563	624.271	652.447	155.96	366.48	89.0541	158.193	95.6447	113.922	200.5	107.625	183.818	286.345	298.888	270.372	403.394	218.263	218.188	130.145	123.844	221.754	120.261
	156	482.362	125.118	276.338	337.731	294.229	141.508	259.746	606.432	253.382	452.329	114.606	142.718	110.424	126.369	174.625	231.723	210.344	311.189	161.568	340.13	241.915	336.747	216.647	131.627	119.077	247.329	101.246
	142.533	291.125	93.7747	237.766	229.262	277.506	214.411	589.747	765.316	420.535	375.079	131	148.089	111.373	124.427	189.117	189.141	173.185	270.556	190.154	311.702	361.661	297.934	383.136	128.52	123.569	182.086	86.9688
	163.233	317.5	117.318	318.543	387.463	266.4	438.957	563.684	633.712	293.456	229.895	116.595	125	106.887	123.189	176.577	216.429	241.772	271.593	344.915	301.316	388.39	293.143	259.403	114.5	107.649	220.787	112.81
	183.526	229.986	113.444	431.577	552.535	301.274	355.047	486.247	627.756	320.225	210.652	147.354	145.055	121.278	106.857	179.531	222.75	194.577	227.379	202.228	341.924	203.418	417.5	311.018	99.4167	104.667	241.72	99.55
	146.545	299.014	90.3846	371.8	278.675	348.921	298.185	534.735	784.107	434.638	212.364	102.545	138.576	102.08	116.6	160.644	133.359	209.393	264.879	231.242	287.117	359.11	389.117	124.421	126.8	128.042	228.928	100.587
	134.206	315.123	106.338	351.478	354.089	269.051	431.197	523.153	684.576	501.721	339.316	115.818	139.672	118.899	143.775	161.395	216.608	199.2	207.475	173.286	265.659	355.716	517.321	268.915	113.152	332.906	247.455	104.435
	132.887	279.275	102.519	343.19	187.222	182.231	256.293	472.631	869.216	286.051	258.377	121.441	121	124.367	112.075	189.063	202.485	194.028	199.527	168.448	268.303	332.109	519.361	273.172	98.3281	98.975	232.195	67.5342
	124.446	260.108	101.886	401.829	565.767	194.563	345.304	450.127	793.221	511.055	248.347	134.293	163.541	96.5172	113.279	178.134	238.513	213.364	297.69	231.368	257.167	382.197	344.329	180.603	110.21	133	262.29	108.649
	117.316	245.918	100.316	303.469	466.3	281.592	502.836	475.339	722.152	434.266	193.441	170.224	180.697	96.443	122.643	165.902	197.431	198.955	222.704	232.231	284.541	343.365	280.406	271.833	93.4853	115.183	209.701	119.855
	129.515	267	145.783	347.359	476.254	241.836	273.017	400.482	772.145	263.316	188.422	65.9577	136.863	107.842	134.883	178.219	201.647	335.936	221.545	268.286	302.429	348.053	306.169	161.104	126.614	122.406	220.895	97.7119
	147.338	236.986	110.859	492.412	667.407	313.69	499.9	482.959	954.394	312.714	399.513	79.84	147.574	114.275	134.414	183.968	188.569	186.333	214.243	248.29	220.658	333.8	313.43	145.187	123.828	88.9865	259.169	112.348
	153	244.188	112.15	352.658	339.271	267.814	147.041	567.722	743.431	599.595	576.949	109.033	158.443	103.521	101.455	178.355	230.657	212.231	165.726	256.539	306.071	315.934	301.619	241.747	107.771	217.75	223.086	99.05
	134.37	250.096	140.606	330.836	465.246	261.243	416.5	457.081	840.274	130.865	503.357	122.425	160.017	119.207	132.109	401.358	235.257	180.087	300.533	250.194	323.836	339.228	270.636	212.947	126.39	247.484	241.797	108.732
	127.966	280.765	116.877	371.744	479.921	272.661	362.971	458.611	725.8	170.608	319.297	119.091	135.579	96.5972	118.754	197.557	243.75	173	303.158	188.946	310.983	382.623	403.221	305.386	120.813	245.606	229.328	103.881
	130.955	282.586	111.597	396.539	572.957	309.517	569.639	513.045	637.354	263.901	436.406	134.603	234.054	96.5949	101.287	151.5	227.184	164.86	244.727	223.591	262.961	444.219	237.967	242.925	101.961	173.638	290.647	101.4
	128.746	241.548	109.636	288.164	634.564	327.324	658.473	510.212	685.133	194.928	480.211	170.623	169.429	100.739	114.881	188.355	219.203	200.052	262.207	235.541	320.082	360.408	1826.44	222.763	105.177	184.707	218.55	94.2152
	182.417	239.243	97.2807	368.397	667.803	215.438	471.176	446.3	786.431	156.729	523.872	125.633	177.759	116.76	118.932	164.719	196.041	231.128	310.25	232.409	312.568	344.231	247.31	131.781	132.405	106.947	231.803	98.8333
	142.054	282.113	108.569	280.758	411.611	298.597	552.195	383.282	466.081	47.4	546.339	124.105	134.576	113.1	106.455	198.042	224.467	120.369	246.038	273.188	259.726	303.672	309.731	266.228	103.59	221.667	239.9	97.6491
	95.7	250.323	92.9868	355.949	467.688	228.542	598.35	533.195	461.688	232.529	375.507	120.758	161.919	93.3462	120.361	160.671	151.732	362.164	284.093	227.539	274.152	318.538	284.232	207.617	102.718	344.385	236.16	113.288
	149.745	301.03	103.318	426.59	304.744	258.696	292.6	517.218	964.333	141.758	426.603	139.955	151.74	99.3077	117.053	171.771	217.589	80.3768	220.345	225.38	67.0333	318.228	288.333	279.568	99.1125	223.539	238.619	110.681
	105.068	259.338	101.439	336.774	702.404	262.732	492.625	364.853	765.291	189.727	459.924	109.135	125.956	102.079	90.7286	188.234	161.234	339.27	246.41	198.302	283.438	219.542	287.8	127.338	146.466	313.046	234.36	126.724
	95.7215	274.758	100.329	353.052	428.352	260.661	464.138	474.13	749	141.73	347.104	95.9844	176.569	107.143	124.655	197.696	183.235	269.757	187.509	276.619	225.636	396.308	696.4	202.438	124.253	177.474	214.778	107.558
	114.899	237.514	103.578	378.247	466.179	272.859	306.566	458.573	778.753	150.079	423	111.657	141.8	108.417	98.4576	178.887	203.187	334.932	284.696	242.414	322.092	488.333	1725.79	237.5	96.5375	231.175	272.986	102.776
	108.375	263.671	110.661	327.279	471.747	255.186	286.846	600.62	853.578	200.557	412.988	120.962	206.125	101.761	112.7	186.307	172.114	199.082	329.348	188.86	310.033	315.662	791.366	256.767	105.493	322.329	187.972	93.4394
	163.316	237.928	102.097	428.5	176.614	239.253	327.173	430.397	850.37	190.508	386.417	135.931	158.756	107.224	117.351	146.221	202.661	97.4583	288.596	206.329	327.914	393.045	664.408	273.408	120.179	160.957	273.492	99.1967
	167.864	234.541	108.969	314.942	691.167	258.535	342.271	518.987	826.068	189.381	519.697	104.727	141.526	107.431	113.362	213.392	176	217.909	228.84	277.145	195.4	399.08	551.494	292.412	105.57	72.918	326.77	100.972
	125.015	263.574	109.897	381.544	451.031	292.222	464.84	513.013	817.587	175.283	460.641	120.492	57.625	95.4684	93.1549	174.107	250.855	244.481	268.052	269.966	294.508	365.338	578.947	138.984	117.554	251.385	237.86	84.5385
	141.614	178.313	108.136	350.462	410.293	283.375	553.161	602.068	939.875	321	492.861	120.362	145.355	114.778	115.101	171.16	203.095	266.325	238.597	243.135	403.281	316.436	1017.23	298.962	131.554	187.125	187.567	100.975
	132.717	232.461	143.094	370.679	493.737	279.766	512.838	484.076	656.824	264.84	468.652	119.151	129.197	95.6406	141.698	181.224	179.685	281.928	254.875	230.553	328.547	320.783	681.261	268.205	119.384	269.461	211.091	103.765
	120.545	245.5	136.797	411.961	301.857	333.543	540.806	518.308	541	240.589	398.089	148.031	118.571	112.557	98.5862	195.5	162.077	223.361	304.625	200.942	322.667	352.316	692.373	269.574	121.984	249.731	238.123	105.365
	141.409	254.681	114.557	409.333	291.897	295.25	472.281	400.18	1326.44	240.46	662.247	94.4028	144.491	89.4444	116.949	188	163.013	318.69	223.079	219.928	314.459	349.974	1051.16	289.214	124.264	110.577	185.344	97.9403
	137.55	280.027	111.089	275.239	579.846	241.095	649.706	526.838	942.8	244.663	362.667	120.356	159.016	104.621	121.25	180.826	187.855	206.636	337.032	235.932	306.894	331.292	812.581	151.299	115.053	251.475	232.661	103.037
	145.156	310.909	108.551	302.656	494.985	311.389	464.25	432.268	612.559	350.533	542.922	113.836	153.778	106.214	101.938	187.558	192.09	259.868	267.627	226.718	274.597	241.391	255.817	124.099	100.297	102.373	245.9	85.5584
	142.545	280.026	104.818	249.762	388.114	127.429	326.012	478.051	746.514	246.568	681.59	116.692	157.224	105.282	104.827	170.353	199.75	145.962	237.699	256.97	387.301	300.448	224.625	217.468	134.771	316.297	273.819	111.464
	139.114	284.829	113.064	363.459	559	107.257	667	465.93	1004.29	228.103	623.212	125.417	157.887	75.1587	120.592	172.61	269.75	219.575	263.134	167.455	210.456	286.441	536.403	285.37	111.955	272.654	257.408	85.4167
	133.164	278.9	125.231	233.557	371.875	132.529	370.534	517.353	102.88	201.017	574.932	117.716	136.338	89.9859	105.706	167.459	216.657	250.506	184.074	233	414.754	244.079	983.618	135.236	93	95.5385	234.059	116.907
	124.333	353.303	103.355	372.152	483.13	86.44	346.736	564.923	719.273	165.042	421.944	121.766	155.893	90.5857	140.228	188.714	232.603	231.584	229.427	177.32	333.823	341.574	782.167	227.214	115.75	208.394	261.842	89.5254
	131.585	316.946	99.5833	294.897	523.286	135.732	411.931	387.961	773.215	103.641	294.111	145.956	142.385	108.77	145.945	181.078	207.804	245.944	250.631	231.244	309.014	471.508	615.237	190.707	118.545	222.403	245.627	108.714
	145.985	319.541	88.5441	303.91	479.608	126.69	527.696	488.912	704.515	256.419	450.925	160.19	120.455	99.375	138.934	202.459	136.862	227.675	194.652	239.667	301.868	466.589	469.578	276.324	102.178	107.242	230.557	87.7813
	130.356	279.926	94.1724	320.822	600.651	234.211	172.415	124.847	617.435	264.197	458.164	150.453	161.267	101.507	136.729	207.125	186.313	227.827	286.662	224.649	328.513	419.855	426.91	212.974	134.117	124.043	294.383	90.2836
	124.913	309.403	95.3611	313.888	520.552	151.564	428.136	132.482	483.179	260.819	379.844	174.289	148.221	92.5132	115.848	170.789	211.94	245.724	246.366	182.2	286.655	480.883	880.347	176.162	133.985	247.678	207.792	97.4918
	158.338	286.516	131.644	369.625	729.529	131.605	342.828	511.885	423.308	230.136	343.262	245.833	157.526	100.137	127.762	190.508	177.69	219.192	285.21	215.057	275.083	358.673	493.783	239.012	125.716	137.349	281.216	114.541
	112.316	262.566	129.23	281.028	588.869	122.208	300.685	482.362	573.942	147.31	485.012	163.738	157.145	99.4177	110.914	183.031	182.811	234.586	269.06	199.929	343.672	313.982	706.857	256.554	125.044	167.271	232.172	86.2568
	115.179	277.824	97.4262	316.661	435.179	127.949	251.851	440.043	638.685	153.176	380.658	156.597	140.744	120.838	112.278	180.824	173.932	222.676	324.247	222.321	297.806	303.864	620.6	114.275	115.436	107.912	205.814	86.3214
	152.934	279.339	113.132	273.607	135.667	122.162	260.074	436.617	570.661	172.922	613.157	159.208	159.758	111.537	128	187.829	172	223.091	229.792	200.724	324.014	340.689	1272.72	186.014	82.6301	147.809	228.581	107.714
	156.145	279.237	102.897	328.833	159.462	104.4	406.943	294.039	493.683	222.342	545.292	153.5	165.345	109.597	115.333	194.561	163.031	54.6714	238.833	244.378	287.829	284.723	601.039	295.679	113.316	102.952	217.072	88.589
	137.016	300.42	113.754	268.354	189.109	110.403	411.672	442.53	434.538	468.759	616.436	144.973	139.507	89.8133	121.792	158.987	168.708	55.726	219.643	195.154	279.732	207.361	499.224	274.899	130.328	157.182	219.478	92.6429
	138.702	288.588	93.5263	299.125	551.914	156.814	455.974	345.427	310.969	218.515	541.681	179	166.406	104.911	136.901	183.379	180.783	77.4615	283.815	217.573	320.692	418.828	606.705	293.962	139.694	143.7	224.108	93.4571
	126.064	256.912	114.611	257.521	422.143	115.649	563.035	378.803	661.713	230.382	578.923	168.055	148.857	102.165	147.618	166.773	173.431	47.0141	274.261	238.737	267.215	258.711	605.53	242.9	145.464	108.474	243.295	111.864
	129.579	241.712	88.2069	241.319	678.821	162.222	257.441	386.974	519.017	177.924	423.4	161.962	157.39	99.1622	127.987	178.628	175.923	53.3784	293.05	167.397	316.667	212.048	535.366	242.635	119	320.379	226.438	102.639
	115.625	302.662	90.5224	318.781	640	128.761	383.218	292.532	641.719	331.096	351.063	175.052	119.42	97.1899	120.466	183.611	59.6	35.1719	245.195	256.831	328.446	373.941	506.727	304.692	137.359	145.81	159.471	112.151
	121.684	265.368	113.532	292.658	572.623	171.85	246.487	325.176	600.036	139.983	308.276	179.732	150.541	108.477	106.179	175.718	62.0952	65.6125	243.045	185	313.443	236.25	726.034	270.787	115.779	91.6	282.091	105.455
	112.22	287.845	114.262	286.193	602.554	146.284	284.453	343.797	229.347	194.929	404.429	161.806	166.754	103.579	111.134	177.597	362.153	42.4844	170.761	228.362	301.603	315.159	833.957	240.885	143.464	247.515	283.828	91.1538
	119.909	345.158	98.8824	247.175	617.277	109.277	311.972	325.829	692.911	162.676	326.578	163.404	152.783	107.324	122.689	179.194	297.778	243.689	246.125	195.073	307.324	307.123	500.423	245.805	128.13	206.267	236.052	99.5
	139.553	259.987	108.865	238.692	233.889	142.662	182.875	355.643	558.63	285.87	526.958	170.443	156.062	106.158	127.25	188.015	202.397	259.614	284.057	201.945	327.115	354.516	271.623	184.87	133.606	203.388	247.372	93.7742
	148.274	283.083	112.936	411.425	664.725	130.667	260.901	313.721	641.114	198.182	458.838	136.532	154.444	86.322	127.382	168.893	222.308	158.812	225.932	255.425	342.5	396.684	599.459	249.831	127.066	135.107	246.877	107.609
	149.513	258.853	115.973	287.338	455.205	122.659	519.782	280.054	634.403	355.133	433.329	166.078	146.397	88.7941	116.836	168.6	255.493	234.5	224.879	215.965	279.615	365.756	398.211	282.828	112.062	139.155	195.233	92.0847
	124.982	292.683	97.2857	338.308	388.343	170.758	516.123	310.475	579.787	238.667	492.836	167.25	167.571	100.017	129.707	192.355	267.426	201.342	183.667	219.361	284.5	286.465	472.056	156.702	124.457	237.139	207.393	123.493
	219.324	276.275	106.231	238.313	418.552	295.053	460.855	342.1	260.115	274.944	393.413	160.605	147.354	114.448	122.868	199.051	229.939	277.5	253.275	247.797	302.13	344.544	687.514	234.95	113.487	224.256	270.625	91.7975
	120.654	256.095	89.2436	289.351	249.211	136.446	305.152	324.134	590.42	169.975	484.4	176.753	220.629	122.957	132.756	221.295	230.805	340.165	311.936	187.264	295.657	362.483	801.76	236.368	122.338	304.218	240.778	104.119
	130.21	276.857	122.403	227.367	157.493	311.065	357.095	275.405	610.577	240.186	377.649	170.182	150.449	95.1594	121.838	201.77	216.637	295.304	232.526	234.522	275.397	322.87	595.586	246.706	173.822	234.239	221.4	90.3797
	154.013	269.429	125.838	289.493	629.385	313.083	143.043	324.197	716.3	273.227	188.324	164.934	164.631	105.727	120.486	216.851	213.5	250.81	287.662	189.2	307.667	247.587	712.89	230.224	202.179	218.099	235.164	73.2414
	135.295	292.707	121.105	261.671	483.959	337.068	565.711	307.923	647.162	221.797	305.649	156.911	183.958	97.2174	139.448	227.482	163.233	50.7231	254.743	207.538	345.288	272.5	647.486	267.018	118.554	108.595	239.661	97.1077
	116.718	316.862	108.645	272.908	527.037	342.657	241.471	349.717	749.316	450.961	384.304	191.554	144.8	91.6623	95.3623	217.292	215.478	241.507	268.554	188.052	292.6	416.636	784.844	227.427	132.325	246.211	238.753	99.9107
	107.478	241.605	123.297	391.205	558.734	108.462	319.75	316.047	621.712	231.805	335.971	178.227	168.125	81.1714	98.7231	233.644	283.273	227.278	236.149	209.886	263.935	294.468	480.477	237.636	110.387	105.574	343.586	74.431
	102.257	236.413	105.385	356.984	460.9	224.438	220.36	286.378	735.092	195.522	181.584	153.842	130.052	94.0769	128.823	269.1	239.81	206.054	274.767	211.628	280.288	503.778	518.879	165	112.047	206.525	248.851	95.8033
	122.373	240.59	137.803	440.338	511.358	255.063	245.222	392.535	789.258	247.25	446.743	155.277	138.792	112.625	139.256	290.636	191.986	231.788	275.947	287.085	268.663	334.062	360.018	220.622	198.018	146.727	268.216	112.218
	128.844	270.444	112.582	417.563	705.056	91.8873	332.493	390.045	642.099	238.306	515.256	154.031	157.688	113.644	109.793	187.163	173.754	254.545	219.912	209.468	265.033	374.964	446.064	295.068	181.533	132.608	238.121	101.494
	150.944	325.43	90.0159	406.349	679.129	371.707	327.554	330.135	614.243	235.765	428.685	176.714	162	116.405	120.911	184.81	261.421	231.896	240.052	225.013	298.268	381.782	495.574	237.222	125.082	122.831	202.073	99.3429
	137.576	282.171	124.569	404.75	367.132	316.141	346.5	334.763	716.304	99.7846	397.427	174.972	147.205	101.61	136.6	190.175	181.983	219.221	202.538	195.333	231.613	338.648	463.919	224.891	193.847	121.478	207.262	89.3898
	121.855	265.23	136.718	506.718	447.132	317.523	471.013	340.013	647.052	202.147	404.247	154.526	157.253	104.261	112.595	208.403	150.053	209.933	264.867	208.986	326.465	191.239	541.726	249.063	133.069	96.7763	231.154	116.649
	151.095	270.312	113.938	475.943	415.235	176.75	188.974	305.426	603.704	224.267	534.984	172.932	170.225	98.0526	120.025	227.839	244.692	222.75	258.367	199.218	220.521	455.117	184.164	317.208	165.895	35.2667	193.392	98.4051
	137.351	276.342	112.944	418.587	232.959	276.646	616.315	273.582	544.194	199.344	485.125	167.987	181.648	110.515	124.901	239.734	237.597	233.9	227.052	270.922	169.013	299.435	265.507	205.235	101.513	163.829	208.432	112.704
	199.105	290.292	122.532	398.423	554.278	332.154	486.973	317.69	692.895	230.949	285.1	161.292	175.1	104.514	140.708	252.708	261.028	198.87	148.359	205.949	142.4	232.868	193.339	226.429	136.033	273.987	220.649	105.662
	154.311	296.493	117.224	405.37	540.275	377.712	251.724	305.723	663.058	193.446	228.722	151.706	161.263	94.0156	131.523	224.563	144.797	158.473	249.534	216.783	200.775	308.266	291.333	211.026	150.373	148.792	231.532	113.239
	126.067	255.788	107.128	429.382	672.243	273.139	261.747	326.897	507.411	194.359	182.368	148.873	162.866	127.266	115.157	340.5	269.629	227.474	254.527	165.267	91.8689	306.756	284.864	190.985	123.5	203.987	220.145	90.525
	109.932	296.614	114.083	425.707	224.097	281.417	210.571	291.525	846.787	153.942	454.263	176.725	206.708	84.9118	131.947	180.861	152.016	227.565	275.269	200.441	170.364	313.785	203.286	268.357	199.41	130.571	283.842	90.0294
	137.35	257.486	132.162	433.756	425.042	304.825	320.282	309.985	578.048	216.127	364.457	174.955	181.712	104.183	147.045	180.108	238.811	191.719	302.573	167.975	202.161	265.947	274.259	174.817	116.591	135.639	248.118	91.3333
	133.845	319.944	143.392	397.813	523.257	274.576	211.884	305	688.987	220.808	187.934	174.093	142.5	87.7458	125.056	204.557	261.221	170.266	248.355	174.325	216.973	345.143	294.842	265.203	94.0794	212.637	297.197	102.348
	151.342	296.711	132.973	563.355	609.712	316.469	560.18	355.662	714.912	142.487	545.063	136.119	176.6	79.9821	107.23	236.718	252.518	196.81	230.062	162.403	175.209	291.788	229.224	179.591	95.5263	212.048	223.844	111.879
	556.794	241.316	116.348	397.015	682.203	346.37	161.765	465.435	752.186	183.776	215.177	164.339	158.551	80.1515	135.054	208.72	238.095	259.687	199.169	243.033	100.26	495.577	290.645	187.423	213.915	146.765	216.519	99.0667
	461.211	234.15	92.2763	433.771	322.205	280.261	726.369	350.809	516.459	269.794	701.592	145.705	176.101	103.057	112.133	350.6	270.662	241.559	200.437	245.043	188.525	436.763	269.895	249.482	133.087	197.845	202.169	109.662
	292.243	357.057	113.538	480.507	479.909	293.821	345.776	499.581	813.229	164.2	639.286	200.757	142.55	112.367	102.212	173.147	225.081	229	267.329	151.737	205.167	284.782	259.422	219.045	206.829	138.411	244.088	108.984
	313.141	231.456	112	342.867	560.987	313.612	617.186	426.183	738.962	397.803	669.562	166.433	140.688	100.154	110.178	187.239	246.382	213.5	225.486	214.522	199.328	245.935	260.567	252.343	251.515	191.807	236.441	105.026
	758.611	257.123	125.289	428.297	721.794	369.317	356.058	479.934	574.852	341.45	584	155.462	150.862	110.529	126.806	202.073	259	303.316	232.551	223.479	162.267	339.305	313.122	194.288	153.295	177.633	238.746	80.7857
	414.877	275.87	120.404	423.328	165.845	174.493	198.408	475.031	547.375	256.615	551.219	170.526	162	92.6173	109.365	188.24	209.475	244.212	220.405	255.494	216.071	324.768	348.718	214.526	268.818	155.358	291.641	102.283
	557.241	249.971	137.824	437.984	161.848	118.026	612.42	381.727	870.221	239.355	650.1	159.544	138.345	96.75	122.815	216.967	233.103	214.068	309.085	195.28	124.393	227.397	282.881	212.071	127.946	149.907	256.891	89.803
	192.779	251.418	126.228	394.851	285.608	127.087	240.672	399.181	644.71	245.191	627.2	167.045	143.662	117.747	117	179.145	232.52	195.122	229	178.286	208.37	343.932	266.581	246.172	200.278	187.851	249.863	93.9867
	190.517	272.703	106.382	451.184	311.882	110.84	394.063	454.284	465.338	345.369	336.575	148.453	172.877	107.768	117.917	208.487	226.737	232.103	172.897	143.286	196.542	371.117	323.258	227.333	229.089	136.143	284.356	91.5342
	213.286	267.5	108.632	465.329	315.243	88.8571	206.474	336.013	839.873	212.766	699.786	165.418	160.164	97.6615	118.872	225.625	252.522	145.526	240.615	187.822	218.174	378.779	201.23	200.295	140.537	211.025	269.093	94.7759
	623.533	276.306	110.179	415.212	187.574	220.899	145.123	322.288	602.838	494.162	667.522	145.695	254.42	102.013	115.086	190.759	235.525	252.256	202.842	210.127	169.942	396.156	273.052	130.924	263.754	151.071	260.253	79.6757
	482.947	306.013	102.509	382.357	150.823	88.4915	372.071	369.367	734.088	293.071	406.424	161.291	159.329	109.027	116.667	335.163	264.609	212.862	204.13	245.154	416.667	385	273.526	217.857	272.675	145.646	313.581	78.8481
	183.597	275.774	132.479	385.474	126.159	87	269.375	331.681	720.588	217.333	645.486	169.639	156.716	108.466	119.586	215.206	224.636	210.217	190.746	235.16	79.0159	294.917	467.362	228.14	147.595	145.436	260.795	100.05
	540.709	285.367	117.097	431.076	305.507	101.576	220.072	402.026	786.316	274.684	228.929	170.537	163.443	97.4625	116.348	170.25	244.379	217.169	250.935	278.165	181.688	179.533	273.821	254.559	296.576	169.039	243.959	102
	192.39	268.95	102.831	457.119	170.902	163.5	578.244	302.347	693.382	229.986	509.171	188.564	130.556	92.2131	132.359	228.958	219.282	236.115	275.892	189.883	188.974	338.151	277.932	190.575	186.718	260.957	218.138	85.8852
	182.639	258.933	126.09	368.234	334.338	125.156	267.741	385.532	458.125	275.628	487.408	160.757	141.175	113.221	116.387	201.351	194.763	213.475	315.667	269.507	184.744	305.973	314.985	206.951	234.962	173.974	226.167	104.963
	211.36	282.817	116.565	435.393	249.416	136.2	267.757	340.814	840.737	212.324	363.564	153.5	163.68	94.924	118.388	241.987	162.295	215.412	259.734	152.362	226.587	294.042	294.542	236.783	129.04	149.367	244.274	98.1053
	572.806	276.475	119.044	456.609	110.708	119.905	275.367	343.96	961.6	198.041	523.313	186.558	153.176	108.31	123.333	189.603	136.429	315.783	276.696	207.07	152.347	397.909	273.646	244.096	212.41	144.623	223.333	118.65
	167.522	315.345	113.425	333.054	293.343	95.0779	179.058	232.033	654.342	521.273	694.188	159.101	157.186	101.893	115.688	181.078	204.35	175.432	251.618	189.296	445.59	402.313	229.462	213.644	287.986	150.264	210.877	95.6709
	167.879	331.389	112.589	366.164	118.434	137.625	177.7	304.681	712.039	458.705	382.098	191.194	149.185	92.0429	120.357	215.766	254.119	207.165	280.824	213.823	252.544	483.262	214.897	188.091	139.667	122.338	286.211	81.8929
	197.206	282.42	120.768	367.173	191.169	459.797	315.818	304.116	537	343.975	421.706	205.474	134.014	94.4394	108.984	188.423	265.481	220.169	317.165	201.949	203.789	406.337	228.714	184.934	152.986	138.507	282.404	109.929
	187.281	311.063	126.569	467.85	215.237	109.379	275	278.987	614.437	138.753	246.606	168.587	130.667	89.4407	120.739	191.811	235.787	229.809	236.378	282.91	279.299	318.955	230.237	160.75	107.682	141.82	204	110.821
	46.443	329.684	114.464	326.928	247.195	108.901	611.103	436.594	776.667	272.745	570.175	167.903	155.986	81.7656	126.443	196	239.514	234.615	234.772	212.773	171.067	397.175	273.139	240.617	125.195	109.662	237	103.606
	346.509	267.164	107.293	390.064	148.829	540.518	611.973	383.051	810.222	326.574	738.561	127.174	164.684	85.7391	117.672	247.044	250.971	208.154	241.789	232.655	390.112	367.899	258.217	178.015	111.746	263.337	244.468	100.971
	169.576	243.68	91.8955	368.868	275.522	188.587	505	413.865	765.273	397.12	456.434	169.986	173.859	107.638	122.746	245.582	220.044	212.508	314.621	181.622	314.95	353.761	272.147	142.887	117.328	141.236	228.667	93.4203
	163.816	247.932	142.703	423.918	194.361	481.434	412.362	318.449	663	332.605	445.033	148.588	169.679	107.039	124.273	222.706	198.732	199.785	236.346	151.942	215.877	359.881	300.725	193.616	120.036	155.754	365.787	92.5075
	174.846	265.987	118.774	349.908	209.789	578.071	486.818	300.027	577.909	174.472	563.219	159.207	138.439	118.394	149.985	173.657	228.158	223.823	307.934	172.61	188.921	429.46	230.339	239.179	185.561	203	300.718	96.0625
	450.735	278.177	99.1695	282.922	198.14	437.421	317.644	387.097	675.125	134.423	453.988	165.209	181.403	95.5556	119.959	174.9	289.869	214.763	221.246	230.229	184.625	329.143	217.017	133.569	143.444	203.483	216.377	86.3051
	175.397	264.466	104.371	498	150.484	220.164	254.583	339.279	755.582	150.325	525.494	151.61	156.836	113.417	132.094	203.842	131.303	276.038	282.026	170.675	189.791	321.433	237.25	263.694	122.985	171.667	229.431	91.8889
	178.526	267.68	117.792	446.627	235.295	321.833	247.412	385.16	597.672	208.485	211.507	158.034	184.294	111.535	119.85	205.684	189.062	229.273	329.091	175.259	344.984	454.421	308.247	269.918	128.301	137.521	271.767	84.9143
	524.39	276.658	115.873	339.958	380.975	576.859	540.581	472.479	827.513	201.453	591.125	173.824	188.108	102.875	139.016	271.079	197.954	248.958	292.778	185.904	309.899	417.544	220.333	117.973	105.507	163.108	218.262	81.4304
	163.681	280.262	108	348.566	391.318	532.281	516.655	490.792	555.368	240.923	623.344	147.764	132.157	110.406	95.5455	166.479	206.415	198.293	266.206	237.125	294.737	283.532	163.983	225.292	128.921	124.225	219.652	108.582
	233.97	284.453	94.9	453.295	219.597	356.488	280	345.442	761.696	198.716	765.192	198.066	161.684	104.127	116.881	201.448	293.734	252.969	291.621	187.672	226.757	354.986	267.397	196.015	176.23	227.4	276	98.0263
	186.883	267.81	127.453	409.712	151.739	376.132	162.521	498.959	916.608	278.323	653.646	158.848	166.312	87.2241	114.688	196.804	171.947	240.842	237.778	172.477	381.041	420.7	335.242	159.657	114.884	260.328	256.731	105.356
	308.888	206.635	127.542	339.585	278.804	485.754	344.4	448.158	676.459	224.645	564.228	141.014	152.741	93.6727	138.984	216.613	189.117	164.016	263.701	167.618	353.351	556.141	288.646	245.478	166.182	159.159	237.185	99.339
	190.459	276	100.551	416.944	131.012	578.322	323.405	351.632	738.646	161.733	439.897	164.085	160.731	112.705	104.85	157.597	203.048	286.542	298.121	163.269	255.262	487.472	269.186	141.487	131.691	207.515	255.425	100.956
	296.127	260.638	133.909	485.263	388.419	153.948	419.206	421	748.714	207.43	616.194	193.41	142.26	105.556	106.679	205.833	181.608	190.333	313.141	192.911	164.043	225.705	242.927	200.574	124.754	142.918	216.675	120.171
	485.767	243.25	102.587	502.81	141.211	262.474	375.527	304.8	882.043	168.757	367.348	169.5	179.732	105.047	113.893	177	225.576	219.58	179.781	200.859	195.53	199.284	221.048	247.5	121.571	154.635	218.878	102.353
	285.605	293.848	94.6557	410.25	228	518.054	340.873	345.714	569.581	253.966	560.545	157.052	191.71	117.81	123.016	177.507	187.831	112.934	251.243	235.87	166.441	242.508	321.949	172.737	318.646	163.268	267.379	104.961
	171.564	343.369	125.8	345.397	315.082	562.552	498.835	357.769	401.92	229.75	487.905	193.762	149.068	99.931	138.56	165.597	185.305	180.758	245.395	175.921	211.529	297.974	321.014	236.228	94.3553	185.632	329.707	98.4063
	324.104	226.286	98.1467	345.274	141.712	633.179	181.672	390.971	205.716	70.2933	302.691	185.914	154.985	107.75	140.36	170.071	203.228	175.232	223.759	220.281	193.652	236.873	232.121	132.423	280.063	130.438	249.127	94.8312
	366.256	238.969	96.3793	362.042	362.459	473.932	386.443	331.281	382.976	134.257	294.284	161.897	154.574	108.923	141.487	208.807	190.137	183	143.085	187.267	187.62	242.135	291.696	206.469	139.274	154.153	208.65	115.333
[truncated: 17,539 more rows]
