# Supplementary material for: Fibrodysplasia ossificans progressiva mutant ACVR1 signals by multiple modalities in the developing zebrafish
Source: eLife. 2020 Sep 8;9:e53761. doi: 10.7554/eLife.53761 (PMC7478894; doi:10.7554/eLife.53761)
Supplement: Figure 5—figure supplement 2—source data 1. [file elife-53761-fig5-figsupp2-data1.xlsx]

## Sheet: Fig 5,S2
bmpr1aa+/-,ab-/- incross	2 pooled experiments
																			Mut
Total number of embryos in each category
	Figure column	1	2	3	4	5	6	7	8	9	10	11	12
	Genotype	bmpr1a+/-	bmpr1a+/-	bmpr1a+/-	bmpr1a+/-	bmpr1a+/-	bmpr1a+/-	bmpr1a-/-	bmpr1a-/-	bmpr1a-/-	bmpr1a-/-	bmpr1a-/-	bmpr1a-/-
	Morpholino KD	none	bmpr1b	bmpr1b and acvr1l	acvr1l	bmpr1b	bmpr1b and acvr1l	acvr1l	bmpr1b	bmpr1b and acvr1l	acvr1l	bmpr1b	bmpr1b and acvr1l
	Ligand mRNA	none	none	none	human ACVR1-G328R	human ACVR1-G328R	human ACVR1-G328R	none	none	none	human ACVR1-G328R	human ACVR1-G328R	human ACVR1-G328R
	C5	0	0	95	0	0	0	0	25	32	0	0	0
	C4	0	0	2	0	0	1	36	3	0	0	1	1
	C3	0	0	3	0	0	0	0	0	0	0	1	0
	C2	0	0	1	0	0	0	0	0	0	0	0	0
	C1	0	0	0	0	0	0	0	0	0	0	0	0
	WT	24	76	0	9	4	1	0	0	0	3	3	2
	V1	0	0	0	34	50	7	0	0	0	10	11	2
	V2	0	0	0	21	11	40	0	0	0	6	13	5
	V3	0	0	0	2	7	9	0	0	0	1	1	3
	V4	0	0	0	0	0	1	0	0	0	0	0	0
	V5	0	0	0	0	0	0	0	0	0	0	0	0
	Total	24	76	101	66	72	59	36	28	32	20	30	13
Percent embryos in each category
	Figure column	1	2	3	4	5	6	7	8	9	10	11	12
	Genotype	bmpr1a+/-	bmpr1a+/-	bmpr1a+/-	bmpr1a+/-	bmpr1a+/-	bmpr1a+/-	bmpr1a-/-	bmpr1a-/-	bmpr1a-/-	bmpr1a-/-	bmpr1a-/-	bmpr1a-/-
	Morpholino KD	none	bmpr1b	bmpr1b and acvr1l	acvr1l	bmpr1b	bmpr1b and acvr1l	acvr1l	bmpr1b	bmpr1b and acvr1l	acvr1l	bmpr1b	bmpr1b and acvr1l
	Ligand mRNA	none	none	none	human Acvr1-G328R	human Acvr1-G328R	human Acvr1-G328R	none	none	none	human Acvr1-G328R	human Acvr1-G328R	human Acvr1-G328R
C5	1	0	0	94.0594	0	0	0	0	89.2857	100	0	0	0
C4	2	0	0	1.9802	0	0	1.69492	100	10.7143	0	0	3.33333	7.69231
C3	3	0	0	2.9703	0	0	0	0	0	0	0	3.33333	0
C2	4	0	0	0.990099	0	0	0	0	0	0	0	0	0
C1	5	0	0	0	0	0	0	0	0	0	0	0	0
WT	6	100	100	0	13.6364	5.55556	1.69492	0	0	0	15	10	15.3846
V1	7	0	0	0	51.5152	69.4444	11.8644	0	0	0	50	36.6667	15.3846
V2	8	0	0	0	31.8182	15.2778	67.7966	0	0	0	30	43.3333	38.4615
V3	9	0	0	0	3.0303	9.72222	15.2542	0	0	0	5	3.33333	23.0769
V4	10	0	0	0	0	0	1.69492	0	0	0	0	0	0
V5	11	0	0	0	0	0	0	0	0	0	0	0	0
	Figure Column number	1	2	3	4	5	6	7	8	9	10	11	12
		1	2	3	4	5	6	7	8	9	10	11	12
		1	2	3	4	5	6	7	8	9	10	11	12
		1	2	3	4	5	6	7	8	9	10	11	12
		1	2	3	4	5	6	7	8	9	10	11	12
		1	2	3	4	5	6	7	8	9	10	11	12
		1	2	3	4	5	6	7	8	9	10	11	12
		1	2	3	4	5	6	7	8	9	10	11	12
		1	2	3	4	5	6	7	8	9	10	11	12
		1	2	3	4	5	6	7	8	9	10	11	12
		1	2	3	4	5	6	7	8	9	10	11	12
