# Supplementary material for: Fibrodysplasia ossificans progressiva mutant ACVR1 signals by multiple modalities in the developing zebrafish
Source: eLife. 2020 Sep 8;9:e53761. doi: 10.7554/eLife.53761 (PMC7478894; doi:10.7554/eLife.53761)
Supplement: Figure 5—source data 1. [file elife-53761-fig5-data1.xlsx]

## Sheet: Fig 5f
bmpr1aa+/-,ab-/- incross	2 pooled experiments
																			Mut
Total number of embryos in each category
	Figure column	1	2	3	4	5	6	7	8	9	10	11	12
	Genotype	bmpr1a+/-	bmpr1a+/-	bmpr1a+/-	bmpr1a+/-	bmpr1a+/-	bmpr1a+/-	bmpr1a-/-	bmpr1a-/-	bmpr1a-/-	bmpr1a-/-	bmpr1a-/-	bmpr1a-/-
	Morpholino KD	none	bmpr1b	bmpr1b and acvr1l	acvr1l	bmpr1b	bmpr1b and acvr1l	acvr1l	bmpr1b	bmpr1b and acvr1l	acvr1l	bmpr1b	bmpr1b and acvr1l
	Receptor mRNA	none	none	none	human ACVR1-R206H	human ACVR1-R206H	human ACVR1-R206H	none	none	none	human ACVR1-R206H	human ACVR1-R206H	human ACVR1-R206H
	C5	0	0	69	0	0	4	0	19	25	0	0	1
	C4	0	0	0	0	0	0	36	0	0	2	2	1
	C3	0	0	0	0	0	1	0	0	0	1	2	1
	C2	0	0	0	0	0	0	0	0	0	1	0	1
	C1	0	0	0	0	0	0	0	0	0	0	0	0
	WT	104	41	0	11	4	0	0	0	0	2	1	0
	V1	0	0	0	13	20	1	0	0	0	2	2	2
	V2	0	0	0	9	2	16	0	0	0	3	6	3
	V3	0	0	0	5	3	22	0	0	0	6	1	4
	V4	0	0	0	9	9	4	0	0	0	4	3	0
	V5	0	0	0	22	40	22	0	0	0	8	6	9
	Total	104	41	69	69	78	70	36	19	25	29	23	22
Percent embryos in each category
	Figure column	1	2	3	4	5	6	7	8	9	10	11	12
	Genotype	bmpr1a+/-	bmpr1a+/-	bmpr1a+/-	bmpr1a+/-	bmpr1a+/-	bmpr1a+/-	bmpr1a-/-	bmpr1a-/-	bmpr1a-/-	bmpr1a-/-	bmpr1a-/-	bmpr1a-/-
	Morpholino KD	none	bmpr1b	bmpr1b and acvr1l	acvr1l	bmpr1b	bmpr1b and acvr1l	acvr1l	bmpr1b	bmpr1b and acvr1l	acvr1l	bmpr1b	bmpr1b and acvr1l
	Receptor mRNA	none	none	none	human ACVR1-R206H	human ACVR1-R206H	human ACVR1-R206H	none	none	none	human ACVR1-R206H	human ACVR1-R206H	human ACVR1-R206H
C5	1	0	0	100	0	0	5.71429	0	100	100	0	0	4.54545
C4	2	0	0	0	0	0	0	100	0	0	6.89655	8.69565	4.54545
C3	3	0	0	0	0	0	1.42857	0	0	0	3.44828	8.69565	4.54545
C2	4	0	0	0	0	0	0	0	0	0	3.44828	0	4.54545
C1	5	0	0	0	0	0	0	0	0	0	0	0	0
WT	6	100	100	0	15.942	5.12821	0	0	0	0	6.89655	4.34783	0
V1	7	0	0	0	18.8406	25.641	1.42857	0	0	0	6.89655	8.69565	9.09091
V2	8	0	0	0	13.0435	2.5641	22.8571	0	0	0	10.3448	26.087	13.6364
V3	9	0	0	0	7.24638	3.84615	31.4286	0	0	0	20.6897	4.34783	18.1818
V4	10	0	0	0	13.0435	11.5385	5.71429	0	0	0	13.7931	13.0435	0
V5	11	0	0	0	31.8841	51.2821	31.4286	0	0	0	27.5862	26.087	40.9091
	Figure Column number	1	2	3	4	5	6	7	8	9	10	11	12
		1	2	3	4	5	6	7	8	9	10	11	12
		1	2	3	4	5	6	7	8	9	10	11	12
		1	2	3	4	5	6	7	8	9	10	11	12
		1	2	3	4	5	6	7	8	9	10	11	12
		1	2	3	4	5	6	7	8	9	10	11	12
		1	2	3	4	5	6	7	8	9	10	11	12
		1	2	3	4	5	6	7	8	9	10	11	12
		1	2	3	4	5	6	7	8	9	10	11	12
		1	2	3	4	5	6	7	8	9	10	11	12
		1	2	3	4	5	6	7	8	9	10	11	12
