# Supplementary material for: Fibrodysplasia ossificans progressiva mutant ACVR1 signals by multiple modalities in the developing zebrafish
Source: eLife. 2020 Sep 8;9:e53761. doi: 10.7554/eLife.53761 (PMC7478894; doi:10.7554/eLife.53761)
Supplement: Figure 5—source data 2. [file elife-53761-fig5-data2.xlsx]

## Sheet: Fig 5f Mean
Mean pSmad1/5 flourescence
Condition	Het No Injection	Type I KD	Het mRH	Type I KD mRH
	31.2084	21.7342	69.409	148.156
	30.7463	19.5136	122.942	49.0902
	27.9533	24.4694	100.237	62.7437
	25.6675	18.9799	71.6325	57.2631
	30.2382		110.204	81.9828
Average	29.1628	21.1743	94.8848	79.8473
Std dev	2.31995	2.49965	23.6654	40.0602
T-test two tailed unequal variance
Het no inj		0.00230805	0.00326974	0.0472511
Type I KD			0.00207111	0.0304404
HetmRH				0.495089
Closest value to mean	31.2084	19.5136	110.204	81.9828
embryo	WThet.20190405.bmpr1a.noinj.131.WThet.calibrated - Copy_[ims1_2020-04-02T11-43-25.565].xls	Null.20190309.bmpr1aahetabnull.6abMO+8MO.219pm.30.calibrated - Copy_[ims1_2020-04-02T11-43-27.049].xls	WT Het 20190212.20190129.bmpr1ahetbnull.hAcvr1R206H.336pm.14 - Copy_[ims1_2020-05-19T12-36-17.516]	Null 20190405.bmpr1a.6ab8MO.hRH.143 - Copy_[ims1_2020-05-19T12-36-17.516]
