# Supplementary material for: Fibrodysplasia ossificans progressiva mutant ACVR1 signals by multiple modalities in the developing zebrafish
Source: eLife. 2020 Sep 8;9:e53761. doi: 10.7554/eLife.53761 (PMC7478894; doi:10.7554/eLife.53761)
Supplement: Figure 5—source data 3. [file elife-53761-fig5-data3.xlsx]

## Sheet: Sheet1
Values	11918	9912	12424	11876	12236	5407	10117	13363	13020	9761	9554	10654	12505	10322	11669	7540	15041	7344	12090
Min	2.66667	2.01667	2.14865	4.0303	5.91667	2.2375	3.14035	4.18033	5.01563	3.63636	3.65823	3.06667	4.15385	3.14063	4.4375	1.43478	2.23944	2.625	3.13699
Max	122.864	128.275	133.864	244.263	108.03	128.433	239.806	196.807	210.652	225.904	50.2687	40.4487	43.1324	51.7692	238.471	171.027	198.375	198.654	188.582
1st Quartile	20.3832	11.423	15.2368	18.3473	15.932	57.1796	91.9	83.3576	34.7987	80.5085	18.7647	16	21.4237	14.3085	124.238	28.5789	54.8974	30.4625	31.4579
3rd Quartile	40.5656	47.0265	38.175	31.7682	42.1599	83.0205	155.222	119.909	103.538	139.658	24.6358	22.9474	27.3529	23.3077	179.984	82.0072	107.705	88.7135	64.72
InterQuartile Range	20.1825	35.6035	22.9382	13.421	26.2279	25.8409	63.322	36.5514	68.739	59.1495	5.87105	6.9474	5.9292	8.99925	55.746	53.4283	52.8076	58.251	33.2622
Lower Limit	0	0	0	0	0	10.6661	0	17.565	0	0	8.19681	3.49468	10.7511	0	23.8952	0	0	0	0
Upper Limit	76.8941	111.113	79.4636	55.9259	89.37	129.534	269.202	185.702	227.268	246.127	35.2036	35.4527	38.0255	39.5064	280.327	178.178	202.759	193.565	124.592
Values in	11770	9901	12168	11590	12225	5398	10117	13326	13020	9761	9436	10647	12452	10300	11631	7540	15041	7342	11892
Values Out	148	11	256	286	11	9	0	37	0	0	118	7	53	22	38	0	0	2	198
Mean	31.2084	30.7463	27.9533	25.6675	30.2382	69.409	122.942	100.237	71.6325	110.204	21.7342	19.5136	24.4694	18.9799	148.156	57.2631	81.9828	62.7437	49.0902
Median	26.0368	20.9041	20.9712	22.0432	23.2909	70.8144	129.567	102.958	62.7511	115.814	21.4427	19.3214	24.2641	18.2165	155.667	55.2771	83.1316	56.8196	45.3443
	Fig 5k	Fig 5k	Fig 5k	Fig 5k	Fig 5k	Fig 5k	Fig 5k	Fig 5k	Fig 5k	Fig 5k	Fig 5k	Fig 5k	Fig 5k	Fig 5k	Fig 5k	Fig 5k	Fig 5k	Fig 5k	Fig 5k
	Het no inj	Het no inj	Het no inj	Het no inj	Het no inj	Het hRH	Het hRH	Het hRH	Het hRH	Het hRH	Null Type I KD	Null Type I KD	Null Type I KD	Null Type I KD?	Null Type I KD hRH	Null Type I KD hRH	Null Type I KD hRH	Null Type I KD hRH	Null Type I KD hRH
	WThet.20190405.bmpr1a.noinj.131.WThet.calibrated - Copy_[ims1_2020-04-02T11-43-25.565].xls	WThet.20180718.bmpr1ahet.noinj.9.2pm.calibrated - Copy_[ims1_2020-04-02T11-43-25.565].xls	WThet.20190405.bmpr1a.noinj.127.WThet.calibrated - Copy_[ims1_2020-04-02T11-43-25.565].xls	Het WT 20190312.Bmpr1aahetabnull.86.633pm - Copy_[ims1_2020-05-19T12-36-17.516]	Het WT 20190312.Bmpr1aahetabnull.93.633pm - Copy_[ims1_2020-05-19T12-36-17.516]	WThet.20190212.20190129.bmpr1ahetbnull.hAcvr1R206H.221pm.6.calibrated - Copy_[ims1_2020-04-02T11-43-28.518].xls	WThet.20190212.20190129.bmpr1ahetbnull.hAcvr1R206H.336pm.14.calibrated - Copy_[ims1_2020-04-02T11-43-28.518].xls	WThet.20190212.20190129.bmpr1ahetbnull.hAcvr1R206H.212pm.5.calibrated - Copy_[ims1_2020-04-02T11-43-28.518].xls	Het WT 20190405.bmpr1a.6ab8MO.hRH.138 - Copy_[ims1_2020-05-19T12-36-17.516]	WT Het 20190212.20190129.bmpr1ahetbnull.hAcvr1R206H.336pm.14 - Copy_[ims1_2020-05-19T12-36-17.516]	Null.20190309.bmpr1aahetabnull.6abMO+8MO.202pm.27.calibrated - Copy_[ims1_2020-04-02T11-43-27.049].xls	Null.20190309.bmpr1aahetabnull.6abMO+8MO.219pm.30.calibrated - Copy_[ims1_2020-04-02T11-43-27.049].xls	Null.20190309.bmpr1aahetabnull.6abMO+8MO.226pm.29.calibrated - Copy_[ims1_2020-04-02T11-43-27.049].xls	Null 20190309.bmpr1aahetabnull.6abMO+8MO.hRH.516pm.62 - Copy_[ims1_2020-05-19T12-36-17.516]	Null.20190309.bmpr1aahetabnull.6abMO+8MO.hRH.340pm.50 - Copy_[ims1_2020-04-18T13-38-40.101].xls	Null 20190405.bmpr1a.6ab8MO.hRH.136 - Copy_[ims1_2020-05-19T12-36-17.516]	Null 20190405.bmpr1a.6ab8MO.hRH.143 - Copy_[ims1_2020-05-19T12-36-17.516]	141	137
	29.3676	64.4211	44.973	12.1408	17.7403	41.6203	37.3846	121.16	16.4737	33.2154	20.8929	18.7534	24.2692	25.5065	172.319	39.5156	26.4487	6.62687	55.7468
	23.7273	55.4648	64.7747	16.5735	35.75	95.4324	54.4935	125.934	101.351	48.1299	26.9643	25.5075	21.7534	17.7164	108.078	35.3623	23.3529	32.4789	26.1324
	18.0278	74.4937	58.3846	21.4179	45.3684	85.2759	57.8451	114.246	29.3	51.3857	22.3919	18.0278	30.1846	25.2838	187.465	27.2113	23.8333	48.9706	59.1282
	24.5156	66.0135	36.3067	16.4878	50.4304	88.661	90.4304	142.615	18.806	83.4805	27.806	24.3077	18.8485	18.9342	190.237	30.9733	26.3621	43.5909	59.3115
	22.2895	74.6154	35.6949	18.3433	32.4143	31.5541	135.821	138.274	80.4237	120.506	23.2239	18.8971	22.5974	25.1754	106.943	44.1111	90.5128	29.8	72.6349
	25.4754	86.2432	83.9452	12.5085	27.7746	85.9178	51.6053	144.31	31.8966	45.9867	27.1667	27.0274	8.76389	19.8393	203.831	101.613	26.5972	67.8846	48.039
	25.5385	53.1594	41.4182	17.5479	26.2923	80.6944	50.1967	114.708	107.618	44.7167	25.1515	17.9737	24.8429	33.411	184.092	107.041	80.6349	43.6438	69.7536
	23.194	46.7941	66.5395	11.8765	27.6154	87.1	46.1449	108.111	55.7121	40.7826	26.3293	23.5063	35.3478	32.4091	210.299	82.0597	50.2468	121.775	31.6379
	30.9605	51.8571	79.8904	14.3448	37.9825	67.7258	78.0132	55.2	41.9733	69.961	22.7671	21	26.15	24.9324	198.436	34.1552	111.525	32.3875	54.8228
	24.8462	74.6081	64.2273	11.9861	50.4906	86.3151	68.9667	113.184	130.9	61.5593	26.2667	18.8571	23.6522	24.4384	195.859	28.1875	97.519	25.7857	69.9265
	23.8772	84.3214	88.2192	15.6364	47.0128	36.5217	116.4	139.507	97.9836	102.184	17.8382	18.8592	26.2405	26.2308	172.203	29.6618	98.3797	37.1579	26.7467
	23.4648	74.3793	25.64	16.2468	15.2532	91.2297	91.2027	145.892	56.6441	82.0435	21.9859	24.55	25.2	19.9143	173.814	84.7538	97.9625	56.6375	59.1857
	25.8333	88.1351	56.4583	12.8923	19.2949	36.0411	78.359	123.887	63.4848	28.8667	21.6377	18.3175	27.6234	21.2078	209.932	37.9714	20.6613	138.962	27.0132
	27.6711	56.4643	49.0845	16.1067	18.9125	83.209	33.2133	146.082	115.924	69.8718	25.7206	32.1587	26.3784	30.8448	224.338	47.4286	24.619	15.5263	42.3284
	23.0141	41.6761	55.9403	14.6027	21.1449	99.8929	79.3205	108.271	58.7875	100.229	23.7286	33.1429	30	27.25	201.672	35.0462	23.1746	133.415	31.8909
	23.2667	29.4833	57.0781	13.7424	22.4118	80.0513	113.183	133.658	31.5484	78.8608	21.8904	18.9107	23.9851	33.5763	181.949	107.338	24.8974	28.9375	44.4576
	26.3816	29.0128	89.1607	13.5517	25.473	80.4366	88.3827	152.911	66.2192	31.8429	25.7538	25.1857	24.0282	19.4474	81.1034	95.0938	22.7042	69.9242	45.8028
	21.5714	60.6207	80.4304	13.7414	15.2667	93.5946	35.7887	157.548	69.5195	79.325	20.9231	24.4407	22.6111	28.5088	197.298	59.0845	24.5818	72.5571	64.2833
	21.8219	24.4571	77.7237	19.5156	21.0833	108.508	69.8226	116.156	86.6229	61.6719	22.3538	27.1304	20.5	25.2857	206.321	30.75	25.2586	27.6406	49.7013
	26.4714	48.6	18.0299	18.4211	25.3571	85.1	79.2615	133.079	126.303	70.0769	24.4429	17.4853	24.4143	27.557	177.762	98.0455	25.5278	61.4935	48.8537
	27.5926	41.9726	48.9041	17.1304	14.7167	92.4286	78.1579	99.9571	122.23	68.3377	24.6338	27.2632	27.0149	18.6897	104.966	96.0411	26.4677	61.6119	66.5147
	19.5857	40.2031	66.5128	20.0303	21.1519	91.0714	61.6102	116.926	54.7848	54.4167	21.3056	22.0556	27.5385	15.403	170.63	32.4737	22.0167	131.457	69.1923
	26.597	46.1579	56.3768	20.6812	24.7838	103.633	54.8784	137.65	35.9625	48.4459	25.0615	28.7308	30.0735	25.7719	193.352	84.3623	25.9167	56.5443	52.8961
	26.2131	47.7164	97.1449	18.3506	24.8861	91.924	116.714	129.921	104.155	103.329	25.5897	21.3582	30.1528	28.8169	207.493	80.7703	22.5075	22.5938	23.2917
	27.7778	49.4931	41.6552	19.7627	27	74.6552	73.9839	130.818	89.4789	67.2576	23.5672	23.1528	30.5493	20.0385	192.904	110.225	23.4211	63.8545	49.1579
	22.8333	39.619	27.8382	16.4684	26.8462	68.6515	98.169	137.684	101.187	86.6761	24.3803	21.5085	28.6585	28.0641	172.424	84.7895	34.2787	17.9333	59.2603
	26.3099	47	52.2639	15.3623	21.4107	85.0253	60.2346	121.456	116.897	53.1728	21.4493	15.3056	30.44	16.2027	70.2	33.6029	30.5556	35.1757	26.141
	20.4935	47.6923	51.0789	11.5789	30.4125	91.25	68.6308	143.492	98.3733	60.7778	25.1724	20.1316	29.1039	16.9844	178.967	95.7206	27.3333	32.3026	48.1831
	18.1724	51.6923	43.8987	13.0714	34.3333	78.12	69.25	65.2432	104.884	75.1667	23.3944	22.9483	31.4098	25.5875	185.471	74.9615	30.2564	19.1404	73.4348
	19.4127	62	45.5821	12.7813	34.2727	103.07	66.7273	110.519	51.7143	58.9481	21.6667	27.2687	33.3571	27.4925	174.861	116.155	89.2609	48.9394	57.4684
	26.0806	31.4583	28.6892	16.3947	21.2405	67.6	86.1724	118.237	121.917	76.1724	17.9839	23.3067	25.6667	24.5	80.1594	82.2603	27.3485	103.408	32.3636
	21.5658	45.5352	48.5811	17.6607	27.3538	39.6957	67.5211	173.344	35.9828	103.31	18.0294	27.6567	32.5	20.6765	192.029	19.8	110.958	120.816	49.4561
	28.4359	43.5152	50.9143	19.1017	17.5077	31.3621	116.465	88.9189	30.7121	85.125	26.0154	22.6081	21.029	33.9	184.147	110.656	47.5278	90.4412	56.7179
	23.1884	31.4459	59.68	14.3797	27.614	87.8276	96.2051	129.896	58.2879	151.179	28.1449	20.7377	38.7759	13.2931	182.209	98.3276	86.8	56.1515	57.2113
	23.64	52.6522	59.0556	19.16	31.2576	74.7273	166	149.936	67.1176	119	25.322	25.3684	28.3182	21.6618	192.333	84.3377	64.4769	73.403	57.431
	23.7667	39.7945	59.7333	14.5	17.9487	72.7273	134.043	119.31	33.9867	96.1169	17.95	26.0517	31.8194	38.141	86.6986	73.3636	46.4416	59.9306	135.945
	19.5667	60.7375	84.8462	18.4789	36.0417	41.2667	109.408	150.833	78.2667	69.7705	19.9516	17.8378	31.8788	28.1341	200	92.7297	87.9231	54.619	50.2237
	24.2078	38.2206	22.1765	16.2625	44.4688	108.932	78.3333	143.973	115.016	35.3684	27.2029	20.3816	28.4487	22.0137	180.918	104.961	32.2647	62.8077	52.3289
	23.36	70.3816	79.9859	13.7167	27.7288	107.357	39.7241	109.676	53.2	49.7288	20.7083	27.3833	30.3289	36.1184	174.781	90.1538	64.1186	54.4028	135.15
	21.1739	48.3676	73.1857	17.3108	35.9583	33.5278	55.6833	154.034	56.2121	75.7361	23.6491	31.1972	33.4262	22.9178	161.738	101.618	96.7692	41.338	60.5614
	21.4167	53.2436	37.1594	16.7857	34.9878	52.44	84.7662	120.382	63.0862	69.575	25.3553	26.8333	25.6667	17.4262	173.516	97.6167	42.5286	25.661	122.493
	21.8354	47.2152	65.4286	18.4321	40.0455	71.3793	78.75	121.468	68.2603	75.5077	25.9828	17.8485	27.3974	25.6571	172.393	108.771	35.6667	59.7593	48.1154
	26.5345	55.1471	82.2949	14.4154	23.2051	106	85.9375	142.054	58.2949	81.7742	26.8182	27.8205	25.6714	26.2278	168.346	96.9412	105.013	43.0303	140.071
	20.12	51.8732	58.9839	18.1449	30.7368	107.442	89.931	65.4054	94.2568	112.761	25.8971	25.7193	26.45	25.4923	160.797	98.9286	62.8966	32.4079	29.9844
	21.7353	56.1846	84.3014	16.0385	43.7015	103.645	127.597	125.072	62.4769	106.162	29.3784	23.9016	28.0676	31.7794	89.541	98.8261	79.2692	33.1864	136.704
	28.2949	56.9464	69.6081	16.6579	24.2321	78.1385	120.725	120.239	34.5067	69.6447	21.9643	25.4416	32.7576	26.7089	54.425	37.4091	35.5325	83.1379	62.8529
	19.8101	47.2817	57.6389	20.3056	27.8642	69.5	79.2027	102.754	61.6145	70.9315	20.0789	24.6447	28.2763	28.3529	153.123	106.644	104.299	58.1552	62.6
	23.1625	54.8571	71.1013	16.7857	21.0986	98.4444	59.1538	95.8983	106.393	52.5455	28.1974	27.6883	22.0333	25.4407	188.316	89.3509	154.025	111.889	122.095
	19.4	38.6833	69.8529	19.2143	30.6286	126.506	87.6667	116.101	63.4493	77.4167	25.4091	22.6622	11.7925	25.7671	185.893	34.2203	98.3594	63.8167	52.6333
	26.1167	43.8649	91.2576	26.2432	21.3768	77.013	64.2051	121.576	95.9861	57.3117	25.2658	26.8	31.507	22.2468	182.716	91.575	35.0441	32.3421	169.371
	25.029	55.9595	58.2949	18.9459	16.3514	103.514	83.7821	110.821	56.5921	74.0897	22.4051	14.1803	28.7429	30.7	194.25	98.7895	92.0513	44.0893	122.901
	18.961	74.1818	51.5823	15.7123	23.0125	76.8955	89.2542	170.145	45.725	77.7018	24.5484	29.6579	30.6377	23.859	198.988	77.962	100.737	57.6338	45.4342
	18.1867	63.4559	64.9219	21.3472	27.1184	99.7321	132.316	139.609	89.2162	117.792	24.4211	21.3333	28.193	18.625	155.714	128.133	87.4557	22.8929	55.9859
	24.9344	53.6212	66.0519	15.6949	26.8226	83.6282	125.545	133	75.7164	111.881	26.2237	29.9733	19.6338	15.8596	184.71	86.9375	73.6709	33.5	155.629
	20.7	47.9815	80.1692	26.2679	22.6714	72.1026	108.533	135.882	46.2807	96	28.7903	26.5789	33.2237	26.55	175.857	31.0862	96.2344	62.4	119.932
	27.2958	55.3239	34.1594	16.0139	26.1935	37.1831	131.5	148.125	67.697	117.117	27.4691	22.4	33.9844	22.1579	185.59	42.027	132.167	58.2031	58.2687
	19.6026	29.8701	60.375	17.9221	32.3247	104.667	166.881	115.522	65.3667	151.606	25.2329	24.6897	24.4868	17.9324	171.441	38.3455	96.9342	118.414	73.1233
	22.4321	43.1045	48.2969	17.1818	31.0811	38.8378	98.7308	107.143	28.8	87.1923	27.961	19.9254	25.0923	24.4054	137.912	29.9494	79.6719	17.4098	71.029
	25.7662	50.641	55.662	19.9275	35.9344	114.691	116.029	117.373	97.8	102.014	18.75	24.5556	28.2951	25.3514	137.513	33.9265	85.5	22.6301	108.138
	15.8734	39.125	82.0541	19.9865	31.4054	90.6351	89.2676	124.085	68.5125	78.0145	27.7375	33.4342	30.0676	22.6875	170.135	83	69.9516	45.0727	114.911
	31.4605	37.8525	68.2785	14.7463	28.2911	101.299	109.13	132.2	56.2432	97.2564	24.4795	25.863	30.7895	33.6429	184.368	52.4603	92.3513	22.4154	38.4107
	25.7703	49.6027	78.4118	14.9178	35.4074	78.641	79.4308	155.106	70.1972	70.1385	22.2456	26.7143	29.3676	23.125	191.293	43.4051	77.8533	69.6567	61.2714
	40.2759	56.625	52.4364	15.3485	49.0167	75.7667	101.793	165.039	81.6032	85.9286	28.5714	22.1364	36.9625	27.9259	177.328	100.014	118.267	75.9153	51.0256
	25.7162	56.5441	57.9091	19.3651	25.7536	93.8676	72.0676	125.388	71.1316	63.75	24.8056	28.8	30.5833	22.2603	175.533	95.5909	74.6667	26.2987	45.4493
	29.85	52.8475	45.4931	16.5897	20.6892	36.6324	98.4667	127.757	25.3	87	23.25	25	28.0933	26.2208	181.203	53.5862	102.969	28.9841	76.7333
	20.1594	63.5254	59.9211	16.3043	38.2615	38.9726	108.174	119.426	71.9024	95.2424	25.1772	25.0536	32.0274	28.2105	68.7051	44.3485	94.3521	62.0435	165.595
	26.05	60.6528	71.6727	13.5938	24.5072	36.2895	130.493	119.321	79.48	115.394	29.4545	19.7662	31.0893	29.9167	141.711	113.141	79.0253	33.1449	188.582
	33.9857	31.3973	67.8333	19.5256	35	42.5441	101.158	121.517	94.5286	89.4605	19.9444	22.411	26.8533	22.3276	175.754	95.2821	97.7639	40.9296	43.9706
	35.4576	24.9737	71.6119	26.4459	41.5949	54.8312	68.2593	48.6034	86.7463	60.1125	20.2456	26.3038	16.8158	30.1724	107.291	41.425	69.871	57.6974	49.5063
	25.8667	59.4	62.175	17.0313	24.1786	61.75	81.6883	58.4286	75.8919	73.1974	24.2222	26.8971	23.125	18.3623	89.32	82.5128	78.3378	123.667	133.246
	24.038	66.3562	57.2564	13.1392	32.6441	108.198	91.4143	62.303	27.4912	80.6087	26.7458	23.5067	33.5584	24.3506	79.2879	88.5065	27.9079	150.405	54.675
	21.3611	59.4868	62.6308	18.1642	20.0959	51.2821	93.2879	134.936	45.8261	82.4154	30.5672	21.1029	31.2586	29.1667	116.711	78.1818	24.5606	149.299	63.6418
	23.962	42.5172	50.1148	12.3467	41.5325	60.359	88.2308	130.772	61.3026	77.9359	20.0139	26.2535	16.8861	29.0972	165.672	87.3438	29.3718	139.338	46.6667
	25.974	49.0789	53.8064	15.6842	25.3651	84.2899	130.325	103.582	60.0789	115.35	19.8889	31.1139	20.7887	28.5571	184.225	106.563	28.6964	129.328	71.1493
	20.1351	41.1719	89.2424	15.975	46.2794	94.7536	130.734	48.1148	66.3771	117.219	19.6081	21.0238	10.0417	21.2692	176.506	94.8696	29.4571	141.966	126.575
	29.6447	41.3425	75.6818	20.2167	44.5278	89.3099	91.8676	125.947	63.4627	82.4853	20	28.9605	19.6176	29.2368	198.217	115.908	29.3385	128.176	162.067
	21.9342	42.3012	42.473	22.3	16.641	103.95	101.679	48.2113	58.9367	90.6104	15.6786	9.67164	21.9231	33.5256	193.224	32.8	31.2083	134.757	65.5769
	26.2581	40.2692	41.2133	17.1538	27.7284	95.7027	97.2692	131.736	49.2368	85.9231	25.2174	14.5345	19.8276	24.569	180.321	34.137	18.8167	155.083	71.7564
	34.2714	77.6923	39.9571	20.7273	49.3288	94.9077	81.05	113.658	55.0517	71.1967	25.4684	19.0167	19.8814	35.4531	144.2	74.6479	22.925	120.932	51.2388
	23.9211	56.8784	42.0303	20.7838	26.2759	92.0299	66.125	109.475	35.0725	58.3625	29.2667	18.7468	23.7013	29.6026	211.934	35.141	26.5079	99.0167	62.2456
	21.0366	48.2727	65	17.6154	36.5132	83.6234	127.295	88.2361	60.5417	113.416	33.3151	10.6308	25.7826	26.8421	172.737	105.797	32.4737	25.75	44.0563
	27.8814	26.0141	50.1852	24.5897	35.0303	92.1714	104.59	113.675	57.4625	92.3846	28.1833	26.1266	24.1129	21.1029	158.614	79.375	24.8154	28.1918	64.5522
	25.2794	58.1795	34.9744	15.9444	20.0139	98.5696	109.089	129.603	55.3205	96.9365	26.0548	17.1475	20.75	25.9825	207.258	92.52	31.8642	115.588	60.8333
	25.0667	40.1733	44.5526	13.0794	32.569	97.1343	111.098	113.221	36.7429	94.4189	28.5125	19.075	13.0156	29.9474	154.104	67.8154	24.6119	150.701	126.909
	32.1286	63.3393	27.9412	18.8636	25.8923	92.9242	105.568	141.762	51.4714	76.6944	26.1765	24.2833	9.55556	19.2394	187.074	85.6912	27.8056	67.9286	58.1404
	25.8784	29.4118	31.375	18.7051	24.5205	79.9322	86.0685	114.848	61.3816	108.686	22.95	16	15.5294	22.2603	206.694	76.1728	28.7703	128.119	65.4342
	28.5696	49.0256	89.8649	23.9367	34.1053	87.7681	122.62	120.316	28.2877	97.8667	27.0125	26.9595	15.7941	25.425	163.686	42.6957	25.4308	32.1364	62.4643
	27.6901	19.4474	89.1341	18.7692	26.4483	71.6615	108.743	144.265	60.7143	74.0154	25.0145	26.8154	19.5942	29.6912	162.118	91.425	49.7536	39.16	119.629
	34.6912	40.6667	71.9344	30.4697	31.9079	83.0789	83.5606	125.273	141.911	108	25.8243	15.7143	10.875	30.1781	215.446	101.171	80.9538	122.082	65.7241
	31.9625	46.0833	46.6308	19.4098	37.274	100.176	119.358	119.115	105.421	196.042	23.3816	25.3462	19.6324	33.875	194.031	69.0633	114.534	67.2179	126.513
	21.8636	50.0909	100.675	18.3871	39.026	126.507	211.458	59.8841	95.6154	75.746	25.8571	26.0278	15.209	24.1528	161.257	33.7705	91.6308	148.474	78.6143
	26.1159	59.5526	42.0357	12.7391	39.1216	73.1071	86.1639	101.433	62.5672	66.3443	18.4474	23.9737	14.3429	22.6667	171.971	71.8833	67.942	83.5513	64.9359
	33.8714	54.2658	53.6324	16.0847	48.7121	63.3548	75.1148	126.129	52.7179	60.0317	23.1266	26.3226	13.5634	30.4615	179.118	82.6571	110.5	71.6129	54.5179
	26.8158	38.7671	59.9091	19.0462	40.0526	59.6667	68.7077	117.835	104.618	62.6829	22.1096	27.0139	13.56	35.0435	77.8525	85.2321	38.9298	62.1944	57.6866
	30.3611	43.2899	73.6364	16.8971	35.0164	107.169	71.2593	174.597	68.9342	97.1964	25.2	27.2632	20.0667	28.8971	166.857	97.2712	104.034	37.7966	75.1266
	24.5789	84.9839	74.075	17.6333	49.1646	106.018	109.879	129.435	59.75	99.5536	21.4265	27.0735	14.625	26.1552	177.125	67.3538	102.91	122.4	44.8545
	33.7792	73.5395	37.2658	18.55	30.2692	109.558	112.679	153.768	46.1304	112.23	25.7586	16.5714	13.3208	34.3621	196.429	41.6866	85.597	123.736	63.1389
	25.013	68.7813	39.9828	17.1912	32.7143	87.12	126.122	116.299	69.975	126.128	18.4167	26.4938	17.7792	29.2319	199.782	94.6974	84.6029	45.9583	50.1642
	35.1053	32.2174	41.5286	17.2105	21.4861	95.0806	142.579	139.314	90.4459	141.452	22.8481	29.6377	18.2	32.1613	184.584	88.5714	139.16	132.416	72.2
	35.65	52.4684	34.9322	21.5588	43.9714	91.3235	155.5	121	75.3478	72.325	26.1897	18.6364	19.5	29.9855	203.437	81.0517	94.6716	169.938	66.2308
	14.7541	50.4571	36.2	23.25	35.6027	93.7162	81.9125	118.661	82.7288	101.275	28.2459	21.5156	17.6053	24.6579	207.304	81.6892	39.8831	75.0571	47.4177
	30.6849	62.0986	37.2857	17.4933	31.3538	73.2537	78.473	149.946	30.803	92.6	25.375	24.9545	17.3571	29.8393	214.603	95.5735	50.2373	171.806	44.6575
	28.4868	51.4545	72.5641	20.1111	43.2	109.613	115.606	121.794	91.931	69.3478	26.8861	27.4426	19.7879	34.0256	212.356	98.125	30.3333	81.918	74.8718
	26.5273	38.7681	75.9125	14.6212	37.1519	93.4483	104.825	139.358	60.459	197.71	23.4487	16.6076	18.4935	30.4868	206.827	88.0897	101.362	18.4706	53.8406
	23.9853	59.3684	61.8939	18.194	34.6154	95.2794	79.8088	105.71	63.9118	60.5224	23.3205	26.3544	18.0294	36.5385	174.279	99.8	33.4384	68.8732	80.3559
	33.4923	36.8082	91.8406	16.8889	51.7432	79.7778	212.97	125.161	65.7761	134.413	18.4737	22.971	15.6207	20.0132	134.597	86.7397	82.4844	65.0513	83.925
	25.8333	49.8052	73.6034	14.8182	37.6875	47.8788	68.5231	96.8354	110.203	97.0395	25.2097	24.0135	16.9718	28.1282	205.647	87.4507	89.5429	63.5946	71.1447
	33.3973	50.1186	100.029	20.6711	20.5667	86.7077	149.413	113.169	83.775	94.5479	22.2368	20.9359	27.4474	32.3443	206.718	107.256	41.1233	50.8611	66.45
	33.9324	45.0128	88.3944	25.8116	48.8611	97.1039	108.179	116.493	42.6757	59.9643	22.2712	23.35	35.6709	28.0375	205.909	87.5526	98.2295	86.3393	63.1379
	33.9844	45.1695	60.6604	21.4394	40.5067	73.8143	103.882	127.162	50.0263	80.875	31.1899	21.8026	28.6607	30.1207	186.458	112.557	99.0625	72.3099	66.0789
	32.0563	54.3871	32.359	24.0123	31.0323	97.9872	66.8947	121.257	70.641	134.407	29.2597	21.4203	31.6351	31.2969	178.984	29	35.2	45	56.1481
	29.8026	60.0676	38.3158	17.9221	39.4054	98.5179	92.375	130.957	56.141	107.085	24.0656	28.3134	31.1132	28.9516	175.611	89.1333	78.8955	47.2368	69.4359
	36.0429	54.8	27.5362	21.507	39.3	73.2615	150.25	150.123	72.5395	100.462	31.0154	24.4675	28.2353	26.6027	186.936	102.128	109.95	173.493	72.1781
	26.4138	31.0536	30	23.1833	39.8919	99.8525	120.339	116.618	100.658	101.534	26.9079	28.8571	28.0893	29.4667	193.082	84.7027	90.7794	151.82	76.2286
	28.2436	18.9231	45.2759	21.4429	40.661	93.3538	113.462	117.321	28.5417	97.8816	31.5694	29.8861	30.8095	24.5079	238.471	69.1	103.526	170.609	57.1842
	24.8906	21.1724	31.25	16.9153	34.4615	107.372	113.55	114.701	81.3966	65.5246	24.3171	25.9697	27.8904	21.3158	195.688	93.7721	31.1067	112.5	58.7193
	34.8625	48.84	56.1311	19.9649	31.0968	89.8026	109.303	129.813	70.6056	88.0571	32.0833	28.3846	25.5823	32.4667	161.886	107.576	39.7826	60.029	46.7179
	26.9	41.4091	43.4051	6.90141	33.8289	116.074	74.1639	125.833	62.72	82.6667	30.3333	22.6207	32.0448	30.1429	198.789	71.1061	74.825	124.264	75.9756
	30.9221	32.8824	42.1406	17.2319	31.7778	82.1467	98.9296	118.417	62.082	115.803	30.15	27.2963	29.1139	32.3289	207.55	78.9359	131.507	73.2703	60.7361
	26.3974	41.7051	33.6406	18.2625	34.3699	89.3158	92.3607	126.942	132.623	146.2	23.803	28.1311	27.8816	26.9012	204.792	101.431	91.2208	37.6986	49.8154
	27.2615	35.9016	63.6066	20.6324	22.4706	66.7097	130.644	137.925	73.8395	118.971	29.2903	18.2321	29.3509	30.3425	210.125	73.7105	97.7778	113.453	66.3051
	27.2658	29.1857	50.9483	16.5303	30.8358	86.9853	161.328	137.28	102.068	183.3	27.4333	24.7059	33.3636	27.8462	212.431	26.6494	29.5375	59.4648	59.3276
	26.0405	42.3333	64.1781	15.9873	40.3134	95.3906	133.676	164.015	82.8784	130.721	23.0506	24.0143	27.6575	25.5823	192.727	109.635	36.9744	124.787	50.1194
	24.038	27.431	40.6721	10.8571	24.4576	87.9667	195.857	132.843	57.1688	72.0143	24.6111	28.8182	33.8657	31.2949	180.295	105.027	36.2329	107.597	133.614
	17.8103	33.8158	34.2632	18.1125	30.3509	76.4615	148.305	123.902	60.6757	55.95	19.4833	31.2712	28.6375	31.875	183.176	98.3117	34.1429	85.0986	42.6667
	31.3553	30.3117	32.8621	21.8101	27.5217	108.062	81.9577	104.911	106.883	163.864	29.9821	28.4211	22.2692	31.5455	177.837	97.0154	26.8261	125.687	70.1525
	30.4872	19.0685	80.3947	23.6053	41.6308	49.0385	63.0656	118.197	99.5541	117.518	21.9063	27.7069	27.675	29.1918	155.286	84.9211	30.1918	125.118	49.4684
	24.716	34.8507	47.6607	19.6711	40.3507	111.312	182.483	144.333	139.643	149.092	21.3662	25.9474	24.791	23.1644	156.261	88.6552	115.944	71.2836	61.1045
	29.6026	34.8182	46.4051	17.0164	18.84	73.4394	120.215	61	64.9138	135.377	27.2931	23.8276	31.5781	30.918	171.092	87.2467	39.8714	28.0727	37.2167
	27.9848	27.7463	41.3544	19.5616	25.8548	103.75	163.28	128.186	74.7838	133.712	25.4833	31.2857	28.4833	28.4054	176.085	80.8289	28.125	49.9444	22.12
	28.0345	33.9853	33.8108	14.1711	22.8406	115.896	152.313	120.727	102.725	145.987	29	28.4394	30.4737	27.4085	171.928	80.2464	23.7593	85.0789	34.6892
	30.9744	26.6076	38	17.9737	26.9841	119.625	150.603	139.532	69.4265	68.3067	29.5385	22.7568	32.2368	24.8228	206.436	102.768	25.6102	83.4921	25.6567
	20.9167	30.9595	58.72	16.9016	38.3026	87.2586	162.363	118.618	68.1918	144.672	21.4853	24	26.831	24.96	202.31	93.527	26.1875	80.2	76.2083
	34.2632	28.0714	62.3836	20.9733	28.8861	81.8442	77.473	137.609	61.5696	90.2059	25.4844	25.3333	29.4865	24.8116	185.133	39.1186	32.3871	148.286	139.219
	26.45	39.3125	33.2027	14.9194	50.0294	111.71	156.015	123.297	109.065	99.2105	30.7027	24.0833	29.7612	33.9306	178.873	109.018	102.383	70.0345	91.2162
	24.4189	15.1786	27.1757	19.8592	53.2958	76.2923	101.304	127.038	57.443	92.9452	27.5147	28.0645	24.7595	27.8421	123.529	110.809	103.877	49.4677	32.25
	33.3784	37.0694	48.5065	19.5167	26.7838	101.885	112.263	134.324	102.362	59.3676	27.2667	23.0545	34.5769	31.2807	182.625	92.6567	90.2436	66.6818	56.5135
	29.3562	40.3291	36.5	11.8235	42.2933	91.6912	105.444	137.462	128.122	89.7821	34.589	25.2727	34.641	28.8955	199.745	40.8036	113.181	80.6667	56.8904
	25.2414	15.8333	63.05	13.4627	41.8831	104.293	67.2794	139.091	84.4648	109.538	29.3231	34.7727	24.2805	25.303	115.976	116.831	79.589	68.5077	55
	22.2424	30.4219	27.9359	19.3667	28.1692	97.7308	102	128.552	54.8406	92.0395	22.775	30.9	30.9	21.6456	206.697	125.769	37.1552	76.4091	51.8197
	27.859	43.6486	34.9333	12.3902	22.9103	98.2576	124.125	152.153	85.8734	150.754	27.2667	25.6618	29.7368	30.5135	160.848	107.493	98.8472	70.069	129.896
	30.141	48.2381	36.5574	18.7945	23.5195	42.0833	104.118	117.976	115.1	99.5217	25.8831	32.8088	28.3692	29.1034	166.031	26.0758	111.221	43.5714	95.7049
	26.9565	30.5286	30.7101	18.1781	23.038	73.9677	166	149.886	126.589	130.8	30.425	29.3766	30.8571	30.75	168.291	90.4706	116.55	78.2787	32.6316
	27.1515	37.6329	35.2586	17.4306	41.2899	74.6885	112.549	126.985	100.25	65.3279	27.1867	24.2034	25.5606	19.8281	153.944	73.925	108.893	57.48	40.4605
	30.2875	30.6944	46.0746	22.0339	39.3718	106.438	146.753	131.194	122.671	141.69	24.6712	23.0263	32.4795	30	198.114	99.8133	44.9821	81.431	154.279
	23.303	20.4648	43.4595	17.0732	32.75	44.8393	72.1356	113.39	60.7973	179.241	28.4655	21.7143	32.7368	26.4203	212.958	82.2785	95.0694	32.8182	63.0896
	34.0556	16.3214	40.0128	15.7246	24.0921	81.24	157.424	174.043	58.0395	68.1642	34.9403	25.0253	36.2133	32.7419	198.842	115.205	86.4545	91.0541	65.0429
	24.6957	59.029	37.3375	23.2174	45.35	101.379	196.625	127.118	84.5167	143.27	28.08	23.0667	30.6486	26.6463	199.171	85.7468	104.554	91.2658	148.478
	31.15	37.5065	35.1304	14.7015	27.1385	114.648	75.3676	122.91	139.278	150.513	24.9333	24.3056	36.3816	17.8312	201.708	89.4474	39.6795	66.9545	58.6667
	29.5507	28.9079	33.7581	25.8861	28.9872	87.3559	158.36	134.171	58.6575	108.475	28.7763	27.9481	29.8028	21.7895	161.756	130.558	94.0714	97.0758	46.6081
	27.7534	42.6379	58.2317	25.519	27.8689	87.2319	165.475	108.238	121.603	110.672	23.0862	28.6076	26.5469	22.1125	192.738	146.605	87.0303	61.0282	59.3333
	37.3247	34	37.6429	22.2623	39.8228	77.7105	121.667	108.684	74.7119	85.3846	24.0811	30.2414	27.4727	27.5286	204.088	111.676	68.7097	75.7465	92.5
	27.4068	39.8475	52.6197	22.1176	56.5775	95.7747	125.689	105.845	152.597	78.0137	28.7121	24.0508	30.6667	31.2987	185.297	93.6849	91.5273	52.2742	49.8909
	27.6301	44.3662	48.2857	22.4493	32.3793	93.8	96.5692	104.911	77.0154	138.538	30.5	22.4627	30	30.1184	206.661	77.1013	129.787	99.75	58.1316
	31.45	34.7027	40.4915	22.2208	44.5696	76.6607	88.2329	145.209	60.6418	171.25	17.8529	26.1519	26.1013	33.6027	213.803	94.4179	92.1282	128.429	25.5303
	33.3134	35.3571	66.25	22.7222	29.6528	110.89	188.574	132.539	92.9875	148.649	25.8621	24.2703	31.5	19.2308	169.182	104.873	84.7273	123.562	62.1731
	26.8481	22.4079	78.3418	22.0429	48.9315	78.8889	165.753	72.9649	65.3243	92.6579	30.2083	24.5	25.5538	34.8226	161.958	94.8082	101.033	96.5424	69.0132
	24.7089	27.4054	106.578	15.2535	28.4688	103.154	104.19	61.0909	110.788	156.707	28.5844	26.6154	28.3944	25.4464	205.343	118.409	42.9275	62.2388	71.7647
	33.8	19.2368	82.7973	15.1818	30.2895	125.563	174.259	148.175	100.848	144.247	24.9701	29.2286	30.4051	33.3857	201.52	98.9444	30.5811	98.9315	53.5362
	24.5397	28.7606	68.3214	18.1061	35.0769	111.052	160.215	56.0476	133.631	145.132	25.4722	29.2143	29.8267	16.7571	193.81	84.5714	30.473	114.667	67.7681
	24.5974	19.8514	67.8421	20.0125	31.9103	101.882	160.411	130.158	109.192	189.342	23	26.5231	30.5769	22.0635	87.4923	96.4058	28.15	98.7534	87.0164
	33.3143	36.625	105.353	25.7273	27.7538	82.4	206.452	57.2714	96.24	62.5882	26.0143	34.8333	39.4412	28.5139	208.175	95.6622	24.7531	115.609	54.1212
	29.4	29.6071	29.4407	28.4918	42.1299	114.137	71.2687	119.439	158.403	99.5974	25.7397	26.141	30.3509	18.1026	192.213	36.7458	95.8788	42.8592	27.2958
	38.3971	31.6786	57.9487	29.2656	55.9867	103.485	112.753	124.113	67.9855	63.72	29.6076	25.7571	30.9221	28.4286	208.711	101.323	32.4394	84.8088	60.0476
	35.8169	39.8704	70.4923	36.987	55.2742	91.375	72.9189	137.513	91.3151	90.0152	26.9733	24.4085	25.1579	26.5733	209.105	96.5536	32.475	75.0423	60.4058
	36.5634	30.4267	64.6	37.1375	53.1579	95.8596	101.758	150.507	67.4304	137.409	18.7797	28.8305	30.9241	19.2368	208.957	138.875	30.942	81.0847	141.386
	40.3064	36.6133	61.541	43.4658	46.0635	71.3448	155.103	64.322	121.273	177.986	30.6667	23.7101	30.8077	30.2059	201	92.0278	115.683	68.7857	56.5972
	30.3896	28.0267	50.5278	24.1948	18.3521	110.671	195.37	101.962	85.1948	169.743	31.4727	24.8103	27.6053	23.5246	200.708	121.423	32.8718	33.2836	91.6176
	26.1786	29.775	60.8889	28.1463	29.5	88.3934	183.147	142.697	90.6951	129.263	28.1096	23.2	31.7368	29.5128	187.479	109.757	105.5	70.4328	29.9692
	22.8194	23.7162	64.3115	30.8116	37.0492	105.723	145.197	51.0781	83.2933	133.309	28.6852	26.3056	33.1406	24.1558	121.277	76.5974	118.687	130.308	62.2029
	30.9595	24.3235	37.3103	31.8246	44.8	74.6441	148.667	126.139	81.7013	124.962	32.6032	22.2857	30.6441	31.15	195.045	98.0735	17.5844	49.1333	79.7237
	26.5263	18.9286	68.8889	34.5075	27.2703	111.961	142.338	110.013	111.06	141.455	36.4429	24.0435	29.1711	20.1948	208.268	32.7692	24.6479	127.316	66.1127
	29.507	19.2679	76.8714	22.7297	44.7969	121.066	149.465	110.128	114.889	171.667	25.9464	29.2639	27.6438	31.4237	213.56	87.25	25.2034	30.9107	46.6
	23	21.8493	77.7705	27.2394	51.2059	106.171	157.333	162.23	94.0633	154.407	29.3158	22.5714	32.1842	32.6329	187.29	98.1219	23.027	52.5775	56.6429
	32.0455	55.4211	62.7324	28.5263	37.0769	91.859	189.609	106.684	75.0704	141.908	22.75	19.3913	28.8767	16.3108	198.493	109.887	38.9194	179.632	68.7536
	22.3793	20.4583	44.2597	31.4487	57.1857	98	173.61	138.833	83.3288	136.271	25.6486	12.4459	31.0789	13.5455	219.458	90.5593	24.1282	141.063	155.558
	29.7468	26.5789	73.8529	24	48.4444	98.6111	156.658	140.975	82.3276	105.266	28.5735	20.557	29.2807	19.3088	205.73	124.634	96.0455	51.7761	76.9737
	29.2658	36.75	80.0179	26.7846	42.5316	93.2712	153.186	107.068	123.316	168.366	19.8077	19.1304	29.1897	23.7846	171.329	75.5846	35.6923	111.077	63.6029
	31.1579	30.2933	49.25	24.9492	48.3377	106.027	119.762	116.014	43.3896	141.689	20.2941	14.6447	23	18.5263	181.667	101.089	24.1757	148.897	50.4853
	29.0893	33.3333	79.4571	35.4583	56.5769	97.9714	185.8	112.027	100.214	88.4868	25.4	22.5556	26.7049	17.2329	172.717	60.5938	24.5068	21.8	56.5897
	33.1875	38.8732	66.4483	23.15	36.2078	96.4412	160.817	112.308	127.987	85.3671	27	19.7647	30.6719	27.1408	186.462	124.078	26.9	16.6066	50.1067
	25.4028	18.7167	94.7705	35.339	30.662	111.462	100.263	94.7895	122.292	162.425	26.7123	26.3611	23.9508	27.0759	174.923	109.055	25.6667	33.871	36.6724
	30.7015	33.6806	72.662	36.9221	65.4211	90.7321	98.9494	136.853	117.909	115.129	22.8986	23.9194	26.0946	22.3014	92.5932	108.086	24.5614	67.7105	71.0909
	24.0172	30.8767	66.597	31.303	25.0897	98.0685	180.716	125.699	108.182	180.625	30.8382	24.1311	31.6563	22.0423	180.436	69.5082	19.1	23.1765	55.6029
	29.4615	29.8947	56.3214	24.7059	50.7692	69.1579	130.913	172.426	127.526	163.162	26.4359	20.9706	28.4366	29.9079	223.898	116.707	22.7391	26.6351	55.3692
	25.9333	24.5769	82.831	29.9211	29.4348	69.7059	191.339	62.9737	143.441	183.474	28.863	16.3947	26.3538	30.2208	201.4	95.974	23.1375	29.3067	83.5714
	33.4737	30.7531	51.3	31.5902	55.1857	95.05	183.676	138.635	110.291	98.05	34.971	21.2174	34.7193	16.2571	183.563	62.2545	25.3167	12.863	149.5
	22.4853	19.5256	65.6897	37.4828	31.3247	87.375	107.632	136.615	80.4459	81.4386	28.1266	23.5	30.2329	25.931	187.962	122.268	24.7222	43.5263	58.4868
	27.7662	22.0759	65.7848	33.7368	37.6883	107.158	93.2759	125.35	75.5593	132.592	29.55	21.3506	26.7	36.1389	174.987	32.5	29.9153	23.6667	71.1831
	34.8	13.2917	83.5278	23.8493	53.1714	96.9028	150.387	127.81	114.013	92.4	29.2787	17.2	29.5256	26.2949	170.629	96.7206	25.125	55.9342	156.165
	27.9219	21.5811	60.3393	38.7833	44.6119	109.791	104.4	153.284	112.75	140.671	24.6667	26.0152	23.3971	24.4833	174.562	46.7273	21.6102	77.2909	98.5493
	28.2113	20.3797	61.6104	27.8788	85.5614	77.6471	157.712	119.931	100.582	100.342	26.2911	16.3649	27.5167	34.443	189.188	43.2794	21.6462	16.137	62.2787
	39.3676	24.6892	64.871	30.6933	46.3671	128.433	113.135	134.493	136.719	112.4	27.9873	18.3188	33.2154	28.8095	194.137	63.9474	103.646	76.6034	53.4
	39.1406	17.1897	32.0417	38.1194	56.9853	113.377	126.836	95.2941	29.7778	149.363	27.6833	18.1549	22.64	21.2564	196.364	31.9855	91.1343	24.5195	53.3377
	30.3594	73.6167	73.8947	25.6833	35.6	90.5217	165.712	145.344	135	143.765	21.0833	16.2278	32.4074	30.1404	180.75	25.2241	72.1351	59.9848	50.3279
	22.9737	59.9153	66.1918	31.6184	55.7733	88.25	159.559	121.513	63	89.8421	25.0857	26.1571	35.0938	25.3421	187.622	75.7013	102.375	29.8421	61.807
	25.3115	69.2875	88.9655	34.4769	30.3016	95.0921	101.772	141.982	79.8793	168.304	29.6709	32.2167	29.6875	27.9697	193.5	107.391	74.3803	127.403	60.7467
	21.4714	63.5088	94.8939	34.4407	27.24	117.836	185.754	146.061	60.2344	149.507	26.4324	18.8276	26.2459	29.4675	175.91	39.5676	94.1818	153.548	64.8608
	21.082	34.0517	71.5735	22.4776	45.36	69.7941	163.65	105.13	124.582	130.034	22.8873	23.3662	34.9508	19.4464	190.821	97.2	89.1184	145.083	52.4605
	20.1791	87.6119	65.4156	18.3333	41.6984	76.2267	142.885	141.041	41.9178	155.519	25.4857	32.4242	33.7797	20.7879	209.238	98.2025	86.2987	41.569	71.1515
	22.338	84.3462	59.8667	20.9853	51.7313	106.45	172.861	118.077	32.1	170.148	25.1795	28.2051	32.5	27	209.342	82.2969	100.776	70.0323	54.975
	19.0986	26.2059	82.8056	23.8889	46.7403	63.1667	188.443	122.934	159.183	132.924	24.4688	27.7564	27	30.5254	190.145	34.6615	73.0897	34.6379	87.3214
	29.4394	77.7538	68.961	35.9315	32.75	73.4384	145.175	135.419	59.5882	153.743	26.6528	25.6111	30.6267	28.8108	177.712	102.855	69.8052	39.6471	78.1833
	22.1948	63.9872	86.1026	27.8101	58.0462	82.6667	200.167	86.3165	60.875	158.097	28.0299	13.6774	31.8378	26.6491	195.559	98.7763	101.186	72.8475	112.467
	25.8689	72.5974	88.5417	23.9859	40.0308	100.969	169.5	119.525	133.107	164.643	27.6184	25.0519	32.7468	27.5079	185.955	80.4848	94.8056	30.9571	80.4342
	20.1154	78.3188	82.039	26.8529	59.4875	96.2571	177.833	160.03	58.6027	117.806	20.7714	19.1538	23.9552	30.7941	200.254	58.274	76.5541	58.2167	96
	24.0857	63.7692	57.4386	31.3194	64.4931	86.9178	183.14	168.431	104.515	146.896	29.1139	24.4324	30	26.2	193.381	85.3966	81.3974	70.859	116.852
	29.3393	75.338	90.961	20.5469	46.4079	103.557	132.222	112.5	139.642	103.844	26.4605	23.5541	33.7429	25.5513	139.082	89.2712	62.8987	66.4182	60.8718
	31.7051	89.8861	50.013	19.6962	27.775	77.4677	164.013	139.101	125.73	107.907	22.7917	19.4521	27.4359	28.3115	171.781	39.569	76.9385	40.069	66.9667
	25.8553	73.0508	80.9825	16.8154	30.9275	90.3143	116.892	118.641	110.197	63	28.6429	25.7463	26.7333	25.7895	186.362	88.3562	62.2278	93.1487	71.4154
	28.5075	39.9474	65.2949	13.0984	59.7162	91.4507	149.227	113.645	141.838	143.441	26.3117	17.3247	34.0875	26.4091	164.148	78.9067	89.375	45.2027	74.5167
	32.1364	71.8974	68.0253	22.6625	39.0667	80.0167	121.571	126.132	78.875	136.878	26.8125	22.2436	29.9028	30.2625	184.872	101.962	68.1471	32.9873	68.7679
	20.2192	49.7681	42.7105	22.5536	34.9324	94.2658	70.5231	125.191	106.175	102.341	22.7595	21.8481	19.2162	20.9492	190.667	91.1912	28.6364	146.051	67.0649
	25.7089	57.4677	89.1923	17.0862	52.6104	107.974	163.411	123	114.473	149.356	24.25	23.2917	31.4286	24.859	167.2	85.4493	78.1111	61.9722	68.0267
	22.3625	68.9444	34.8986	19.1408	58.7101	87.7721	111.892	99.7089	125.13	167.359	22.9733	26.4304	32.4744	25.8553	214.141	22.6212	83.6892	85.8158	67.9737
	22.0845	60.7463	53.8592	26.575	26.4154	102.229	170.088	171.768	132.514	148	28.1096	25.3239	28.9848	34.493	211.246	86.7778	51.6102	41.5	64.6
	24.8909	29.481	106.662	19.8649	57.6727	64.9718	182.561	120.038	116.533	26.4262	26.1017	23.6133	30.4769	35.9231	214.115	117.041	104.797	19.5672	101.911
	23.4714	61.9692	57.0506	25.5294	44.3676	93.6351	164.934	118.671	137.093	64.7632	28.4118	26.7125	30.2821	29.2162	190.375	97.4304	83	38.1266	59.9032
	24.2931	59.25	56.3291	23.4615	80.5231	72.1754	29.9524	87.0133	45.8228	32.1791	32.8929	26.7353	28.9012	25.6212	201.11	81.8312	95.3284	95.1316	96.9231
	20.4844	53.473	32.9103	23.5395	61.625	93.8472	73.3289	125.026	29.7101	82.7193	23.9383	23.4737	31.9839	28.6753	185.125	89.629	28.0769	37.371	57.1667
	26.4359	27.6324	54.9872	9.4079	60.7632	75.375	36.5075	160.2	69.7465	110.515	29.8861	19.2308	25.7308	32.1013	194.077	98.5294	84.36	128.063	61.4474
	30.1406	56.4179	58.8026	19.7083	40.04	96.9737	92.8	102.208	103.766	65.9714	28.9167	25.3768	29.3125	29.4875	150.897	69.2875	80.0909	54.2321	73.6056
	20.6	95.3836	83.3438	25.9737	46.5694	87.1282	124.926	144.822	69.6229	45.8929	21.8154	32.4324	27	17.541	131.732	105.455	75.0864	76.1923	78.4211
	20.3714	83.7536	17.6462	24.5082	63.863	117.239	74.7286	115.065	131.145	49.8462	32.7966	16.0385	30.5846	29.0506	206.441	88.9464	112.964	23.1304	163.25
	21.1667	24.1324	18.3231	27.9254	65.575	73.6338	53	117.446	103.156	119.362	25.0526	28.25	27.1343	27.4265	106.047	89.1013	76.6964	33.1964	57.7436
	26.8286	33.8816	65.169	25.4359	72.9836	61.5125	55.5897	130.461	132.6	62.6491	16.0597	16.3382	29.9667	29.875	116.241	90.6857	69.5286	72.3377	94.4714
	23.8571	67.75	41.2059	25.2459	30.6429	111.59	133.983	119.943	104.974	53.254	33.56	24.25	25.3684	18.6849	200.987	80.8734	86.6974	23.3521	47.7463
	20.9459	61.7215	46.8286	22.942	31.1408	78.7966	70.8772	124.692	122.182	28.8205	25	26.8788	29.04	26	202.7	95.2034	79.1475	29.3559	81.2911
	26.0274	68.9394	91.1449	23.5972	24.7887	84.3671	60.4444	57.1552	98.5195	111.853	23.0897	26.7237	28.9296	25.0984	214.45	99.4286	45.7667	33.125	64.1667
	26.5676	69.5694	46.75	23.5429	47.6721	92.75	33.2949	133.324	77.2533	45.1899	27.4478	28.2778	26.425	23.9219	97.0952	40.4058	71.1194	32.3421	39.4154
	28.4138	85.125	74.6056	18.4026	50.625	84.7333	124.922	153.449	115.108	37.9324	31.0263	25.9859	29.3924	27.8205	143.221	103.366	100.982	131.588	68.8393
	33.7692	31.7105	67.9853	22.4286	24.8472	95.6515	50.924	114.136	110.814	58.1642	23.8636	29.4918	32.3333	21.85	213.195	87.5278	104.319	70.9692	74.322
	24.3562	26.3088	83.3067	22.2254	25.0156	76.3944	42.027	129.262	112.333	34.6974	24.2742	22.9831	28.88	27.0469	207.836	91.4925	116.463	35.7937	63.7069
	25.3553	69.5769	76.7455	24.45	45.3924	102.309	65.0909	106.382	128.8	74.0667	30.7857	18.4058	25.5128	23.4615	203.819	83.913	66.0513	36.6667	70.7368
	17.1594	95.3333	83.0854	24.9833	49.85	89.0588	38.2361	171.09	81.1549	81.6923	28.6061	21.2361	24.2388	23.1918	196.029	71.8136	90.7193	27.3333	60.8448
	33.1148	69.5455	87.9231	24.3288	47.4583	93.6849	81.974	136.294	158.685	63.8228	26.8592	27.5303	26.8608	23.2125	172.627	106.392	64.013	32.4648	63.2838
	16.125	64.2105	76.7051	23.5179	54.9483	95.1061	95.4247	136.52	144.852	97.6379	23.8525	27.1449	25.5658	31.7922	209.066	74.9697	50.1045	48.875	62.129
	24.7576	73.4655	45.6875	23.3289	39.6986	78.6757	72.4615	127.408	133.926	93.3188	25.7179	21.8857	23.4444	23.6522	187.318	103.231	62.3333	118.393	67.6479
	30.2949	52.6721	85.5135	21.8116	61.662	105.37	78.2051	118.886	80.2281	72.7231	17.7727	22.625	22.0128	29.0506	179.784	31.3026	84.7941	39.9275	63.6563
	25.3529	83.1594	70.6282	18.7429	56.3385	92.1538	110.085	83.4231	96.7143	46.1379	26.3472	24.7051	29.5484	23.7679	75.8	110.717	35.2647	29.3521	61.9861
	29.6615	84.7632	78.371	22.8049	44.9167	74.2532	105.557	83.95	141.897	35.2941	21.3611	27.3793	33.2647	20.6267	205.386	84.2154	73.5357	71.5362	71.1455
	22.1406	91.9706	41.9403	24.0172	51.4103	95.0571	82.3077	113.672	145.256	80.9577	20.1471	31.3205	25.9615	22.1964	198.329	97.625	119.114	62.8	70.7639
	24.4426	90.2973	32.9315	25.381	43.7193	39.0893	47.127	95.029	66.7324	123.276	30.625	28.32	26.6552	31.1618	161.162	27.7544	84.5439	18.2763	87.0746
	21.8	33.4688	38.5696	23.35	34.2	67.7969	41.5658	136.425	105.05	72.1039	19.5893	24.0909	21.8289	29.1212	187.646	118.533	70.4182	36.3718	69.6575
	28.5345	74.1447	76.831	16.5536	24.8182	105.397	92.8611	106.81	65.2055	76.2615	24.9467	24.3026	31.2973	28.1667	213.89	93.2459	33.1549	122.392	70.3188
	29.0789	39.1471	41.7069	20.8182	61.3611	69.7721	138.13	108.038	42.2055	123.41	26.7805	20.5949	28.5469	26.1899	198.32	95.975	107.806	30.803	72.45
	23.3896	60.6914	60.8939	17.1918	45.0244	74.225	86.1642	161.125	114.187	103.903	28.7246	25.4429	29.5063	25.6897	176.782	90.7273	89.4143	41.6364	38.2344
	19.2609	65.9861	83.5857	13.6962	55.9385	100.471	139.462	110.314	110.411	85.4154	30.4844	35.8667	28.9846	31.8657	213.963	103.197	49.8194	34.6316	53.8448
	20.0735	65.7324	66.9821	26.7846	65.0253	91.6364	116.328	138.333	122.552	56.3913	20.6721	25.3182	25.2787	30.675	170.8	93.8571	71.9367	42.0278	30.0811
	25.7324	52.4068	39.3544	26.7656	40.3966	82.3286	95.3043	89.6667	64.5753	78.5652	17.1528	26.3544	29.0633	20.4416	215.559	104.205	81.3117	74.1912	57.9067
	22.4821	81.7541	25.807	18.8701	52.5714	92.7792	64.1618	137.216	128.908	46.0164	18.2308	22.1733	29.5526	31.6	204	61.6203	124.547	35.3944	25.2459
	24.597	82.9474	25.9643	19.7903	40	84.0779	88.971	120.714	123.667	47.4559	25.675	17.9138	9.65385	26.7662	209.565	76.7143	90.5167	25.2667	25.0862
	24.7797	52.0149	24.75	22.2459	46.5	90.2817	51.7419	119.844	61.8462	79.7857	30.0179	19.3968	28.7	16.9744	206.957	70.8846	37.56	23.9841	57.3571
	23.8169	85.661	33.3797	22.7949	46.8214	57.5897	54.8333	139.657	65.5362	99.7288	23.1974	17.8816	19.5357	18.9359	212.885	102.014	35.5	63.2143	60.0152
	30.7632	64.0769	34.4737	21.8028	39.0462	39.924	91.0423	125.551	60.6714	35.1918	27.2319	28.9643	29.6441	26.8451	199.05	69.1282	60.2895	67.7424	112.279
	24.0909	49.4103	29.0789	21.9552	27.4688	60.6	112.621	94.7647	55.5714	40.9275	29.3377	22.7222	7.75714	26.2459	172.671	104.219	104.138	41.1864	94.4559
	23.9672	30.9028	30.9706	19.0769	30.5	36.5949	39.7714	117.61	27.7619	77.4306	15.5769	20.4225	25.9722	28.5286	210.81	94.3966	55.6071	39.4625	29.7941
	20.25	30.5652	36.7966	24.2532	57.2414	85.3607	46.3824	144.82	57.3333	100.784	25.1404	19.8548	28.3167	27.8824	180.565	96.087	65.3919	77.0685	48.7468
	25.275	68.3833	30.3151	17.4815	40.3158	89.8406	87.7222	123.361	25.5694	96.0441	25.9259	26.0897	23	20.321	192.197	90.6806	120.286	58.4648	79.25
	30.6622	89.2025	33.3425	22.339	54.7763	81.7931	113.959	49.2329	67.925	110.143	32.9672	24.6301	29	23	179.494	114.612	76.1154	50.1385	53.9545
	23.8831	92.5224	36.9167	19.1719	49.3143	76.0278	108.676	122.076	42.3288	79.3433	34.7	25.0164	24.0169	16.9385	81.5362	101.643	39.7403	58.0563	24.5634
	22.4143	89.3425	42.8438	23.4776	66.0435	79.2076	124.649	50.8	31.0294	97.5352	28.6377	27.2368	28.1455	28.1791	185.738	99.4026	32.2462	39.3784	60.2278
	23.0897	46	54.7937	15.3396	16.0921	72.918	88.3231	96.6607	73.6104	94.4805	19.7662	25.8701	19.9123	30.3939	220.143	83.0263	33.7015	90.925	61.9123
	23.1563	57.4938	71.5641	27.8158	22.3485	71.625	109.375	72.7164	45.0921	84.1233	26.2875	28.5395	23.8861	19.7273	211.137	102.988	113.122	48.4079	40.0909
	20.0143	70.2459	44.4444	15.0615	13.3	80.1781	106.506	136.208	139.57	40.6936	26.4156	21.2836	28.3607	25	181.056	31.55	83.75	71.4561	55.88
	27.7027	23.1231	56.2639	31.225	26.3699	82.1029	94.9167	101.861	27.5167	50.2222	25.7887	22.65	34.2059	28.8961	195.092	29.0351	90.6333	37.5132	53.8615
	20.3333	26.5781	79.2667	31.0656	28.0571	72.4407	46.8281	52.9403	45.0274	75.95	27.8889	21.1884	27.4211	27.2078	204.013	45.2308	26.5357	40.0132	66.0308
	25.7561	31.0735	66.9104	26.5789	20.3881	83.7826	56.8025	143.705	113.051	58.8955	29.7586	24.9167	26.5303	22.5753	152.259	52.3125	102.39	77.2985	66
	26.0294	70.4918	32.0462	44.2877	17.4154	94.1639	85.0123	56.6885	108.764	75.5424	17.6545	25.0678	25.6494	29.1515	204.478	66.5556	94.0615	76.2987	50.2857
	27.4648	72.087	83.5455	48.1486	25.6393	60.7703	66.597	146.684	48.6	74.3784	29.5211	21.9661	31.6111	26.8108	212.6	31.8421	97.7	28.141	54.3472
	31.8125	81.6835	51.0147	36.4177	17.0339	75.9867	85.0339	55.8243	37.9265	39.3797	18.5676	23.0506	22.8947	21.5	206.792	43.7089	102.105	32.7183	55.4394
	21.3571	69.4333	77.1525	41.3385	25.5167	73.8537	84.027	107.961	60.8049	75	34.8769	27.3158	32.5946	21.863	192.133	89.5789	92.6667	76.3231	101.942
	22.7091	39.3	40.4103	40.5574	21.8718	76.8108	44.5823	113.22	33.3167	68.7069	24.6667	30.1029	25.8784	25.0725	204.387	45.0847	103.839	45.8182	43.6522
	21.8276	57.3919	58.4571	38.1639	13.7949	62.6765	84.831	131.961	112.69	50.3971	32.6795	21.7342	28.44	27.7049	219.1	57.5333	83.1053	80.2692	103.293
	24.8966	41.569	31.3913	34.7733	13.6875	33.9722	79.1034	142.633	120.303	72.6438	23.4853	26.1299	28.925	27.7927	185.635	39.6053	77.8861	93.1948	69.9841
	20.0423	67.2237	87.6167	40.6622	12.6271	63.3288	57.1176	45.8816	53.3553	97.5439	32.3692	25.2703	33.6389	22.3167	214.78	30.6957	100.458	58.8214	56.3016
	17.6364	59.8696	37.2429	46.2941	23.9643	74.2533	81.7639	39.3134	45.5844	57.197	32.5075	22.1343	29.3571	27.0959	153.328	83.3571	70.4583	73.3	65.6296
	24.3766	77.2333	56.8611	45.0984	13.7895	85.8197	110.439	131.492	53.9306	80.0933	32.2623	30.5397	27.2679	21.7344	188.038	42.1552	74.2179	82.0779	64
	27.8657	53.7869	42.3919	37.8846	20.0179	74.8519	65.6154	56.5735	51.95	52.1948	31.9733	25.4545	35.2373	27.3051	195.224	82.8933	29.9538	39.339	61.1719
	24.7544	67.9344	91.2787	33.8873	12.1719	77.8986	90.1579	136.945	49.9625	89.0725	33.0429	26.026	22.95	23.4487	168.814	70.2658	61.8571	35.641	59.4306
	28.8361	61.6618	66.6984	36.4304	20.0167	58.2576	59.0897	131.932	53.0253	88.75	29.4531	26.8226	33.1282	20.5556	176.652	37.8636	98.5152	26.1304	46.7018
	27.9241	66.1286	45.1667	43.9118	19.0988	69.8333	101.968	114.639	56.1053	55.7922	23.4328	25.1646	29.6711	29.4521	214.956	67.3671	85.6364	35.25	26.9306
	25.2105	39.7571	61.7143	40.0303	21.6071	85.2394	100.433	124.387	69.5325	38.9467	24.5873	26.025	31.9221	31.9605	183.158	47.507	77.0877	41.6914	64.038
	23.2687	100.8	49.8333	38.9853	20.9836	74.6667	63.3553	133.323	58.697	76.3284	30.8514	19.7	29.4714	28.9041	155.62	102.517	92.1892	31.8261	70.8816
	30.7361	88.5513	51.6818	23.4821	18.7119	105.182	43.4211	55.7761	45.431	73.2759	30.5362	18.5424	29.3418	20.3971	197.945	80.6964	59.4937	73.2237	62.0345
	19.6203	74.7705	29.8667	43.3833	23	58.9041	86.6818	67.6154	32.0385	106.436	28.075	22.3667	25.4872	24.7971	181.897	43.3143	38.9692	22.9744	60.775
	26.6125	60.7313	23.4789	38.5263	21.4177	87.125	78	147.882	64.9589	55.175	24.7692	7.86765	30.9342	25.4133	218.565	79.3718	108.368	30.2632	64.9114
	21.3529	56.5526	76.1754	47.6418	16.6471	80.1094	119.532	117.269	46.9737	41.4167	26.6667	15.75	29.3714	25.1772	163.55	45.2597	91.0926	74.8056	55.8961
	23.4416	20.9041	35.1754	43.8182	17.3158	75.7826	62.425	142.915	38.322	52.7647	21.8571	19.3559	29.8101	29.3448	204.381	50.8553	92.8621	25.4627	71.9828
	24.1806	82.6	26.1772	44.75	25.7534	75.9324	44.4	157.292	71.1282	60.3421	28.0519	15.2817	26.5541	17.9625	187.985	70.1571	114.895	99.4933	61.1818
	28.027	86.9873	19.9315	37.6757	33.5658	96.45	59.2794	157.122	121.339	75.983	22.013	13.5541	28.6197	23.7391	219.559	81.2949	121.137	35.1481	57.5467
	20.7105	82.4675	27.1039	45.4231	19.3	105.47	66.8354	60.4487	115.287	48.5921	24.6623	27.0423	18.4833	29.45	204.75	49.8361	56.5455	43.013	56.75
	27.6296	65.9464	26.6618	31.8082	29.2813	82.7077	85.9153	135.21	42.3846	96.3433	23.2237	21.5077	25.2542	22.9333	168.974	56.1053	77.6076	33.2836	63.1358
	25.1772	73.4737	20.9474	40.0405	32.5167	67.3478	54.6753	82.9189	71.3	55.942	24.5217	11.9375	26.375	18.6812	186.391	123.879	37.1667	51.1842	67.6364
	26.2162	57.625	23.3857	58.0676	20.3934	74.4286	109.147	137.883	73.2917	73.9692	26.6197	26.5753	24.2821	23.8676	93.7833	76.5286	43.7286	23.2308	58.1892
	27.5797	94.6912	19.0649	30.4722	16.75	69.7429	63.9701	91.6102	133.352	195.817	29.8	18.8082	30.1282	27.8784	175.164	51.0517	32.3718	74.9756	66.8429
	31.1111	60.9747	39.8438	46.28	16.0256	68.6579	84.7206	111.324	40.3718	51.7375	27.8551	18.6338	25.2712	24.3947	216.453	40.2278	29.2203	33.4933	79.7632
	21.5652	61.0132	55.5538	37.5375	22.1923	77.325	210.778	135.193	71.3279	42.4478	33.05	20.9103	22.5556	16.7606	167.873	104.575	80.5125	94.8182	63.1333
	19.5357	78.9385	43.1471	39.0769	25.8955	89.4091	58.2025	126.254	116.949	52.7963	20.0972	25.4225	25.5316	23.1746	214.677	96.2462	35.8611	26.8481	51.2394
	23.2987	75.1714	18.4821	49.0986	17.1899	89.6234	47.9851	126.205	48.9028	71.8	23.3086	22.1228	29.8553	27.7385	218.127	59.1091	80.3026	30.0143	78.5606
	32.1311	72.8205	17.2941	28.4154	33.0179	94.6316	61.3818	142.519	108.797	45.5932	23.8814	26.4133	34.4412	26.1571	196.691	38.8667	94.0909	33.4211	78.6866
	36.5909	69.9024	41.825	27.5652	28.4493	80.9104	81.4091	125.691	71.7467	82.5395	26.3165	21.3766	26.4643	16.4727	165.36	58.8889	75.8116	79.6364	123.973
	32.8621	59.7647	34.1143	35.12	27.7188	81.3939	51.5593	137.828	81.3375	127.254	32.4	23.8136	28.0125	28.3881	190.894	37.1389	107.101	33.0417	114.375
	21	56.2297	33.2692	44.4861	32.5556	71.0513	93.3158	153.805	81.2716	47.45	31.7013	27.425	30.1447	22.9625	204.941	99.0278	68.6212	106.926	119.125
	22.3623	89.6034	25.4444	35.1739	18.9048	87.5526	53.0877	116.829	58.5273	89.0526	27.5455	22.8861	30.5823	19.7105	194.241	92.1714	33.0135	65.3115	73.775
	28.4727	27.1515	33.7763	40.9254	23.8136	75.4375	100.697	103.4	64.8462	95.1034	26.8052	23.7794	23.5714	15.5667	175.833	125.697	26.7625	33.5821	57.5132
	21.8966	81.2532	25.1944	48.3158	15.25	84	107.621	133.539	107.208	68.7429	27.1579	20.25	26.1974	16.8429	169.817	83.325	26.2162	74.4531	51.8167
	27.7342	75.1974	44.3429	29.1039	24.3	49.5873	78.5135	122.075	54.9315	45.9265	26.7719	16.1014	32.9844	17.1515	206.783	80.3333	22.1642	32.5844	57.4754
	32.7917	63.7361	34.75	54.0132	19.5263	74.6892	52.0441	155.025	124.025	78.4545	26.6957	25.3718	28.6119	14.6567	140.787	99.96	123.938	92.8525	128.405
	31.6923	54.8356	18.2295	27.5429	29.2167	43.0267	89.4462	123.271	122.559	43.3433	27.8286	22.6806	26.8308	33.8205	168.895	113.378	110.226	105.974	114.882
	30.5217	82.6267	20.8551	47.2297	27.7049	76.8333	48.6	118.475	84.5949	54.6389	24.6774	24.7719	30.3919	18.3014	170.357	88.1184	31.4595	24.5147	109.738
	25.661	70.6076	46.0172	46.1884	15.661	84.6316	61.8056	117.325	119.262	61.5902	30.4474	23.1304	23.1231	23.6769	177.831	62.0132	59.3509	76.641	50.386
	25.4359	28.3667	47.2833	45.8451	19.7971	61.48	68.9848	105.368	52.8718	44.5797	24.875	20.6923	30.3418	26.5513	225.45	63.8197	29.0896	70.3188	142.6
	26.661	99.9344	47.8462	56.7619	23.8125	67.0536	50.8143	116.25	65.7612	71.96	30.8358	26.0667	25.7143	20.1379	162.846	45.3214	24.7667	36.4028	48.7015
	28.1765	96.8966	48.0263	19.0923	17.473	78.2329	80.6316	160.366	59.8701	54.377	31.5172	21.4219	30.1765	20.175	184.051	99.6286	25.8947	27.5246	43.1636
	32.1268	48.375	34.8167	20.0806	20.9211	82.9821	60.9153	120.286	104.879	47.6375	18.1587	29.3671	26.197	33.6129	182.646	112.413	91.1406	66.254	64.8025
	20.65	106.75	41.3457	29.6441	30.84	64.7067	53.9625	119.338	27.9067	49.1392	32.9028	16.8421	26.8462	22.6154	161.909	93.925	78.5082	46.0286	122.091
	22.5128	95.7206	33.3088	22.9821	23.8125	64.0339	55.0385	59.3973	62.6087	48.1964	29.7231	13.5	25.6795	20.3671	197.829	64.1867	106.164	29.661	72.2368
	26.4487	28.8354	30.6567	23.25	17.4375	65.3857	54.0702	129.769	33.5588	164.64	22.3553	20.4872	31.9351	22.209	211.925	70.8831	101.508	29.2333	146.137
	33.9333	104.119	28.9107	16.8056	27.3718	75.3571	180.87	136.562	98.3043	53.3418	35.1667	20.76	25.3875	21.0725	174.25	45.8644	19.1351	111.946	125.397
	31.4571	52.5781	25.4638	23.411	31.2857	42.0556	60.3924	160.545	66.1176	40.2692	36.6866	23.3158	28.481	27.5735	102.288	71.1646	18.8571	56.0933	57.6883
	26.0448	49.4722	24.3816	18.6351	20.7903	52.25	45.9351	157.446	141.231	62.0179	35.924	21.5238	24.4875	25.5205	182.721	81.4167	19.1316	47.7973	134.91
	27.3134	74.939	51.1772	20.7385	17.1389	85.9125	70.2143	121.487	88.4203	40.5556	33.8033	22.9275	26.4051	21.5063	176.218	87.5949	24.4853	49.025	52.913
	27.5	72.9718	26.5231	20.1719	31.4769	66.859	46.1875	143.687	73.7419	78.3448	24.1184	28.1622	26.9342	23.8596	199.868	91.7763	13.6761	124.986	179.356
	26.8571	73.5823	61.4051	18.625	28.197	52.7302	87.4667	84.0984	129.081	192.987	34.7568	16.5161	22.8714	13.7794	162.778	117.448	15.3289	121	27.6582
	29.1125	30.5862	66.3125	16.1519	27.35	85.7397	206.462	114.447	78.7931	67.5333	33.4462	27.4035	36	29.6316	186.603	95.0811	22.9494	47.25	59.5526
	29	26.25	70.806	19.4557	23.4366	84.7429	75.2759	64.7361	111.5	50.4737	24.7692	22.7727	30.1688	28.4576	222.965	79.7833	11.0909	120.732	102.803
	23.8974	64.8088	68.25	17.3973	23.8676	76.3418	57.1711	113.741	84.5846	58.3699	29.4444	17.0169	28.2105	30.7089	190.377	81.4203	22.2029	60.5122	164.75
	21.1077	78	52.7273	16.5672	17.6582	68.7051	65.8378	66.1884	37.8421	61.0875	26.5714	19.2987	23.0946	24.2609	192.653	52.7813	21.6456	127.279	153.492
	29.3621	67.7538	36.5254	18.1622	30.1081	82.193	69.075	65.1429	135.64	57.5875	32.1039	21.1282	31.9063	30.3947	192.076	87.7308	20.0286	35.0667	114.703
	25.3279	92.4521	51.641	17.3731	29.2051	58.7246	64.8228	162.013	132.275	77.6623	37.1857	23.8421	22.3793	17.8289	59.3385	113.435	24.9467	124.738	121.867
	21.7949	60.9221	45.9605	23.2319	19.3768	95.7222	88.7105	112.722	49.6441	49	25.2698	27.9571	27.6333	29.9853	81.2338	107.377	15.7945	38.678	138.015
	27.2278	63.0417	15.6111	25.2308	21.4	74.24	55.5455	126.577	119.061	44.1017	30.8082	23.7297	27.4507	18.5735	177.819	67.1127	39.7619	41.2167	108.625
	23.5077	64.8219	17.5	23.2208	24.1026	88.5921	49.4138	100.278	59.1818	48.642	23.85	24.3226	23.6885	26.0147	144.883	95.4675	70.4375	141.471	72.2029
	28.1974	82.2361	18.6571	21.4412	21.339	74.7069	55.6	118.366	119.861	134.829	29.5333	22.4872	23	24.9872	189.086	96.9875	20.8875	62.1486	68.5484
	22.7162	77.3867	20.7833	23.2794	23.3485	43.2742	151.5	104.87	103.756	84.8667	25.9577	26.7424	25.3478	18.4054	173.015	97.5405	58.6622	31.082	127.693
	24.8657	60.0286	22.0678	20.5857	25.6623	70.7083	95.3226	134.65	148.228	75.0476	29.1351	22.6769	27.6111	17.4167	153.783	90.2985	62.6944	30.2464	26.4464
	24.8485	68.75	23.8846	25.2647	21.2941	100.19	86.375	91.2857	101.732	68.3793	29.8529	24.5897	31.0506	29.8966	146.783	88.5085	83.3509	120.535	171.414
	23.8667	74.0893	24.7971	22.4655	32.4643	89.058	77.3966	124.13	100.148	50.9634	27.9259	23.9322	34.8816	18.4848	175	103.648	57.2459	117.418	43.6329
	22.619	79.3051	23.6364	19.1538	30.6806	55.2787	57.5976	126.338	90.8831	32.6429	30.7692	24.3636	33.5972	23.7342	181	73.3167	72.0625	145.063	148.256
	18.7059	91.4868	23.8514	30.7286	29.5195	80.3143	37.1831	51.0862	73.678	30.5968	26.2273	24.3699	32.0952	25.931	151.676	99.6957	31.4769	118.403	55.3521
	20.2105	68.9104	19.2571	22.2414	31.9487	84.9189	34.4262	111.195	62.274	74.411	30.6486	17.5385	33.4487	23.5309	188.753	77.961	91.6286	96.662	137.32
	22.55	86.2813	29.9403	23.7215	26.859	79.9571	83.3067	92.069	71.987	63.4242	27.5797	29.7692	29.3636	30.9821	161.229	94.1833	79.6491	84.88	123.949
	21.2833	59.2254	20.8621	21.4156	32.4127	65.8421	73.1324	178.368	67.8929	89.3281	31.4	17.3396	27.3375	23.3214	172.203	93.9677	22.8158	124.25	115.857
	18.9028	71.4286	40.9167	22.8451	28.4333	74.4833	101.333	117.641	84.0976	24.039	29.4177	19.4545	26.8205	30.1013	145.958	70.8333	27.3636	42.1613	54.2667
	27.6964	90.8289	62.8214	21.493	27.7377	86.2029	28.013	132.643	64.3288	67.8947	28.5143	17.2958	31.3171	29.6094	104.811	53.7937	26.0141	53.1096	60.9825
	26.5833	79.2174	20.3919	26.4938	17.3276	106.848	76.7544	143.785	107.338	54.4267	34.4545	15.5893	25.8667	27.6667	185.143	63.64	25.4416	84.4521	77.2414
	21.0615	46.5714	52.8333	19.0345	25.9615	38.8182	61.8108	160.11	156.889	103.244	34.88	24.0132	29.7361	25.0526	184.621	62.6133	22.7586	67.9677	72.2564
	26.0988	86.3699	63.8571	19.1774	20.8491	35.8667	116.474	135.897	44.7595	58.3571	28.9836	25.6234	26.2969	18.3846	140.645	84.575	84.9	88.7432	29.5584
	18.1579	26.0526	38.0563	18.6667	19.9189	102.284	66.0286	112.481	84.5	42.0303	32.4583	29.527	31.6479	21.2632	131.676	115.514	82.8209	81.5541	123.094
	17.7391	32.4	70	21.7424	32.5088	83.6379	47.5692	160.679	69.9104	38.3433	29.6029	20.65	23	18.7179	141.587	80.0811	59.24	162.491	123.782
	23.3088	82.575	18.4474	26.2083	25.1268	79.7564	43.4242	140.429	45.4203	62.1216	28.4079	27.3077	32.6912	15.1282	173.106	105.145	26.8254	37.3099	54.6034
	15.5161	87.05	47.6933	23.7833	26.4286	65.4179	70.7333	95.4722	70.3026	60.2687	27.5333	26.5323	25.0667	22.6508	156.857	71.2414	55.7333	142.309	117.481
	21.2895	70.1096	50.0405	20.7246	26.2923	47.2152	68.4118	110.341	130.333	94.3117	28.5921	18.2113	31.8219	21.2297	69.48	56.431	54.8525	41.9016	30.569
	23.9091	87.8101	40.6	17.0375	38.0897	75.0492	107.75	88.2222	100.118	21.3286	26.3239	21.1711	21.8784	29.2568	165.823	103.661	75.9625	150.935	29.3026
	23.4462	88.3247	56.4058	20.5526	25.1692	75.3553	24.0694	146.582	47.6812	16.4267	27.6029	24.0519	28.2763	23.6667	162.41	45.3051	79.3846	35.5513	140.74
	22.5375	82.3919	32.3239	22.3944	25.9123	80.0972	17.8904	109.792	49.3333	87	26.5439	23.7105	30.0247	20.5333	204.029	101.3	39.5067	76.4308	144.677
	28.5085	61.9211	16.1034	21.9474	34.9	87.4426	97.6364	95.0857	124.921	96.3718	20.3684	28.8636	27.1538	16.3684	205.455	74.76	82.2987	126.037	91.0411
	23.4444	80.3188	35.1892	22.3284	26.125	93.7606	108.766	107.9	55.0143	114.308	26.4828	25.5091	25.8219	18.4286	182.031	115.311	79.1053	124.354	91.1207
	33.9714	86.2931	58.4615	22.0175	24.6795	68.5085	129.727	114.118	50.5	141.034	27.5405	22.9054	28.1552	19.5362	73.575	105.884	85.2581	114.879	98.9706
	33.4085	91.4746	24.1818	23.2432	22.0741	75.8718	158.052	117.803	23.1519	59.05	34.2	22.2429	25.5385	15.0667	116.062	21.0758	74.2436	83.7846	150
	45.2714	102.754	52.5088	20.5932	23.5294	65.5345	66.8333	175.975	120.25	121.183	26.28	23.4487	30.6714	21.3816	192.188	103.128	88.7368	87.027	115
	35.6301	52.64	66.5345	26.7794	22.0484	84.5405	136.403	117.215	55.3521	101.229	29.1912	24.7083	28.4118	20.6452	80.5584	37.9375	60.6379	43.1077	57.4138
	32.4133	87.625	31.807	23.9048	23.6	41.7403	114	126.434	67.8537	58.2754	32.0357	20.4138	26.8481	21.1333	165.773	112.694	47.4242	69.0781	149.295
	27.6625	89.56	28.7284	14.431	35.8571	61.6974	66.6714	131.427	129.625	30.1364	29.6949	23.2951	26.8718	19.9865	173.608	64	55.075	146.188	135.833
	35.1467	106.173	37.2254	18.0685	25.0714	82.28	33.8657	147.821	63.1724	80.2361	30.8077	19.9254	27.5606	24.8101	168.231	85.8281	78.4571	34.4133	56.3611
	33	99.5614	32.8286	26.0886	33.0161	58.0154	89.1757	54.7625	70.9605	122.274	26.4231	21.9857	26.9114	29.825	66.75	99.5976	30.8308	58.7049	62.1
	32.8472	30.2105	41.9012	22.8961	35.7121	89.6056	138.944	117.538	66.6438	62.9344	30.25	30.1169	25.3514	28.589	174.051	95.5072	66.7681	120.231	95.1831
	24.0145	26.6933	40.8481	26.2105	45.3273	106.303	70.7742	155.288	62.7821	54	16.7143	22.8033	30.5942	26.7297	62.7792	94.087	58.5634	104.607	157.143
	32.1351	58.0972	35.2456	19.1692	31.1842	81.2609	63.209	118.436	100.117	153.928	25.9692	19.9865	29.2394	29.6316	119.658	104.676	53.1829	121.6	33.4933
	28.0308	52.8194	42.5179	21.0645	17.3896	115.338	171.13	121.766	36.6582	42.9296	34.5231	19.6462	29.2568	20.9494	75.6061	94.6667	63.1563	69.1905	26.8472
	34.1067	55.5072	44.4545	21.8684	25.8136	87.7763	49	54.6066	104.772	135.232	21.4342	21.3448	26.8	24.7125	103.016	124.573	72.5968	100.403	45
	44.7541	29.5	41.7875	23.4416	30.8833	88.5443	146.904	118.162	88.7042	156.61	22.7794	20.625	26.9615	25.5385	200.696	122.529	102.754	122.091	46.8955
	33.3671	82.7164	47.9189	23.8101	19.9481	81.7429	175.256	113	34.6709	53.4648	34.175	25.6533	37.4	27.8765	161.2	105.389	62.4355	176.253	141.87
	41.4364	47.5938	22.9114	20.2949	27.9079	56.7632	60.3	153.985	107.132	48.6456	33.7059	23.1803	25.5256	22.3833	175.145	95.875	63.2586	134.342	149.754
	31.8649	45.4928	44.7797	21.925	30.4744	89.0685	55.0127	75.5811	114.644	66.8551	24.9041	27.2121	28.35	27.8553	207.483	118.568	66.625	39.3729	67.2903
	30.1194	51.1625	50.4156	18.0127	22	58.1607	75.7391	108.25	130.839	116.104	29.6167	28.3699	26.1139	17.971	134.488	65.7895	100.253	116.408	157.462
	28.4561	38.0857	35.2188	22.0192	23.5875	82.2609	130.478	125.579	124.774	117.25	18.4474	23.5932	28.3462	13.1972	165.139	85.1831	15.3704	75.4603	123.182
	30.1358	61.2405	32.5313	25.3966	25.6316	100.714	129	156.566	98.95	80.9577	20.2857	24.7407	29.36	16.2969	190.462	120	12.1385	139.727	68.806
	37.7917	25.9825	49.025	26.5224	23.7368	88.6447	90.8472	107.265	44.803	116.432	20.1127	23.4156	28.2794	29.6184	189.38	55.625	13.3038	52.0125	45.0476
	31.8354	34.9437	43.7414	20.4923	26.0517	86.3971	131.789	131.603	122.763	32.5833	18.597	20.6429	26.0133	23.975	181.678	91.2533	10.725	102.2	58.5556
	35.4533	39.873	17.6522	28.0633	28.2	95.65	36.5	132.764	86.7368	90.3043	20.5556	21.1486	22.6269	28.4231	170.793	116.127	11.9322	159.346	136.471
	33.924	45.8947	42.0435	53.6716	25.7586	57.6463	99.7429	105.711	65.6623	78.863	16.7188	26.1228	30.3276	28.5263	165.338	39.493	11.5946	146.077	63.3768
	28.7	60.4342	38.4098	43.5075	22.8596	96.5854	89	112.564	50.069	51.0411	22.3038	27.6232	29.2727	26.8621	173.082	99.4857	15.2821	79.7838	110.525
	44.026	57.5625	37.1039	41.5224	22.1316	93.5479	56.6438	104.514	30.9211	31.5974	18.9367	19.9028	33.0294	27.375	201.127	37.3051	10.963	115.257	136.265
	33.2468	36.56	17.3276	56.2623	27.0886	81.5	35.4868	61.1833	89.8621	109.235	24.1618	22.5584	31.1184	19.7313	198.805	109.947	22.5616	49.2679	50.1842
	29.4493	62.4545	14.6	82.0685	33.122	91.4533	123.734	142.526	108.513	83.6154	23.2464	23.2647	31.3729	26.2073	181.038	101.931	18.4583	104.294	155.6
	31.7541	60.9452	15.5303	47.0513	26.8025	55.9868	93.962	131.861	31.7213	67.3485	21.0313	17.3625	28.4932	30.4865	184.342	101.27	14.0779	153.696	54.0125
	29.5875	59.1579	10.4355	52.3521	23.3036	59.2373	76.2121	146.411	79.8095	41.4474	18.6184	21.3333	28.7761	17.962	182.781	36.6154	18.5143	120.59	96
	31.4444	45.6875	20.7215	56.9231	25.2468	93.7089	46.8684	135.662	105.279	119.338	19.5286	21.1216	29.2308	25.9296	170.783	124.107	18.6026	39.2895	35.5949
	42.8205	29.4545	12.7119	69.3443	19.7246	58.1375	133.635	118.961	57.3768	71.2429	21.6061	21	28.411	26.5915	193.618	73.4127	14.2375	101.973	63.013
	54.2679	57.8116	12.973	52.8676	28.8082	84.3625	81.087	166.928	49.0274	51.6493	23.2667	19.6849	27.5479	23.8	147.083	104.1	13.2373	145.156	52.7069
	23.1268	55.5	19.3968	44.6316	24.375	87.0923	58.4615	112.471	54.3684	104.309	18.5781	21.2667	26.5857	18.1111	169.375	89.7073	16.2895	125.789	54.5758
	27.9103	52.1667	14.9324	59.25	27.0519	69.2857	115.188	132.456	64.8475	134.847	20.4684	25.2985	22.4805	26.0423	145.257	108.357	11.8421	48.6393	133.721
	34.7432	66.5067	12.6104	49.0519	22.4167	84.4512	151.464	122.156	100.139	80.9571	22.1071	21.4348	22.5	29.4483	152.263	94.8158	17.6029	44.8333	106.625
	34.3636	73.6957	17.7612	25.4203	32.1842	95.2083	91.942	124.288	102.148	79.2025	23.4697	25.4265	26.4412	28.1125	82.1818	96.5467	55.5789	128.514	36.2069
	47.2716	53.4615	16.1304	69.2727	20.0411	75.3393	89.1481	112.333	101.662	30	21.3291	23.1096	27.8243	24.1282	79.1936	113.346	13.6667	38.3433	147.605
	37.6111	50.2105	18.0256	25.125	24.8684	82.1212	33.2281	128.508	62.3571	66.12	21.7164	25.1169	30.1558	19.1017	61.6418	138.175	33.1552	90.4507	67.9595
	31.8596	46.6	19.1316	54.6167	33.8289	39.7879	74.4342	157.859	73.7333	114.679	20.5733	22.64	32.5	26.7297	147.879	131.542	42.3051	88.2821	38.6207
	39.1688	52.9875	18.3235	34.0789	24.6625	76.4054	128.5	139.655	40.0147	125.444	22.6835	26.2679	31.7162	21.2025	143.667	111.079	62.8462	107.295	134.262
	39.9118	46.375	16.6806	66.4412	26.7794	87.2083	141.137	127.609	116.404	89.7931	21.4912	22.9103	32.5455	26.0156	201.872	115.056	41.8684	144.171	52.4857
	33.6795	69.0548	18.7241	25.4571	22.129	94.0167	100.068	97.1833	100.485	84.1714	18.1667	30.3671	30.8788	17.4118	152.517	87.2698	49.4118	38.1026	56.1852
	31.7368	49.0877	18.541	60.3729	26.7625	87.6538	93.0986	127.375	110.2	131.355	20.1014	26.9459	27.1026	15.3333	215.828	116.896	49.7703	45.1688	157.85
	39.2949	79.1127	30.6974	43.4426	29.4643	96.1774	149.145	47.4667	35.791	152.406	19.7875	18.4103	28.0286	13.9242	191.88	83.4493	56.0132	157.636	53.1333
	28.3729	58.9595	38.1013	40.3188	34.2778	78.6119	170.29	125.276	65.1692	65.8846	23.4821	18.6552	29.2162	25.0563	142.463	114.394	49.9286	99.2	60.0469
	34.4875	45.5246	28.0405	54.7273	17.4219	91.913	72.7222	131.914	78.8462	37.4063	20.1918	18.7273	19.6066	27.0526	156	119.154	17.0441	41.7879	49.6081
	21.2667	37.3731	21.5606	28.8182	26.9875	75.0769	42.0781	112.086	121.152	117.091	20.5538	21.3478	28.7297	24.8	189.268	98.8082	52.1781	72.5	49
	29.4231	36.1053	13.6944	24.4079	30.0563	96.3924	132.409	125.519	77.2911	49.8219	19.8462	22.6324	30.7167	32.4783	159.537	119.877	59.5692	100.733	52.4026
	33.0137	59.8548	30.4286	63.4058	21.5125	104.625	57.6986	147.924	88.2321	60.1607	20.0375	18.625	30.35	23.0794	175.118	127.343	39.8906	143.313	142.239
	39.2754	29.7353	36.5735	55.7813	29.4	94.1528	68.125	121	82.5	39.475	22.6575	12.1268	29.1111	21.4375	198.362	74.5789	40.3467	90.1875	65.5946
	42.3889	53.6389	30.3377	57.2879	30.4	89.641	44.6875	103.645	65.2778	59.6538	22.3214	23.1167	29.3	19.4833	168.57	94.5325	47.8088	66.3649	160.69
	34.0597	58.8514	21.3448	66.9014	30.6866	91.5263	67.4872	136.221	62.9868	84.6964	19.1528	19.4828	26.3472	20.641	190.42	53.1818	20.9351	133.354	50.9667
	37.8732	50.8701	27.3165	56.2031	29.1833	87.662	91.0313	110.9	126.814	133.312	20.9848	18.1867	20.5821	16.8615	186.169	83.8933	17.9744	80.1667	169.178
	31.6557	56.8289	27.1642	48.1341	29.3478	72.3836	148.538	106.113	79.2414	42.1111	24.5833	18.803	18.2344	22.5063	217.594	98.9836	56.6533	34.0678	67.6
	29.4923	38.2533	19.6129	21.2281	34	79.2623	47.5538	136.027	62.4915	132.582	28.0411	17.6875	29.6111	25.8727	181.917	78.5946	27.7297	85.5714	120.955
	30.9552	59.5156	23.2346	23.1667	22.2623	37.2319	146.288	122.342	98.9821	36.8636	25.0862	15.4079	25.5333	25.6234	177.099	99.0154	61.0741	44.2051	50.2727
	37.0147	58.1974	18.1639	51.8082	24.6964	96.6667	40.9412	107.59	138.2	175.354	23.069	16.9552	30.9839	22.3038	150.849	139.114	78.5172	172.125	97.4268
	27.3947	49.7123	31.1918	43.3467	26	40.3571	191.077	123.551	89.4167	51.6875	29.6375	19.1667	28.3553	20.0921	165.638	123.839	75.9275	124.914	146.642
	33.3333	22.3194	37.3684	61.0294	29.1184	75.2609	58.5156	121.278	62	98.8462	28.76	24.4533	33	18.9859	175.702	101.859	38.8485	51.2167	57.5
	24.2188	38.1343	16.1852	49.7059	19.8571	89.8154	111.076	132.421	144.357	56.1408	22.3099	21.5763	24.8	22.6479	173.635	128.671	93.0164	51.4333	163.778
	42.4474	55.403	26.1154	44.6316	28.5844	85.7778	63.831	131.408	37.076	59.197	22.4493	23.4306	26.1618	19.4198	167.949	74.137	73.2833	133.014	137.164
	31.4776	64.575	16.2	60.6329	18.7361	93.8169	66.9118	90.0147	37.125	59.831	23.0132	21.0308	30.0253	24.6923	128.493	97.7721	91.527	114.472	124.6
	38.9375	60.9873	27.569	57.7895	18.3889	89.4872	67.7067	101.873	101.205	104.768	19.8986	20.3286	26	26.0833	185.254	117.75	90.6164	92.2639	82.4058
	29.6795	30.0649	25.1806	50.5897	20.0333	77.4493	118.617	149.122	80.7975	111.767	27.8228	24.1026	28.1026	27.678	153.75	107.017	66.5205	42.6667	81.96
	47.6579	43.9559	26.1558	51.3108	24.1186	52.8088	126.283	96.4412	76.961	94.6618	19.8077	22.9123	30.6667	18.8205	196.577	112.983	109.211	147.143	96.9254
	35.2687	66.7143	21.4054	26.1299	21.1923	92.375	107.136	104.857	116.589	85.56	29.1029	20.8649	31.3636	20.4615	188.422	109.8	75.1786	132.737	81.16
	25.3718	35.7231	29.7679	71.2469	19.1111	39.2787	96.3684	113.829	116.949	49.803	31.7595	11.9265	21.9855	31.4211	191.097	101.542	75.6379	133.732	77.7703
	36.1884	60.1471	25.0294	72.8525	23.7937	77.069	55.3571	124.123	90	53.8214	24.5571	16.0476	26.6441	27.7975	197.056	94.2593	84.8852	132.238	43.5303
	43.8889	61.3934	39.7879	45.7581	20.0519	76.7143	58.2586	125.321	126.373	85.4912	24.1786	22.7564	29.1071	21.2237	168.421	106.191	73.2308	135.675	98.7414
	42	62.4776	22.726	52.8421	26.7941	75.5775	96.3276	150.935	79.3375	45.35	22.3857	18.7467	26.2254	22.52	171.128	81.9853	85.4194	136.063	76.2222
	41.431	37.6885	17.6491	55.5417	26.4744	79.1757	51.4167	52.75	120.605	44.0357	23.7705	17.0727	24.7297	25.4359	185.351	52.8143	76.0469	140.179	55.7143
	28.1857	37.8852	30.6094	61.169	15.1884	86.5574	49.8036	98.8276	108.949	125.606	26.6579	22.3333	28.0506	14.3134	201.517	28.1159	78.6625	129.892	24.2941
	26.15	53.5862	38.209	57.5231	29.6349	71.7692	109.065	117.232	87.0649	77.6081	21.1167	17.6027	20.2192	19.8933	181.786	104.368	54.5909	156.831	131.575
	32.2658	66.7808	25.7342	46.6892	20	78.25	140.343	115.518	130.699	109.867	21.8	21.1714	24.7797	22.0658	180.271	113.077	91.3857	72.2361	156.982
	41.7681	62.3182	29.6167	47.8028	39.8814	95.0597	87.8267	147.29	69.4328	70.2727	22.197	18.5357	26.575	26.1389	172.329	85.6571	58.4783	79.6286	57.2254
	34.7869	50.1216	31.3768	49.6269	27.7759	74.6282	122.973	106.043	66.8272	123.09	25.1081	13	20.3816	24.56	151.277	35.8816	85.2754	40.7727	120
	30.4531	47.025	31.1	24.5172	37.4426	77.5821	79.1964	129.571	133.913	78.5574	18.6875	18.1639	30.3077	27.1724	207.228	42.7458	67.962	57.8	76.7308
	44.0769	59.4516	29.5469	44.4918	23.7564	78.9028	138.256	123.918	86.9722	110.071	26.3026	14.9747	27.8289	20.3766	175.014	81.7215	76.7813	91.7647	86.5823
	39.3846	49.2456	23.0303	57.6901	27.4478	84.9474	90.4507	140.07	66.1613	66.3611	23.4342	16.7632	31.3857	26.32	182.513	86.983	12.8033	46.0328	103.554
	22.3582	49.5	32.1875	60.7215	28.3014	116.743	124.464	86.4516	91.1806	81.5309	27.75	17.2333	29.0789	27.7308	183.24	23.7576	10.7436	44.2759	103.176
	43.4928	63.9483	27	43.5965	17.7714	92.5443	74.2329	142.712	59.9697	111.513	18.7544	21.8	28.8889	26.2278	191.054	36.05	12.859	96.6429	61.8209
	39.7714	67.6377	22.1803	55.5385	25.1324	89.8667	92.9873	56.3684	72.1774	42.803	23.0256	13.85	26.8312	30.08	193.306	34.1067	14.7143	134.319	92.9014
	36.9552	75.4789	31.3611	53.5932	28.3026	108.644	124.776	109.85	133.915	78.7353	23.1385	21.8529	29.493	23.0149	176.842	50.0492	10.5932	87.569	49.1552
	39.3194	56.9	16.4	55.3421	44.7759	87.8676	48.1692	39.8816	47.9221	96.3846	25.4154	25.6579	28.5536	24.0278	180.141	31.6053	13.5065	142.737	91.1607
	45.9265	63.3378	22.5	52.7308	35.1846	54.2545	89.0147	62.8228	141.026	103.574	28.2179	22.9577	24.7215	17.6486	71.6711	36.0694	15.1216	46.8194	84.9153
	42.1692	72.0649	22.9067	69.475	48.9494	103.938	114.79	94.7922	85.8769	78.6216	19.2321	16.9467	30.1605	20.5068	162.707	97.2615	10.7667	69.5769	98.8472
	22.1818	56.0392	17.8451	20.5132	36.7838	90.6533	87.5789	113.61	85.2319	72.7	23.493	17.8462	33.7949	20.5694	179.875	83.1833	27.8986	33.9577	41.75
	34.6607	45.5443	16.0541	24.4154	36.3571	80.2881	82.3714	117.043	95.2179	29.9167	21.9559	22.6757	21.3455	18.7164	168.776	29.3699	33.9383	71.7667	56.1607
	45.8608	35.6795	33.2222	23.5217	34.7625	108.809	33.4521	117.672	107.342	88.0448	20.9538	17.3951	28.4103	14.8551	137.28	85.7848	40.0328	146.147	45.7179
	34.8689	85.197	47.5256	17.0323	30.4615	63.0635	99.0896	50.9494	85.6622	109.841	24.5231	18.2	29.0735	30.026	144.938	71.303	49.7143	78.4444	131.091
	47.4545	56.7869	35.9342	15.6563	30.2687	76.0676	124.884	111.792	103.95	68.7262	23.0746	25.9583	29.2703	28.5593	170.026	76.0886	68.6714	91.2879	97.7308
	28.6711	23.141	21.4783	30.5797	37.3235	88.5352	79.0886	99.5972	120.386	46.2167	23.3939	22.8906	27.4493	34.0984	171.041	26.194	102.35	34.2941	78.5541
	34.5303	99.0875	36.3816	25.7324	27.6618	102.767	51.9508	107.333	149.348	69.5588	24.0781	30.6216	24.9	23.6957	191.732	111.886	99.7368	76.0132	67.6761
	37.1818	47	24.7143	16.4079	34.6818	85.6933	78.75	54.7051	137.712	38.3571	21.0519	25.2353	22.7121	18.9552	160.467	41.629	111.118	64.7714	82.1875
	42.6812	49.4737	24.4714	24.3951	34.7763	87.8158	43.1455	108.424	99.5789	75.6452	25.7963	25.9649	27.3544	24.9118	172.436	62.1129	70.4675	50.1014	110.534
	26.0781	54.0794	27.3846	18.5397	35.2222	85.803	86.9516	119.562	123.348	124.584	24.4107	24.6962	28.2179	21.5238	188.078	70.127	120.946	94.2241	65.3
	29.7971	24.4167	18.7288	22.0641	20.4035	91.6575	140.077	128.779	115.182	40.2909	19.375	26.5455	31.431	28.9063	142.164	96.1266	116.103	38.3857	105.76
	32.7917	61.9733	23.36	25.575	16.2545	80.25	47.0545	105.051	99.1013	108.213	22.7308	21.7538	22.5902	25.7101	190.909	31.3846	32.9818	42.403	61.803
	34.2714	30.2817	31.3421	23.274	35.3036	76.0172	120.753	116.554	123.487	96.8696	19.1343	22.12	28.3378	19.9286	145.127	56.0339	82.8906	37.4366	87.2895
	49.2297	67.2667	21.942	32.3966	37.527	90.3286	110.485	45.381	103.779	49.6835	20.791	24.0247	28.725	26.942	176.35	63.7778	40.3548	77.2881	85.5246
	43.3472	55.0506	37.0513	18.04	40.4658	106.289	56.0617	113.809	124.153	102.656	19.6724	26.7538	30.5385	23.7975	185.754	78.0526	101.213	129.687	119.057
	39.3857	60.0455	20.6571	23.8333	43.5325	45.4103	115.721	117.321	95.1471	28	16.7429	22.641	28.5088	26.039	183.355	79.7692	36.8611	56.0877	85.5897
	30.2143	58.5439	24.8734	26.5238	33.2286	85.4931	31.7031	119.041	93.5758	88.9365	19.9077	29.4595	29.614	21.942	185.552	75.6329	76.2388	158.456	121.94
	40.6119	40.1833	23.5574	22.8375	26	66.6379	101.585	68.9	126.246	68.8082	23.7627	30.4138	26.16	28.5088	160.792	86.9836	82.9367	63.1471	82.2388
	26.6111	33.2162	31.8358	21	38.1538	61.8254	77.7162	58.95	78.5342	29.25	21.1389	28.3816	25.4675	22.3553	187.543	74.6709	95.7368	99.5286	51.2267
	35.4545	47.0133	20.1184	17.7375	51.6622	60.1625	33.9857	125.079	113.785	56.6197	14.6479	21.1646	34.6714	20.359	149.442	93.6667	67.5286	127.768	43.5692
	29.0405	79.2647	18.8947	17.4861	31.9634	93	63.9437	128.35	100.2	90.7333	23.4521	25.3158	21.9296	23.8784	154.121	41.2361	104.042	131.101	68.1
	21.4179	27.4516	15.5143	21.4487	27.8784	59.2833	103.644	130.63	78.2333	81.6579	27.36	16.7097	32.8889	24.8734	160.351	81.9459	36.3291	144.03	76
	22.7857	59	27.9012	27	23.05	81.3944	91.9615	130.733	114.882	30.0704	12.7	15.6377	26.2468	18.7308	60.5263	73.069	124.949	78.3393	69.7342
	24.92	64.9868	29.5	25.3036	59.4063	87.2623	34	56.2278	103.187	35.6557	26.3971	29.1385	30.5067	16.3974	88.6842	85.2714	99.5441	85.1579	58.4545
	23.3333	19	45.537	23.5	45.8861	104.27	40.2787	149.197	76.2833	89.4156	25.6957	27.2	32.9744	21.4462	147.44	85.1351	31.8182	98.6167	58.5676
	28.9577	40.7813	42.4359	25.7541	48.4853	74.0822	101	110.217	47.5735	73.9861	25.803	19.4247	35	26.5846	190.265	32.661	33.4444	136.853	108.405
	28.0135	65.9583	31.962	16.9016	47.5	79.6885	81.9722	120.171	84.569	29.9722	20.7813	18.3846	29.614	33.3115	105.259	103.179	79.1864	71.6081	57.3377
	29.1806	52.4286	31.3913	21.7647	23.6232	98.9828	35.0959	122.113	95.5357	33.6974	20.9605	15.0923	27.8169	23.3797	133.189	100.404	22.9268	110.812	64.2857
	43.6066	38.4915	19.0556	23.3538	47.7895	86.0656	38.1447	134.862	103.224	48.8167	29.0541	20.4625	30.6184	22.7973	191.675	54.6061	21.7167	123.397	48.2658
	22.72	77.2838	19.8228	21.5672	39.6	89.8551	55.3167	121.671	78.0513	78.0366	24.3625	24.3797	27.0417	27.9063	183.857	35.9872	29.5616	90.5897	32.7353
	21.25	22.9853	18.2703	16.6724	29.1026	95.1507	88.8148	141.864	110.492	57.0862	27.9747	22.7179	27.6234	23.013	12.9359	69.8608	76.6962	73.7049	60.0385
	26.3667	54.8472	31.0968	28.3205	35.8594	109.883	64.7069	130.375	78.8947	77.3485	28.7419	25.2759	30.2388	26.9733	191.872	52.9722	94.1127	35.8056	81.662
	28.2097	50.3333	38.6709	25.1714	25.7581	85.5789	90.0952	94.1127	123.557	96.2167	22.3559	20.1	32.1212	34.791	178.266	23.2361	95.5385	170.029	146.892
	39.6944	58.7213	35.2468	24.0633	24.5507	77.4068	108.917	136.683	61.7183	102.25	23.2576	22.0506	23.9211	27.9492	153.476	110.875	85.4	92.1071	74.4638
	32.8	50.5	22.5224	22.7377	31.443	75.4286	115.714	118.559	83.4237	44.5806	23.013	26.7971	27.3671	28.963	167.12	64.1757	95	155.983	66.8684
	24.1639	39.1486	20.9474	18.8814	24.6486	97.127	51.6825	126.929	51.7258	85.026	27.9079	25.3784	27.4375	20.8228	173.015	99.7813	71.4853	111.889	99.1094
	24.2603	17.1299	32.2973	27.8293	24.1212	91.6071	95.6538	130.571	47.7538	49.8933	26.5	26.7564	23.8529	19.8276	198.983	52.039	23.5	71.4444	37.7344
	29.987	17.678	30.875	24.5667	27.8714	83.0506	56.4342	119.279	53.4684	78.0541	23.0513	24.2899	33.9467	17.9125	197.127	73.7679	24.4444	66.7821	86.1143
	31.3333	75.5156	28.3026	21.08	17.7813	88.9634	87.1711	128.946	64.1818	91.4348	25.2879	27.4333	28.1875	34.6552	172.461	76.5224	38.2895	67.7	100.677
	28.8644	62.8056	30.1125	24.1176	20.7231	95.5205	103.529	130.395	87.9367	145.038	21.0351	19.9143	24.7013	26.4605	127.08	86.3165	96.8375	142.184	78.7619
	26.625	47.5738	29.6034	21.8108	41.8902	89.1818	161.987	99.1594	31.1333	37.5513	25.7237	25.2687	23.9231	27.2388	170.026	20.7083	96.6377	38.3134	107.785
	30.7342	68.1143	23.5385	25.4737	45.2025	82.2273	42.5128	147.649	18.7059	86.2973	25.6232	25	26.1351	29.6618	147.299	145.056	91.6129	49.3485	72.8696
	29.2	25.9167	26.4348	22.52	49.127	115.632	97.52	116.618	69.0909	90.0536	22.6892	25.6479	32.5	26.2714	66.9444	87.2055	20.2436	72.2676	69.1167
	27.7051	55.1129	41.2174	20.9221	42.4127	104.481	101.964	105.131	67.0758	72.2174	24.1017	25.7042	23.9589	14.7534	86.8462	88.0423	88.1	34.5	96.641
	15.6957	44.589	26.8448	25.5362	40.4648	94.2807	81.9706	106.194	55.3896	46.5897	24.7742	25.1486	25.2603	27.6164	168.425	105.839	75.013	154.625	50.8961
	29.2152	88.9589	24.1538	29.3607	40.0147	96.7778	52.7692	80.8657	38.7101	124.395	23.9079	25.2394	22.6389	20.8052	154.446	67.8205	85.4744	76.8219	64.5802
	26.7308	10.2319	25.6795	21.3103	39.5775	79.125	44.1875	130.688	45.9063	39.7869	19.8966	16.5362	27.5811	21.7692	192.842	106.145	70.5926	58.0984	62.7237
	28.1897	60.7321	28.7162	21.3529	29.6102	88.3182	113.258	109.319	54.8939	100.523	19.4557	25.6111	27.8462	18.9872	129.029	85.194	96.125	127.577	64.7917
	29.8197	23.2778	23.4203	25.8056	28.7027	58.9143	74.9178	144.934	44.1111	66.2192	24.2564	25	29.7143	25.9063	168.243	75.5672	38.8533	38.7432	99.2759
	33.5385	64.4237	10.9103	23.4677	34.0811	80.3582	48.9565	83.1786	79.3544	43.3188	27.403	22.6094	27.9	23.45	169.018	99.0617	83.4333	30.6	98.4028
	36.8485	36.641	10.7746	29.45	32.8904	74.6029	102.263	112.667	54.5455	90.5862	27.3418	27.6232	28.0571	24.2174	147.837	92.9403	95.2069	142.595	63.125
	32.9605	65.9589	11.0769	24.2468	33.7246	97.9839	141	101.481	64.6579	126.244	21.3333	16.8378	27.9571	15.5797	208.652	76.55	87	69.0333	61.5128
	25.4655	74.9014	8.81081	26.4932	33.0299	88.5614	64.7089	123.972	38.5211	55.8846	21.05	24.8056	30.0152	30.0526	156.564	38.7	84.4262	173.962	53.7692
	25.0667	47.7215	15.5942	26.5833	22.2308	79.4931	30.4783	118.063	73.303	26.8986	19.9487	26.0893	25.7917	13.2464	81.7414	78.1429	85.65	142.718	56.7681
	18.8889	69.5526	16.1923	16.6	35.9872	86.4143	52.2394	69.5769	43.6111	46.2394	23.2143	27.4928	29.8103	21.3276	212.711	37.1833	65.197	130.348	44.3108
	31.7432	60.9048	8.85965	31.4189	49.2429	76.8382	68.8533	122.038	39.5658	61.2568	21.9744	29.058	27.5152	20.3438	220.61	29.45	90.5167	160.84	147.319
	26.2258	21.0667	9.8806	21.2	51.2821	87.1688	160.19	140.837	38.7067	143.278	23.9	24.7385	29.0641	27.2319	165.672	76.6102	91.3214	80.8481	95.3288
	39.5571	15.6349	18.1	25.1017	42.6769	75.5352	91.5513	69.2692	38.541	81.0921	20.8286	21.8875	27.8923	22.1299	205.823	29.7838	74.6712	113.102	147.566
	28.9296	43.4756	12.2857	24.7361	25.5065	69.5345	114.473	161.966	40.8485	101.432	20.1364	28.2	24.6923	28.5072	181.299	136.64	53.6829	63.6493	99.0357
	24.6351	44.7857	12.7895	24.169	54.069	86.52	90.5806	122.292	44.4375	80.7	20.4028	29.625	34.6795	21.0972	159.391	95.35	48.026	140.278	109.016
	25.4737	21	12.1625	21.1613	18.1786	48.7246	155	66.4828	24.3235	137.754	19.875	22.1266	22.5556	23.939	179.435	82.4531	84.4211	140.164	63.2121
	27.6364	35.0571	16.2429	71.7143	30.4359	98.6349	85.194	46.597	65.6111	75.3881	21.7465	24.4545	20.9677	25.7887	145.052	43.4762	110.75	125.078	67.7429
	30.6494	31.2714	15.2987	43.7586	34.24	86.4737	104.453	91.6061	81.0923	102.949	27.4085	22.4655	27.5974	26.3929	183.574	122.725	21.9574	33.3684	66.4697
	24.2286	33.5072	13.7105	57.8611	28.5714	98.7237	147.062	144.892	60.5263	94.5738	23.5139	30.322	29.0375	21.0811	176.839	49.623	17.2329	117.569	97.5902
	31.4595	49.3559	16.9857	51.3733	20.2241	121.149	124.169	117.426	58.6061	130.951	23.3333	23.5946	27.1607	25.6974	170.76	95.2987	66.7763	43.1286	59.0909
	33.519	11.6104	10.8375	43.56	19.6389	87.8361	86.6029	110.143	82.9125	109.462	24.4	26.9437	31.2821	16.9103	196.449	75.4603	80.2857	136.8	90.6212
	29.9867	52.7903	10.0779	54.6032	61.4366	88.7077	119.744	150.785	76.1754	77.6515	24.3377	22.7215	23.8923	32.8	171.403	73.5	55.0714	115.595	47.8209
	34.0513	35.9615	14.9	30.4605	45.4143	94.0172	125.842	91.1286	94.0294	97.4521	21.7342	21.4103	30.7971	26.6974	178.628	113.614	73.3513	152.574	50.924
	22.6607	57.7703	12.8824	22.2564	37.8684	86.3704	102.077	80.5	30.5667	105.805	25.7846	28.0649	33.1791	26	179.986	104.127	84.8684	137.955	97.8101
	21.9481	31.2895	17.5974	28.7667	38.2281	80.8889	188.086	103.205	74.924	111.671	23.3562	21.8406	35.5758	30.4928	144.065	76.4286	74.4595	28.9138	40.5286
	33.4478	19.3239	14.9494	53.1154	24.7733	71.25	102	115.136	86.5082	90.2308	23.1429	23.5224	34.6719	29.859	152.918	108.866	81.9167	37.0615	95.0385
	24.2949	52.5	9.50667	60.5902	55.5556	99.3562	123.824	93.7237	54.3766	173.088	22.5556	27.6	28.1169	27.2712	184.134	62.8167	99.2933	142.786	79.5
	29.4103	38.8701	13.3239	24.9583	36.8194	84.3571	91.2597	134.049	18.4	90	19.1803	22.5179	21.5167	20.6316	201.203	66.1351	106.347	74.5513	80.4386
	30.0175	46.4143	10.5909	57.8986	34.575	108.367	75.9737	132.438	50	107.909	20.1429	20.9818	30.6429	20.8676	203.31	35.0145	100.114	31.4167	76.443
	28.2911	29.5455	13.0385	52.0938	51.025	99.6897	127.304	85.3729	50.2679	81.5333	24.6087	24.0667	34.2714	20.9733	173.74	33.803	97.2703	42.8615	54.9818
	31.9104	31.1831	11.4464	26.4429	44.3472	89.4875	129.093	103.908	13.931	67.1644	21.2692	29.5125	30.0933	25.2267	190.8	16.3117	75.9211	30.4366	81.7747
	33.7586	29.7333	11.0127	54.625	32.3284	62.7879	122.339	101.295	66.3947	112.838	21.4024	19.9868	17.4483	26.2857	141.149	20.5823	86.9851	81.4091	113.757
	24.8448	33.5692	7.75714	47.25	40.1528	87.3247	64.375	141.679	39.4667	114.368	22.6486	24.5	20.3377	26.1772	195.956	93.1311	76.5593	91.1333	74.4925
	28.359	31.7215	9.53165	44.5893	36.6936	90.7297	121.526	138.726	38.3827	108.746	21.1184	19.129	30.5417	22.0244	74.0678	23.6053	18.2133	72.2069	36.5588
	25.5075	31.1311	15.4026	52.1408	22.65	92.2	122.085	128.57	51.1034	56.9063	25.5854	29.5811	34.137	23.3205	142.429	95.4026	64.9595	75.0161	95.4459
	26.3038	26.2206	17.4143	25.7879	40.9492	70.0328	47.8947	54.2051	34.4474	107.538	21.3913	26.3944	25.2182	30.3766	188.418	28.8116	52.5753	34.8026	117.684
	34.9079	40.5862	23.8475	53.0448	33.5696	99.9538	100.094	53.375	37.0875	42.2763	29.2105	27.0149	27.1429	22.275	164.329	73.3091	75.5606	28.1356	62.0313
	19.5797	20.0645	15.7121	64.9359	42.4028	72.4265	112.235	130.882	77.5294	76.2895	24.1081	24.6026	17.9726	15.0896	156.565	82.7368	78.2609	74.7533	59.2295
	24.8101	35.9211	19.6883	49.0597	37.4026	110.987	92.5584	99.6716	16.9589	88.1231	27.6806	26.4107	30.2	26.7681	175.431	60.2857	63.0781	77.5405	89.7625
	25.961	19.5303	14.0385	25.6892	22.35	85.3562	127.554	97.679	36.2321	99.1975	20.0345	24.8033	29.0779	25.2143	194.931	58.7879	82.9189	65.3492	108.672
	27.9677	44.4568	16.9333	73.1795	49	94.6974	111.5	99.25	37.6061	83.6487	23.4605	19.4615	25.339	21.3553	129.845	14.2958	91.8784	99.0667	46.7532
	33.2727	47.0132	17.5854	48.6	25	90.7808	204.829	86.4853	66.8429	112.862	25.9583	19.8472	36.5893	18.2254	156.203	20.0435	75.9351	107.52	81
	21.5156	34.1014	14.3	48.3333	36.6441	61.3676	99.5676	46.039	94.9114	98.5	22.0286	26.2113	28.2985	17.1429	215.932	73.0857	72.4	21.6833	64.1408
	27.4937	29.52	13.7568	57.1571	35.3699	74.6338	187.206	87.8133	20.6709	186.324	25.3279	28.0909	25.3293	27.0811	147.493	44.6375	76.4156	57.9231	87.1579
	26.4655	22.4697	15.5467	54.9831	23.1014	70.8857	65.4937	128.567	78.7763	89.375	22.3846	27.8971	33.0128	25.1029	181.541	84.75	70.7879	61.6912	69.5753
	25.3026	24.25	20.4444	47.0541	42.3623	84.8485	184.241	121.833	47.25	171.492	18.8276	24.4545	31.9189	23.0759	180.542	42.5507	72.7183	92.9333	63.8082
	29.9571	19.7931	9.51471	64.339	35.0476	79.1231	68.4084	54.6607	70.0435	57.8987	24.9565	25.6625	20.4861	19.8438	203.364	78.5493	88.6133	76.6769	56.386
	36.1207	16.875	13.2838	60.076	34.2727	71.0909	43	51.0149	34.6974	166.2	23.3973	22.974	21.7027	24.6866	136.405	75.72	77.2321	60.3448	51.875
	34.6143	30.375	15.5965	73.9483	21.7903	90.6923	112	127.13	30.8472	60.6	19.6563	22.0513	26.3	21.24	190.41	87.6667	79.0513	69.3553	52.0513
	29.9265	21.9189	12.0563	31.1385	29.55	76.3421	124.753	137.167	27.8644	87.2875	22.4474	21.0533	26.3382	24.2597	172.11	29.459	73.3649	66.5574	48.803
	35.8108	44.2179	11.9643	47.9429	33.1159	88.5172	58	117.628	89.9733	38.3824	18.4655	26.9565	21.8831	28.2754	174.625	49.7206	75.5385	97.8	144.122
	24.7681	28.25	23.4262	21.9844	22.4583	100.385	92.75	107.508	26.1667	98.4557	25.3377	21.125	28.7333	27.2121	161.437	57.6622	105.024	46.961	95.3621
	32.3	48.5965	16.3158	45.8904	30.3205	92.0351	89.9211	106.675	17.962	110.792	24.2162	25.5875	30.8615	22.8734	183.806	36.875	94.1618	65.1343	38.4079
	31.1923	33.4933	16.0127	53.3333	21	68.8281	154.426	116.808	30.8308	51.1818	18.5641	25.0897	33.9298	21.8493	183.938	25.2667	98.9615	58.3051	37.2308
	32.3636	31.6026	17.1351	53.863	36.3056	52.1071	115.955	111.103	57.1538	82.4737	22.6	20.4603	32.4359	19.4938	163.246	72.7945	71.25	105.842	66.1081
	35.2436	28.4571	13.8696	51.0702	20.9298	90.9552	88.6364	75.0678	42.2949	78.6104	23.1343	21.2466	17.1053	29.3108	171.425	15.65	74.1892	63.3205	94.9828
	36.88	39.1786	14.3231	59.6667	55.8286	38.4194	69.6618	113.6	55.52	139.25	23.5738	26.9322	25.3462	20.3151	178.909	38.339	81.5902	28.5513	54.2063
	30.2879	36.9242	12.7705	22.2958	35.6897	67.1781	187.246	88.8406	38.3784	107.162	21.2656	28.4507	32.3239	28.0345	189.187	64.3117	68.9365	30.791	63.1724
	33.1558	20.8361	9.93333	52.7541	38.2073	94.8036	89.3684	66.0746	53.9583	103.209	24.3289	28.2727	26.0968	25.9494	182.54	59.2027	22.8649	36.3393	61.4
	19.6765	44.7258	16.029	18.4839	56.3538	79.5352	52.2414	105.236	40.3766	78.2615	23.9286	26.75	27.4225	28.0588	169.236	70.1356	38.5946	121.278	90.1974
	38.2656	31.1563	11.7534	19.1538	34.7969	91.038	175.225	116.466	29.6667	62.4242	20.6125	27.3902	32.25	30.4179	182.025	62.0833	60.8493	61.5571	103.311
	40.9286	25.6538	10.0159	21.0769	36.6296	80.6964	116.917	118.5	94.7975	171.086	21.5862	28.2075	31.4054	21.3289	198.415	74.6964	69.4675	126.304	112.197
	24.4068	31.662	17.0313	23.1711	32.6119	74.3382	107.793	48.6	81.4464	46.1724	20.5932	23.1159	32.0513	22	186.379	51.7083	77.4	90.5652	53.6936
	29.0156	24.3231	19.8846	23.8382	48.4853	86.9298	58.7	100.509	84.2877	91.8421	23.1475	28.8228	34.1304	25.8028	186.444	48.6167	72.0263	70.9483	52.3088
	35.2273	31.2754	11.2909	22.5441	43.1286	81.6	110.455	61.8064	81.6753	160.744	22.5443	21.2586	19.8286	22.3108	166.167	25.4247	76	90.1781	81.8684
	31.9167	22.5679	14.6857	25.623	32.9091	83.2656	91.3026	94.5128	89.7821	102.716	26.7143	21.9351	36.7544	24.7215	142	66.7213	72.1184	90.5238	98.7368
	32.1846	24.1333	12.4211	16.8667	21.2687	89.8429	143.75	108.677	111.172	95.7627	26.0649	20.0405	28.0972	15.3538	200.015	54.4219	90.8947	43.2533	85.5185
	28.2	38.7368	16.0946	25.254	25.7949	75.6795	78.7222	97.9474	39.4605	51.8553	15.5902	24.3	23.3514	33.4769	164.076	70.1625	76.8077	67.875	81.7692
	30.2535	28.7949	11.069	20.3065	45.25	117.679	154.848	104.354	89.6795	99.9848	22.519	27.6338	24.7821	15.2468	164.286	65.7385	78.1364	83.8889	96.0125
	25.7848	14.7937	18.8475	32.9221	35.6176	88.375	199.449	96.1912	54.3929	129.634	21.5513	31.9231	27.0658	24.1026	207.382	25.1077	75.2692	63.1594	88.2857
	39.525	36.5294	18.4706	29.52	33.8333	67.2375	129.39	145.59	98.3718	69.2838	25.3143	20.6212	24.3824	19.7	159.432	19.7213	92.3797	41.9836	50.7692
	31.475	34.8615	17.0405	34.5469	19.0351	104.194	48.1795	142.028	29.3784	135.537	23.6056	26.5357	29.5303	23.9706	188.108	12.3784	83.9125	93.9167	79.75
	44.65	37.2267	12.069	30.3934	33	94.6538	109.074	113.667	86.4848	181.545	22.9474	27.7333	26.974	21.6714	175.127	17.125	62.0123	78.2656	48.2679
	29.8472	21.4286	15.1552	23.058	36.0139	53.2241	99.5753	111.855	33.8701	114.857	25.1282	22.9836	22.411	24.541	74.3333	49.4103	72.3293	38.3125	54.6081
	34.127	34.5833	13.7231	29.875	40.3714	103.569	203.122	87.7867	83.4375	42.5769	22.4714	21.3333	27.2167	21.6119	209.925	51.2237	85.6	60.75	54.6462
	30.16	23.7821	12.35	26.6857	25.7424	83.9595	101.263	52.623	42.8333	95.9077	18.0476	25.3148	30.0988	17.962	73.6071	56.7121	75.0833	68.8684	101.046
	31.6267	19.0366	10.4918	27.2069	36.7179	73.2241	73.9865	115.127	42.6418	87.875	25.8289	27.8143	23.4304	22.0395	181.157	76.5147	78.3108	144.276	102.014
	31.2917	30.5484	17.4286	17.1974	45.5517	94.4026	97.3889	122.72	98.0448	187.365	29.0169	25.961	26.7975	21	184.254	17.7568	74.5143	96.678	73.7162
	33.3382	43.8026	18.0938	30.0448	51.2667	76.775	140.316	61.4306	25.791	65.3243	22.3279	23.4394	29.3924	30.0448	174.753	17.2692	68.4487	128.288	93.8056
	28.7027	37.9	11.9103	26.0385	30.7564	101.71	210.492	111.448	90.6753	87.7361	28.6133	25.6533	34.3816	24.3158	176.583	15.4308	74.5821	77.1013	91.6182
	46.918	38.8108	15.9189	34.6667	21.7595	93.4203	101.756	95.2467	39.9296	124.474	19.5507	22.6935	21.9706	27.5821	197.125	16.9306	67.8442	90.6753	84.7183
	26.1282	28.8615	9.71053	29.3291	21.0857	77.7714	86.8551	97.6667	81.4868	194.877	29.5909	17.0145	25.254	20.4821	190.483	33.9833	95.0152	63.0182	55.0417
	28.2222	30.3026	11.0909	32.1081	47.6901	66.9298	94.013	118.333	28.4478	89.9231	26.807	29.4308	34.1754	19.4079	176.132	79.7895	68.2875	84.5753	63.2208
	46.6154	13.7143	17.1972	31.3636	54.5972	75.3816	80.6615	119.756	90.3509	76.7059	23.493	22.284	27.9875	26.0875	151.429	45.7544	87.5085	83.9714	93.9091
	20.3924	32.7679	19.0125	31.942	22.5294	73.8219	155.846	106.691	54.7097	83.0779	20.8816	30.7059	29.6833	21.0256	205.262	68.7821	74.5833	53.0897	65.973
	26.9697	37.6269	17.5085	24.1594	54.0694	74.5921	127.792	106.262	95.4868	71.1846	20.9221	28.3671	29.5313	23.2836	197.603	42.1646	73.7759	85.1525	46.2692
	26.4675	36.6154	19.9014	26.7424	27.6712	77.6487	169.288	117.4	90.6377	140.545	25.5556	27.6301	27.28	23.641	64.9298	41.875	71.1467	117.308	33.6724
	23.0946	29.25	13.9394	32.1207	22.0676	80.3448	101.5	125.55	35.2439	113.611	20.5286	21.7101	22.4324	26.2857	175.386	15.6962	57.5294	130.254	83.7654
	38.3	13.0882	13.2923	20.3333	25.9851	93.8906	196.728	139.734	56.125	154.203	19.9375	16.4857	23.5758	23.1316	160.532	39.137	66.9024	122.723	48.4561
	38.8767	22.3607	14.2462	34.0508	42.5172	100.258	98.5443	139.962	82.6	89.6806	19.0606	26.3562	28.7667	16.9189	160.679	58.8289	65.6515	139.508	70.3846
	33.6964	33.7949	14.2821	22.1486	42.2877	71.3699	97.4615	91.9265	31.8243	179.593	22.5405	22.481	26.5811	23.5833	184.644	60.2679	32.8913	91.7821	85.7903
	39.1406	22.3774	12.4211	18.9412	50.4744	66.0822	153.808	53.0877	42.1724	87.5125	21.6721	21.3671	22.1034	17.1688	166.969	66.2281	66.8684	62.8831	71.4
	38.9538	21.9241	11.8158	27.9437	23.0141	97.35	112.235	122.73	45.7763	86.8312	19.6216	30.8421	29.0385	19.7808	108.183	11.9359	103.974	123.987	31.2254
	31.619	19.8621	13.4737	28.2424	26.3896	81.6936	65.8873	120.986	43.3205	140.194	24.8415	20.5965	25.2703	22.5443	168.286	15.9367	86.3333	84.5172	66.0462
	28.1096	28.4921	20.1842	27.6429	60.4474	96.5441	74.6842	111.954	87.8421	97.5125	23.3462	22.2821	26.1594	25.481	54.9605	10.7941	100.675	58.2698	91.7544
	38.3671	17.2813	10.8718	29.0833	48.8	106.857	215.643	114.529	59.1818	57.4028	27.85	24.3117	25.8667	26.359	178.643	31.8841	88.8378	89.4487	50.5833
	33.0256	36.5063	12.6579	29.662	42.197	94.7321	50.3103	97.8667	52.1268	65.5974	27.5352	25.7586	27.974	22.8333	170.403	89.5789	80.7179	47.2875	54.942
	28.2133	35.6269	13.8182	22.8636	51.6	94.875	119.243	108.825	89.8971	199.466	19.8472	27.2727	24.0132	29.4675	178.183	80.4928	63.3158	114.079	54.2105
	22.8947	22.625	9.625	34.1912	41.6329	73.9032	111.276	106.208	43.5238	44.4483	26.8784	23.0147	24.4605	25.2388	51.1379	53.6111	72.5873	91.2361	61.2179
	27.7595	22.0811	18.1216	29.4875	14.193	79.0921	210.938	94.5069	63.3014	106.639	22.6066	25.2029	28.3226	22.359	153.348	36.9643	64.7647	138.921	63.5469
	27.5325	21.0286	17.7931	24.8136	11.7308	39.0946	95.6622	52.1692	40.4706	96.481	25.9375	18.9577	33.039	21.2535	96.7705	80.4375	62.8333	127.293	51.8036
	26.3896	38.84	20.3448	35.2	14.3816	78.9079	94.3333	113.579	76.5823	197.231	26.3056	24.9298	24.4487	19.9167	55	90.541	81.3875	97.1786	57.375
	24.3462	22.9677	21.3846	37.8732	19.069	96.4328	209.526	110.054	36.1169	84.5135	17.5082	24.1429	22.5395	19.2319	158.118	83.9344	79.8852	32.8406	81.2222
	32.8987	27.1538	13.6026	33.6154	25.6875	78.75	93	95.6712	88.7284	83.6364	19.3243	24.8767	26.1351	23.0615	61.4559	33.8421	73.141	71.1833	76.5
	35.4605	29.8548	13.8387	26.9091	15.2535	64.1688	103.692	104.933	51.2754	193.462	23.5806	13.4412	29.6027	28.7692	149.299	72.1148	57.9839	35.05	44.4875
	35.3553	38.7164	13.8451	27.0606	21.1719	64.1538	113.154	122.063	82.2083	82.5	21.9286	29.2069	29.6234	17.2769	194.028	91.6622	75.6316	68.9467	53.2208
	36.924	33.0169	12.2368	29.7541	18.3077	107.397	213.321	114.75	43.5692	92	20.5616	19.807	25.1818	19.4394	142.683	29.1818	79.3056	71.3478	108.938
	40.2716	38.1475	15.8077	30.2167	15.9825	71.6724	152.986	55.28	82.6818	101.051	22.8421	29.4333	24.8974	31.3125	50.3438	70.5	75.9688	65.0423	79.8961
	26.039	23.8143	12.4133	27.9153	17.1429	99.9091	109.567	103.631	98.1467	197.356	19.7468	31.8514	27.125	17.9136	172.829	85.2253	95.625	31.7193	69.2321
	31.2623	28.2368	18.8312	27.6351	15.4615	75.5139	120.034	52.6308	94.076	139.123	22.5119	24.1351	24.6667	21.4754	154.192	63	75.9153	66	115.167
	31.2821	33.5455	20.9118	27.5875	13.5769	91.8136	112.987	52.6897	43.5479	96.8333	24.0857	22.411	25.4	20.3026	164.5	86.4737	80.3438	15.7969	114.964
	26.95	28.5135	17.5882	30.4595	29.5	76.3099	125.842	161.475	98.6579	103.263	21.8026	25.3438	30.4167	26.2239	166.762	21.1897	99.8101	22.9836	79.56
	34.3896	28.6076	14.1184	32.6282	21.4677	82.6842	54.5211	108.123	25.6176	99.8481	25.6849	19.4058	18.942	21.3117	155.4	73.3553	62.6333	76.5	76.4167
	37.125	34.2405	13.5733	33.4177	24.9189	41.5588	210.731	149.473	76.3378	111.107	17.4821	21.9189	18.5385	19.8148	142.426	80.6406	76.8361	86.629	77.2222
	28.3043	35.9818	10.5541	30.375	21	71.5195	112.644	119.776	79.2167	47.8261	22.6833	25.4615	24.831	23.4167	159.833	37.5224	101.162	19.3077	112.333
	22.6883	29.1408	12.6935	33.0667	22.791	70.3086	78.9231	127.895	59.8293	195.359	22.5357	32.038	29.0548	21.6522	167.042	80.0164	95.2838	66	82
	26.4625	29.3509	9.9875	29.9211	23.0649	77.5938	99.1356	123.62	36.05	99.6102	23.6463	24.6557	25.5195	21.3714	84.9516	32.8462	62.359	39.0159	86.7361
	28.9324	41.8462	7.74242	33.0811	13.8354	50.6724	190.829	136.851	51.8182	70.7903	19.1622	19.4921	19.8358	21.2949	64.5574	30.6579	42.4462	61.4675	70.9231
	31.3231	37.6709	8.23077	32.061	13.4058	82.625	98.95	136.868	37.5972	87.3667	20.6324	24.9756	26.8312	27.1356	82.1507	65.8923	70.3288	26.5974	45.5714
	30.5897	28.8793	9.67188	17.2833	23.9818	98.5143	121.588	110.385	85.2712	173.618	22.8529	22.4805	25.1475	25.0526	128.759	51	81.1806	58.6	139.082
	29.2105	27.7632	6.61667	17.6456	18.75	60	103.104	105.689	43.169	87.8734	23.2133	21.5395	28.9104	15.5758	209.75	66	32.3881	84.322	118.933
	23.1695	24.0759	11.2436	22.7627	20.7838	62.6622	217.741	134.245	82.7353	108.125	17.3243	23.6104	19.5441	21.5429	179.588	16.8228	73.013	55.8209	90.473
	25.2469	41.9091	9.27586	17.8608	19.6	87.9444	110.154	117.899	27.481	92.8429	24.6	26.5	26.3165	25.3167	194.971	22.1791	56.1803	20.0267	39.5385
	21.1964	28.8133	9.39744	21.75	19.0704	96.75	212.605	77.0132	18.5303	203.875	20.8718	27.8077	29.1	19.9577	177.432	35.4	29.0889	93.9437	70.8966
	28.6769	30.9744	9.52239	19.1266	19.7895	71.9138	200.319	112.366	64.6842	97.7273	27.3108	31.9254	23.4304	19.7333	184.616	79.725	93.0154	25.5405	73.5
	20.6481	57.873	13.8358	22.6552	17.1379	94.038	154.857	125.12	50.8493	196.538	20.7368	27.2895	25.8689	16.4706	168.962	83.8525	90.1791	20	67.8625
	22.4878	32.2162	12.3418	18.3333	18.5068	35.8947	228.055	91.6724	98.6571	185.89	23.1618	24.2931	24.85	27.4933	188.641	79.6923	66.6974	35.8333	80.3108
	28.0133	23.8052	10.4306	27.6769	20.2466	70.0274	104.58	110.256	93.0571	136.738	18.8356	24.679	25.2692	14.481	208.819	72.4407	97.0526	76.6623	154.261
	22.8158	30.338	14.4545	34.1449	24.6	86.2281	196.372	81.3117	75.9464	213.458	27.1639	25.8833	25.4559	24.6	193.034	80.4933	73.5	27.0886	61.4091
	24.7895	20.9821	12.3	28	14.7031	46.3623	43.1667	137.449	33.1299	92.3768	21	29.2877	22.5417	22.0339	98.9821	105.985	68.5753	37.1791	42
	31.7105	23.4366	11.55	30.5455	21.5	51.5395	70.9583	158.153	83.3671	181.863	19.2121	26.5893	31.5932	18.623	197.39	34.507	74.9091	68.8413	42.0563
	21.0649	20.7468	11.5806	31.6479	18.8857	45.0833	70.25	153.25	43.5867	38.1389	24.2941	18.5286	21.6724	16.3182	183.849	83.5893	65.2727	83.4333	146.818
	26.2125	23.1449	9.85714	37.3125	17.1429	95.0794	89.1014	112.573	35.3934	62.5775	22.2615	23.7302	24.25	21.6389	189.068	56.0556	99.7101	30.7143	77.1754
	25.7763	22.2692	6.28571	46.8	12.4478	64.9123	83.5	111.629	99.9125	61.64	21.4935	30.6143	30.2949	21.0833	77.5882	65.4058	64.4923	29.6842	102.609
	27.5854	43.6282	7.75342	27.0132	25.5797	72.9873	43.9118	136.823	38.5231	78.6176	27.7353	26.2712	28.6712	16.4474	191.333	70.2286	79.4531	23.5079	85.6066
	22.7761	19.6234	10	54.4348	15.987	79.6944	142.179	56.8971	96.8276	73.1818	24.7632	23.9211	20.3974	23.4348	188.821	23.4211	91.4107	45.76	93.6753
	25.4516	21.4746	8.63636	48.7895	22.5875	83.0746	61.791	91.8689	52.9286	37.4627	22.7215	35.5313	24.8594	18.8077	183.377	16.0395	65.375	86.76	89.3333
	18.9545	28.7941	8	23.2742	15.7375	57.5286	47.2432	136.944	99.1212	126.359	20.541	24.0357	25.0526	20.1667	201.672	61.0366	84.4211	55.0909	70.4643
	23.9744	21.1392	9.83333	49.5147	13.8451	95.0448	52.9333	159.111	62.8889	54.3636	20.6667	23.8289	20.2881	19.7368	193.097	93.1711	76.2821	60.3718	77.557
	23.6875	18.9091	8.90164	27.4125	28.3088	65.3692	48.3676	108.343	45.5156	41.7162	22.9385	23.3194	22.9722	22.0299	188.57	64.9873	68.1552	58.8889	91.3239
	23.2321	29.925	10.8375	24.3378	20.4478	48.411	59.0667	94.1091	38.2405	46.5263	20.5806	19.0933	25.7297	19.443	196.064	56.3571	85.7	67.1408	76.5694
	26.8421	27.6667	14.4737	51.2174	28.0641	93.3	69.6923	109.862	88.2667	42.7647	18.9726	23.5625	21.2658	18.8833	206.184	42.473	68.525	37.5342	72.519
	25.8125	26.2254	10.4853	59.0548	19.9855	59.425	62.6066	110.411	67.2329	53.1034	25.3067	29.1167	25.5455	18.7949	196.236	82.3729	50.038	20.2933	67.5443
	28.5065	30.473	14.3288	50.9872	23.4194	94.7857	106.279	121.244	44.2769	60.9508	24.1	30.1528	29.1486	22.8462	194.651	89.7867	82.9153	57.0694	84.2286
	25.1579	46.5625	11.2564	59.0308	25.4	54.913	70.4853	103.465	43.4921	55.3115	22.4521	21.5733	27.1772	16.7215	167.74	86.2051	86.6875	30.2658	103.81
	28.5833	50.1026	10.4407	50.0137	18.7941	71.1154	83.4286	112.654	100.652	92.4459	26.3621	29.4583	27.5085	15.3947	191.397	61.4118	67.371	58.4833	33.2278
	23.3273	27.8095	10.7179	46.95	22.6026	44.7051	79.9167	125.182	61.8644	62.25	22.36	25.5965	10.1356	27.5143	192.672	76.65	51.75	86.9559	76.9467
	19.5441	31.1892	11.7534	23.2987	27.641	50.6286	94.5128	157.946	60.5065	73.6429	24.3788	28.3088	22.3521	15.4795	182.985	67.806	57.4462	22.5325	51.9605
	21.6	18.9833	12.7179	52.7922	24.9718	86.7561	92.9706	149.831	87.0147	69.7857	27.0658	21.9403	23.5122	22.3472	183.137	77.8621	81.5513	23.8784	84.7143
	35.8816	27.5067	13.5195	19.2267	19.9231	64.3896	121.571	134.815	45.3818	83.4744	29.8082	24.5068	21.662	20.3651	205.279	55.5658	42.8	67.0658	94.6164
	25.6	42.5397	12	57.0476	32.726	72.7089	62.254	103.451	76.8158	81.5758	21.2532	29.4	27.6406	20.9655	162.258	30.2881	58.3559	54.5432	93.9359
	24.1558	25.1944	10.1333	59.1964	29.3026	45.9298	44.7667	127.187	45.2949	107.816	22.7625	26.9583	24.3247	13.7051	199.311	83.7692	8.54545	66.9054	73.9265
	25.641	28.6034	12.0746	26.9211	31.918	71.7391	31.3676	135.092	50.0946	55.2063	20.675	34.5	25.3492	22.1333	69.1475	75.0886	8.04545	27.1607	94.5897
	29.411	22.1579	14.1646	41.1552	26.5584	71.4231	52.6462	114.111	83.1594	40.082	23.8816	21.0794	21.5915	23.0946	203.635	62.4933	9.95588	62.4286	86.375
	29.7733	25.3818	10.2222	51.2933	23.5769	63.25	61.1636	105.258	45.5167	27.6377	22.9867	26.4459	26.5278	17.4054	217.358	73.7867	8.41538	29.3286	83.2568
	29.0833	13.7324	8.41667	48.2203	15.527	72.5732	52.3793	154.537	74.197	46.4308	23.5584	24.4028	26.8846	22.7813	115.709	84.1	9.4	23.9459	82.6203
	23.16	24.8971	13.3194	55.2692	17.7722	64.3731	55.5441	133.397	47.7879	55	23.9718	23.9028	29.2	16.1538	197.291	75.375	33.5541	29.2647	49.1408
	27.8625	25.3333	10	43.9538	12.9825	78.8767	150.962	111.676	82.6269	48.9412	20.3462	28.4179	25.1324	12.1818	194.276	91.4426	90.8841	63.8354	99.6441
	27.6949	38.75	12.2121	63.746	20.8974	85.2241	71.9048	63.1207	79.4478	45.2982	23.1447	26.2143	27.9385	19.1806	165.9	15.2785	75.3026	22.5857	88.942
	33.0172	23.6933	14.2727	50.8442	27.3544	67.197	195.143	70.2105	54.1571	138.844	26.3571	31.8767	25.8033	23.2	210.067	74.4625	111.767	64.3289	79.7541
	26.3472	30.75	10	57.0857	20.5065	73.4865	33.678	151.357	40.7867	64.0968	25.4035	19.7568	20.4769	23.6184	62.1169	64.1316	124.342	32.0328	59.5405
	33.2125	24.2656	11.275	24.5062	29.1515	27.6094	70.2267	117.077	39.5132	178.493	19.0152	26.3571	27.7013	11.7667	53.5536	72.1852	87.1299	32.4839	83.4783
	32.2727	14.4211	10.3625	48.2687	28.8103	86.875	53.2097	116.549	79.4921	29.5085	27.6462	30.7463	17.55	24.9625	203.583	61.6212	88.1552	67.569	106.479
	36.7342	58.3924	8.82353	50.3649	24.7833	88.4868	51.675	101.167	47.3333	62.6622	26.6269	26.6964	24.675	22.1711	189.087	86.7042	32.6491	66.8553	84.4091
	28.2029	41.9861	13.8125	29.8644	24.3091	79.2405	37.825	97.3867	48.3165	46.1875	19.1333	28.5217	24.9143	28.678	181.183	49.8592	30.7288	67.1579	90.0714
	38	21.4848	10.7059	42.6308	15.5395	76.8806	41.7215	88.6582	40.7385	45.7	19.9114	27.0282	19.9167	18.0519	175.072	11.8169	78.169	75.2105	35.9714
	50.7302	24.0127	12.4203	21.5	30.0833	100.086	50.5273	152.583	32.3973	34.0519	16.75	24.3898	25.3284	21.5614	200.949	15.9846	31.1207	63.1167	82.0548
	37.4342	25.8667	12.6176	26.1781	30.8551	77.3375	71.8333	152.915	92.1299	36.8861	19.2436	19.7931	34.75	16.3429	180.735	13.8793	97.5526	46.3378	70.5714
	29.6842	28.1754	11.8308	51.45	24.193	82.9014	81.0789	98.2877	116.364	45.3929	18.8667	23.4098	18.6104	21.6232	191.851	14.2143	55.9114	79.9351	55.1127
	28.557	25.8986	11.6866	54.193	25.5676	63.6071	35.4737	96.5714	113.143	63.1733	25.5333	24	22.5857	18.2895	89.2154	68.9063	69.5974	64.7975	82.791
	25.6308	26.0172	9.5921	67.3485	26.2785	55.0725	34.7848	112.839	77	72.7397	23.8451	30.0395	26.013	22.5	180.866	64.807	73.4776	76.7531	52.0541
	20.5584	33.2319	13.4915	12.6364	21.6842	60.5333	65.8904	104.753	79.2424	31.1795	22.6885	27.7241	17.25	22.4079	185.764	46.7397	81.2353	76.2667	43.1936
	42.1667	38.6	15.2368	19.3846	23.75	36.4605	124.632	83.5667	126.282	30.641	25.1408	24.2658	28.5584	26.7119	204.192	59.1282	114.355	30.3016	73.2
	34.9107	20.8205	13.623	46.4474	19.375	100.513	45.2692	100.808	33.2879	58.2192	25.9848	29.4697	30.5634	34.0423	186.274	47.716	74.4103	82.7975	76.913
	25.1639	27.8514	9.70769	57.8214	22.6761	85.2807	71.3421	104.149	39.9688	107.695	20.3797	24.4412	28.7436	13.8841	194.492	74.9394	71.5294	73.875	60.8861
	35.3125	25.678	10.9178	48.9	31.5082	42.6462	48.1159	133.125	72.2105	40.1299	23.3418	27.4	30.5135	22.9667	192.085	54.9726	78	54.88	51.6026
	18.1525	28.4107	14.8354	55.5063	32.25	73.8701	67.0633	104.688	69.9077	42.8451	20.5143	24.5789	26.9077	27.1017	204.154	64.8689	124.233	73.1159	60.9359
	19.5833	28.6769	10.3544	43.7436	30.8514	90.9412	43.5645	113.38	81.8052	59.2532	21.3924	25.8375	23.7541	10.8413	176.769	52.0253	79	52.1765	89.6184
	39.0127	23.5345	11.5584	33.6667	42.1429	95.4026	56.9114	86.0469	97.3279	38.5606	30.5818	26.6962	16.9589	28.0385	154.409	55.5672	54.8312	62.7625	61.459
	22	24.0533	13.9219	21.4861	22.6753	61.1692	43.3621	132.329	95.5833	50.35	26.2414	20.9859	30.0423	20.473	174.325	61.1207	18.5161	30.9091	56.3117
	43.2027	20.2192	8.89474	42.9155	23.8714	106.177	71.9211	105.301	106.091	38.2759	24.6716	20.8636	29.3684	23.9492	87.6102	11.6406	21.141	85.6027	35.5
	28.0141	15.7237	12.2297	41.4412	39.9868	93.3167	42.9344	101.233	105.695	62.8571	23.7568	26.5862	26.5263	27.7586	171.684	62.1552	77.3506	25.2568	31.3091
	37.3387	5.33824	10.6491	37.2432	42.4444	59.84	44.803	115.442	40.3947	37.9	23.9524	28.6364	26.1333	19.5077	137.333	66.525	94.4627	66.6316	25.8644
	40.1964	22.3857	11.7857	39.9853	21.193	77.9726	34.5362	53.1711	39.7759	39.0597	21.3167	21.2581	24.2462	23.1231	75.0676	63.625	39.7647	95.4603	29.8393
	25.8333	30.0156	8	51.1493	23.8333	35.6944	29.7742	52.3667	124.566	30.4462	21.3485	21.8939	23.5	20.5417	208.162	85.2647	25.3818	30.4098	42.6667
	30.5526	27.3881	15.2535	42.0526	39.8462	90.2625	49.8462	98.8	117.015	26.35	22.3333	24.7692	26.2188	15.8387	187.557	38	81.7432	63.5733	47.9583
	35.6522	15.0278	10	43.8684	28.6267	84.8904	72.1974	133.278	98.5479	44.9103	25.7183	20.2778	26.9231	21.5857	186.605	52.4918	74.4366	57.5132	36.0263
	24.6486	15.0147	9.96053	48.8101	41.5	80.6912	42.2603	88.6203	105.228	63.9041	27.1667	21.9464	27.1579	21.1757	164.822	8.7875	24.3235	26.4177	27.9697
	26.2813	26.7377	13.2	35.6964	39.5758	74	65.7571	99.5424	90.2308	61.3816	23.5844	25.3375	27.6296	22.8065	192.13	57.025	20.5556	87.9464	68.9615
	41.9103	22.9836	11.7564	44.1585	26.7119	58.8784	68.4912	89.7576	144.127	37.2917	24.519	27.4167	25.5128	22.913	174.4	63.2466	93.5077	70.5	61.2
	31.3676	15.425	8.625	33.1897	30.4189	91.1429	60.6923	98.8701	67.641	57.971	28.8082	24.0946	21.9324	26.0323	114.462	48.6944	72.0492	78.9167	129.03
	31.3768	17.3333	8.48101	16.6111	28.5676	58.5128	153.321	118.066	110.149	60.2143	22.7237	23.8267	22.8983	24.3833	200.31	16.1818	21.5333	64.05	48.5616
	27.3611	24.0789	11.4189	21.6667	29.7123	66.0938	45.6267	53.1818	81.6575	55.1231	22.913	26.9231	24.1795	26.5692	184.492	53.1818	84.8861	57.5072	65.7273
	42.2278	15.6515	13.5469	19.7097	35.3924	56.2545	60.0847	124.136	130.507	134.582	21.7733	33.0959	26.1449	18.1781	192	57.2639	23.75	56.7432	20.0896
	31.0137	23.0877	11.1646	20.1667	28.4384	63.9524	41.8286	130.25	85.541	39.3562	25.1493	19.1017	23.3273	22.5224	193.987	66.2436	28.8356	28.2639	51.6269
	35.5775	12.9877	13.5231	21.2113	37.3231	80.5375	102.377	127.949	74.6552	53.0508	23.3906	27.0896	25.3857	24.3443	194.083	39.2958	66.9231	72.6933	38.9655
	28.9605	17.0167	11.6857	24.359	35.8636	33.557	44.1667	160.926	122.521	36.7353	22.0492	21.0441	27.4684	20.5758	185.421	52.8861	77.013	90.3333	59.1607
	39.1311	28.1519	11.2456	21.2857	34.175	99.2436	34.6885	150.31	117.138	90.6833	21.2857	23.5072	29.662	20.4878	142.926	27.7286	72.4444	83.9492	27.6216
	32.4167	17.9559	12.9091	18.9667	30.4063	96.3684	97.2	112.25	85.8689	39.1077	21.6667	27.2639	24.8333	23.4776	50.4655	55.3699	80.6923	37.4286	53.0704
	32.6667	19.1833	14.1692	22.9583	25.8475	78.5469	38.4933	117.653	82.7237	30.5932	22.075	24.6197	30.7703	20.6622	167.423	12.4026	20.7164	41.9143	45.2208
	35.7167	26.6667	9.54545	35.5143	38.5256	57.4487	38.8226	128.745	95.4865	86.4844	27.1299	21.4384	26.8974	24.9273	194.74	12.9865	90.7179	59.5556	43.1636
	30.5507	18.6462	8.46154	36.4737	31.8077	80.0789	44.0833	126	84.4868	33.1081	23.0938	27.5658	24.9383	23.1447	199.455	43.6835	18.8769	85.5692	62.7564
	21.3506	29.6494	11.0133	27.5	32.6184	74.5	64.4615	102.645	102.273	33.6	20.9464	21.3378	29.3	17.5429	176.603	82.5775	21.2405	39.9552	39.6184
	34.1	14.9296	10.2807	38.3117	47.4844	72.1525	34.5667	115.284	87.7625	38.9167	21.1039	26.2078	26.125	17.1579	177.271	45.7188	54.625	72.2632	60.1622
	33.1831	18.3099	8.68421	26	30.9063	91.25	42.1579	111.028	96.9737	56.6883	28.1449	26.8448	23.2051	18.3	182.213	20.4697	69.6769	38.6098	26.3889
	50.1017	15.9692	11.1558	47.1923	34.4627	86.8824	38.9138	98.9211	129.203	30.7288	22.2754	31.3284	25.5316	21.1667	192.5	12.7639	88.3205	82.8906	71.3478
	33.6792	19.9	10.3919	34.8824	20.4737	89.4638	27.1948	77.1311	100	37.52	22.8136	25.2625	25.9722	23.338	175.643	85.0484	18.9286	40.8831	55.8615
	33.6857	19.0893	10.7246	43.9118	21.6032	94.2833	131.313	104.167	88.9853	34.8772	21.6667	30.4571	30	11.2857	192	18.791	74.6133	79.9863	57.7429
	41.4531	21.5077	18.3667	32.3378	17.2083	84.0658	75.4688	122.594	109.368	24.6883	22.6034	28.6724	19.274	16.5584	188.456	57.7414	76.0658	63.4531	52.791
	31.9444	17.3919	12.7083	40.7692	32.875	83.3729	34.05	69.3544	108.014	116.609	18.5974	22.9385	19.6286	21.6667	189.81	33.3729	16.0952	63.0877	54.0704
	38.9649	17.2025	10.4462	35.1525	34.0649	86.5862	78.7612	116.59	100.194	66.7656	22.4783	40.4487	26.5758	19.3455	165.195	74.325	63.1351	59.2807	66.1875
	41.4925	18.0533	13.1519	37.5763	26.9672	92.6786	32.6	115.145	138.894	30.1695	24.3924	25.4648	28.8276	23.75	185.677	69.0429	70.1111	79.8955	43.125
	22.1549	23.425	7.50685	40.4459	29.9459	74.7595	173.493	115.471	102.544	70.4394	15.9	31.2333	28.3472	20.6667	194.205	58.8101	73.7368	32.3824	62.1231
	32.7089	20.9859	10.8667	36.7647	38.6786	66.7867	158.732	135.836	113.393	29.375	23.9744	30.1127	27.3026	21.6456	175.507	81.726	78.6825	86.05	64.7222
	21.4364	16.5536	13.5256	47.0986	25.6203	83.0641	169.356	125.456	105.625	51.3171	21.2982	30.0933	31.4203	21.3924	197.946	25.1493	40.2973	85.1948	63.0133
	40.5536	15.2754	11.5833	36.4	66.9474	86.017	56.8375	177.847	33.4821	157.642	23.0645	25.5641	27.3968	24.0566	190.22	67.1159	46.5775	80.35	29.7813
	39.2464	20.2875	9.94595	24.9865	36.3455	62.1772	69.6494	111.75	59.1333	144.271	22.0263	17.4923	21.141	18.7246	182.049	65.0923	46.6866	67.9091	73.0364
	29.1563	17.7826	9.28788	32.0897	26.3478	69.5571	156.678	136.514	78.3513	156.22	21.9359	16.6056	22.431	25.8243	206.063	60.7869	74.7632	87.0476	62.0811
	26.4444	17.5443	11.169	30.803	27.6786	84.5125	144.699	114.821	93.9821	60.7237	21.0366	25.9833	24.9286	16.6912	187.026	30.1757	80.6212	80.1667	72.5244
	31.3167	25.4655	11.05	44.5333	54.3676	88.4138	92.0167	79.4054	92.2179	139.424	25.8281	21.9459	29.7595	21.8493	190.318	43.44	20.1842	32.5753	51.3286
	28.1692	17.0385	10.8158	55.3182	31.5694	58.6622	148.203	105.169	35.0676	129.403	20.5526	23.6081	23.5278	21.1525	159.328	57.1029	20.137	30.2459	72.8254
	30.7324	17.3649	8.92647	18.1364	41.6709	74.0556	162.315	55.8793	99.7875	80.8361	25.2459	22.2958	29.3714	28.2031	168.182	83.7069	71.7627	81.6203	58.2456
	27.5469	17.7324	11.5932	36.9825	51.2373	88.8553	163.929	56.92	110.169	136.014	23.3692	23.1111	25.9054	21.8333	197.957	67.9744	87.913	71.4571	58.8182
	21.8387	18.6462	10.0759	31.6061	46.3544	82.6053	180.243	120.308	114.833	144.607	22.4935	24.2877	28.4051	25.4051	185.418	62.5405	77.1216	81.2632	36.0169
	21.7838	22.3421	10.6207	35.6154	63.85	86.5965	167.959	108.5	118.5	147.739	16.8493	21.2794	24.678	33.3247	181.508	33.9254	81.8571	43.4783	51.1757
	28.8356	24.4932	11	47.8116	51.1667	67.375	125.657	108.589	97.9	162.392	14.8333	16.8312	31.3509	21.5205	184.618	75.7342	66.675	70.3158	54.7612
	29.125	25.8136	10.5	35.7375	58.4821	63.4912	92.5753	118.9	41.9722	153.297	21.5	22.3625	26.8154	26.9	172.206	47.8228	88.2	77.8684	57.6438
	26.8529	14.2	9.2	38.6711	26.3467	87.125	139.625	122.518	55.4487	112.309	21.5652	23.8621	29.7692	23.6081	205.896	59.7705	77.5	85.5085	29.1356
	17.7467	16.7949	8.45	46.7733	43.5833	75.0323	141.43	101.113	83.2368	81.1351	18.4203	24.0508	22.6324	24.7595	203.092	69.1711	19.2763	80.8033	26.3165
	19.7632	18.5811	10.7342	37.0345	24.1842	46.0435	161.649	59.1351	29.8875	123.375	21.8971	21.5897	26.2222	20.806	196.788	49.6774	73.9028	91.125	61.8806
	18.3714	18.6579	8.16949	37.7313	38.7101	78.8	149.729	141.422	130.738	126.615	25.9231	19.0986	27.7639	19.8649	196.967	76.8571	73.2	38.4026	56.44
	14.507	15.75	10.6897	45.3108	46.1139	84.4576	174.262	127.29	38.9848	145.356	17.5	26.7237	22.431	25.7917	188.257	82.7821	72.6197	91.8333	24.4416
	19.9123	20.6866	10.3651	41.8553	29.8525	52.1622	184.179	123.171	106.727	134	22.1912	20.8696	29.4658	37.8889	209.688	61.5385	66.0161	33.359	49.3544
	17.9138	23.0946	12.9221	43.2353	21.962	81.8824	102.092	120.474	106.813	155.919	20.4306	25.9437	20.8393	34.076	212.179	66.0274	52.9028	107.932	57.274
	19.7049	15.5735	11.5873	38.3559	49.1579	100.215	178.422	51.803	107.347	167.679	21.9545	30.8816	32.0448	24.4737	189.525	27.6875	22.5	32.8718	34.8933
	17.5	22.6849	12.507	40.527	50.859	107.125	106.215	145.732	48.25	160.297	22.5696	24.5205	26.6364	25.1519	174.25	37.7969	56.791	23.3065	72.3846
	21.1519	17.3125	12	40.4545	54.4925	69.7015	134.408	121.464	82.087	93.8861	26.859	24.4444	33.8696	26.8036	193.325	80.1273	66.7083	21.4571	67.4795
	22.0694	14.9167	9.6125	32.1034	32.8312	60.4286	185.429	147.441	116.015	121.08	25.5357	23.4091	27.2436	34.3	190.696	82.3333	54.0127	66.7121	75.3281
	20.2763	21.6125	9.66197	25.7297	53.7586	60.4	186.722	110.017	75	171.196	21.5	28.4691	24.4189	21.0149	57.9697	56.4429	55.0938	30.5556	70.0333
	20.7887	20.2063	9.01493	22.2679	67.3559	54.2785	81.6618	94.3729	89.3934	122.509	19.9459	19.8205	24.2679	25.569	150.275	62	61.8289	86.6575	53.1746
	20.2667	25.2564	10.0508	30.1392	31.7971	78.6818	84.3816	105.724	104.558	169.343	24.4074	17.2034	25.4783	25.6753	180.153	59.4324	83.6833	83.4912	53.8243
	18.859	20.0385	13.2353	26.8254	45.8507	76.8857	70.2436	96.6197	45.1	72.1618	21.7465	25.2131	27.3571	34.9351	162.534	48.4769	9.56522	53.8246	54.5179
	18.6528	18.7123	12.9178	52.5179	42.4375	72.7867	156.143	97.3382	109.948	75.4872	23.141	22.2877	28.5429	28.8704	190.672	32.8158	7.67105	56.5636	56.4688
	20.0656	27.4384	10.7083	54.8889	67.1667	80.3375	143.975	102.957	73.5574	61.962	24.9	21.9492	29.4068	37.2987	173.857	27.7846	9.31944	54.9054	71.2949
	25.56	21.7143	9.82759	41.0702	27.0875	79.0781	57.871	155.182	101.083	141.107	20.2466	22.8684	25.8987	21.4875	193.821	85.3898	6.96923	75.0137	66.625
	21.75	20.5714	11.6143	34.1176	21.2714	50.913	125.662	140.276	87.9865	129.385	20.2727	20.0896	22.5263	26.7656	179.564	87.2353	9.19403	41.2	56.038
	19.6429	12.0694	13.6923	31.4583	43.2727	56.9375	208.643	130.8	86.7922	51.0667	28.0968	23.8906	22.2533	29.1053	185.134	74.5946	7.41333	83.0333	59.4776
	18.5263	13.9483	10.8219	68.75	42.7361	94.4194	162.397	122.355	110.867	112.632	24.6377	23.7403	23.5342	21.4286	188.584	105.446	10.038	39.4304	59.1739
	21.9296	17.7333	15.1733	41.7273	60.1111	63.275	175.519	115.908	104.583	190.8	20.7778	23.2105	25.5789	29.2273	187.158	49.1667	11.5556	84.8734	57.9024
	17.9322	20.0635	11.7288	69.6842	42.6667	100.281	183.446	90.1017	56.1613	150.661	23.7595	20.5833	21.6835	31.6167	189.236	33.194	8.15493	76.8852	60.5172
	22.5909	15.9867	12.1923	52.1013	30.1899	70.7333	141.513	97.2167	76.1169	158.827	20.4355	25.0333	26.129	26.5455	187.281	72.5345	27.3333	39.2353	55.2353
	24.7361	19.0571	8.68056	38.6709	38.303	76.7297	116.971	95.1139	83.4918	166.699	25.0923	23.0649	19.8228	32.2623	164.233	101.176	30.0152	71.3971	74.1447
	20.3205	23.7632	9.73171	55.7662	42.3472	76.7679	188.375	103.416	101.654	126.342	18.3239	21.2564	25.9692	24.8077	185.797	71.4103	47.7206	94.7763	48.5
	20.7368	22	10.2027	56.1268	48.381	78.1695	178.208	96.8961	35.5135	103.522	25.5254	18.3235	28.0658	21.5424	169.507	94.5424	37.8788	97.9077	57.2034
	21.0395	19.4805	11.9872	57.1538	49.6167	58.8689	134.014	150.464	65.9221	171.597	25.3151	27.0833	27.1519	24.6087	205.718	77.52	70.3067	69.5965	54.5
	21.8228	15.8611	13.56	60.8861	27.1385	70.1622	111.643	139.926	80.3649	160.089	29.6486	23.4769	31.1184	36.6613	71.8462	86.3103	73.1385	71.8378	68.8966
	21.6154	16.6567	6.65217	49.1579	62.7595	109.879	181.441	62.0875	82.0606	116.5	26.3594	22.7432	26.2647	31.2537	87.9737	80.1528	33.9077	91.875	59.4737
	21.0676	26.0667	14.7308	53.2222	45.2692	71.5802	138.757	41.3378	81.975	104.241	25.5694	25.4306	17.0615	19.8214	218.597	44.3766	85.1622	26.7031	21.6923
	22.4603	23.2405	11.3919	47.1282	58.4079	67.3175	155.278	103.552	111.922	171.897	25.7385	20.5672	25.1026	33.7302	184.446	38.2879	46.8228	55.5641	61.0811
	21.473	12.8767	11.1974	56.7031	40.0333	88.7375	95.5949	117.268	85.525	125.11	18.0256	21.0417	25.5278	29.0986	165.809	99.5079	62.9531	36.0435	57.8475
	25.7436	11.6933	8.67241	58.6949	46.6379	45.8382	88.0615	104.614	66.0282	138.658	24.6912	22.5513	25.9265	17.4923	207.5	90.5132	56.3043	84.1695	22.5088
	20.8734	10.1486	10.6338	46.92	57.8077	57.931	92.7612	103.438	89.5	84.8228	31.4483	21.7627	22.8033	31.52	179.946	121.833	51.1034	76.9155	54.8246
	25.7821	17.1449	13.7097	51.6944	52.4872	77.2759	115.646	117.15	95.7321	77.8462	23.2051	21.2923	24.4769	29.3939	184.179	100.6	54.1475	98.5833	50.7361
	27.7875	12.4923	11.2414	49.0946	42.125	74.4872	121.328	112.611	70.92	81.5455	27.0658	25.3038	22.9545	34.0952	201.448	80.791	49.0694	57.4848	46.2405
	25.7571	16.9125	11.2241	46.7759	41.8961	52.3279	161.301	122.338	65	104.641	29.2308	21.6667	23.6061	27.3676	173.13	98.1846	21.3562	71.8955	44.0161
	18.7237	18.1944	11.8846	46.8986	61.2787	74.8308	110.25	122.634	90.4557	107.655	23.7975	23.5417	22.6901	36.6087	170.427	76.4478	25.2561	40.9012	67.5405
	27.25	25.35	18.1714	34.6081	50.1429	75.8167	185.734	102.663	83.5513	149.541	27.2188	23.971	28.2179	21.8875	206.486	73.5875	23.125	50.2658	44.2813
	32	21.3699	13.6582	49.1739	50.0125	68.4722	177.638	104.375	83.5789	96.303	22.3947	26.8382	24.9103	24.9	175.551	104.319	31.6197	32.987	63.7432
	18	18.7821	11.7848	47.4722	26.4189	88.75	150.194	94.55	84.7727	168.297	28.1129	25.0517	28.6026	19.0435	207.452	86.1781	21.3214	81.7973	61.3115
	25.6056	15.9394	13.6974	70.9726	28.4308	36.1618	136.881	114.652	89.2	160.783	27.7313	20.194	27.125	23.863	205.753	87.2	22.6909	76.0541	62.9383
	37.5263	17.5672	14.0588	51.0179	48.1509	52.2388	168.824	119.299	101.028	133.906	25.5467	22.875	27.973	26.0339	160.709	88.3768	23.8493	85.027	77.7692
	26.9143	24.1207	12.2208	54.3333	54.9474	83.3649	75.4079	129.188	91.4328	123.939	27.8846	24.7662	25.0141	24.1846	172.394	82.5455	29.9342	36.6774	54.9818
	18.6026	11.039	11.5455	50.2	60.6232	40.725	149.432	112.017	92.6111	149.72	29.3803	25.6129	29.475	35.7463	136.121	73.0702	19.2895	81.8871	68.9867
	29.5397	20.0519	12.3729	25.9706	51.7069	87.0492	108.725	109.345	101.789	66.6438	27.973	18.5733	25.7846	29.0984	179.639	66.0714	28.803	73.1449	54.4872
	26.381	19.2278	8.89189	24.7458	54.8354	84.087	50.16	119.145	101.708	133.649	26.3247	25.72	28.225	25.6232	191.473	28.5	73.1912	36.5938	56.1429
	30.8289	17.1333	12.1667	22.7541	43.6203	70.4375	113.241	119.867	121.048	96.6269	25.5758	24.1948	30.1692	25.1667	170.303	60.76	80.9412	57.321	69.3115
	26.3919	15.1231	15.1053	45.6286	57.8974	85.4342	108.646	107.205	75.2083	43.96	24.5641	20.8846	24.1127	39.0435	198.608	95.6667	72.3418	86.5857	45.4872
	17.1912	18.4211	12.5946	22.5909	19.4935	73.3636	139.462	101.987	84.0333	97.7049	25.0704	13.7069	25.4035	18.254	204.361	111.018	77.8919	60.3889	75.0132
	27	19.1216	10.8378	35.05	43.5441	59.2319	120.988	127.689	55.7879	95.4	28.9107	16.7213	19.1528	26.4737	149.135	44.5294	34.3014	79.4605	54.1139
	23.8354	11.7681	7.64474	57.2361	36.8784	85.2833	166.947	105.718	69.962	125.231	24.2576	14.4795	21.8375	21.7671	192.382	69.2785	20.5	77.9322	60.3333
	23.5278	8.5625	12.3559	52.5479	45.3947	80.8727	155.806	91.1842	27.8904	107.275	24.5733	27.5179	26.5063	23.3898	206.578	103.667	64.3377	21.5921	48.013
	21.3684	20.9275	13.0526	51.9643	31.2143	99.4722	155.754	114.207	81.6308	153.571	28.5789	23.75	26.443	27.0476	198.162	79.0704	21.7763	37.4242	58.0857
	30.2031	27.0357	10.25	22.9063	30.589	81.7069	77.5867	107.813	84.8026	141.619	23.1098	25.9661	24	33	171.971	81.4615	60.6351	21.6986	61.6234
	26.3108	20.1892	10.0864	24.2836	36.6349	76.6338	102.451	87.8919	96.7747	141.29	22.2464	21.9726	26.7027	27.6154	206.873	119.289	65.8904	24.775	57.5069
	28.9114	18.8125	12.1695	52	51.5179	91.8286	135.828	111	115.929	69.2286	19.4658	16.0339	25.7975	33.5373	160.237	98.3333	61.9333	34.2059	51.913
	31.1667	19.7564	15.6923	44.8816	29.0125	77.1786	155.017	105.151	68.193	90.4507	20.3125	23.9367	27.6944	24.2785	158.231	85.7349	69.2923	27.2581	58.0517
	32.0351	10.8718	11.72	37.6071	43.3	109.617	168.034	55.6774	99.5526	119.355	25.1867	21.1972	33.5362	18.9737	183.221	83.125	83.2208	37.6515	49.0694
	30.2295	17.8	15.1538	60.6625	52.913	47.5067	56.2785	99.806	38.1897	138.117	27.8	23.9848	26.6034	27.3718	212.76	74.3333	84.2031	51.8816	57.209
	27.0847	20.2286	11.0492	27.193	28.9286	85.0857	52.622	38.5833	28.95	150.644	24.8438	22.3421	25.6053	26.5789	191.373	62.16	81.6026	18.7869	53.3433
	24.8816	15.0986	12.4805	49.05	36.4444	91.5584	133.354	61.6795	110.206	50.9615	28.4464	18.3286	26.45	28.1791	207.212	70.9688	58.9063	41.2727	47.6066
	21.5	18.5484	9.25455	44.5405	49.2278	69.8354	182.662	110.642	32.9706	46.4756	25.0897	18.9296	22.0147	26.4394	206.646	82.1774	17.75	66	76.1842
	26.8767	13.9333	15.4655	43.4286	26.9492	103.027	144.077	113.526	127	118.231	30.0667	23.0685	24.0286	24.6364	211.772	94.6234	21.3718	31.9552	52.2459
	27.9143	14.9706	67.2639	37.4189	43.8438	68.85	136.102	99.4247	80.4308	166.041	29.3833	25.84	25.7867	24.1967	116.446	57.65	21.339	31.1558	41.3235
	27.5507	17.1786	40.4658	22.6957	39.1833	77.9855	187.452	92.6462	92.3538	128.292	26.7778	25.9589	24.2174	30.0897	157.487	87.5342	6.86842	22.3	62.5932
	27.4286	23.1975	91.6379	52.5172	51.1014	105.864	170.851	97.0806	100.987	119.81	25.4242	26.4366	27.7432	24.0667	175.932	67.3286	10.1184	27.9655	70.3559
	20.3429	20.197	57.0484	58.5	29.6724	49.2658	164.877	65.6618	84.2564	174.594	29.5926	23.2568	21.1053	31.0625	214.042	76.4359	7.28571	17.597	58.8378
	32.6053	20.5652	55.6333	19.2931	31.0946	44.1607	171.906	38.7344	112.25	154.03	33.5362	26.8983	28.2375	25.3165	206.672	85.6883	9.98592	49.6515	58.4138
	28.8382	16	53.3871	61.7375	31.2468	102.028	154.571	139.492	72.7101	148.754	24.9241	24.8684	24.0494	18.4384	164.533	58.6964	6.08475	31.8475	31.7692
	28.7183	16.5897	58.4219	23.575	59.75	79.5909	188.767	88.1071	59.8824	153.631	25.9114	25.2632	26.0429	26.7353	176.236	109.672	7.8254	23.9744	66.8088
	20.4177	9	46.5915	61.8793	24.2031	76.2857	156.947	117.923	42.6667	137.14	28.5	25.5541	30.6296	26.8611	204.521	54.9861	7.17105	25.443	43.4416
	22.3889	15.7975	56.9872	26.0154	30.4286	93.1143	90.6923	101.523	91.6232	172.667	33	20.0676	23.2857	16.4058	201.641	80.0159	9.75676	69.1525	50.4342
	29.3649	16.3333	63.7206	41.3816	61.6795	89.7468	106.472	125.829	100.7	144.875	29.7887	24.8077	22.1429	26.8276	192.649	70.8026	17.8462	27.5	65.2658
	23.403	15.0506	67.803	49.8548	30.1154	117.439	82.1724	109.211	89.9322	80.2462	26.0145	22.4667	30.0606	29.6892	193.69	97.0811	21.0667	39.8933	53.9355
	25.1944	16.7013	25.8158	37.4203	40.5968	46.9589	151.884	103.092	32.5873	93.8243	25.85	21.7121	29.1525	23.4211	196.553	96.7656	16.0533	54.1552	64.0154
	22.7805	17.8333	38.7361	32.7833	56.3056	89.4571	93.6203	104.621	101.26	72.8772	29.5513	21.2769	23.6234	20.6962	207.377	71.6316	24.8167	77.36	29.6452
	27.76	14.1167	53.9118	52.1622	54.7344	104.77	127.218	93.5522	48.7869	136.478	27.3043	27.525	23.3026	29.2208	105.344	82.2787	7.12821	55.7027	62.7407
	25.9028	12.6486	63.3276	45.5316	29.6418	91.1286	161.468	98.1389	30.8167	83.0513	25.3506	25.7949	30.8571	29.8305	181.385	82.4744	7.02564	22.7313	58.9275
	24.6719	12.3816	94.7778	15.6481	44.9286	93.5	161.038	123.598	89.4074	111.842	28.75	23.3	23.9123	22.2647	179.627	96.7353	8.78333	20.6623	51.125
	23.5949	11.9054	71.3621	13.8519	58.8182	87.6552	143.155	102.635	100.339	144.286	27.5763	17.507	28.3393	17.4912	179.35	29.8947	8.01299	31.6709	53.5714
	27.5238	14.7857	69.1842	13.5679	52.7761	93.2895	173.797	53.3906	75.8507	145.863	16.2597	29.4557	8.90164	29	176.246	68.3649	11.6901	29.0921	63.5517
	28.0541	60.5946	71.6897	48.5352	43.2278	82.7083	152.695	98.7193	96.5679	127.586	24	28.25	19.8442	24.2692	179.419	90.8143	9.93443	20.85	58.7013
	26.5325	82.3906	63.2785	20.4306	31.1974	51.3684	156.773	115.343	59.4179	155.594	36.0462	27.9394	24.7833	18.8133	78.5	84.1216	10.7647	38.303	52.3731
	32.3919	55.0714	61.8871	21.9079	41.4576	90.7887	145.675	111.643	54.9153	134.085	24.7846	20.9744	26.1818	23.6076	183.288	86.7763	7.73611	58.2951	46.6974
	22.1406	75.5443	59.6951	20.0299	48.1268	82.8052	62.6557	108.162	29.3077	141.877	25.6579	22.1071	25.7	26.5915	220.944	91.1304	9.63889	57.2632	76.0649
	28.4857	68.0351	78.1053	20.3	43.3544	88.7927	125.908	49.0897	34.2429	130.312	28.25	17.8209	24.2987	28.0923	100.033	109.574	15.6964	21.194	67.7564
	28.25	61.1765	66.6714	18.1408	38.7949	80.058	139.41	102.569	32.3714	54.629	16.1692	30.3385	24.0862	31.6935	197.25	91.3896	7.5	39.9605	53.7647
	29.5	54.7826	29.7429	21.4655	45.8533	115.761	114.692	104.405	84.076	111.692	24	26.9	26.0769	27.6582	142.314	63.1467	14.3448	17.6615	34.1552
	27.8548	66.9091	61.32	20.6176	64.0556	93.8	128.063	107.014	92.1184	124.237	22.7206	24.4658	22.7015	25.6026	174	60.6301	14.4615	45.9444	41.4133
	28.9028	66.9342	52.5238	55.1143	68.0847	65.0758	182.053	109.583	98.44	102.506	22.8929	27	21.6719	32.5513	201.3	71.7667	14.0167	22.5696	38.2687
	29.1899	99.8714	45.0972	20.5538	64.1579	100.816	161.884	80.5584	108.015	114.538	26.541	22.9737	18.2769	29.6364	183.215	66.2167	27.0128	34.68	62.5128
	28.6406	62.2059	56.3733	45.4861	47.1948	103.411	147.571	123.87	107.42	163.321	19.6618	21.8254	20.8889	16.7632	207.462	73.4868	12.2833	21.5417	55.9667
	23.0179	118.97	76.3898	42.9351	35.9429	83.8906	86.8594	120.938	32.2778	141.794	27.1081	23.0769	16.0405	31.9091	189.531	78.25	12.6197	19.5405	47.9701
	16.4035	68.35	66.0441	44.303	38.9714	57.8378	107.071	115.69	104.966	131.364	26.7143	24.6197	21.7424	27.1899	207.263	73.3036	12.0143	58.0667	50.8961
	23.8312	87.5217	55.3662	42.5217	57.971	54.629	116.258	123.661	52.6027	76.7813	27.9324	21.8909	17.0526	23.9855	196.077	88.6027	30.04	28.1538	58.0395
	24.6	72.4054	77.4167	47.6667	41.7848	77.3088	138.394	46.6849	135.478	94.7857	26.507	25.5	32.1486	24.6486	196.645	95.9605	9.0597	32.4561	67.8108
	21.9211	79.7206	66.6229	45.3235	38.2267	80.2105	82.2105	51.5758	142.797	101.164	22.8158	31.5135	20.2133	18.2338	170.382	84.3289	6.86301	21.7746	61.6795
	28.1558	68.8696	42.3103	47.5821	50.4231	102.286	132.793	110.71	38.7164	123.522	27.6	17.4262	18.2462	25.7857	177.551	47.7	13.2239	49.7857	56.3636
	28.2923	35.1406	44.5862	45.2297	42.4286	86.7875	149.085	130.753	40.3947	72.2241	24.92	28.6974	19.3333	28	168.837	101.975	12.0845	24.2329	67.942
	27.4821	60.7031	70.7179	53.6154	29.0154	80.2078	122.044	105.507	52.6667	117.672	30.4839	22.1333	17.4091	19.3205	163.282	53.3924	18.2692	23.1282	66.5658
	19.6087	82.2069	62.386	55.6393	46.2836	104.913	160.5	125.597	93.0513	133.172	27.8077	23.5432	23.4107	29.2174	183.069	73.0263	14.9559	40.2593	62.8939
	29.4028	97.5667	39.9048	22.4167	37.5882	59.9452	135.321	112	119.577	108.864	24.1184	21.7183	27.1013	21.875	197.848	74.4805	14.6207	19.8689	75.3621
	31.7273	67.8219	73.939	14.1184	20	27.9231	161.3	114.292	101.635	145.641	24.8364	27.8987	24.9565	21.0641	176.983	71.8375	11.5077	43.8101	79.625
	21.0988	66.7	48.8182	55.2059	56.7121	42.6575	127.052	109.2	105.292	119.87	19.9231	29.197	22.2069	16.1944	214.538	95.1029	11.5522	51.0366	91.5484
	19.7534	73.6316	72.4478	34.2857	27.8214	89.1786	171.946	92.1167	159.805	146.974	27.3896	24.1429	27.1081	18.8592	185.919	70.8169	13.7467	25.6053	31.3276
	31	100	68.4375	35.8852	49.0253	85.5065	153.438	100.603	138.865	112.481	26.9818	22.5405	21.7703	27.2375	182.797	25.5167	25.4789	54.0571	29.64
	21.3881	35.6866	62.493	57.9167	52.1316	38.3729	154.892	103.909	66.5593	155.514	27.4795	19.1026	24.8871	28.7632	190.907	45.5882	17.1923	29.7213	61.0633
	27.6623	66.76	71.1948	21.9865	33.3284	81.4091	145.567	103.157	97.8983	137.367	22.7941	28.8571	17.7692	29.2899	163.553	49.5294	25.1594	53.4211	40.9123
	25.3889	92.4054	62.0256	27.8971	54.0769	96.7013	126.961	132.671	107.603	137.284	26	30.5833	19.8983	19.0256	193.688	94.3544	21.7625	43.0282	58.5714
	27.5132	77.141	66.7945	53.4	44.7368	72.2462	162.305	93.7763	60.0128	130.515	29.0143	21.5467	24.3788	26.0164	211.603	61.9661	15.8406	27.0154	55.443
	25.7183	35.0857	66	25.4375	52.375	76.8571	116.885	82.9818	87.5072	110.833	24.9722	25.8955	27.3	24.9859	204.462	63.8442	16.1711	41.4	63.2625
	29.1754	97.7969	50.082	31.3582	51.9231	85.3971	138.147	109.8	33.9385	146.41	26.0962	27.6607	18.8857	18.0714	78.5152	70.1194	16.4464	20.3425	79.2958
	29.1818	107.015	80.8974	43.1538	58.1552	84.6389	97.2459	87.9737	111.345	103.089	24.8861	22.6377	28.5455	26.1875	159.636	86.0145	12.4638	16.8961	61.9103
	26.4324	52.2027	40.0132	50.3797	46.7778	82.15	70.375	102.286	55.5	120.987	18.5333	16.175	19.3026	27.36	176.513	53.4156	9.76596	26.2329	33.1333
	28.1667	84.8358	76.1538	40.4737	45.4684	88.0256	125.092	85.3333	109.758	85.2903	27.2836	24.1	15.8448	23.7848	186.034	79.8077	9.97015	21.3077	65.3898
	26.726	103.625	74.95	37.7121	39.6447	81.7595	109.785	90.076	121.512	62.1795	31.527	23.1786	24.4474	25.3077	169.85	60.2034	18.3836	20.0328	56.2769
	31.2895	53.9242	54.4684	57.5634	40.5692	126.576	114.395	110.077	146.885	110.32	22.5769	28.3506	24.35	30.5	188.887	92.8513	15.2712	21.1692	67.1892
	24.2603	75.507	72.8421	42.5645	45.1316	114.153	147.508	62.4286	86.2667	97.8769	19.7778	22.2308	26.2727	23.0641	209.395	60.6567	12.6154	23.8026	58.4167
	25.1111	66.0986	61.7857	20.0597	62.3448	68.4394	185.722	61.2344	93.75	101.403	26.0179	26.3382	24.1486	28.6622	205.681	34.0448	13.8824	45.5224	62.7051
	18.1167	106.882	22.9367	28.5526	50.2951	83.9091	173.738	56.1875	45.5156	131.661	30.1392	27.7042	25.4286	27	194.138	78.5	17.1	16.8333	69.1594
	23	35.9028	57.2727	21.3056	50.5352	92.3036	171.589	112.792	63.2899	168.595	24.9841	24.2319	21.8125	24.3421	179.123	62.3462	10.7321	34.1667	77.4
	25.1406	76.519	55.2692	19.6575	53.1026	104.754	134.646	106.416	136.644	160.898	23.9865	28.7231	22.0375	23.6974	150.574	92.3684	11.3836	35.5781	73.1053
	23.3934	73.8077	35.0455	18.85	41.9857	84.7419	151.136	117.368	114.329	153.973	25.129	26.5946	20.2969	30.209	171.49	72.9643	12.88	28.7544	55.2987
	21.7538	76.3919	71.275	23.2466	51.6712	109.309	171.311	150.39	98.9875	121.646	25.2903	19.4925	22.7436	29.5974	185.804	75.0128	25.8333	33.4394	77.3824
	24.2432	64.6	109.277	19.7286	31.4512	107.846	153.19	122.69	33.2	134.682	25.2031	22.4054	25.1406	18.8704	165.873	83.1408	23.3784	66.1618	55.9242
	29.0513	57	56.9828	25.2029	41.5694	89.3	179.103	70.05	81.4872	152.452	24.1392	24.4211	19.1846	26.2754	177.914	97.8841	18.3134	38.0877	63.8571
	26.5294	79.8608	51.0909	25.4706	58.4	81.3478	155.215	118.667	89.254	135.644	29.2807	18.9846	25.3387	24	193.075	99.2121	27.8	71.4429	30.4032
	21.2982	81.6071	54.6949	28.35	25.3684	101.96	129.436	124.542	132.803	159.32	31.1781	23.527	28.1	25.3973	164.172	76.6104	15.2537	37.9	74.2
	24.0308	27.4333	58.3485	42.6835	62.7391	88.3293	148.014	80.3103	71.1081	139.519	23.9861	17.9872	25.7714	23.4576	178.014	58	13.6119	81.7333	85.3797
	30.3	81.2609	49.0455	52.5797	53.3	87.7719	181.536	136.56	133.823	114.468	31.5806	28.1	22.2468	16.7342	112.133	79.1964	12.7125	18.8553	42.3433
	25.7922	81.6515	72.6812	45.5513	61.4737	78.8442	54.1013	138.343	117.487	132.068	24.0556	20.1724	27.1515	29.2167	199.646	82.7222	8.90769	42.2432	30.5606
	25.45	32.8657	28.0167	46.0758	62.8448	114.821	72.1639	107.925	64.3235	164.174	29.1724	23.7121	25.4857	20.9595	205.75	60.425	21.0548	38	50.4776
	23.0864	74.4	68.9875	20.8158	67.3623	86.1111	117.362	136.123	104.862	47.7089	26.7179	23.2714	22.3582	29.7722	186.678	31.597	11.8784	44.1538	49.6835
	24.0313	63.5625	91.475	41.8875	53.5417	110.049	149.111	89.6522	99.7051	62.3279	25.1493	30.7719	21.9559	25.4179	196.523	55.2973	15.1605	54.8246	61.8194
	27.8608	67.0847	56.1781	58.7	75.5132	80.8205	163.303	138.597	146.525	103.667	30.7627	19.0141	21.8308	26.2727	207.474	55.0179	15.4828	65.5	55.3167
	28.0317	105.128	117.361	45.6567	60.3621	36	63.4688	119.733	126.137	133.488	19.1	25.0536	23.7273	28.45	198.13	70.6623	12.1857	32.9123	69.6897
	24.5875	77.5696	27.2361	21.8933	47.1216	99.0317	78.3243	121.558	43.6364	146.594	22.75	24.7089	20.1	26.6	114.256	89.4416	8.85714	75.1341	63.1429
	24.4103	90.25	41.7722	49.5833	68.4355	101.818	111.734	147.607	70.9583	55.9844	27.3273	27.3506	27.2055	23.7895	157.963	71.481	9.01299	117.625	72.6026
	19.3919	55.9571	53.875	51.6071	44.6154	52.6375	151.829	131.343	32.6133	68.6	18.1159	25.9	22.519	31.9873	182.764	61.9733	9.33846	49.8833	44.4
	24.8361	27.7805	73.4545	44.8182	57.3692	101.706	128.923	64.5732	109.657	98.8077	22.9063	20.8116	25	26.7288	185.141	62.2286	12	34.9836	40.8333
	21.9872	92.4426	77.8261	46.5641	28.6579	89	166.974	124.786	143.461	135.066	20.4493	17.2941	17.5	27.7353	189.188	93.3014	17.1282	71.9032	44.8961
	22.8852	30.1452	78.5063	44.3333	49.3896	84.8814	171.919	163.653	117.464	114.295	27.2083	18.9531	22.3929	19.9167	202.671	90.5	23.1364	64	54.3333
	25.8421	93.5345	65.3462	43.875	43.2985	97.2099	164.982	54.9706	143.467	150.811	24.0946	18.2027	24.8833	30.1467	133.938	59.141	12.6716	22.4821	41.6825
	21.6203	92.2931	84.4107	48.1282	81.4068	92.1912	95.8421	125.97	157.986	151.432	23.7867	21	19.2813	23.7639	205.932	92.8667	16.0132	72.2603	60.3699
	23.1389	84.0333	50.6833	51.4167	31.6538	86.9872	132.392	123.339	49.15	150.782	22.6447	24.4342	25.9831	18.1667	194.153	77.0886	16.5303	73.8333	87.2933
	23.3393	31.1406	60.5641	35.5658	39.1096	100.763	109.684	125.656	82.1404	84.8611	31.6761	24.5769	23.6164	20.7342	192.333	40.8481	14.807	83.7213	50.8
	24.8378	75.5	68.7222	36.3529	64.1803	73.6579	98.1918	140.2	61.7903	117.5	30.4366	26.9839	20.679	23.0488	58.9242	76.1286	15.4267	84.8667	77.3594
	21.4143	96.6833	72.6571	19.0156	73.8961	95.3151	81.0541	155.403	87.8462	96.7403	27.1067	28.127	19.0897	23.5217	179.923	66.6707	17.3457	35.8475	53.9
	22.1806	71.7941	68.2133	13.0984	60.1061	108	151.446	106.14	69.9589	86.0139	25.2051	22.2571	31.5479	31.7759	203.026	80.9041	12.2326	35.6479	55.9706
	17.0656	62.1974	78.274	17.7439	61.7162	78.4177	179.957	125.855	167.806	70.0417	22.8806	21.5286	24.3974	23.5625	167.525	54.725	17.4068	94.4483	80.3433
	29.6102	47.4426	82.1091	12.7581	48.0441	92.4828	111.982	120.661	124.757	135.482	27.0847	22.2632	19.2059	27.0625	182.895	46.6625	21.725	29.3134	42.6267
	15.3571	71.1467	21.2239	21.4286	71.4333	86.2987	173.5	129.8	120.848	160.913	27.5714	26.7705	18.087	28.3125	206.319	67.2949	13.0615	29.6351	42.3276
	21.3421	60.4118	70	18.6029	30.3333	79.3692	154.217	71.697	74.8852	98.9464	27.5397	20.1447	18.9615	24.9524	187.969	50.9028	13.9067	67.4643	86.9296
	22.1846	66.1644	62.4923	20.2632	36.1216	88.9167	190.328	122.974	89.2754	155.712	19.7869	25.2586	18.1692	29.3529	177.816	47.5345	11.2121	32.7237	67.7429
	22.5641	82.6329	78.2121	17.2632	56.8919	92.6456	202.439	122.559	127.221	137.934	29.7692	27.1194	17.4667	25.3056	190.846	58.2432	16.2466	85.4035	64.0725
	18.8684	66.5513	72.5	24.1884	63.7162	112.86	209.087	129.438	77.0135	171.19	21.1333	28.169	12.5397	26.3289	185.908	67.6197	19.8676	31.7869	56.7813
	22.5143	72.1765	97.9286	18.6986	28.0299	94.5063	178.372	130.724	116.375	187.304	28.5077	15.7375	10.4143	28.7568	211.117	46.8448	8.86667	95.1392	82.1304
	25.7188	26.6984	60.5694	23.2632	41.6111	90.1667	144.143	116.61	76.6875	193.414	19.4156	28.8857	13.8056	19.6111	69.8167	57.3158	18.6	70.3088	33.0357
	22.3974	29.1964	53.25	19.2105	68.8592	91.4375	171.2	143.415	86.0714	165.416	23.6452	24.0159	13.9	23.7681	225.586	49	17.9872	25.3729	56.0267
	26.5132	80.9861	60.2667	15.8354	65	72.9091	199.492	126.587	140.933	127.681	27.5893	27.6538	18.8814	20.96	173.152	59.15	14.8793	38.0676	32.3288
	21.7705	27.0746	55.2179	17.0694	72.8769	83.1579	205.282	114.488	84.2025	154.103	25.0972	28.1818	17.3115	22.6579	197.827	43.9079	16.3194	17.8	55.625
	21.8235	62.8333	89.8438	15.9032	65.4079	74.5926	99.6522	108.338	144.313	181.5	27.96	24.9167	15.7937	24.0125	132.097	64.2321	17.8052	58.7105	54.4085
	28.9833	66.0923	35.2174	18.7662	65.2532	59.987	179.103	107.377	51.7273	192.487	31.5714	28.3099	25.8841	22.7031	198.429	74.3968	19.0526	18.8205	68.3462
	22.2667	68.1818	78.8824	16.7067	52.8289	37.45	73.3067	147.268	159.62	88.1304	29.2105	27.2857	16.2361	26.8194	193.4	85.9286	20.7727	41.5571	29.4308
	26.0323	76.0625	61.8462	21.1613	51.7945	68.4865	101.116	102.736	140.684	162.61	23.9722	25.1864	22.9444	19.5676	183.204	66.8108	20.7627	120.102	75.9153
	22.5938	41.6875	68.6944	15.3562	57.4138	81.5588	122.632	109.344	97.9865	63.7532	24.8429	31.6563	22.7429	21.1471	203.458	63.1	13.5625	69.411	87.6316
	21.6119	64.8064	26.5	18.7656	67.1385	104.606	193.291	96.7077	123.158	89.2571	30.2281	23.2333	21.3043	33.8254	197.8	38	16.9275	26.0897	60.8793
	25.6351	22.5484	61.4805	23.6441	26.5147	81.1081	89.0548	125.233	130.273	108.868	28.8205	27.5286	19.6486	28.0649	137.205	40.4638	23.4795	62.2973	59.9359
	15.3448	29.3385	40.2373	17.1343	55.9605	97.0893	129.114	126.344	128.541	172.772	27.2308	24.9143	23.3867	27.8615	190.493	61.9661	16.9821	123.909	40.7538
	19.2581	96.1228	59.1304	19.1017	54.0145	66.8784	133.123	140.369	153.9	79.4521	22.9265	21.6974	18.4875	32.7538	209.541	48.6341	13.9153	30.3438	58.0769
	25.6087	68.2923	35.411	18.9403	37.6849	83.16	98.5854	146.529	113.229	114.772	23.7975	31.6866	17.1711	27.4085	196.897	60.9375	14.7121	32.4655	53.8611
	23.0256	101.184	60.8116	14.3684	67.9077	85.4384	190.869	131.31	104.39	117.787	13.2388	28.3816	21.04	28.1091	54.3944	59.1186	16.9545	97.9649	71.5172
	30.7143	51.1899	72.2319	12.8657	63.1233	61.3382	159.05	173.291	101.329	87.4756	30.6234	22.9552	23.5342	29.45	48.8281	55.8529	10.8846	35.9831	70.4643
	21.9322	84.8333	29.6667	17.5536	55.1692	60.403	118.364	59.9444	67.8103	172.113	21.0972	27.2464	26.5738	29.9516	87.6212	37.8824	21.4107	36.1622	70.9697
	22.8077	89.3026	24.8	22.3182	72.7101	98.9516	147.034	111.759	104.364	142.417	23.44	27.3919	17.7077	24.55	205.013	44.1375	15.9506	38.5	75.8
	29.1333	66.8974	26.8116	20.9351	68.3165	86.45	170.378	131.931	72.5	105.984	28.1579	28.8448	24.4667	25.2667	196.088	55.322	21.7051	31.4	52.2278
	27.5294	32.4648	51.141	13.6351	47.3929	93.1786	108	141.411	174.491	130.9	30.1864	26.2278	20.6389	21.6296	191.589	61.0128	15.0667	69.6849	44.5571
	23.75	66.5405	81.4342	15.8182	63.3333	94.5313	211.154	113.724	139.838	154.182	24.9846	29.8621	19.75	45.0159	189.219	57.6984	25.9701	135.043	56.9
	25.1375	87.8933	43.2	12.75	28.8438	72.0704	131.029	136.441	145.768	94.6269	24.1667	27.8933	22.2647	22.589	179.747	54.3243	22.3462	92.8592	58.1282
	27.1552	85.6364	74.4366	17.2603	63.52	47.4462	129.444	100.506	108.185	194.785	29.35	26.8718	21.6026	25.6125	81.7436	45.3919	10.8267	23.8649	46.2222
	26.3924	87.8974	63.45	20.4875	23.0667	100.181	184.068	111.698	116.085	116.059	25.9867	29.4068	30.2987	28.5	205.843	42.8228	20.3235	90.5823	46.5077
	23.0492	70.48	56.9474	16.3151	71.5395	70.2051	137.712	150.625	72.8814	115.213	30.6613	25.625	20.0769	26.6104	199.662	58.5493	15.1724	24.0833	58.2571
	21.6081	81.6557	46.0513	17.569	46.9464	93.7051	94.5526	119.55	122.679	165.526	22.9444	29.4675	22.4684	29.2941	214.778	53.8701	18.1803	21.2459	57.4394
	17.7121	30.4189	61.4103	17.8816	48.6087	79.5205	104.197	119.655	130.8	123.534	20.6579	27.5357	14.7419	29.0429	184.171	86.8182	16.2586	38.9481	60.7761
	20.7077	86.2436	34.9359	17.4028	60.0735	85.3898	162.5	65.9848	123.637	84.36	28.5088	24.3014	23.4107	27	199	61.2949	16.3649	20.9655	55.3509
	19.8485	71.5571	85.0694	20.0267	57.8101	75.9429	164.519	131.415	113	92.6111	27.9286	25.0267	22.7895	23.7015	183.574	53.625	16.4583	61.8947	61.175
	30.4058	70.4571	49	19	66.125	36.3333	114.507	98.6892	178.365	144.308	25.7143	28.7467	26.4648	25.6667	85.75	66.2899	10.7895	136.632	39.4051
	22.2639	31.6119	77.2838	17.3235	72.6133	30.5781	153.623	126.897	79.4744	149.026	29.623	21.2763	14.7969	19.5556	199.417	60.2464	14.0385	70.1333	49.5443
	22.6441	91	37.0702	16.1452	32.3571	90.4058	55.1	122.366	163.492	101.209	25.5	30.5152	16.5484	26.3974	200.75	40.1299	20.1045	75.6	54.4167
	27.3415	72.7671	37.2982	20.3611	71.4545	91.8246	139.726	113.45	151.708	137.765	26.975	29.5857	21.5593	22.1017	218.802	50.7662	15.3077	52.5821	58.2464
	33.0704	59.625	53.5135	16.3846	54.4737	101.672	103.355	110.141	148.477	48.675	25.3506	22.1111	19.1324	18.1724	213.053	85.8841	23	32.4058	60.6351
	27.3036	85.4416	57.642	20.9718	63.8354	105.461	173.936	136.479	74.8289	124.444	26.6034	25.1867	18.1515	31	182.778	47.6333	20.8676	41.1429	59.1818
	18.75	80.6216	74.0933	18.6721	46.7636	21.64	155.382	141.875	99.1948	91.5325	24.726	26.5231	17.4815	24.6753	210.672	58.7763	16.1558	43.3049	64.8289
	20.6923	76.3684	44.1558	19.2308	62.3733	94.8889	164.692	102.193	140.015	154.338	26.5195	21.9706	12.8933	23.6203	198.935	30.5823	20.9231	38.12	62.9375
	23.3729	56.527	58.8553	18.3289	69.0658	75.2179	149.303	116.161	95.4	139.324	26.4308	23.1266	14.4769	29.5714	169.471	35.8	15.7273	40.5342	57.1167
	22.0423	67.6364	100.806	17.2714	79.375	36.3226	160.902	136.443	181.065	146.955	25.8448	25.4375	19.7973	27.1618	197.833	31.3247	11.9667	103.291	68.0533
	24.1733	82.5405	54.2568	19.2647	49.125	70.9474	166.5	103.808	142.547	134.169	22.4474	20.8361	16.6944	20.6912	207.256	60.8393	13.3676	70.7215	56.0429
	20.9868	85.1923	55.4426	16.8333	76.1429	95.3553	162.198	153.382	84.4805	142.866	27.4844	25.5672	21.557	19.6962	178.958	44.3671	9	68.3966	39.411
	17.4848	70.129	60.1923	19.274	68.1014	86.6667	164.883	136.877	125.63	149.071	27.8169	24.9322	15.7	29.4697	203.123	45.6613	23.5417	86.7838	51.5645
	26.5405	27.52	55.5125	16.1343	37.0938	44.3056	157.41	131.342	81.7627	145.316	26.2836	25.2597	16.7975	24.197	96.4286	64.7721	15.6538	27.0735	71.5246
	27.8551	31.6964	61.5417	11.7308	54.7867	68.1972	120.679	115.569	124.778	147.039	28.5067	24.8442	14.5652	29.2051	178.984	44.4412	19.1311	64	65.4407
	22.2911	39.9459	119.233	16.5823	80.8375	107.607	189.661	134.358	91.0571	155.852	25.4583	31.5902	19.6429	28.9474	182.093	62.0128	13.0857	23.7432	30.8442
	27.1622	75.7246	75.6111	14.75	46.8395	35.0794	197.16	110.113	148.892	108.342	30.8769	27.4935	21.7903	22.96	189.31	65.7368	10.7733	43.962	55.5513
	30.6842	51.0156	67.5217	15.7895	52.9464	82.3947	106.613	93.9118	135.75	173.1	24.2571	31.4118	15.8026	18.1639	182.311	35.5395	15.9241	42.3056	50.6667
	17.9722	29.5128	48.8421	17.0263	35.8485	92.3158	75.6389	127.147	125.574	181.257	29.1974	27.863	20.6026	22.5789	203.153	57.9744	20.775	39.625	45.3438
	22.962	28.4412	62.6418	16.9394	69.7679	36.3816	113.31	144.737	102.013	94.2258	26.9577	24.4286	19.0175	22.3333	202.096	57.125	40.7531	71.5875	54.1081
	21.8636	84.5942	31.8806	21.95	54.9565	43.3284	103.89	124.424	153.314	66.527	29.5857	31.7067	23.2586	30.2254	228.373	21.3676	18.8158	92.1094	68.6571
	20.6076	82.4605	82.8116	19.3429	39.0135	104.557	180	97.7397	64.2055	100.246	23.6034	23.2692	21.303	25.6462	209.887	43.075	17.9459	40.5	70.2532
	22.5217	35.2941	78.1111	16.6056	35.924	74.5965	162.789	48.6282	44.9846	92.3108	21.8052	27.3462	13.9494	29.1077	184.368	74.2	19.4557	78.5385	58.6885
	25.1286	63.4203	105.772	15.6623	84.1493	46.9242	188.05	141.737	140.043	164.3	30.4154	25.8246	13.8448	21.48	183.5	42.5072	21.0806	16.4028	63.5584
	21.1733	89.9123	65.3333	19.1781	71.0364	79.4493	182.582	157.8	96.0779	145.414	26.7703	29.8125	17.1053	25.9275	197.385	32.7302	19.4127	34.5139	59.3966
	23.0633	26.15	71.3	15.7188	57.9667	77.1	139.127	111.171	148.101	168.679	27.3049	22.7895	16.28	25.2982	219.896	47.8594	15.5775	27.7	55.2267
	25.5128	87.3051	35.4306	15.4688	68.0395	72.5082	199.508	132.885	62.2254	165.088	26.6026	24.0526	16.8136	23.9747	179.483	20.4182	15.1719	33.0649	59.7647
	23.5063	88.3067	64.0519	16.4533	50.5161	77.7761	204	153.797	132.79	128.724	26.0536	32.2469	13.4026	25.6615	202.6	29.6753	10.8696	23.6986	45.5584
	19.9861	88.0921	32.8833	18.2537	46.2361	70.3538	170.797	127.564	154.75	182.267	27.7465	28.3857	17.411	26.5342	183.962	31.7353	18.1765	110.672	56.7945
	23.3014	67.2656	30.125	16.4237	65.519	71.7368	166.861	97.1552	61.7042	186.313	31.4857	30.7308	20.7321	30.5294	194.087	47.68	19.6883	74.0641	50.614
	23.4464	104.86	60.2466	18.873	31.0735	73.7808	141.343	96.8209	22.3	152.456	32.5065	27.3733	20.974	34.1912	188.167	50.8814	17.661	38.7206	27.0897
	20.3649	58.8378	48.4231	19.8101	74.9688	71.9865	178.686	104.574	21.5333	149.525	26.3151	28.6232	20.72	25.8088	199.507	49.2625	15.4493	69.8667	45.6835
	22.4138	84.7636	71.8553	16.0526	34.7538	33.9342	150.429	108.951	41.0678	125.821	28.0417	23.6579	21.2982	28.0274	185.179	38.7821	17.3662	67.9167	61.8387
	27.4242	90.4189	56.0127	13.8551	54.1316	86.0123	199.147	144.07	77.2174	160.62	32.04	23.614	23.0333	15.36	171.158	32.8243	15.3485	42.4928	68.9868
	26.8659	64.2206	42.5758	16.7763	67.8276	43.2571	168.873	119.127	32.6438	138.27	29.3333	28.7119	23.5733	23.5455	188.885	64.1607	14.9167	31.0597	56.5
	23.641	69.5375	58.0351	16.4079	88.4464	70.2267	171.541	157.408	46.6447	181.921	27.6456	29.9155	15.3051	27.1765	190.542	21.4138	14.194	43.1404	57.4304
	26.5294	96.1538	38.403	20.0462	31.1935	83.4051	157.729	109.275	65.8816	151.797	19.2162	22.6133	21.5167	23.9881	211.904	48.8235	13.6	36.2321	30.2083
	25.5323	72.5833	38.5921	18	42.5063	90.0714	200.28	128.397	65.7333	153.683	28.8243	30.8167	25.8243	25.5672	153.127	87.5205	13.7414	38.6818	56.7917
	29.8861	30.3971	92.2286	17.125	56.962	48.5769	150.091	98.013	21.0469	142.853	27.7273	31.1846	20.4304	30.3036	218.94	101.618	12.9873	59.791	56.5443
	29.4844	94.5139	104.304	14.4615	79.1282	88.3231	193.413	96.8375	58.5455	146.783	28.3731	25.6579	23.8475	21.5088	182.267	66.4024	13.5424	65.4051	92.1739
	26.1867	82.4	63.5972	16.6944	63.6329	80.1757	184.017	95.4667	71.68	182.205	27.9744	21.5606	23.1918	26.8933	203.91	89.137	12.9552	77.1714	24.3662
	19.8852	91.4211	69.1429	18.3718	38.6232	72.5077	46.1781	99.6212	87.6087	134.32	27.4079	25.5882	25.2609	21.5231	166.29	94.0972	16.1493	70.8	65.2029
	18.0875	96	85.7193	16.3699	26	92.7869	169.425	135.186	17.0959	178.063	26.3077	20.4211	21.3521	15.7759	169.689	100.911	17.0395	82.1646	62.8571
	28.962	58.9016	32.7455	19.2143	56.3247	102.25	143	140.615	32.377	166.55	21.7857	21.8333	16.5614	27.45	138.552	80.0822	16.6575	47.3939	51.4615
	21.9859	83.4643	30.9054	16.8861	75.1216	86.869	156.416	104.875	38	40.6849	26.7313	20.7662	20.6184	35.6167	172.028	105.365	14.1176	108.203	50.3214
	31.8088	81.5143	65.9231	16.069	33.1	83.8667	91.25	135.783	53.5075	153.762	28.641	27.2985	17.625	22.2949	188.338	99.0794	25.5273	34.8831	47.2667
	21.3425	55.7949	49.2881	17.6716	47.9538	42.4364	149.426	99.2381	35.2182	126.986	20.9474	26.1733	21.2188	25.3544	76.971	121	20.7313	24.5833	63.507
	21.7561	83.6338	59.2113	16.35	58.3333	67.0405	131.328	125.12	74.3125	139.167	30.8228	25.5443	23.8116	23.3929	180.082	110.25	21.4737	26.4865	44
	20.16	74.9855	47.4625	20.6912	57.1406	79.443	167.696	53	58.8082	80.5667	30.4545	24.3934	18.359	23.7342	198.788	115.923	19.7101	33.3281	90.7027
	20.15	65.6585	100.419	15.0164	71.9	72.5897	146.468	107.783	45.7	133.164	28.7692	23.918	23.2222	27.2597	185.62	104.299	21.2813	109.089	63.6667
	24.0244	52.3134	68.6104	18.4923	70.7119	94.84	161.838	125.096	76.2597	115.119	27.0357	27.9231	17.5753	26.7971	195.26	133.329	22.3529	90.5694	72.2064
	29.9873	68.5696	67.2836	14.6471	58.2667	79.8875	170.738	117.731	35.3077	149.375	31.026	22.2083	18.0286	20.0139	179.654	34.8553	18.169	29.5217	62.7969
	19.5789	22.3544	76.1475	17.3167	80.5362	81.9512	175.712	76.4035	22.5574	131.355	24.2875	29.4154	20.9359	18.7465	169.797	96.4789	17.3286	37.8784	66.5536
	27.0972	103.025	107.75	12.7015	63.5143	109.269	170.732	96.9494	85.1803	143.23	30.9595	24.0169	21.1667	22.6296	181	96.3662	15.775	48.5526	49.2703
	26.9079	78.3088	55.6753	21.7571	46.7213	68.8158	176.458	48.4559	80.0875	152.837	21.6379	25.1385	25.8169	29.1169	202.276	109.378	21.2927	21.7931	62.3548
	21.863	69.1579	22.5429	14.7879	47.3571	106.359	38.2	94.3947	58.9452	159.785	25	21.987	21.1045	25.7468	186.475	108.683	18.8644	24.6364	28.1846
	18.0781	65.431	70.2368	15.527	34.4265	71.8413	180.646	135.266	61.8553	149.067	18.4531	26.6538	19.1549	16.7538	196.111	101.744	28.0303	28.7429	47.1316
	20.9375	76.1974	65.1719	14.4444	50.4333	91.6522	183.243	97.6456	71.974	160.192	20.6935	26.7973	21.5	25.25	177.085	101.284	19.6579	26.7361	54.3929
	22.5294	81.6923	71.5556	15.2105	72.7692	118.525	158.017	129.275	60.209	33.2532	21.1594	28.3086	18.6528	22.3704	193.127	74.8816	26.2059	19.9483	27.9836
	15.3182	55.7237	69.2542	16.4648	69	89.3382	44.5972	132.104	73.1594	165.886	29.8831	24.7468	20.8286	23.8429	167.195	121.924	21.8689	15.6087	46.2432
	23.6625	63.1642	52.5714	18.375	55.8732	38.4444	155.295	114.882	62.4063	165.905	15.25	25.1842	27.6456	20.7403	175.333	66.2083	23.4198	67.9091	56.6711
	22.8026	27.7639	63.2162	13.931	60.8182	36.0179	165.849	122.806	20.9565	141.421	17.875	28.3846	21.2951	23.2113	229.917	116.228	18.2667	26.7922	69.987
	29.5833	68.6622	54.0417	15.4262	68.2714	77.7436	189.6	126.829	77.5	39.0417	24.1324	27.0303	22.0779	23.5584	205.84	73.9118	20.2152	20.3973	32.2712
	26.6538	53.3594	57.0641	16.125	33.6724	96.4267	166.6	104.667	87.013	138.42	18.4521	27.1493	19.075	28.4928	185.338	60.7922	20.3077	20.3571	48.0676
	24.6716	71.4754	73.9275	19.4615	58.8333	49.7059	55.7385	129.886	13.1714	137.82	26.125	26.5443	19.9167	22.0256	211.423	136.349	25.4286	23.3544	61.2794
	23.125	88.3766	78.8676	20.4655	63.1571	84.475	134.558	87.7838	47.3846	149.329	25.4426	27.3056	20.1791	21.95	162.026	75.3	23.1184	22.1563	71.7215
	25.3247	64.5862	62.5658	22.8077	57.1765	92.0641	193.088	109.873	77.075	173.519	14.2973	25.6923	17.8393	24.7692	172.812	71.7273	21.3621	21.8947	37.3117
	24.3284	74.5263	55.5821	18.6964	67.4583	84.2817	156.269	141.421	26.4464	150.088	24.7778	30.1724	21.7722	24.8393	160.033	99.1613	18.4348	32.7778	24.4493
	23.3924	40.0735	57.4557	22.55	66.6795	89.9494	175.462	156.078	91.0769	49.2923	25.8088	27.8816	22.6164	23.9118	163.472	104.932	21.3117	72.0714	52.6
	29.5333	80.7027	61.8974	17.0606	69.3026	86.1786	172.719	127.344	46.6308	119.803	24.8108	28.1081	24.7143	18.1071	169.587	86.2917	42.1507	27.3636	47.2394
	22.3385	75.3607	65	14.1579	51.3205	106.959	211.933	147.724	29.5536	175	31.8421	23.1125	21.5405	30.0779	87.7945	119.379	24.2692	81.8846	52.8
	29.9231	69.1646	31.575	21.0702	70.0897	98.0139	164.192	56.9831	96.1818	158.351	26.9538	23.1493	22.8525	24.3924	186.833	62.0909	19.5072	57.1379	52.0769
	25.2576	72.6615	60.36	16.0685	66.2133	82.2807	180.536	46.0811	47.0441	155.385	13.2	21.3421	22.0685	20.3333	152.286	108.5	29.0536	53.3333	27.7143
	32.2923	73.8889	43.9231	19.2286	57.8714	96.0323	125.723	113.203	66.7069	198.959	20.2	22.1356	14.2462	26.3284	209.763	105.565	38.9636	78.459	61.3425
	21.386	35.2727	48.0897	17.0897	45.8	65.875	56.7297	151.488	56.1148	148.077	28.3103	25.2375	16.2414	31.3333	189.074	92.125	20.4328	95.0469	46.0256
	19.6471	65.5135	54.0506	15.6286	74.0286	102.491	143.192	146.844	86.0351	162.554	12.7903	22.6712	23.0694	22.3934	197.964	72.6271	31.7627	70.4935	61.1385
	22.2667	56.3824	72.5844	16.3247	48.5172	87.1552	103.103	142.859	36.3836	111.062	26.8947	28.3158	16.3188	26.8966	178.603	58.3088	22.2639	45.0156	67.5323
	17.9634	77.1013	78.7432	13.2125	77.0263	91.0164	45.9367	102.439	29.6267	50.5733	35.7778	26.013	25.0128	21.4324	197.797	90.3043	28.8052	88.2647	54.1139
	21.8421	53.7419	66.2857	19.1667	58.5143	93.2857	142.949	131.386	68.55	126.694	18.8961	24.8205	18.7639	23.9103	200.531	99.0128	23.92	100.738	41.9625
	23.7463	72.6316	41.1447	19.1	58.5156	74.5135	49.7532	114.274	83.8966	90.725	28.8611	28.9211	17.8438	32.6447	195.581	25.1169	17.2537	52.1486	64.4225
	19.9697	51.8246	75.9863	20.0127	57.7049	83.25	164.464	112.156	26.2381	40.9211	26.7458	23.5972	22.641	26.7143	181.889	82.8485	26.8235	138.241	65.4638
	22.8734	78.8481	68.7759	18.3553	74.0597	35.25	188.934	113.742	88.4474	126.197	27.5507	22.9114	20.0127	25.2899	204	94.7143	22.3846	75.48	53.2308
	25.8356	67.924	55.3067	13.1829	64.1552	81.3091	147.784	88.6154	86.8272	43.9481	19.4769	21.1846	26.2875	21.1429	189.795	113.926	15.8718	36.6615	67.2778
	24.8354	60.45	56.1379	19.2931	70.0508	70.9079	129.085	133.646	38.9474	149.375	28.8462	27.9747	14.8088	20.7313	173.514	138.944	20.1471	67.3594	53.4603
	22.8734	65.2239	67.1358	24.3784	30.1186	88.2436	173.569	110.861	30.9265	173.48	19.1	24.3393	20.5493	27.3846	164.909	110.362	16.3793	79.9692	49.5844
	28.48	71.5125	86.1143	22.2769	80.5672	95.5072	44.9605	133.847	36.7273	129.684	26.2381	27.0893	22.1646	19.5	198.16	95.7206	17.7143	71.6667	62.3939
	25.6	64.3333	58.2167	16.8448	68.6812	86.8553	167.095	142.885	63.7143	114.431	23.0253	29.5424	21.3377	18.1857	201	92.4875	17.3023	66.5063	51.4512
	22.4459	94.1429	50.0147	21.1207	36.1148	61	194.25	134.158	57.4722	157.017	21.9595	21.4737	26.3788	18.7403	208.986	101.579	21.9615	105.896	94.6
	17.3768	93.84	53.1786	21.7432	31.2051	52.5294	154.125	110.529	51.2763	39.6579	27.5205	20.2281	24.5278	27.6552	218.345	104.471	19.8923	44.5385	57.1216
	22.6765	69.8243	59.2857	21.5263	82.7792	40.8571	186.605	118.875	54.7333	151.162	28.5152	27.806	18.4366	22.8395	205.218	35.7273	26	112.362	42.1948
	16.6582	86.039	54.0526	11.7541	53.6049	104.945	72.0462	123.633	58.6324	177.277	30.0141	27.175	25.7797	26.3833	210.101	66.9726	18.9211	55.5467	46.5128
	22.6	73.8571	67.8974	23.1486	32.1803	85.1228	141.025	92.5	48.0294	137.219	21.9118	24.1667	22.9221	22.8421	193.753	57.8272	18.3443	50.2375	45
	23.7975	105.246	47.7121	23.375	86.4521	105.932	119.416	124.892	20.3478	170.947	26.2769	20.5362	22.8375	17.6207	185.879	74.2656	17.7051	115.394	72.0704
	20.1449	31.0299	49.6974	17.7654	67.2586	90.5714	185.114	120.483	62.3827	64.2923	23.1449	21.1154	22.5135	27.7101	208.797	55.7778	17.9474	73.7429	55.1471
	18.6849	71.5	56.0253	20.8462	78.7606	103.585	172.5	101.092	69.2394	125.734	30.2394	20.8514	13.7414	19.8571	203.121	52.1918	29.2333	76.8358	57.7368
	26.8718	104.25	32.791	18.6579	77	73.3231	145.74	120.565	66.1159	105.5	23.974	27.4928	21.5606	25.2353	150.461	107.346	25.875	28.4627	55.0513
	26.3333	67.8507	45.4605	19.5484	76.9412	73.431	110.359	115.029	76.2877	168.45	21.1429	23.5467	21.9464	22.1266	195.258	85.4746	19.55	37.8846	70.1842
	20.2615	76.8421	55.8125	27.0385	65.6765	69.0781	153.861	151.987	61.2833	152.765	29.9054	23.4342	24.8143	23	92.5397	77.3333	22.3333	33.9118	25.2909
	25.359	78.1053	62.5	22.0263	45.7143	71.1186	100.128	152.557	59.6351	128.744	25.0526	25.5789	27.4935	30.6571	206.987	70.5469	16.7733	54.0886	64.025
	20.4865	67.0735	23.8136	12.1667	26.2632	73.9167	204.614	106.558	60.9538	97.5625	30.8592	25.1765	25.1	28.1493	191.724	113.875	17.6203	60.8052	44.5067
	19.9577	58.4366	53.4483	20.3684	75.9605	79.1304	117.077	140.803	52.6056	136.788	25.0556	23.2877	25.8987	22.5672	220.868	94.4028	25.1711	82.7922	59.3077
	22.8571	101.522	50.9878	20.2973	87	69.8267	221.304	141.246	71.7273	88.8718	30.4366	24.5362	23.2125	19.9351	191.657	106.42	45.7105	54.8718	32.0462
	24	65.4688	38.1864	19.9583	43.2381	55.9231	200.278	112.464	28.9211	190.25	24.075	24.0533	22.3659	27.0317	137.41	109.077	23.9333	92.2857	53.5246
	20.1897	71.3544	58.6267	16.9342	44.9706	108.44	172.724	99.2778	52.8615	103.29	26.6184	23.0811	12.5082	25.7966	161.4	57.6452	29.7143	74.3797	67.0704
	25.7344	60.8472	74.5667	14.75	28.3788	89.6957	48.6066	133.072	75.0267	207.14	31.3816	16.2903	19.6716	25.4789	190.015	99.1519	24.9855	156.123	39.2281
	22.7468	52.9359	69.3816	16.2394	43.6625	96.0694	47.45	115.804	119.421	186.375	29.1884	24.5211	24.8904	14.8571	168.656	111.758	23.3625	57.0263	70.3538
	23.8154	90	39.55	16.1	89.9577	83.983	53.1356	69.2	35.0685	154.28	30.7727	29.1746	21.5256	29.2568	184.479	80.6076	27.3729	103.038	49.9333
	22.5584	81.8625	70.1154	16.8393	80.2143	66.9138	79.9286	117.625	120.082	42.9508	27.6757	25.1974	19.2174	21.4684	175	76.0161	24.0339	27.6974	36.7333
	21.2069	63.0641	27.6613	19.5921	86.0508	82.2838	142.581	109.293	74.6623	41.925	25.9123	22.3571	20.4512	23.2647	177.276	108.382	20.9367	75.5362	55.0247
	21.3816	79.6316	42.4459	16.2881	86.5538	91.4648	149.744	107.069	106.76	46.4576	26.0952	24.2763	17.7015	24.2051	181.368	110.111	25.2436	79.8571	55.4512
	21.5072	75.5	48.7013	16.9706	83.0702	85.0702	48.4844	118.174	69.507	63.1096	23.2025	26.5072	18.6714	31.3797	158.525	68.8133	24.026	131.6	48.0484
	28.025	34.7324	55.0606	18.2239	67.5278	67.3636	168.268	101.62	73.4605	126.113	23.2424	30.5	20.3051	19.8481	208.606	67.8214	22.9857	46.0563	75
	18.4355	112.392	66.3492	18.4028	67.0469	73.225	71.0278	155.6	93.6216	169.667	26.9324	27.3151	20.2424	27.4265	195.299	89.4103	18.8974	85.3056	76.0323
	23.1781	53.5	78.7468	16.5781	68.8235	75.6835	65.3393	137.431	28.7051	133.59	27.209	24.3378	22.0789	22.4143	189.705	76.5063	26.0976	99.3881	32.3448
	26.0385	85.4667	65.338	18.8667	83.569	79.1772	39.5862	132.27	82.194	43.6462	29.5217	20.7671	17.141	21.2	215.485	70.8095	24.8154	33.6333	59.6835
	17.4912	51.0263	60.3714	17.5455	29.3649	78.9403	187.103	108.221	63.4583	151.866	31.75	20.8	12.9437	23.5797	219.462	130.828	22.6582	29.7692	55.1846
	18.5921	81.7222	28	27.0625	65.9697	91.3836	49.1948	123.766	41.6349	63.7042	27.6557	22.6	24.6833	20.9367	166.684	58.5432	41.4444	92.325	46.6167
	17.4615	81.5846	44.1452	23.5541	38.1884	83.4429	156.726	132.617	112.451	57.5714	23.5075	25.4545	23.1026	20.9296	201.105	52.2615	31.2763	48.5	30.8676
	24.1039	95.7564	28.9857	16.3571	85.3205	66.1148	46.7727	106.38	99.6173	34.6271	26.1467	29.4561	16.6491	25.875	191.571	72.4028	21.6456	76.8182	71.9211
	24.4918	65.2436	54.338	21.1507	46.6184	110.649	61.2615	142.443	85.3333	43.75	26.557	19.0132	16.6429	24.8696	166.185	100.766	41.1449	87.7571	70.4143
	23.3973	80.7213	27.3167	20.7467	52.3968	79.1343	61.3026	139.276	32.6111	141.459	39.5139	23.9103	23.9861	26.8289	162.589	51.2424	23.431	25.6296	53.2911
	21.7692	63.3214	55.9444	16.4375	65.4615	32.1304	51.3421	111.342	82.6212	41.3692	31.25	20.9559	17.8974	22.9322	198.6	57.1077	57.6471	161.236	46.209
	23.8955	81.6761	50.8553	15.7544	68.6	81.6667	185.109	132.846	27.2361	54.6462	28.1429	25.8052	22.6944	25.9559	218.667	53.6491	45.7667	131.907	61.7848
	23.3382	23.1385	29.6812	15	27.0411	97.5167	53.8267	116.724	95.5256	53.8312	26.75	24.1094	14.0149	24.4444	177.08	72.3562	52.3433	31.5455	83.0625
	23.3509	69.8814	45.3478	20.5538	79.3896	100.083	196.81	103.042	46.3846	46.2055	26.6324	18.2833	18.3559	17.8305	221.569	136.877	38.5526	52.6071	29.9091
	21.5882	73.6901	65.5538	22.8732	44.8553	54.9464	191.949	148.109	74.2532	167.818	28.1711	23.7414	21.9219	18.75	207.409	80.8382	55.4179	86.4783	24.875
	20.9412	81.7945	41.1972	21.2692	78.7936	80.8	40.3433	150.506	49.4051	47.48	25.8718	28.7297	25.9655	27.9242	69.1857	81.3562	49.4268	79.8513	53.6364
	23.4493	74.8158	49.6375	23.3966	64.5	66.3939	100.132	128.579	52.6471	181.889	30.7595	22.2466	18.493	19.7097	201.344	85.7705	36.1216	75.7403	40.4407
	24.3429	30.6429	44.1045	15.1029	33.8429	99.2188	135.462	67.5846	68.6875	177.579	33.2353	21.3235	24.2069	21.0946	152.625	130.435	48.8889	81.589	52.4937
	26.7971	79.4189	36.5733	17.2586	31.614	100.226	174.089	112.907	65.9077	35.4853	27.2353	24.7164	24.3924	24.3205	206.157	71.4868	34.2241	27.9375	47.3684
	22.0968	106.091	29.1613	17.9605	83.55	94.8462	156.254	57.9231	57.3099	88.4342	24	25.1375	21.0548	24.8026	194.678	86.375	47.622	71.8421	47.7662
	22.2078	104.234	46.2069	13.7679	38.2714	84.6364	161.133	130.733	53.339	120.256	27.5733	23.9605	20.4533	17.8919	169.403	81.987	54.5072	63.8625	47.7656
	22.7342	60.2	45.28	12.9221	47.3881	59.4474	177.042	141.571	95.0154	156.861	25	23.2692	22.8056	21.7808	200.359	48.7377	64.2754	112.286	29.569
	19.0769	54.2469	36.9	16.5167	77.6957	78.4231	107.716	133.797	65.2	139.898	26.2742	24.7123	21.5488	21.9259	183.701	57.1471	46.5424	36.6301	55.2658
	18.9538	32.8533	62.1324	16.4407	73.2778	95.5333	156.722	113.532	81.1385	145.773	26.0128	15	20.5942	18.3582	185.89	76.6418	44.1667	56.6197	125.176
	20.9872	75.1026	40.8276	20.35	62.2	88.0435	160.851	111.4	72.6119	157.917	27.0886	25.7647	16.6212	35.1538	185.176	75.1176	58.1746	32.6949	106.967
	21.4444	33.0779	38.8846	19.5147	60.8933	76.2911	141.438	136.467	104.779	95.527	23.6207	21.7846	27.8974	26.037	120.159	94.2424	34.5714	105.514	56.5
	24.2222	77.5916	42.0256	14.0263	73.4026	75.6885	150.405	119.65	64.9322	140.946	25.64	25.1017	27.6301	24.6125	201	85.4675	32.6364	181.507	48.9737
	21.72	92.431	26.2564	20.9412	62.7051	46.6842	163.456	126.45	42.5	143.307	19.0667	15.322	25.2899	21.2267	102.6	113.723	18.6522	36.0469	40.5974
	24.3421	68.8519	39.3036	18.4198	70.8354	76.6885	174.254	138.448	99.4359	126.042	32.2597	19.9016	25.6104	18.8814	169.377	69.7313	29.175	92.8103	23.463
	27.0625	84.5797	31.4737	21.15	71.5574	95.1774	179.051	99.4935	65.9265	136.767	27.4304	23.9123	18.1	26.9467	150.946	77.3418	55.1026	80.6333	56.0141
	20.3214	34.8219	17.8243	21.8	35.274	72.7391	137.309	107.052	38.04	145.478	43.6271	28.75	16.825	19.3286	120.26	86.0789	38.1356	40.3231	53.1667
	22.7013	60.3158	41.9077	16.5758	77.1406	108.62	143.844	156.952	86.0923	158.478	26.6	23.8857	23.0435	24.4648	195.967	51.8214	32	196.949	51.2951
	21.9231	57.0172	19.9067	18.8125	13.9241	87.8169	165.554	110.621	71.3182	163.603	32.4487	16.8841	23.4058	26.5294	189.029	112.753	40.0395	31.4507	43.0625
	17.716	120.263	47.0897	19.9667	12.9667	103.257	179.143	142.577	56.5063	122.721	24.3077	27.8052	20.3462	31.0536	204.662	94.4805	36.4333	148.333	93.2899
	20.9565	30.7414	30.3671	22.3929	14.5909	115.703	122.419	119.74	93.5323	127.094	26.5467	26.6479	20.7722	22.7342	173	78.6721	16.9351	76.375	51.0923
	22.6087	75.3651	57.5735	21.254	14.2923	108.07	181.16	103.286	48.1695	149.893	18.0519	24.8052	16.3506	22.1286	188.493	82	29.2857	34.0641	26.0972
	27.5915	79.0323	40.75	16.678	14.05	62.0508	157.613	132.784	73.2286	164.667	27.6438	20.4133	13.6812	30.0278	174.509	66.6271	65.2895	103.507	45.3944
	19.5323	86.8025	33.2763	15.2759	21.1216	75.6719	156.258	133.797	105.731	107.548	17.2278	29.5345	19.9298	20.7971	190.76	68.5672	35.5614	116.446	37.5179
	23.9459	94.4416	33.1964	15.5429	19.8393	103.076	153.544	135.741	117.614	166.378	28.4444	28.527	16.9254	21.0727	186.898	51.7975	47	39.9412	22.7167
	22.0274	27.2025	37.8209	17.831	21.8	103.73	167.156	124.487	65.2361	140.45	27.1282	21.7468	17.7162	21.2632	197.677	34.6029	33.4762	95.125	57.1549
	24.9855	104.838	48.3088	19.039	20.338	74.359	167.125	108.486	73.0886	143.984	27.7761	27.2537	17.5902	19.0685	164.627	57.4865	26.3026	36.0746	36.3714
	26.4107	63.8472	30.0633	18.85	24.1186	91.6557	146.525	148.338	85.3559	141.952	23.4324	19.2162	25.2581	17.4211	155.513	51.8714	43.84	36.7246	48.9452
	20.9242	35.0847	46.6154	18.3377	29.4872	82.0526	176.288	141.262	92.05	155.419	33.0988	28.1842	24.5385	25.7857	212.418	62.0484	23.6286	91.6897	61.9583
	17.3289	44.6493	37.0833	14.0154	27.2	75.8781	85.6286	131.569	135.987	149.688	21.3077	18.9595	21.0986	27.4306	184.848	88.141	23.4839	136.208	48.8571
	23.1169	52.2	39.9615	16.4805	22.8	66.4483	176.907	144.972	89.6528	130.705	21.2133	26.7941	23.0833	15.6364	192.403	86.6724	25.2564	71.1455	44.4103
	23.027	38.4237	36.069	14.1053	23.1471	65.7042	176.456	112.594	91.6182	161.688	29.1324	24.443	18.9444	30.5775	187.355	25.5676	25.1266	168.518	109.479
	20.2687	56.9697	64.4474	17.0127	42.6301	82.1351	129.689	108.841	75.7667	75.6429	27.35	25.0833	19.8667	18.5278	204.875	60.1786	60.5139	148.043	49.3968
	21.2308	66.8485	48.8734	21.0405	38.85	90.8919	181.25	108.104	78.8533	161.64	32.5316	26.9123	18.3026	16.4727	156.576	87.8833	66.8929	41.8644	124.861
	25.2321	56.5	29.3117	18.5385	31.6338	71.8525	191.955	57.3036	91.8472	159.19	26.6949	26.05	19.3231	19.4923	167.745	94.0172	99.4308	75.7313	56.2344
	25.8246	50.9828	37.642	22.9114	25.0597	73.4872	168.692	108.71	67.8873	115.5	28.1449	21.1356	27.2414	27.0333	109.452	51.7586	87.6173	136.582	46.3377
	23.3077	52.55	24.2206	18.5063	16.5946	80.2394	151.662	116.155	99	165.824	21.3143	22.6721	14.3784	18.9688	222.065	50.076	87.6102	63.8286	24.7895
	20.6625	23.4557	30.7973	15.7922	22.9649	80.2949	124.662	68.5179	98.1795	179.821	31.9048	22	19.8267	18.5455	191.125	22.4746	79.6667	163.121	51.0658
	17.6438	64.6757	33.8	18.625	29.2639	52.7971	150.907	106.899	44.0328	151.585	22.3051	20.4068	25.1897	24.7162	167.301	67.5128	56.3611	93.2466	42.9242
	20.7436	40.4865	32.3291	18.7468	20.4918	101.083	170.701	100.908	81.5147	136.027	19.8636	21.8974	32.1711	23.8701	164.958	69.8611	98.3485	72.2917	61.7344
	24.5	33.7297	28.058	19.5946	18.0617	80.0328	124.589	97.5088	91.1379	109.906	26.6875	25.026	5.49254	24.3846	123.156	78.9342	67.7436	179.319	28.88
	26.169	55.8689	27.7308	15.2027	32.56	47.614	175.11	131.3	55.5362	140.743	27.6842	25.8033	6.0125	19.0175	59.8286	47.0125	91.1282	146.238	45.141
	22.3857	63.4048	44.0909	15.4937	26	110.441	190.583	107.435	89.1343	157.169	28.0806	30.1385	7.40625	28.1892	170.264	65.7432	86.2105	143.123	63.5932
	23.2152	20.2027	46.931	11.2239	22.5147	80.924	74.7424	132.45	59.7632	109.93	26.1558	24.6944	21.1266	14.4348	175.867	66.4054	85.5	95.7632	47.3284
	22.2388	62.3875	52.1967	19.55	18.0656	71.0345	175.053	140.647	79.9836	156.778	25.4355	17.4386	21.8077	25.141	162.564	68.5625	116.554	167.339	37.3636
	21.2973	54.44	32.2034	18.3448	27.6271	67.6622	193.333	133.797	90.5811	178.191	30.1389	19.6582	21.127	22.9063	186.594	60.2308	36.8133	31.7887	41.2027
	20.1375	50.0405	34.0833	18.0133	33.4815	87.5625	174.152	129.162	80.4531	66.0152	27.6143	23.3289	21.0167	25.0135	185.987	64.1429	71.1538	83.8824	143.118
	21.1452	58.1918	45.6957	16.5926	13.2031	70.4032	148.147	96.5152	109.975	157.784	17.4783	28.0303	23.6833	19.5536	131.904	56.4872	47.1467	78.9867	39.4684
	23.3214	60.2532	38.725	17.6267	32.3276	82.4675	174.09	179.789	76.0167	175.289	20.2361	25.5278	23.3382	17.9254	198.281	89.082	91.0147	32.8261	26.2319
	20.2564	49.3896	26.8154	19.0167	24.1774	46.8772	174.288	112.22	100.136	156.2	31.2712	23.0833	21.2632	18.5167	166.576	52.5797	50.3333	70.7467	49.7143
	16.2877	21.1351	33.0685	18.1875	20.9583	89.4026	150.881	127.37	91.7639	137.353	26.3714	24.629	19.6338	20.4	164.932	74.5797	93.3611	70.4737	48.9155
	26.0656	37.7237	32.2838	16.9605	25.7692	114.115	174.635	120.901	74.6757	157.093	28.5179	21.2632	20.7463	20.7639	154.563	28.9615	101.208	111.391	54.375
	19.8209	75.4833	32.4416	20.1351	30.8442	86.8551	145.169	111.908	49.65	158.966	24.7313	25.0127	21.9506	21.2759	189.097	46	124.941	44	41.5823
	23.5811	60.2727	37.6892	18.1528	21.2987	83.3896	197.1	124.035	59.6618	134.194	32.3457	21.75	21.3188	23.4576	164.012	65.0833	95.1899	67.9306	34.6406
	16.9367	49.9692	43.0143	19.6071	37.2821	80.9516	73.3165	91.9853	73.7	158.681	25.6883	25.8361	15.9667	19.3506	175.284	24.6716	74.4583	151.458	42.1463
	26.7692	67.68	35.4737	18.7143	39.2105	64.25	157.194	86.2985	125.172	129.156	27.55	20.507	23.7105	26.775	112.529	33.3382	76.9103	32.0536	38.2639
	21.7013	54	30.6806	17.4737	34.5769	87.2432	122.658	136.346	33.6984	178.734	26.9143	23.675	21.0625	20.1765	113.258	33.3906	105.089	70.4074	41.5152
	20.8714	40.0959	36.1029	20.8261	33.3	71.0875	178.232	113.873	44.3125	64.5875	26.9394	24.8154	23.0339	24.2281	166.211	28.3036	108.469	94.4026	48.6984
	22.3494	30.1091	38.141	19.8831	28.9091	79.194	161	146.149	49.8136	144.925	25.9861	19.623	21.0135	27.4921	172.691	25.5781	111.456	67.4776	50.0833
	22.0806	70.5224	41.1233	18.5672	19.0147	74.4559	179.397	87.5069	63.5893	109.633	28.2679	16.8571	26.6197	23.3867	48.9275	71.2838	73.7031	162.051	58.6481
	18.0395	81.9857	36.2239	21.4655	31.1772	74.8143	132.741	107.52	81	161.188	23.4286	20.9306	19.2763	21.375	139.759	22.7368	76.1493	72.3333	29.3492
	26.8611	22.6034	39.3676	19.0822	28.7931	84.0909	188.744	108.868	81.4474	144.195	27.9571	20.3816	24.4154	23.8571	92.8611	73.9875	85.3333	70.6491	35.8514
	19.4342	46.9868	42.2344	20.8056	23.5645	72.2727	113.9	90.3934	91.1081	160.242	21.4828	20.0526	26.0143	23.0429	165.684	37.3913	93.375	105.55	43.2917
	22.1	45.6364	58.2958	18.1639	38.2895	77.2466	195.788	116.4	81.1194	118.644	21.5405	20.4493	21.5	26.5455	145.068	82.375	83.68	131.085	39.0704
	22.3443	45.64	27.9464	15.8529	28.3692	84.2958	63.5753	135.584	77.8481	170.769	24.7761	22.6286	17.9718	13.8861	70.1791	53.2121	81.1795	97.1159	48.127
	17.7302	34.4655	41.8052	16.7571	18.1918	69.0164	157.681	123.026	73.0588	102.116	28.1067	24.3667	18.5	25.8983	174.152	28.6143	74.1974	114.121	104
	17.5732	37.1392	31.1818	16.1207	26.7385	58.7432	135.5	120.062	61.1169	180.038	28.8182	20.3433	22.4912	17.2615	163.582	41.0161	88.36	146.455	74.3974
	21.1974	30.1486	25.7089	20.1538	25.8571	99.7576	185.632	118.082	39.5844	56.1096	31.2877	27.1695	18.8305	19.6986	116.556	56.5385	42.9091	74.1091	29.7722
	30	50.1475	27.9333	17.5075	31.4746	107.175	171.127	112.506	85.9863	139.181	30.918	18.7	29.2131	21.7429	164.355	47.0133	109.015	76.1772	51.9063
	23.7206	30.4416	30.5345	16.1892	22.2821	85.0645	206.232	163.6	94.7241	118.763	27.2267	21.5897	16.2	23.3649	142.5	70.6711	89.5846	86.7183	46.6667
	20.1094	27.2542	30.2535	17.026	21.9516	83	190.486	90.3906	83	169.789	28.4576	15.4154	21.9	27.8831	182.431	48.5395	105.735	80.3429	31.9167
	21.6286	54.68	61.675	22.5833	31.4103	80.5763	129.908	112.85	69.716	156.205	30.05	22.7778	22.1364	22.7397	183.333	34.8056	121.18	69.8481	53.6234
	24.0833	53.3548	48.8696	28.8615	21.9474	74.5128	148.429	126.242	62.026	190.13	21.5079	17.6806	22.5942	26.2286	211.855	25.3478	109.545	108.8	51.4429
	18.0746	25.7571	73.1618	15.4306	22.3714	78.0909	140.181	120.721	86.5556	171.867	28.2667	14.3	21.4833	31.443	161.975	49.6418	26.2763	166.542	35.4286
	24.2361	86.7377	69.3559	23.3898	26.8333	79.3014	204.813	122.462	56.2206	114.697	23.7705	25.3393	21.3718	25.4026	219.41	56.0746	119.886	83.4375	46.0536
	24.0133	62.7467	32.5976	20.6176	20.2308	93.4865	168.6	121.027	98.6618	133.464	28.5823	18.9412	21.0286	30.4068	162.786	46.9467	89.4	82.3924	51.8814
	22.3636	45.0645	63.4576	19.7656	38.1389	101.727	150.082	123.764	34.3158	122.507	25.3478	24.3667	24.9872	26.4521	160.529	19.0988	126.93	131.388	45.7619
	19.5254	25.4483	34.0429	17.7013	33.913	75.2923	167.974	120.727	45.8448	186.738	27.95	20.9538	19.6447	24.0641	71.6308	22.6607	100.712	130.636	35.8873
	18.0132	61.9324	46.7179	15.3889	36.9221	73.3433	187.063	107.863	35.3729	153.651	28.2281	19.5238	22.1528	32.2742	157.732	30.36	86.1333	80.4615	50.7119
	19.2078	52.2581	27.8228	17.3636	17.3279	79.3438	133.966	97.2368	30.6491	134.708	26.8718	20.8205	14.8364	35.0156	174.527	49.1719	70.0441	36.3077	60.3231
	20.375	21.3333	65.1429	15.3291	33.2436	85.141	203.247	128.014	97.2297	152.705	25.4531	23.6753	19.6479	20.9333	182.606	28.029	87.6324	101.099	48.1774
	20.3291	20.4933	93.9265	19.5946	24.7	89.2059	159.257	83.2192	58.88	168.65	23.5128	22.0313	23.5065	26.5244	196.684	26.7302	102.824	141.5	57.481
	24.1728	74.0152	61.8551	17.2069	12.5942	67.8358	97.2179	99.75	100.929	128.534	30.3671	21.9275	22.6974	22.875	83.5652	28.7681	90.9324	106.554	64.6333
	22.8028	55.1646	98.1818	21.5373	23.5588	80.8052	115.915	132.829	43.7857	186.618	29.0556	22.254	19.3833	22.4182	179.631	45.6667	99	159.431	50.6719
	24.8846	52.7288	70.8308	16.8533	23.0308	111.491	138.746	119.785	68.1525	142.974	24.662	18.4	23.5625	25.1129	176.952	28.1429	98.4231	72.7385	52.3803
	27.55	60.0286	52.5309	16.2125	21.137	85.8493	138.5	137.861	83.2679	86.3333	23	24.8214	17.5	30.9625	158.75	35.7059	93.5714	42.5641	35.8793
	23.7143	53.3077	59.924	16.7051	15.807	86.95	164.568	99.0161	67.6552	105.941	22.0435	19.2794	20.0256	28.039	196.672	17.0405	79.9333	73.8305	48.4931
	20.925	40.4203	48.9324	22.7119	22.7778	71.8158	114.345	117.321	41.7875	125.276	32.4935	21.9737	20.4211	30.9839	183.6	23.4107	119.506	70.5875	95.9577
	25.9	69.0417	64.1899	18.8026	27.8033	91.0641	155.197	157.31	70.4938	122.921	22.9344	20.2424	17.9855	28.9865	141.855	78.7692	96.7541	85.7662	59.8358
	22.2895	66.6557	74.8333	15.5902	25.0649	94.0253	153.559	133.974	81.75	145.837	27	23.9324	22.9733	27.3289	66.5139	87.1233	112.078	33.863	42.8143
	19.7867	24.3387	67.0606	20.274	30.7703	101.412	166.412	132.789	44.4308	104.554	27.1552	21.9077	23.1711	19.7424	171.188	68.0164	133.239	99.1273	52.4559
	18.4706	17.0714	81.6986	22.3231	25.7143	90.4737	146.258	127.462	42.8308	139.6	24.1585	18.2692	19.2466	23.2206	180.477	22.7887	65.3559	71.9351	65
	20.3247	43.5345	67.1194	23.5797	27.0886	73.2154	198.176	129.184	66.7627	136.356	25.0606	24.7213	20.5893	25.4643	129.902	17.925	38.791	78.1667	45.924
	22.082	22.7761	37.0328	16.4262	26.2237	98.625	143.76	121.987	71.4848	148.706	23.2532	18.7887	20.3729	22.4658	213.667	27.8143	95.9221	72.95	44.4474
	15.4	76.6765	90.6716	17.6667	29.0959	87.193	206.038	107.467	92.8533	130.061	22.4868	22.2025	22.5156	29.3455	191.922	62.3415	42.2131	151.447	26.9444
	20.0685	80.6491	58.8406	22.6494	19.2414	72.2571	165.105	128.564	77.6818	180.667	32.4848	26.3175	22.6364	27.7	173.842	33.5167	155.609	137.213	34.4
	24.1692	61.0526	71.6456	17.08	23.1013	86.8143	187.855	142.718	82.1053	127.307	34.1719	21.6364	22.1231	32.3704	155.864	36.0274	67.8769	69.8393	57.039
	20.8814	71.8833	88.775	17.7778	18.5488	91.5	156.829	128.639	22.9846	190.584	23.8088	25.8125	21.2152	27.6957	145.221	31.4507	39.9583	86.6329	61.8472
	18.4648	46.1622	72.2658	19.6081	27.4143	81.24	188.64	113.556	20.8525	147.632	31.5696	23.8732	23.6049	26.9846	151.41	63.5	110.985	101.348	65.2941
	21.527	39.3036	59.4828	24.3235	32.7049	81.9851	157.6	135.703	31.0741	172.642	28.5417	21.3559	26.9178	23.987	196.382	69.8732	106.39	81.6667	68.5916
	18.1061	74.8108	59.1519	17.4103	28.6719	87.7703	193.226	117.948	77.6234	140.225	31.5	24.0896	23.0513	27.359	187.804	66.8545	104.308	174.486	57.1692
	29.9825	76	69.1695	21.962	16.1892	74.2143	157.448	155.592	101.519	170.299	27.7867	24.0896	21.7818	29.6	137.974	72.9861	85.8689	79.1833	45.3623
	21.1017	57.5584	84.4444	20.7538	20.0704	39.1235	183.014	88.0282	101.797	140.408	27.8169	17.8529	22.0685	23.3731	156.615	65.3333	49.4286	76.5405	48.7375
	25.5616	50.8947	71.5942	17.7353	14.4744	82.7308	213.481	128.013	71.6866	178.902	22.675	22.1094	23.8727	24.087	131.221	62.4667	94.0658	33.6094	49.3182
	21.4754	29.625	78.1268	18.7465	27.5667	80.5965	169.297	123.206	125.443	139.947	29.5063	24.6709	22.5758	26.3043	185.904	69.6184	107.875	32.4394	72.0526
	26.0921	50.5091	67.6923	20.2899	31.3529	87.0811	153.54	121.95	83.0545	162.658	31.6029	26.5273	23.1923	21.5362	180.638	48.0476	78.5862	72.3571	51.6667
	20.0694	56.9714	70.1471	18.013	17.8197	83.1029	184.825	124.149	76.1644	198.581	31.6964	23.6316	21.6757	36.4615	186.638	61.3529	64.2179	84.6111	45.3462
	19.5926	55.5932	56.8286	14.0806	28.2208	85.3205	179.056	89.3165	115.905	154.519	21.5156	22.8701	19.6825	29.0172	186.515	56.5205	97.0847	79.0143	60.8571
	19.2154	47.9464	93.1781	17.12	17.0508	81.2759	157.321	86.1667	138.767	136.806	26.9474	25.6034	16.4262	24.9118	176.426	58.6866	76.7941	64.6102	49.2763
	16.3521	71.4429	69.36	22.0141	17.9833	114.408	148.531	68.125	137.737	166.463	32.9322	24.1754	18.194	22.7759	207.708	82.0417	96.5385	86.1667	56.1231
	24.4348	56.3611	58.0145	22.6709	17.5823	99.8875	131.407	102.726	112.479	160.69	24.5857	20.7436	22.629	24.1864	191.685	70.9412	122.07	140.875	47.1528
	19.8906	53.7763	74.463	15.1139	27.1724	78.8871	189.917	120.611	123.3	136.089	26.9091	17.675	31.5455	30.3509	185.284	72.557	64.1781	76.1286	51.5823
	19	17.2778	71.9265	20.2267	24.1923	70.4805	100.397	87.2597	77.2895	119.5	27.3125	23.3377	19.2368	31.8305	166.342	43.8286	129.897	40.8356	63.0676
	19.0909	72.8767	76.4286	24.3125	21.3919	79.0128	151.623	149.297	131.734	174.452	33.6282	22.6441	22.2727	34.75	208.493	24.3621	84.1216	35.8182	45.2308
	22.0526	56.7436	59.5811	22.6324	30.5373	96.4	154	146.356	76.2931	88.7308	26.1081	25.3288	23.4512	17.25	184.719	57.8143	118.962	144.524	61.3235
	15.2162	47.7067	73.7368	17.6667	20.4127	38.6061	147.729	156.621	121.375	136.013	28.9481	22.1125	22.0154	31.9857	138.056	44.9355	101.305	111.192	62.623
	21.7887	51.2105	77.2615	18.6308	42.4366	76.1	175.181	135.631	80.0972	140.042	33.3214	14.1818	20.2405	27.7778	155.438	66.0615	125.203	82.3214	63.6338
	20.2639	60.9873	57.6406	23.2353	28.4487	64.5873	171.937	127.868	129.561	132.214	24.9545	16.8429	23.0685	25.5395	156.375	46.5974	122.514	91.76	63.6316
	25.2656	57.9048	67.8767	18.2	25.3134	88.2586	187.203	114.015	110.041	159.972	25.6154	21.7797	20.3846	26.5897	78.5846	56.7778	95.4561	87.9571	62.3231
	21.0758	76	54.6923	17.4265	26.75	69.2344	107.712	110.139	119.743	157.59	31.7013	20.5065	23.4615	33.4658	170.167	82.359	89.5128	75.2692	67.8961
	17.5584	77.75	77.137	19.4559	28.7077	43.013	177.4	93.678	113.68	172.934	31.0877	21.7534	27.3929	21.0149	206.176	66.9367	44.2113	53.6567	29.1695
	13.5424	5.38028	94.4167	18	17.8611	68.125	140.488	104.983	115.414	94.1167	31.1449	18.5606	23.0526	30	191.338	51.4571	133.286	45.8642	55.8026
	21.3867	59.5333	48.4306	15.9722	23.8814	88.5484	94.0789	123.387	120.039	154.675	31.5536	16.3026	21.05	23.119	164.36	64.8904	101.949	105.763	62.7231
	19.3611	4.7971	26.1013	19.7662	20.6957	84.6806	80.9737	136.893	61.0147	161.343	31.2703	23.1184	23.6452	36.5	177.333	88.1875	116.934	53.175	67.3506
	20.4384	24.3623	85.6883	18.3056	25.4615	47.4805	144.013	138.633	106.702	125.91	17.7237	24.7681	20.6724	23.8841	130.383	66.7792	81.2034	93.04	41.7949
	22.2179	34.1343	35.7436	21.7288	14.9559	76.5758	147.732	61.5375	133.569	83.0921	18.6712	24.1875	21.8788	18.9091	193.487	59.026	112.222	62.6912	85.7097
	20.3065	13.9452	74.6857	18.9275	26.6842	91.5333	156.314	96.1452	104.483	71.5921	37.3333	22	20.5	27.6282	168.316	56.2031	90.4783	88.2609	44.0143
	19.24	32.4	74.7763	20.7321	24.9828	86.6716	137.426	164.39	122.061	127.671	28.9467	24.4615	18.1067	24.541	185.014	46.9863	113.848	70.2188	61.6761
	19.3026	28.4286	31.1017	16.8182	18.3553	61.2787	159.134	67.3448	127.947	132.607	22.1538	17.6724	23.791	29.7391	68.7143	54.3099	67.9873	34.3478	67.1867
	18.8701	37.2222	78.5517	17.5211	21.6885	28.9306	145.122	146.914	105.931	140.106	29.642	14.4459	23.4638	14.4091	172.129	50.6207	120.391	88.0789	68.194
	15.75	39.5556	86.8481	21.0125	20.2807	90.1493	168.922	77.7667	116.418	122.956	27.1918	22.8841	24.6438	30.8806	176.316	60.3158	70.9385	83.5	69.5
	19.975	39.5077	47.6957	16.3143	24.3026	96.0423	189.731	70.3333	83.32	141.323	34.3966	28.1231	24.0253	20.9178	64.1972	66.5753	80.3235	158.815	54.9839
	26.8308	22.0896	59.875	19.875	20.8356	73.9437	183.753	141.955	102.273	128.644	30.7662	22.5522	26.7538	29.9718	193.77	55.1449	99.6441	70.6667	57.0513
	18.6528	38.1644	53.6835	17.9857	22.5606	31.7763	141.899	110.868	150.938	153.632	25.6964	23.2034	19.0759	16.6849	77.8857	67.0351	92.641	41.3671	49.7179
	20.2687	30.7333	63.5484	19.7662	29.7703	86.519	108.96	57.0161	85.3816	172.559	22.3521	22.3235	22.6143	18.3418	172.615	63.9492	34.5313	76.3247	87.9367
	16.6447	31	50.2361	17.7286	29.1695	63.5769	191.554	125.617	109.711	166.219	28.2267	23.4828	23.5946	26.7077	173.55	66.6842	100.797	67.125	58.5077
	19.8592	32.863	39.2836	19.3548	23.3239	75.6579	205.697	93.5714	120.521	126.203	26.9848	23.1563	23.7692	24.4776	178.176	64.0877	84.0649	91.2857	61.875
	16.8276	24.5167	50.9231	24.7097	23.9718	84.8082	166.845	65.7931	60.7869	96.6712	22.5588	20.325	21.45	24.9697	190.409	32.2639	101.125	71.2373	53.7671
	19.8621	30.9833	52	23.3333	24.3056	98.4189	134.392	77.7458	114.31	175.185	28.1067	24.8596	21.9091	31.8644	158.62	32.2805	96.7286	101.438	61.1948
	27.2586	37.3377	47.1143	15.8472	26.974	91.4853	180.531	67.6667	107.871	189.382	29.871	24.2329	23.2857	25.9	181.469	50.4342	98.0517	104.638	79.2414
	22.0154	37.4225	63.8356	21.6567	23	63.5385	167.584	119.613	147.132	149.986	31.4487	23.6667	20.8462	22.6308	150.824	65.95	99.8026	67.5125	36.6203
	25.65	31.7222	28.6104	16.8667	18.5	62.7031	196.324	68.9718	104.409	118.962	27.7808	30.875	25.141	22.6308	174.125	76.6579	90.0779	128.881	69.4464
	18.8235	47.0536	71.1467	18.3421	23.9103	60.9848	213.217	74.5854	123.623	166.825	27	23.5167	20.2687	21.2535	61.7069	82.3881	44.4744	62.8088	39.1528
	15.2258	31.1481	61.8814	18.6061	21.9	86.1487	177.861	82.9286	115.692	150.273	33.8267	22.1311	19.875	27.4118	185.676	65.0256	117.38	50.7308	60.9178
	23.5833	36.8451	62.629	21.25	23.3768	71.013	176.82	75.4507	119.169	177.716	25.5652	23.1818	25.5352	21.1538	173.372	20.3611	87.5584	92.4079	46.5238
	23.0274	23.1646	61.4531	18.6857	21.7792	53.8378	133.646	92.0833	90.0263	197.867	26.8243	23.4559	20.4231	24.7681	51.8955	65.1733	94.973	83.3889	43.7857
	20	15.2344	68.4933	18.6	23.5362	51.377	162.553	95.4058	128.908	160.15	20.4103	14.3913	17.5584	19.4625	173.117	63.642	111.07	83.7213	39.0133
	20.8243	35	25.9714	15.7733	17.8286	92.9012	187.086	94.8312	70.4133	158.984	18	25.9589	25.0938	27.5893	182.486	57.8125	80.3247	48.6892	55.72
	20.6883	27.8289	56.7692	17.625	19.2373	93.3333	187.913	110.863	53.9403	117.173	35.3833	20.806	21.7813	26.3667	95.8082	32.5079	103.077	93.4024	43.9524
	21.1385	25.8696	57.5949	14.9747	26.6709	74.75	145.968	61.8868	132.721	144.461	32.5278	25.443	19.3433	23.9701	181.538	95.6441	79.8393	87.5085	36.4098
	18.4118	26.2319	68.1053	17.6571	40.45	93.0156	121.769	77.6667	133.293	169.571	24.629	26.48	24.6761	22.7705	165	62.7297	114.03	94.3158	74.3117
	24.2167	30.9178	56.7361	16.9167	28.6184	72.6712	112.829	105.753	95.4032	175.329	15.2911	21.6375	21.7143	34.3973	179.108	68.1111	31.1129	97.569	78.3671
	47.431	33.4179	58.1852	16.3088	24.2658	59.4231	150.932	69.5965	107.295	128.952	19.5763	21.7903	22.8904	14.5571	159.333	71.6154	104.355	60.2273	41.2985
	24.3333	47.3056	120.362	16.2025	26.2394	68.2179	140.147	115.033	90.527	108.077	20.0649	19.3944	19.2714	26.1538	187.949	67.6835	115.537	73.8831	39.2368
	30.9359	25.6269	75.431	15.9403	20.5231	94.2857	176.329	134.831	87.9359	99.4286	24.3621	26.9265	32.625	28.7391	197.053	72.0385	39.8205	91.1806	36.28
	27.2321	25.7101	51.359	16.975	15.8448	37.5833	172.761	118.523	149.8	134.508	14.2381	28.7059	26.6667	25.2195	204.173	57.525	42.3239	81	61.8
	29.1594	35.9444	54	17.7273	26.0147	62.8243	156.214	102.892	98.4561	125.456	35.7778	19.5	25.0536	28.6761	178.722	67.2069	74.8026	80.5882	37.3867
	38.2759	47.4	25.6216	17.7213	23.3056	79.7879	128.115	148.761	61.6351	158.747	22.25	27.3559	25.3562	23.0526	145.405	56.4833	107.153	97.2615	40.5256
	39.7342	34.875	77.1447	13.7391	29.8816	95.6329	165.033	133.932	123.295	156.522	19.9494	27.0676	31.4783	28.8293	209.567	97.0847	84.1558	68.1791	53.0952
	27.8525	34.5676	26.5694	19.6957	23.8382	79.4706	171.467	100.926	80.3108	141.518	20.3194	18.7627	32.1579	22.0921	185.82	83.9231	87.8806	144.952	65.8393
	31.25	47.0685	80.6923	20.0563	22.0702	95.6552	141.35	113.41	90.3443	111.13	26.5	23.6494	34.8219	34.7761	112.323	91.5278	103.262	84.9254	46.5195
	27.697	16.1449	69.0308	18.6842	30.05	94.2545	90.3846	124.141	100.26	148.966	27.6757	21.3	25.0462	23.2949	176.262	110.206	37.871	99.6133	51.6133
	34.7895	39.3514	38.3171	22.3684	33.85	82.1558	42.9661	136	90.7797	153.271	26.9492	22.6528	28.0571	32.6892	182.329	114.848	107.843	139.266	51.8939
	41.0263	31.4615	56.7792	15.5932	29.8378	111.627	172.557	94.2154	80.3623	125.417	17.5541	23.0704	20.3571	26.9859	160.859	76.6308	92.8333	61.5313	45.7091
	23.5147	26.7333	69.4521	17.9722	21.2353	89.4872	185.517	152.185	44.1733	79.8718	29.3115	27.7727	29.0127	24.5526	193.182	85.8529	107.526	130.088	44.4194
	38.6164	27.7759	63.3793	22.9306	16.3333	105.06	187.377	151.656	109.852	37.9667	24.5694	24.4875	26.6667	20.4868	135.885	87.4795	81.8305	77.4203	79.2667
	46.3636	23.2083	60.0167	25.6164	16.1525	105.821	131.734	128.711	98.3	156.647	28.8077	23.8701	24.9492	24.5098	176.359	70.0769	103.575	79.2237	39.8169
	28.2179	22.1667	44.1912	20.8592	19.1538	109.803	157.757	107.972	143.618	166.879	31.1772	24.5325	28.4878	22.3289	160.912	98.7051	124.637	54.1892	43.1944
	24.0806	26.6207	26.7333	17.3284	13.0536	70.8644	182.702	63.4561	110.92	172.343	19.2785	21.6389	29.7089	21.4098	182.333	87.8553	43.2344	87.4189	92.7533
	28.4833	25.1053	53.4868	20.6842	16.2716	105.093	175.236	109.984	114.113	137.273	33.7571	16.6212	28.2031	37.5672	176.714	96.8871	79.8873	101.485	66.5968
	31.3143	20.026	49.8551	14.0959	41.25	105.338	164.688	142.111	97.425	164.911	27.3621	21.4576	31	20.6111	184.342	38.5085	39.1493	71.6081	71.075
	42.0811	20.5455	58.7534	17.6351	22.6774	103.481	167.985	108.044	88.35	157.169	36.5	24.6269	26.1216	18.525	203.776	77.6709	107.59	74.0886	63.4627
	42.0132	26.8611	86.0139	20.9459	23.6951	95.3485	143.205	110.069	74.8125	148.547	27.4737	24.5385	26.35	26.0769	149.662	96.3239	82.1389	92.1774	61.4429
	33.6438	31.3115	41.7324	18.3667	25.7101	112.633	147.5	144.797	93.3538	150.212	24.9355	21.7792	30.4605	26.6364	204.275	85.0976	100.259	83.7123	60.8947
	32.1429	38.825	51.0294	18.8636	22.3824	88.7714	131.169	113.098	86.141	131.387	20.3519	21.803	26.2532	25.1772	153.787	100.475	99.1282	131.714	72.9231
	33.1061	39.3291	86.6333	16.8077	22	77.0933	175.987	164.785	93.6667	134.59	25.9487	17.7833	28.6875	25.6833	182.725	82.3797	92.8219	74.7333	46.5424
	26.35	39.3448	60.8246	20.6308	26.1207	92.5833	109.466	46.8767	113.127	115.87	24.3385	27.4026	23.7105	26.2308	97.1299	72.3506	83.2564	85.4821	67.2034
	31.1625	25.6716	46.1	19.9016	24.6071	80.9483	165.42	112.767	107.835	157.784	24.5897	26.6452	30.8194	24.3846	178.596	99.7368	99.6034	81.6494	60
	32.7808	34.5833	47.7313	18.6962	24.3919	102.294	170.271	126.81	121.413	97.431	33.0139	21.6709	33.7059	26.7857	155.551	70.8971	112.613	92.6	86.55
	29.1039	28.7647	61.7089	15.831	21.0556	86.0411	154.547	139.973	123.056	149.367	32.1728	26.8065	29.2759	36.0441	189.343	103.3	88.4203	105.6	54.9875
	32.35	39.4561	40.6364	18.8727	21.2241	92.3117	74.5085	140.789	101.486	153.78	33.6282	23.8214	27.4937	25.1892	183.154	82.3816	88.6393	84.5077	52.9577
	39.2639	39.2	70.5696	16.9706	30.375	77.6229	163.273	128.747	97.4746	138.84	24.3684	19.3881	23.375	38.2571	140.574	125.72	94.0411	162.364	54.4568
	29.4545	35.5692	41.4138	19.9859	34.25	98.5972	164.623	122.691	71.6456	65.0345	18.1081	24.2241	29.4531	32.1343	190.78	99.4028	63.6308	63.082	72.6316
	26.8714	28.8983	91.7917	21.4627	37.0385	79.6829	177.864	90.9545	91.8701	149.574	29.7097	22.8966	23	27.2241	158.266	89.9189	94.9855	88.7059	36.0185
	35.3243	46.1176	31.4306	18.4286	14.1625	70.5424	145.095	122.987	130.608	146.083	25.5238	13.4714	29.525	25.6104	148.987	125.583	83.1892	140.875	102.859
	37	31.6842	58.4493	14.7833	29.9444	90.1129	187.878	84.169	98.2083	164.182	22.9385	19.8947	30.3333	26.9342	176.145	67.8571	83.5833	62.0986	39.4627
	43.7237	35.2692	54.1127	18.4342	23.6552	83.8108	117.458	122.932	85.5195	128.397	27.2143	19.2105	28.1304	23	177.427	65.5593	91.6308	31.3797	67.2329
	33.4194	20.6724	64.3056	19.6615	18.0694	82.9863	179.958	118.382	112.013	170.597	20.2532	22.2632	16.7222	24.4321	176.286	94.7361	87.5636	31.2857	70.2133
	36.2857	28.7586	50.4545	16.1392	17.6571	92.7662	153.26	100.032	86.1154	103.806	25.1316	19.1282	21.6974	22.8594	165.672	123.662	123.661	59.7193	62.7397
	30.459	24.5588	59.0308	17.0299	21.4407	80.2821	123.305	101.281	96.5231	162.972	17.0351	26.873	27.8082	23.2716	181.571	78.4384	80.8442	67.8026	51.2857
	33.0694	29.0133	84.7297	17.0127	31.2459	87.75	182.522	115.744	29.15	140.729	21.5714	21.5139	27.5333	24.0811	147.267	87.2467	38.1125	169.538	58.5763
	35.6102	26.7273	44.5493	20.6623	62.3117	104.206	179.094	124.684	26.2532	108.966	23.9091	27.3065	29.1692	24.975	198.178	76.1139	86.6081	53.9559	66.9041
	21.7467	35.1829	50.9211	18.5536	44.0556	80.76	184.531	122.567	89.5424	165.814	24.7458	20.1579	35.7031	17	186.303	31.8289	93.8861	29.3026	43.7581
	40.8462	33.8816	60.5493	18.6974	40.0267	74.4531	183.787	130.8	40.4407	160.667	22.8696	26.08	31.75	33.4821	201.012	92.2817	90.6133	25.6944	45.0455
	27.7313	32.6441	103.026	17.8485	25.3514	87.8194	163.466	137.984	126.519	167.563	22.0959	26.3247	23.6769	24.8889	171.397	109.642	91.2368	34.6111	66.9833
	32.141	25.2353	67.1169	23.05	41.9706	109.07	142.362	112.875	81.6833	167.803	24.6282	25.1316	31.5882	27.4416	172.014	69.5867	36.2603	28.5844	64.8261
	29.7763	25.0833	61.4051	14.9865	53.9836	77.3607	165.705	101.794	85.2568	145.763	28.9595	24.5672	29.5063	16.2133	175.656	91.6949	96.88	70.9333	54.7931
	27.4237	46.5915	93.8814	17.3433	38.2143	93.1774	164.855	123.138	27.5	127.569	26.8889	19.6061	30.6667	27.8987	69.359	85.9394	45.8718	25.5	65.15
	25.9114	41.8194	25.9286	18.3871	45.5333	84.806	166.526	54.6607	8.26667	147.932	25.9481	22.7778	26.0303	29.12	206.724	90.069	99.1333	49.4416	29.803
	23.8696	41.6316	61.3833	16.8551	32.1667	109.639	176.683	111.623	5.79747	156.228	21.6833	16.3151	21.0882	24.5789	206.957	100.044	93.7167	14.2687	69.6835
	32.026	24.4133	75.1029	19.4583	40.1125	84.2923	136.887	153.718	118.53	149.408	25.5441	22.7576	31.4177	27.2368	173.081	74.129	96.6203	28.8261	68.5443
	33.1467	32.481	84.6765	20.2308	32.4615	106.84	120.529	117.232	144.537	159.317	22.8246	26.6333	30.5085	31.9231	170.954	101.825	94.1034	99.8276	70.0862
	28.8082	21.7662	62.475	18.5263	32.85	72.3875	157.872	133.4	115.426	120.311	16.4875	20.7606	25.7763	19.48	50.9615	94.1864	109.273	19.1515	65.7973
	44.0635	29.9315	89.0256	22.5932	28.641	92.5373	172.068	96.2464	120.108	106.94	27.5738	25.6338	31.1646	35.3662	129.116	78.2951	74.2083	49.8481	76.9322
	38.8077	24.2703	61.5714	18.6349	19.8276	95.6933	124.713	136.711	59.3718	139.797	29.45	27.25	29.8026	31.6269	193.026	106.026	83.5333	26.5667	68.2368
	43.1429	20.7971	85.082	18.8689	32.6154	93.75	177.508	87.5556	111	154.432	23.9091	21.6119	27.0563	25.8625	199.577	109.797	98.8421	31.1905	59.1039
	34.9836	34.1	68.0135	19.942	53.5625	71.2105	188.381	43.2676	63.197	111.432	26.0921	28.4714	31.8406	23.1392	165.65	90.5833	88.026	22.1429	57.2778
	28.0256	35.0476	86.95	22.4118	40.6897	87.0128	161.949	59.0769	116.603	158.417	30.7576	22.3333	28.2763	12.8116	158.41	38.1169	127.122	37.7414	50.1013
	24.9359	23.9859	95.2692	17.8143	32.082	75.7121	142.114	120.705	139.507	174.032	29.6364	20.7973	24.0625	37.4384	71.2895	77.069	107.362	32.825	55.6724
	31.3333	40.3621	73.6765	23.4875	28.6533	77.7397	185.725	103.4	90.1912	144.61	19.9516	22.1688	28.4833	24.7077	164.256	110.8	100.264	46	49.1343
	34.7059	30	85.4146	20.8971	37.3205	87.4084	170.329	143.458	89.6842	126.527	25.6923	20.9136	30.15	26.3077	192.907	58.5974	105.145	65.4545	65.0435
	35.95	24.3485	71.6575	19.038	39.4462	81.9655	169.145	106.314	130.474	167.338	26.4615	23.4923	24.141	28.6026	144.464	107.355	133.25	35.4583	58.6933
	30.459	25.5405	39.5156	19.4915	20.6098	82.8553	166.74	116.661	90.9014	152.7	26.0139	21.7857	28.7746	27.1538	185.015	70.8929	110.423	29.8219	58.131
	32.7838	19.7368	79.0282	24.1884	56.3974	52.5	112.569	143.107	52.8103	152.547	25.1707	20.0364	30.4366	21.4429	172.177	74.7571	104.733	29.6441	72.7089
	32.1039	28.3651	45.4655	19.8889	52.697	70.9315	205.179	107.362	68.7975	152.692	21.2297	24.6102	26.1846	43.7468	191.125	95.527	42.9615	21.9853	79.9178
	25.9403	26.0972	76.3333	22.2188	49.459	106.468	180.671	102.029	62.5429	99.9231	21.4304	25.08	25.9853	31.1795	170.719	94.1408	124.671	27.775	63.7941
	25.2353	36.625	66.9855	16.1343	40.0179	51.75	93.4143	55.2206	103.1	188.244	26.8272	27.2754	32.625	32.32	220.971	74	101.013	36.4615	56.8971
	40.5625	27.5942	39.9123	20.7429	51.6552	43.5254	133.716	118.478	135.159	163.237	18.1321	20.0923	30.1392	37.0769	219.35	116.817	90.7246	21.5	64.5714
	35.9125	23.1692	85.3562	18.3243	33.7342	53.4935	161.915	121.273	81.5574	82.5286	33.4348	23.3205	26.15	20.8395	205.397	64.0656	96.4412	43.9194	54.7945
	31.8429	20.8421	89.6056	20.9118	37.0441	24.9667	169.259	109.925	47.1486	118.676	27.9231	22.5263	27.8551	20.3125	193.041	74.6842	103.716	55.1594	79.4247
	32.8929	18.5541	50.9872	13.8088	42.0149	51.5224	150	107.65	88.2273	144.695	29.1842	25.3521	28.2208	36.3803	158.017	81.9123	72.5342	29.1646	106.553
	36.2857	26.25	111.39	18.8387	38.597	49.6087	173.875	123.182	42.7436	152.172	14.8026	19.9403	26.0658	18.8276	186.667	103.042	81.7424	56.3291	61.6538
	44.2973	25.7467	78.5522	21.961	35.2692	29.3571	180.217	112.348	141.164	135.07	29.7627	26.5897	32.5	32.8734	193.521	111.2	72.0959	28.6721	52.4247
	29.25	31.375	82.4783	18.3784	25.5606	74.507	164.839	98.7246	124.909	156.637	25.4085	22.7231	32.9315	40.7067	186.41	34.4304	94.7826	58.0986	52.45
	43.7671	17.4688	90.7887	18.6951	38.3377	85.4167	142.467	115.545	91.3544	164.6	31.6753	27.8696	30.9024	28.6613	165.696	86.2143	98.9375	29.0959	72.1746
	50.5733	23.962	33.8514	18.5789	26.3636	58.0959	175.392	129.425	138.159	147.268	21.0694	16.9014	26.7342	29.1688	179.817	82.25	101.847	100.452	66.2712
	43.4091	25.303	97.9125	23.1176	25.2787	56.4091	162.211	136.585	118.75	126.04	25.3291	18.6125	23.0769	39.3043	136.5	119.828	88	86.8824	67.6
	28.7143	22.7	56.75	20.8167	40.125	61.5893	174.237	131.157	139.145	156.584	31.225	23.6154	26.7467	28.3919	142.478	104.679	94.9595	33.859	48.9324
	37.0441	8.55385	56.5714	22.2875	41.9744	88.4595	191.356	78.4516	107.64	147.486	24.3919	23.0714	28.2571	28.6795	30.0769	112.672	82.6835	50.0714	29.5875
	29.3684	21.3421	85.0779	18.125	28.1974	67.9444	192.968	134.779	114.613	157.829	21.5857	24.9737	24.3699	20.3378	39.519	115.875	99.7429	14.0897	49.04
	30.6	20.1282	94.6301	23.92	26.35	60.1081	194.397	63.918	90.2692	174.237	26.3846	22	21.8684	26.6471	39.6066	66.8281	98.6842	98.4857	64.8358
	33.15	17.6267	54.9167	23.1045	37.3594	96.2414	160.197	94.6111	133.863	177.937	35.6949	27.5065	30.7051	23.025	195.8	105.345	110.04	34.5128	59.9114
	34.7534	23.5395	76.589	17.1739	23.0152	38.871	179.2	125.162	48.1579	177.641	26.2059	24.2338	27.557	21.24	44.3684	70.5625	91.5733	30.8814	60.2778
	35.4324	20.5522	72.3286	18.5513	27.2078	72.8167	112.603	137.233	143.765	161.313	29.1772	26.7759	29.6765	35.9589	71.9846	89.1923	105.344	35.9565	69.6219
	41	18.4407	80.4655	21.7458	34.5294	67.7794	102.38	89.9333	97.4177	143.286	38.2375	21.6667	32.338	28.8831	155.667	84.425	93.2329	31.7778	65.3333
	34.2763	16.8594	62.9853	20.3833	46.4118	93.9296	27.8448	125.2	122.855	99.5844	24.9538	19.6724	27.8947	24.9385	170.917	89.3968	106.3	30.2576	66.4545
	36.1639	23.875	111.159	16.5294	30.4444	59.6984	36.9836	118.737	97.2703	90.4937	27.7826	18.4182	24.1899	36.7703	195.461	74.8667	80.3478	31.9634	54.1014
	31.6964	16.8846	121.803	15.4211	43.3704	79.4737	16.9077	117.794	123.68	24.4828	29.3243	14.6857	29.3117	13.6557	40.4744	65.2857	103.986	26.3281	55.4219
	28.8108	16.0506	76.3235	22.4531	38.9825	98.4615	16.3	130.532	144.434	32.6393	24.2857	27.4098	32.0526	30.3636	55.4634	68.8438	120.397	73.1167	49.8354
	30.0641	19.5263	73.8955	22.9194	30.6528	68.9211	16.411	139.25	129.203	14.9385	24.623	19.3333	30.4521	27.0896	130.406	76.0132	121.921	48.9524	68.0667
	21.8358	14.5152	77.026	15.7237	33.5676	62.3182	32.3659	117.785	109.329	14.6667	24.0294	19.7125	26.9744	25.3014	186.621	78.4638	111.185	41.0641	59.9508
	33.3333	17.4286	100.772	21.1304	23.8846	86.9394	85.7759	107.259	87.3117	14.3333	23.5763	27.7647	24.8194	25.974	186.208	30.7195	51.2687	28.5167	53.9474
	34.6618	14.2097	85.9875	19.3676	47.973	68.3043	40.9821	115.264	42.5541	28.5366	22.8784	21.3281	26.4286	28.2923	221	118.564	104.048	27.1944	59.039
	25.3827	19.3816	88.3038	15.9444	35.6709	93.8696	32.9474	125.07	154.328	75.7586	28.5714	26.2	26.4189	29.2833	139.375	114.225	89.6709	25.3284	49.7027
	42.2394	20.9701	59.4262	19.2895	54.9706	81.1098	18.3239	85.8036	94.4872	34.6724	27.3766	22.1754	26.2931	25.2969	225.289	73.3462	41.4412	29.4308	54.64
	41.3014	16.2241	99.5179	13.7632	50.8553	92.3462	51.9375	136.343	132.127	29.6	21.7407	22.2154	30.8947	26.0182	149.608	78.2069	61.45	20.7344	53.6842
	34.7581	15.9559	75.5556	17.4648	41	71.2625	20.5833	104.153	153.379	15.7361	25.973	23.6133	31.1067	30.4306	196.241	76.3824	84.1918	22.4167	65.6324
	48.8103	22.6974	96.027	17.4795	39.7833	78.9846	21.2429	149.918	155.013	45.5063	21.6429	24.3375	27.322	22.1714	162.5	115.855	125.139	54.5735	84.6875
	43.5526	21.7051	59.557	16.9692	37.4416	80.6	19.8696	130.133	114.711	18.0822	28.6885	24.8608	28.129	37.6538	214.818	89.0725	94.1067	39.2581	63.9041
	34.1846	16.8788	52.5714	19.5424	54.3088	73.6936	32	117.696	132.507	17.6567	33.0769	15.6282	29.1282	22.6667	73.5714	107.747	78.0441	21.2468	55.8235
	23.5938	20.25	103.262	17.6471	34.6349	89.9079	24.6563	121.111	132.819	28.3438	29.7308	27.614	30.9444	26.6271	185.077	87.0149	130.684	19.9821	52.1186
	33.141	18.8846	49.5625	20.1918	22.3026	76.875	27.726	106.483	42.5593	21.5231	24.9153	26.3667	28.1605	19.4722	188.873	67.1972	83.2817	36.125	78.2727
	41.5439	16.7937	80	22.95	26.9688	82.8481	21.1538	122.324	139.661	24.8194	23.8406	24.4198	26.9275	23.3333	182.014	37.5741	146.233	26.0536	67.1594
	39.8289	19.7581	79.7143	19.2453	25.7808	72.9385	20	111.542	90.8276	18.8701	24.087	26.4058	28.5652	29.4462	197.982	85.2069	119.304	43.4262	71.5526
	36.9825	21.5303	67.541	21.4928	39.5875	78.5641	18.3571	133.018	93.9178	17.4583	30.0286	27.519	33.961	24.7419	185.205	99.7123	125.686	34.2295	65.2361
	36.1842	18.9265	90.1111	22.0615	32.8387	81.7576	19.6333	91.5714	127.227	16.4167	27.3867	23.038	26.6761	22.2899	183.643	70.3016	84.507	24.0286	43.4872
	32.1429	20.7414	78.3889	20.2676	36	60.2239	79.0462	133.2	66.2279	18.3393	24.75	26.3676	26.4231	29.6857	206.179	75.3333	107.379	90.7895	83.0972
	34.8793	14.0278	67.3544	13.8356	44.96	93.7941	36.3919	113.903	104.541	68.4308	21.3548	27.2321	24.8082	24.169	188.446	84.3766	82.8841	40.7792	53.8689
	28.4533	14.1897	57.2179	21.8375	47.7222	82.2	22.8732	106.237	147.632	32.1918	24.25	26.9667	27.1867	26.2368	183.125	68.6964	93.5916	15.4667	52.6842
	30.7895	30.5246	62.5441	16.5143	67.6949	75.0127	31.4667	126.393	118.4	19.5658	26.5085	26.5373	26.5556	30.5556	196.641	77.9298	120.564	21.8548	41.9726
	35.1842	15.1392	57.1471	14.4444	56.9016	83.4714	27.0833	139.414	118.821	27.7333	18.3165	22.8354	24.1111	24.3333	200.493	127.253	88.7121	54.2857	61.3231
	36.4242	20.3607	77.7887	13.8714	25.5652	70.1143	20.8429	136.268	78	24.0676	26.9857	24.3415	29.3662	22.2222	204.117	76.1852	130.562	113.128	34.726
	30.8553	22.3559	95.6842	16.6538	39.4844	92.7143	19.274	111.4	134.882	18.4507	20.3514	18.8393	35.303	20.8608	173.714	133.507	60.9825	31.7	67.8393
	30.0678	17.0875	76.5949	18.2295	45.75	95.6094	17.1618	98.082	88.197	16.8873	19.1646	20.7143	23.5797	23.9324	167.985	92.4615	107.378	44.1528	63.0545
	34.1447	14.507	58.9342	16.6615	45.0164	76.2125	40.4143	98	131.89	15.2029	22.8125	30.5714	30.026	27.3896	164.667	124.671	117.1	31.7143	70.7721
	25.8533	16.7162	35.4714	24.0571	45.5811	69	35.6026	120.573	124.39	34.75	37.6579	22.6133	31.4722	23.4051	216.983	70.625	106.725	45.013	41.9474
	30.8197	13.4583	64.6143	22.4688	15.6393	81.1184	22.3896	121.074	122.104	31.6623	29.6232	29.4744	26.1268	25.8276	216.644	123.848	95.2154	34.6933	69.8571
	33.9744	21.7848	36.5882	22.4561	33.9104	76	18.7286	98.1695	144.221	20.1467	21.4643	25.0175	29.8961	28.0517	204.557	72.8659	89.7121	21.9063	60.8214
	40.5769	22.4531	73.3974	19.6912	37.125	96.6719	25.8696	46.2308	163.949	16.3014	35.9452	24.5172	27.5696	28.2329	101.087	74.1875	109.667	46.9114	67.7625
	30.1711	15.1061	116.895	16.5921	28.5614	74.4179	23.0781	137.224	141.375	22.6812	25.4615	27.5833	28.1558	24.7612	153.531	92.6719	106.351	40.45	77.9333
	40.5195	22.9697	110.909	16.6438	42.803	83.2462	19.6102	140.746	93.8	20.4576	24.3659	25.0395	26.5	30.1772	196.903	43.4795	109.107	27.5556	58.8727
	35.1455	14.4412	73.193	21.1111	28.2712	64.7544	24.4	118.27	47.8101	16.8333	22.6892	22.791	24.619	19.8158	185.539	84.4359	121.181	16.7778	70.9118
	26.7945	17.4156	37.3243	24.3676	22.8095	76.3333	67.3014	60.5938	68.0641	21.7568	34.1642	24.0649	29.4058	26.6986	205.158	66.5172	82.7222	24.475	35.0429
	28.0519	17.25	76.6667	22.5833	28.2759	75.2	81.5735	136.649	135.731	59.7465	25.0704	24.1077	30.5132	24.4203	210.911	92.8088	91.1642	22.5641	52.0923
	29.3714	12.662	57.1159	24.6957	28.0758	67.8333	47.2414	100.833	117.014	70.9545	27.7969	28.8361	32.7538	20.3288	201.637	93.0921	109.389	27.5694	58.7692
	35.6111	26.5263	51.5224	18.9273	41.1549	37.2097	81.3418	97.5857	114.213	41.5862	22.5667	22	26.4098	26.7639	59.8621	95.3506	92.1625	60.7125	68.6379
	32	30.3014	36.2206	18.6897	66.254	71.7679	29.1449	97.6119	137.305	72.6154	24.7436	24.9275	24.9565	26.6316	48.4865	133.448	108.833	87.7792	55.6212
	25.7973	16.2917	75.8101	23.0962	32.2308	70.3731	109.558	117.961	111.969	25.8116	20.8393	28.8026	26.8987	20.8769	52.1486	69.5286	123.861	21	59.0159
	38.375	15.3125	57.3974	21.3889	46.6234	84.4286	21.1471	79.8611	125.013	95.84	31.2687	20.5395	28.4531	21.2969	179.267	50.8525	94.026	29.5692	21.6604
	35.7	19.4571	71.0667	24.9383	22.7692	93.1212	84.9231	41.7237	143.219	18.5507	30.9571	23.519	25.2464	26.791	203.406	85.6081	46.12	42.1746	35.5273
	34.375	17.5854	68.7794	22.7564	36.9429	66.6667	22.7703	146.929	52.5797	75.0385	25.6667	23.1194	27.2152	18.8125	175.915	31.6623	70.2286	30	77.8305
	51.2405	15.4154	86	21.9167	36	80.8833	27.7324	38.1159	142.886	20.1486	30.1034	24.026	29.5507	26.7895	191.975	78.4655	120.625	27.4348	53.4375
	37.3333	11.1607	114.592	17.6883	26.6721	81.1212	41.9672	132.014	85.8824	24.48	26.5067	24.803	25.2969	20.1385	215.635	111.802	86.7031	17.6375	54.4615
	35.3056	11.9221	27.9868	15.7308	38	95.2949	30.5645	109.833	121.592	37.05	19.4571	26.25	22.8772	22.6866	199.471	84.3846	110.026	26.7714	83.9859
	29.6875	24.1515	82.013	17.2647	37.5	75.8571	38.5909	47.2714	132.014	27.4754	22.325	23.8308	27.6615	20.4474	60.1176	108.8	102.172	37.7895	58.7662
	34.4247	18.2436	44.6842	15.614	25.8718	88.9333	29.3919	110.25	128.968	34.3385	25.0164	18.5789	29.8219	23.3871	80.0556	103.31	120.829	39.4783	45.6324
	40.0769	18.7	63.1356	15.9385	30.1014	74.2676	39.4375	130.724	126.831	26.0135	23.05	18.6076	29.2911	22.8676	210.681	65.863	100.878	66.2133	51.25
	32.8082	13.9818	63.7971	15.8545	23.0833	66.1111	25.125	103.264	126.03	34.962	17.85	23.0759	27.1429	24.5593	72.7342	97.1096	106.788	34.3898	42.9846
	40.6076	20.4085	87.7143	19.3514	35.25	76.1081	30.8816	123.458	112.738	22.2321	21.4429	28.6579	26.3818	24.8065	198.53	113.395	36.7143	14.2632	67.9459
	37.5205	16.0606	94.6234	21.6582	31.3951	54.7089	139.769	120.377	134.276	27.25	32.1967	29.5467	28.6567	20.0317	201.74	105.491	123.689	30.0735	50.6765
	44.1875	16.6935	112.949	18.5921	36.8734	61.2105	106.928	112.014	125.592	94.5652	24.6111	20.4722	27.7237	25.5763	157.775	105.412	127.754	37.4615	43.0462
	35.726	17.3966	72.6216	18.7353	31.2133	69.8235	126.571	109.517	133.962	112.391	34.6456	25.7143	25.3429	25.4559	212.574	103.873	143.475	34.3214	31.875
	31.8226	11.2727	72.5179	20.1867	35.6081	75.2162	119.203	125.864	47.2143	106.711	23.9	23.3291	33.0886	29.5417	204.368	71.6184	90.9726	46.2969	60.5692
	44.1455	13.6087	54.058	27.4286	45.1169	70.2759	74.6842	122.088	149.288	65.5	28.6866	26.6615	28.95	21.5075	177.283	88.3117	114.753	103.467	33.1286
	41.8571	20.7302	107.418	24.2055	39.05	77.7162	69.3544	64.0429	119.347	61.3333	29.0167	29.3377	28.4304	32.3333	48.5211	70.1186	93.4286	66.4182	92.0517
	35.375	18.8608	69.7222	18.4571	30.7532	64.1061	108.765	125.365	150.957	96.3088	34.029	24.0526	16.5278	24.4412	115.74	91.1282	92.8833	42.0933	49.9143
	40.7391	11.7403	96.25	17.3421	37.9474	70.1194	92.0167	122.405	65.1266	79.2131	27.1707	26.0789	29.9242	26.5714	217.75	105.081	106.729	73.9178	52.6835
	48.4026	14.0847	68.7721	16.7436	27.5652	73.4107	44.7606	97.7237	62.1571	39.3623	31.0769	21.1	25.0667	24.2222	201.833	71.6094	41.3623	69.9359	62.3393
	24.9211	18.2561	52.5217	23.7797	33.359	93.2414	89.5303	116.871	147.686	79.2576	28.0946	23.8816	26.1013	23.9667	61.5932	82.2833	109.042	35.8421	64.0423
	30.5	13.9143	70.3333	15.8615	26.4933	91.8571	98.3971	98.8354	150.455	87	28.6615	23.0172	26.8514	26.2785	50.3784	95.9474	38.5732	25.3377	46.169
	28.6711	16.6329	68.7917	17.0641	30	82.0758	79.3143	128.76	111.164	70.0429	26.1622	21.6071	27.1519	20.9571	205.921	53.9091	102.731	20.8983	108.17
	34.8136	18.3188	56.7188	20.2143	37.7945	90.5405	66.35	125.15	137.127	70.0909	36.4058	22.4935	25.3377	21.493	117.845	82.2949	117	28.1875	52.5769
	31.0139	18.3521	105.193	17.1067	38.3281	79.6857	79.2909	92.2879	97.4286	102.365	30.0253	25.0323	27.0896	22.9867	194.059	77.1094	123.118	104.167	44.9714
	35.1	18.8052	77.2381	21.0769	27.0617	97.597	115.302	136.707	141.544	53.7759	26.2667	24.026	27.7975	22.1143	218.345	112.754	42.1724	23.9342	42.0462
	34.2603	19.4167	81.3947	23.6721	36.6986	93.8028	61.6441	111.244	100.805	64.5493	29.9231	22.0893	23.8676	26.597	194.425	97.2778	92.7719	32.8833	55.5
	41.8701	18.9054	78.6418	20.9024	48.4098	73.5143	72.1892	111.321	152.316	80.2195	19.8571	26.2632	29.1311	23.6234	176.365	82.0533	103.154	25.4795	54.575
	36.68	13.9733	57.2833	21.3448	64.2895	68.3718	90.6585	121.275	143.122	109.35	28.1867	29.0375	29.4328	23.5135	171.27	79.2754	105.786	29.1471	49.5132
	32.3377	20.5588	80.3056	21.2545	59.403	59.9114	124.38	140.471	71.9143	53.4211	24.8767	29.931	28.5373	26.2237	185.473	88.5571	124.885	79.5974	67.2778
	30.4828	16.2456	49.8621	13.527	56.4211	48.1286	114.897	63	142.486	21.5692	25.6379	25.5513	21.1806	15.7714	197.707	35.4328	94.7632	37.6607	33.6377
	41.7922	12.2125	45.1719	21.1974	66.0172	65.16	60.4386	64.1228	105.043	101.829	26.7419	28.1935	24.7206	23.3649	162.816	79.6709	100.26	94.1429	66.6866
	34.9429	19	58.8649	20.7077	52.6271	77.8125	23.6364	127.898	50.8228	74.9315	26.8831	21.871	29.6377	18.6056	187.103	73.9649	43.3636	42.1795	66.4247
	29.6667	17.791	65.7	20.2838	42.1316	68.2615	114.92	111.379	130.5	106.944	25.5974	26.25	28.9359	21.4286	194.924	67.1692	94.2317	62.6761	70.209
	25.1923	10.4444	68.6667	21.5385	55.9853	51.1356	84.8219	128.887	139	68.9194	14.9452	20.8861	29.2125	26.0313	221.685	80.5079	88.5069	27.2143	35.1831
	28.6623	14.4744	74.7692	16.6579	35.641	76.0339	120.271	98.7333	98.527	101.785	22.5938	21.4576	27.8714	23.284	202.4	89.9861	32.9577	70.4058	38.4706
	30.942	15.5802	49.8987	22.6557	44.5714	76.1695	78.2857	127.577	164.238	76	15.5147	25.7838	27.6071	15.0769	227.984	81.2405	100.268	86.5522	44.9487
	35.1351	15.8734	63.0649	22.0435	30.8375	46.3571	85.75	69.1846	142.682	20.7647	22.2692	20.7333	30.807	22.0658	199.714	75.9552	78.2222	17.9872	85.1585
	32.4167	21.0282	21.5085	22.5405	43.7324	74.1884	23.6567	93.7308	138.62	89.5536	25.4933	20.6667	36.4571	19.493	210.276	107.429	88.1579	24.2667	50.55
	33.4545	13.6364	63.913	19.4643	49.2368	74.9492	99.8276	124.029	118.579	27.1757	27.1857	26.2794	18.1864	29.0571	197.253	89.8472	61.6034	93.5479	147.75
	27.5897	10.6379	60.7241	26.431	28.8734	85.9067	31.1781	113	48.3939	24.4857	21.6129	19.807	29.1316	26.2568	202.561	76.0429	95	38.2319	31.1781
	23.2632	16.8611	18.8987	16.8182	30.2206	91.9487	27.6571	164.347	119.637	107.203	25.36	23.7143	29.45	29.5641	171.342	38.2368	99.3485	70.2208	118.704
	32.0328	8.94545	64.1487	12.3562	74.6795	44.4828	119.973	123.716	129.06	15.6866	20.4655	19.7627	28.7313	18.0303	192.433	71.5625	71.5263	61.2879	97.7662
	36.1613	10.6164	32.8261	18.6333	59.5439	76.9524	17.8429	112.105	67.4407	32.0658	21.4677	23.6232	28.2083	24.9429	216.365	35.0274	89.4107	42.197	104.725
	39.4857	16.4531	50.4242	21.0263	85.9265	74.7123	36.3026	119.585	101.328	32.2533	27.2063	19.4857	24.1667	19.5345	203.268	96.5362	104.538	36.2763	115.162
	28.9342	21.8841	50.6071	21.3425	53.4935	71.6667	37.1806	129.123	159.542	18.4667	22.5278	24.9605	19.1111	21.5	209.325	63.5972	113.769	37.4	100.945
	33.4058	13.6935	53.4375	20.597	67.3846	65.5	20.974	123.651	104.744	3.64789	27.0286	22.7625	24.75	19.28	154.939	54.4937	108.284	23.5938	111.533
	28.1711	18.1711	69.3	15.0685	52.9559	45.3056	4.17143	122.838	61.0845	113.696	32.9118	18.9118	29.5244	23.037	184.209	93.2055	100.62	26.0133	132.149
	35.5694	11.6667	31.1594	18.4559	71.197	40.2368	126.807	101.662	166.477	47.7317	19.4789	23.913	28	23.8033	207.721	67.8333	90.5088	31.2424	149.938
	23.2179	10.4177	54.803	26.5256	42.076	84.4177	54.0732	126.276	106.042	54.1039	19.5278	21.5	19.8684	17.3797	181.55	83.9178	90.4098	81.5867	126.429
	24.0462	12.9867	91	19.026	56.076	49.0563	61.2162	133.38	135.266	83.3513	24.7105	17.7213	23.9605	24.7297	168.194	28.5811	101.576	29.0492	57.4605
	37.525	20.1143	27.0893	18.7797	33.7895	48.9	94.2933	62.2321	101.421	46.8986	29.5513	19.2051	28.8333	28.5	177.129	59.3462	97.6923	28.3117	118.319
	28.3824	16.9324	46.7733	20.6207	57.6615	47.0395	52.4348	119.958	116.448	100.106	24.7246	21.3537	31.5821	18.1449	202.23	80.6216	136.911	64.0411	105.05
	27.6753	10.0921	52.7288	24.6102	50.7188	88.8714	112.879	127.85	117.579	107.535	22.9079	22.4925	29.1892	27.0175	59.2174	70.0143	93.1765	21.0448	99.386
	25.4189	12.3462	38.7922	16.7925	42.5634	84.4474	120.718	129.113	142.758	81.7949	22.4868	22.2258	29.8667	24.8378	190.571	65.3771	64.3771	94.9459	155.308
	31.3438	22.5658	66.2	23.4118	43.9487	106.513	93.4304	85.875	133.355	80.359	21.5062	26.3108	30.7857	16.9	187.481	113.87	108.561	32.6557	98.7286
	29.7031	16.8364	62.5135	15.5439	59.0909	63.5714	90.5641	158.184	88.35	78.7143	16.8308	26.9524	21.8448	18.4576	206.348	83.5897	99.9737	87.9041	138.947
	32.8108	13.3333	65.9857	15.6538	61.6885	78.6167	89.5065	106.184	151.394	167.507	29.3846	23.0845	28.303	28.4143	86.2034	70.2625	111.392	32.859	36.2407
	42.575	13.3714	46.1379	18.0714	22.5522	60.05	184.903	115.438	105.576	97.8395	23.4861	20.9028	29.1688	28.6795	159.631	105.962	91.1618	19.6119	56.3846
	24.7123	13.3043	68.6216	22.039	43.0893	63.8382	110.825	96.3559	116.359	58.614	26.1739	21.9821	28.2055	26.2564	177.062	73.3333	121.027	32.5541	111.257
	18.9634	14.7805	49.2985	20.6324	51.5507	71.1899	66.386	122.289	108.831	114.347	23.1067	24.4194	26.9868	22.625	144.297	34.9103	95.3974	32.8933	52.8814
	30.9351	10.9831	52.5443	16.5125	47.4643	76.8333	130.013	151.192	165.469	33.2676	26.4828	20.7213	23.569	16.5152	188.277	84.3704	57.4928	67.6528	49.2152
	36.875	18.2321	77.0694	19.7206	33.5256	72.5395	37.375	127.823	122.6	45.6087	22.5147	20.8133	29.5417	29.0833	189.84	67.9697	36.6528	106.078	94.7089
	22.5974	16.25	59.4559	16.2609	54.8472	48.9	51.7246	56.0685	113.897	106.198	23.1389	19.4219	26.7733	18.1316	173.439	97.4545	87.0862	95.0588	67.9322
	35.6486	15.4658	77.4154	25.5846	47.8205	91.4407	131.868	118.081	138.064	117.355	20.5696	17.3115	23.6	14.2222	175.805	41.1936	120.747	37.0154	41.8986
	36.3043	13.8393	49.8814	18.7625	74.6567	40.7213	88.3649	96.8462	111.238	78.7027	30.375	23.197	33.9	29.5424	151.968	78.3421	69.9872	2.625	28.8361
	27.45	12.9265	53.6377	16.3636	21.1324	41.9333	40.971	130.12	137	36.1594	23.4605	24.0676	28.4156	21.1974	214.597	90.8228	70.1029	22.0806	146.687
	29.1642	11.1333	42.3455	20.6618	51.7424	72.5455	36.8108	120.815	76.6212	31.9054	29.1625	21.3088	25.9412	13.3239	168.292	34.6582	117.164	106.119	130.5
	25.2951	11.7302	58.3284	24.4375	80.6765	76.4655	70.0897	116.877	136.864	62.0658	22.5417	22.1867	29.9	15.8194	212.861	90.6329	105.078	21.3571	142.547
	20.5867	11.7297	45.1781	20.3636	58.5	81.6333	70.5135	103.493	159.553	63.0405	25.4865	21.5139	24.3896	21.2208	207.105	70.2368	82.1667	5.325	103.929
	35.88	16.1385	49.8793	21.7759	46.3857	37.3382	92.1875	99.5082	129.421	82.0641	28.5641	22.3714	33.9589	22.4304	143.726	76.4912	101.115	36.3387	134.26
	30.3571	13.9355	77.2	18.2787	48.3333	46.6786	132.4	96	162.554	117.786	20.56	21.641	36.9265	18.4359	166.829	56.8182	82.7467	31.9342	49.6557
	39.7463	9.3421	65	19.561	30.5156	71.3875	83.9385	140.015	96.0897	74.2615	22.8438	26.7179	33.3151	13.0704	183.919	34.961	91.1967	86	60.2373
	34.9565	13.9481	37.1733	19.1235	48.65	49.6308	83.5672	133.532	163.985	73.8358	25.1875	22.377	28.7805	20.2258	151.646	83.8833	116.538	43	139.468
	25.2133	13.4655	61.1228	20.9753	37.7215	79.1806	132.359	116.514	160.576	120.323	22.5538	25.175	23.0385	15.3816	194.662	29.3582	54.0357	137.403	121.814
	28.7018	11.5775	65.3582	15.7143	47.8824	55.2951	123.061	121.074	111.792	109.169	23.0303	24.3291	25.6716	23.141	201.922	30.1711	68.5441	80.557	134.582
	26.15	13.3485	65.9189	18.082	25.7403	93.3108	102.948	54.0959	150.647	91.4576	25.0278	19.6087	36.2679	15.8276	178.938	61.6027	92.7344	137.833	108.841
	27.2267	18.3636	51.2143	16.4	53.7973	60.2281	35.3125	107.785	110.25	30.4531	27.6727	21.5065	30.2632	16.5775	164.734	114.933	102.833	48.64	55.5882
	30.6056	17.3553	78.7468	19.5	62.3509	64.3276	127.305	145.114	146.663	110.298	21.5156	21.0253	32.8214	24.5278	217.169	55.5	90.3625	36.4783	87.8923
	27.8732	17.3418	86.2353	20.7125	64.8909	73.1493	146.176	102.75	125.589	129.406	20.0972	22.0135	29.5658	20.9744	150.508	35.5128	97.6438	115.2	44.0145
	28.2338	14.3108	26.8987	19.7733	49.3788	79.35	203.649	126.582	91.8481	188.93	24.8088	19.9706	32.7123	19.3235	191.072	87.3571	81.7414	40.2	119.143
	22.8375	12.5362	48.8095	25	48.1579	87.1333	30	115.958	101.281	26.4714	25.6707	16.8889	25.0345	18.0968	170.768	86.6167	96.4603	104.125	106.534
	28.4658	15.6909	62.2817	15.6324	52.4722	100.125	83.1667	115.914	112.4	73.5833	21.3485	23.6857	32.3291	26.2903	198.816	72.8846	109.694	64.4923	117.227
	23.5417	14.1216	27.1406	16.5286	55.2568	80.9375	74.6533	133.778	43.0877	66.0133	30.4487	16.0635	28.4286	24.9	210.58	81.5846	100.321	30.5333	43.8
	19.6667	16.6949	71.5395	18.2321	40.2152	93.6667	62.3165	141.397	108.936	55.6538	25.1143	20.5694	31.0769	22.1563	180.831	80.2794	34.1392	46.5	42.2321
	28.2982	15.4667	53.4872	18.8169	67.0132	50.7237	127.758	106.737	164.947	115.167	29.8026	21.9296	29.7344	24.4545	218.478	72.0676	100.444	33.1558	118.411
	22.3692	12.0886	59.0714	20.6056	58.3165	73.4035	138.684	127.231	122.033	125.862	29.9846	27.8077	31.2319	24.1558	69.8919	96.0375	35.725	25.9636	122.731
	20.974	16.557	43.0746	21.5263	61.5789	68.9333	168.351	105.403	95.8919	154.081	23.1127	21.6119	24.4138	15.6429	203.833	44.5968	102.575	70.9412	98.84
	23.8108	13.5254	40.2029	19.6154	63.0395	78.0333	96.2857	126.683	151.92	85.1	18.6167	18.6579	26.8197	25.2973	200.836	59.9487	86.6986	96.3333	41.0263
	26.1875	17.8378	42.1017	17.5132	50.9296	84.8101	183.571	127.279	55.8611	164.266	15.527	20.6333	28.339	22.3966	189.362	58.7895	118.643	97.3478	48.8052
	21.7869	10.8852	55.4231	19.3385	56.4079	85.8289	117.658	111.671	108.58	104.276	16.0641	21.1184	24.8333	21.6557	89.0959	64.8667	99.5733	24.0405	136.91
	26.5522	15.2346	90.5616	20.557	70.6724	52.3906	110.737	134.035	106.431	96.9231	24.5844	14.3235	25.1067	16.5821	189.809	58.2432	82.0811	40.7027	85.6
	23.9718	15.7167	101.883	18.3974	55.8955	74.9737	67.1404	145.033	167.361	60.1724	24.5	17.9028	27.8333	21.6104	169.564	88.9103	96.8676	135.676	39.0517
	28.623	17.5735	56.2615	21.8939	39.1304	35.1406	156.803	117.405	107.932	141.894	18.3467	22.25	25.875	16.7162	137.671	63.9831	97.9737	50.7612	56.9
	23.7662	15.275	56.5375	24.3281	29.9	69.9	152.135	160.596	31.7564	137.699	19.8429	18.8182	38.9559	22.8933	161.172	81.625	112.816	29.2877	106.182
	20.8553	15.4487	40.0375	18.8644	27.4324	81.5541	169.773	98.5588	139.013	154.767	20.6944	14.5517	27.1538	22.3091	186.466	81.4156	95.5789	27.141	43.0127
	21.0822	12.5088	43.9242	18	35.3051	92.7922	141.633	99.5875	173.382	127.372	20.1795	17.9041	27.7059	24.4714	209.517	93.7703	77.8906	86.3875	54.9643
	22	13	58.7895	14.5862	67.0313	62.2533	88.9667	133.898	116.833	78.6833	22.0986	24.0455	29.6486	13.1111	156.712	91.7385	75.9464	87.3784	136.635
	20.0769	9.53086	57.803	17.8816	58.7778	76.1964	93.8649	132.897	138.239	83.3425	18.6557	16.0152	25.3438	20.8438	193.797	89.4754	112.281	121.97	89.2368
	28.3077	10	60.8333	16.9615	67.3165	74.2877	54.3529	119.609	159.82	47.9412	21.1714	23.9636	27.6711	22.7719	162.409	126.111	99.1447	31.2361	69.5641
	24.1867	14.8596	54.5949	20.0423	67.25	61.7973	75.6026	105.414	107.027	66.4684	22.9104	21.039	33.4595	19.9054	183.753	106.662	113.162	87.2361	47.0893
	25.1194	13.8611	32.6267	20.6724	53.1667	65.0448	72.2059	138.773	101.8	63.4328	18.4706	20.32	28.3279	24.2714	154.236	101.875	110.154	149.256	81.8696
	18.791	16.3816	65.6286	23.3387	64.2297	83.7164	100	61.3793	32.0667	89.04	16.7067	15.5263	33.1094	18.7308	170.566	124.969	96.3393	149.842	101.211
	28.2179	14.6027	44.3429	21.1806	64.1739	95.3919	96.2	145.679	94.1875	85.8571	19.2278	20.3974	24.35	29.4355	212.737	122.049	83.038	86.8696	65.1884
	20.679	13.2923	38.859	19.3562	40.2794	71.3333	117.896	129.063	98.3529	104.818	20.4776	25.0536	33.2237	27.4487	218.149	99.375	59.1639	38.961	39.3284
	17.5625	14.0333	65.3621	14.3086	62.0897	40.5373	121.987	148.341	110.1	108.211	20.1311	19.7792	22.7083	23.2727	196.069	131.919	88.3824	68.0597	41.5085
	25.3692	13.9367	37.3043	14.2568	39.7564	67.5526	68.1447	121.589	31.1207	60.0933	23.5893	23.7119	30.9844	21.3239	195.143	104.393	33.5574	32.0877	122.156
	20.2105	12.95	69.25	16.9067	22.0746	63.5263	117.329	98.3014	137.534	102.696	15.2787	25.4828	29.8451	17.4932	184.517	120.459	86.9733	151.724	82
	30.321	15.6582	38.9701	16.5362	61.0167	63.0606	105.177	127.971	58.0274	93.1148	21.8276	21.9048	30.4714	25.48	190.062	105.754	48.3117	29.4394	45.5972
	20.8961	11.6184	101	17.359	52.3385	76.5658	150.293	137.311	140.123	134.8	20.9636	18.2319	30.6076	24.0448	199.8	110.662	119.563	33.6462	95.9167
	22.1429	8.21333	57.1618	16.7297	41.7848	80.6027	82.6324	89.3913	158.324	72.8143	19.7895	19.7586	24.4068	19.4	193.679	95.3036	76.4595	28.6949	42.3966
	27.9	14.0441	68.3571	18.6575	40.7368	27.6585	111.776	137.791	115.746	98.7895	19.1781	19.0678	26.8983	18.3968	171.481	98.8	50.2414	125.145	101.584
	23.1392	9.89655	19	19.7018	36.1273	77.05	141.971	129.558	115.274	128.652	17.0411	18.9275	24.3621	21.7705	81.1746	69.9747	77.8281	125.938	44.1964
	23.0299	12.0959	46.65	18.6607	35.9583	36.1429	144.872	140.734	84.5802	128.5	19.1139	21.4493	26.4063	27.9155	113.092	95.9103	104.086	149.895	94.9474
	19.5147	11.4833	50.4412	22	42.2029	54.2239	170.075	131.73	90.5735	156.405	22.2807	17.9242	23.5362	27.3333	198.691	68.4051	81.5942	115.27	47
	21.5063	17.2105	47.8889	18.6351	66.2439	73.2361	55.1343	63.45	171.838	48.9394	18.4583	22.2	30.9444	22.0769	206.853	92.1228	95.8064	64.8182	80.2
	22.4627	12.962	64.9853	18.557	47.2533	87.0385	79.1818	136.262	134.421	70.9324	20.0725	22.12	27.5513	17.0128	210.033	70.1053	98.9077	139.807	40.3676
	25.6897	13.8571	59.589	19.5063	60.8333	87.9333	96.6104	130.363	125.792	85.0127	20.7042	25.0256	30.0606	18.3205	174.5	79.3333	100.625	79.9265	52.3117
	20.7436	13.4937	42.2899	13.6883	46.2432	97.5893	56.4138	127.552	43.3875	49.8793	22.8088	20.575	33.175	16.7286	159.356	62.1311	67.3934	78.9494	82.1358
	23.2295	9.97059	72.7639	14.6974	59.1899	92.5526	62.9014	129.845	113.692	55.6522	16.8246	18.9577	32.0282	21.1154	194.823	80.0536	103.08	155.831	40.141
	22.589	14.137	45.075	17.9737	57.7308	92.6271	151.179	128.616	114.885	136.325	23.4935	22.8548	29.6933	22.9178	63.0732	117.708	98.5769	101.076	127.974
	25.3896	11.1493	49.303	17.0128	47.6061	73.3056	92.0526	113.378	123.684	81.3026	21.1316	22.6071	27.0164	13.4412	113.14	107.303	114.763	182.559	58.6765
	19.8056	11.3768	47.2899	16.8246	38.9189	93.4179	117.086	136.739	38.025	103.577	21.2105	20.25	19.4125	27.0299	191.564	95.3562	108.154	140.932	52.0253
	29.0122	13.2308	48.3929	16.8649	36.3846	88.4225	108.042	137.746	91.1944	95.5352	23.6625	10.0676	23.0606	25.5972	207.076	126.377	100.589	169.414	41.525
	25.625	13.1579	47.2597	20.0263	61.4068	98.1447	123.592	125.815	79.9032	109.029	19.0986	20.6885	34.2687	24.5294	193.808	82.4262	96.8289	127.879	23.8246
	22.2222	11.7031	74.3158	22.1897	64.0923	79.4935	113.257	158.197	95.2078	102	20.7536	21.3429	27.8642	21.2667	78.8	98.5897	108.425	73.6892	35.0959
	15.8167	11.2656	43.3038	19.5753	40.6622	88.7344	124.4	143.571	116.949	109.914	17.6104	20.7213	24.1017	17.5789	186.2	100.432	124.108	91.0385	119.684
	24.8246	12.4242	71.697	20.2222	43.0896	88.1525	124.644	115.863	84.069	112.606	22.1184	13.5246	31.1154	20.3649	176.113	102.905	80.4805	33.3636	82.4853
	19.2208	14.4333	61.2586	14.9014	49.6143	88.1071	131.293	130.074	101.304	116.653	21.5932	22.7966	24.6349	25.6267	190.826	85.0694	96.2927	67.0132	68.6173
	23.0946	12.7143	78.4138	24.6761	45.5455	72.08	122.982	141.187	53.589	108.914	21.169	19.3729	31.375	27.7027	172.383	77.6053	110.205	112.367	59.371
	22.5507	11.08	37.2321	16.32	43.5217	88.9492	143.656	110.415	115.519	128.547	18.5063	18.7703	25.4219	22.2576	169.056	55.6406	92.8875	198.654	120.9
	22.5333	11.1944	66.08	16.8955	46.8571	58.9138	135.466	144.14	102.263	120.345	23.2895	21.2667	29.6582	19.7286	189.469	91.9571	89.4203	135.605	123.622
	24.8933	13.5507	82.5507	20.7297	46.7051	82.8974	96.2542	120.746	129.966	85.661	17.1972	20.3143	28.4286	22.2055	168.405	109.217	120.471	130.581	78.3167
	19.2419	10.6167	68.3521	15.2917	52.0909	66.5231	68.2279	134.429	111.647	60.4744	21.35	19.8305	25.5797	26.6818	172.747	107.044	96.5429	141.776	84.5946
	18.2833	14.375	50.1692	17.3143	38.775	95.4	65.7288	114.241	72.5916	58.2034	24.0725	18.2	30.5513	21.8636	193.05	131.563	48.6026	128.238	53.15
	20.987	13.7625	57.8816	16.2787	53.7432	82.1169	101.031	137	58.3429	88.4032	25.8413	21.7049	29.7246	23.2394	179.658	88.8513	103.41	96.1757	99.9722
	27.4231	12.3067	23.6885	20.325	67.6429	82.557	88.7246	104.132	106.377	79.6129	14.3529	27.0172	25.2615	26.7414	171.813	103.634	80.9846	115.924	48.4304
	24.0159	14.3621	44.3833	15.1846	53.125	69.8228	112.864	107.77	110.792	100	19.1299	21.1447	29.2532	18.0759	169.012	34.661	80.1587	146.519	35.6543
	24.6032	12.1667	48.3421	20.2658	47.6	87.2687	90.6545	97.0149	145.757	80.8246	19.7414	23.1379	26.4	19.6753	84.9492	110.913	92.5658	144.661	33.9701
	23.6026	11.2899	43.24	18.0833	61.9296	69.339	177.351	108.649	162.07	160.571	18.9259	18.1311	28.7794	20.2763	194.875	103.914	98.4194	78	59.6441
	28.7821	10.039	57.4167	14.7636	48.2025	42.7679	167.253	107.107	152.654	155.962	20.2727	23.2254	27.0656	18.5672	196.12	135.917	45.7625	155.597	42.9322
	26.443	13.2025	56.4342	19.5	46.987	105.141	69.6125	118.827	57.3649	61.5	24.6957	24.7321	33.3043	22.2794	173.471	89.2154	109.466	141.733	45.375
	20.7215	13.1429	56.0294	18.5286	54.9444	80.0833	154.25	122.468	83.9259	137.851	21.2083	22.9863	31.5946	22.8701	7.18841	69.2203	79.5692	98.4	32.6066
	23.3929	13.5286	50.6667	17.75	54.9359	74.7119	82.9333	122.016	143.265	73.7917	21.082	17.8788	21.8378	21.7273	210.514	109.446	105.746	76.9437	86.4286
	23.4744	11.9016	31.2941	20.7821	57.5088	93.1974	41.726	142.186	166.045	36.7	19.9492	22.3833	30.3175	19.5893	172.175	114.565	86.3108	57.3418	118.908
	24.254	9.74286	78.5493	18.3043	51.9857	87.6875	116.987	99.4054	144.795	104.547	18.1563	16.5139	26.9351	22.0132	6.93443	117.891	82.2133	145.656	49.2532
	20.662	11.7333	60.0694	19.1944	61.4839	109.833	126.689	114.355	121.829	112.1	20.7722	18	26.1791	23.7321	6.08333	102.493	102.691	141.103	51.3433
	28.8667	7.71667	45.3544	18.3803	43.4098	66.4828	117.405	146.116	115.556	104.61	19.6053	20.3906	30.5522	20.7018	136.052	129.709	99.5	147.457	91.6375
	22.2113	13.875	68.7969	20.5345	38.9531	81.3205	104.532	112.615	65.8871	130.494	18.3393	24.0128	26.125	22.9706	203.017	110.25	126.029	144.075	86.0423
	17.9467	25.2432	39.2895	18.6711	33.7333	77.3448	116.101	118.122	70.6582	91.0323	22.2714	21.1471	22.0938	24.3676	131.158	151.466	96.5405	126.516	45.8
	29.4342	33.4375	74.0526	16.9643	52.6563	77.087	155.342	143.912	86.5769	103.986	20.3846	19.1587	27.45	23.6	144.2	142.221	49.6623	177.097	108.231
	22.5946	40.137	60.08	20.3333	55.6271	63.0172	124.667	127.289	135.986	139.481	20.8333	20.2833	27.7179	19.7297	46.6622	84.4848	118.7	127.805	107.044
	27.029	38.0556	53.8793	19.8929	32.0676	44.3	42.5763	126.141	91.5429	110.196	16.5	21.0364	34.3947	21.8987	65.0141	87.1818	107.122	145.392	49.942
	15.7353	60.2807	89.6883	18.5	56.0533	53.25	47.3562	101.623	120.184	37.623	25.9692	21.2152	24.0704	22.2394	130.2	120.836	113.421	88.8462	31.2241
	22.2206	30.7647	30.4211	15.7361	61.3898	81.2	43.1857	61.4857	65.8133	42.4225	20.3924	22.8784	26.8983	21.0323	170.371	78.3833	110.77	134.333	74.0862
	25.5714	80.7895	44.6301	19.1333	35.7424	104.118	89.4189	111.054	110.534	36.5429	17.2727	17.8919	26.8592	19.4058	180.111	116.597	128.403	87.2769	39.375
	18.7333	89.7879	39.1111	16.1733	60.9118	67.4667	114.087	118.39	119.397	78.726	19.0897	19.2368	29.2059	23.3766	195.42	77.9474	85.6866	26.1167	41.5079
	20.4638	72.9155	96.2182	16.8689	47.0714	85.0625	97.4138	123.8	136.317	100.462	23.1333	23.4375	26.3108	19.5821	64.44	80.2464	120.203	135.918	30.0133
	23.4483	65.04	50.1159	17.5441	48.5614	74.0658	88.5211	116.485	127.243	88.2373	22.1772	18.45	32.7089	23.55	131.9	54.4737	89.3	106.293	61.8312
	23.4805	29.9483	36.9744	20.1739	60.3182	86.2683	51.2414	56.9583	66.9605	79.2727	23.2468	19.7179	31.9483	19.0299	102.829	120.23	86.7895	137.597	79.169
	25.7018	56.9873	65.6974	20.4853	28.0274	85.3594	93.2308	119.584	118.429	45.2931	25.6316	16.0526	30.6957	22.7143	176.944	83.0526	36.6164	108.803	34.7361
	22.4203	51.2154	75.64	20.1818	25.931	64.5395	125.589	125.191	51.2368	82.8308	18.7385	18.3733	26.3718	15.7931	131.658	75.2241	104.672	98.6154	82.8846
	14.3966	89.2692	51.3846	16.9481	37.6786	80.8333	126.315	129.475	133.671	111.964	26.7971	20.8857	25.1447	21.3385	194.1	82.0492	105.19	106.887	57.5
	21.675	66.1563	35.2625	15.8462	44.2687	89.1194	138.056	118.355	150.165	113.236	19.9875	15.339	25.9041	25.403	178.403	97.7013	110.071	140.299	55.0476
	18.5125	82.3636	31.8846	18.6709	34.3939	72.3607	52.2133	119.742	166.775	122.377	21.125	23.8088	22.7848	14.2742	147.973	88.0274	109.405	131.986	140.086
	22	68.3513	47.5556	20.1216	57.3243	72.7656	114.902	158.473	97.4848	45.7368	22.6875	13.8833	24.0513	20.2368	165.456	82.6	119.37	31.2034	72.8986
	23.8769	68.6316	58.9394	18.6034	27.5366	101.127	150.458	130.304	175.628	100.196	19.5	25	24.9672	23.6111	205.697	116.896	106.235	101.317	49.0862
	16.7042	29.24	82.0127	16.9655	63.5946	76.8333	144.018	157.857	128.421	135.449	24.8806	21.8136	25.5357	21.8933	204.731	78.1818	118.672	137.776	132.573
	21.2683	94.3974	59.6575	19.1733	51.1333	89.0154	79.7534	127.844	116.571	131.964	26.0725	21	24.7922	23.2375	177.081	77.9189	85.1286	140.23	50.525
	23.2785	87.026	53.5443	18.4487	58.0182	71.4231	120.778	115.25	144.315	70.3425	17.7705	17.5	25.8873	13.8267	149.155	94.6623	100.585	149.677	70.1212
	24.662	82.8833	60.9841	13.8649	48.1667	77.8718	124.78	106.698	47.9107	106.722	17.72	18.0769	28	20.8056	177.141	88.9494	115.986	108.617	58.0154
	23	67.1452	51.3919	15.7662	35.5902	86.4667	163.098	54.7931	101.984	110.579	18.0526	16.2692	26.8158	18.137	163.229	79.7206	29.4429	137.754	162
	22.9429	59.8158	36.5588	17.4848	50.4359	58.1525	118.056	106.779	108.69	145.967	20.0615	21.7692	31.0714	24.5714	189.145	127.824	127.6	127.127	54.1039
	18.4833	61.3377	49.675	21.9538	58.2716	87.5714	34.8906	122.986	156.896	105.014	21.8451	23.5833	23.85	21.9221	180.214	91.95	96.9559	141.304	64.875
	20.1014	79.8642	58.3947	15.5286	83.9577	107.882	121.693	121.855	132.435	30.85	21.0556	19.5658	27.4912	13.4286	192.197	118.366	85.3333	162.831	55.7813
	23.4909	36.942	54.3939	23.55	34.6143	60.4063	42.8772	143.141	113.415	107.632	25.2542	19.9306	31.3623	22.0606	184.917	103.609	107.19	139.472	56.9683
	20.8902	60.6933	49.7059	17.2456	49.3766	96.1385	128.37	102.645	118.623	37.6842	24.1094	19.1	24.9275	17.8684	187.368	135.658	32.6667	104.724	110.426
	23.4675	30.6061	42.4459	19.1757	64.2857	99.0769	138.771	110.515	172.295	113.597	21.1806	16.4444	29.2	20.194	169.667	37.5373	98.2253	106.585	46.8966
	27.6154	84.7538	53.3793	17.4769	54.4429	78.7089	96.8833	122.658	108.247	123.971	23.4872	18.7647	22.726	21.1429	163.547	72.75	31.2414	146.579	120.62
	25.0513	63.7059	33	15.1176	65.3788	104.821	109.592	117.211	120.544	84.0667	22.9344	12.8857	28.6071	21.141	177.118	112.782	25.9552	125.017	142.615
	21.8514	83.8462	24.7241	16.6923	62.9733	85.3519	163.116	148.553	159.493	97.4342	19	17.4416	29.481	24.3158	199.652	150.1	100.628	145.886	108.5
	23.0256	125.623	48.4286	17.5526	54.8033	96.4444	144.526	65.4091	158.277	147.652	18.2405	19.1053	29.2436	21.1852	181.068	91.925	114.485	82.9437	149.516
	23.3	73.5	23.3333	15.8125	74.806	85.0132	91.7703	141.25	160.894	130.263	21.5811	14.5303	32.3377	17.3718	175.205	82.6579	26.3538	147.731	52.1077
	26.4026	83.431	67.6933	19.6491	62.2222	60.5172	45.5758	116.6	156.974	80.4667	17.3784	19.975	22.2623	17.8333	179.385	82.4512	74.0833	137.214	84.3378
	24.0147	95.0617	81.8793	21.9571	63.8714	55.8	104.07	152.077	140.41	40	22.6623	20.1667	22.942	15.5286	162.091	87.7895	31.338	129.638	124.346
	19.8077	88.0125	40.4545	21.2985	34.7746	77.7059	54	118.736	181.247	88.5357	19.6203	18.0132	30.6901	22.7077	164.932	120.293	94.9538	24.8	120.506
	20.9412	62.3625	59.1818	19	33.65	66.9211	148.481	76.76	110.455	47.6833	21.3387	20.1324	25.5	17.625	198.108	88.1538	101.949	131.207	114.492
	24.7895	95.6618	61.8136	15	34.0253	94.791	74.7333	136.231	134.613	133.089	18.4324	19.5738	21.7612	18.6667	193.325	78.5526	74.4603	139.826	46.6835
	22.6769	58.459	71.2031	19.9231	67.5823	84.0635	123.451	83.6389	180.314	67.6892	16.3623	21.2468	27.9872	18	167.569	155.534	131.317	86.9077	52.1772
	21.7838	70	51.569	18.5526	44.924	84.6557	66.6026	132.306	157.415	108.611	17.8625	20.0822	28.1045	19.75	200.615	74.2113	115.75	184.113	49.9474
	22.6582	93.8727	29.4478	13.25	66.8358	64.7468	48.9531	110.451	50.1594	56.4815	25.0139	19.3947	25.3971	20.0563	199.557	108.677	105.707	158.493	38.8974
	17.6582	105.158	22.7097	17.2464	67.3134	72.2319	111.893	73.9242	49.9014	43.7857	17.942	18.1392	36.6833	17.3594	80.2794	28.1091	86.4615	52.4429	112.29
	20.3649	69.1169	41.8	15.0641	57.7662	93.95	70.1579	65.7042	180.103	99.7321	17.4868	15.9344	29.7183	19.7632	188.013	71.28	109.155	39.3231	45.9855
	19.6026	77.7895	40.0536	18.5205	64.9836	61.5	101.764	152.52	127.618	61.9221	21.1429	17.5902	24.7846	22.4828	186.654	79.026	117.416	156.534	74.5441
	20.5467	86.2949	54.2571	19.3833	70.641	80.459	147.857	149.474	128.947	90.5479	16.2857	16.5	24.5167	19.4722	173.621	108.186	93.8533	33.0385	42.4366
	21	88.8101	21.3521	15.3766	65.5357	70.4211	110.545	143.307	170.618	131.362	18.1014	19.7013	20.3165	22.8026	157.613	103.164	93.4231	45.8875	43.2987
	25.7237	107.913	45.7662	19.4321	49.1842	70.2857	142.263	140.354	137.795	97.0435	24.2278	22.3699	25.3889	18.0588	203.712	130.862	51.5069	60.0704	124.701
	20.0506	75.7966	39.9079	19.08	71.2368	83.7288	147.584	107.382	170.154	126.468	23.6329	19.3182	34.1481	26.6269	142.329	145.229	118.761	143.658	125.347
	22.5441	57.0286	26.8718	22.5172	56.1111	80.7759	109.267	73.831	168.033	133.221	25.5	20.6282	27.15	20.6053	58.9487	95.5246	106.121	48.2	51.1846
	22.0313	80.5303	20.64	20.9714	23.569	82.9054	87.3117	152.138	160.27	96.7808	18.8082	19.7568	30.4595	17.0154	97.3378	30.6623	85.3621	126.571	49.95
	27.6857	79.65	29.1333	13.8873	44.25	66.3714	162.441	62.2353	166.382	76.7143	19.3108	19.6962	25.4921	17	188.359	37.4286	126.603	127.926	50.6486
	18.5072	32.8696	28.5246	21.3418	73.7917	65.8235	107.787	51.0395	112.475	149.069	18.038	23.8	29.3824	22.6389	135.571	40.9412	108.132	24.6	38.8831
	22.1857	98.7143	20.4746	17.5758	55.8308	72.2987	33.5932	46.5373	141.103	95.1936	18.8302	18.8	28.038	20.0735	183.2	29.8816	104.625	82.6727	60.1579
	22.8289	66.7123	21.129	19.6338	41.0735	76.087	136.593	45.5616	132	29.6441	19.5949	17.7051	29.4744	20.6154	199.797	28.9872	85.0769	79.7069	129.411
	19.8846	71.7215	29.4805	22.75	45.9342	93.1316	36.4783	70.7761	198.938	121.182	21.7612	16.8947	28.1071	23	199.805	28	114.889	83.7568	48.1467
	22.8793	83.3559	19.2319	19.4474	60.7105	89.1343	136.641	137.368	161.345	32.1304	20.6026	16.6795	29.9	23.4925	196.123	36.1014	46.4032	71.1039	152.039
	20.2069	52.3108	19.7975	21.6282	76.1429	87.1667	6.68919	140.447	135.338	120.585	21.5672	19.4868	32.8553	21.6111	188.468	95.1343	78.5085	35.6944	105.029
	23.7467	82.3165	14.9114	15.5867	56.7833	58.3816	6.24615	50.8	134.286	5.94521	17.6753	21.209	25.3906	18.0294	188.051	28.4559	94.8462	142.2	45.4853
	23.8421	78.0156	19.0351	15.3333	28.5857	39.1622	62.8919	106.329	138.292	55.3151	21.3108	22.3857	25.5536	19.8947	169.8	59.5862	103.508	82.339	54.381
	16.2676	77.403	20.8929	22.8421	43.8955	72.2361	68.1081	129.246	189.2	60.2027	18.6076	19.0357	29.6667	21.6933	187.215	58.4478	98.5231	127.13	145.107
	24.058	69.8052	18.0385	19.6984	44.1639	44.5152	184.333	114.081	171.618	166.311	22.8987	23.125	34	20.4464	165.174	29.987	41.5556	149.333	114.193
	19.5278	28.1746	21.9692	20.1905	48.7627	55.4648	113.64	53.029	134.046	101	23.7692	18.4533	27.7375	18.6389	202.534	62.1899	99.6282	47.0862	46.0328
	20.1186	84.9875	11.7101	16.3929	56.8814	45.8676	115.531	131.128	131.986	102.875	19.1948	18.5211	30.8983	22.8514	126.397	30.2055	114.13	153.034	123.833
	24.5062	102.081	25.0746	23.7763	45.3462	61.6129	134.25	149.214	144.434	119.082	20.662	15.0615	26.6282	19.7576	146.081	74.0317	93.274	153.229	59.7069
	23.5513	106.167	23.0278	21.931	66.9538	52.7531	138.066	123.413	164.052	123.213	18.443	22.2658	24.974	19.75	179.054	19.8116	86.6974	119.941	46.6389
	22.9701	81.7179	19.3559	15.3385	66.137	60.1711	126.339	136.276	136.291	112.5	21.0137	21.4754	24.2308	22.6962	133.557	74.4737	117.618	171.07	62.6308
	26.2	68.3562	19.925	23.807	29.3974	45.5846	125.293	72.0175	162.649	112.509	16.425	22.75	26.2877	26.7	105.197	55.4198	113.143	71.5167	110.719
	31.2222	61.3167	19.8	18.2683	59.9848	67.4722	128	139	155.078	113.785	21.0685	19.2903	28.5932	22.7714	170.359	22.4156	108.55	139.686	54.8615
	17.4	23.5974	22.5	17.2059	22.1184	78.1724	144.712	128.304	165.433	130.958	16.2055	18.2152	24.3846	15.625	146.625	52.8889	108.606	58.4848	132.357
	22.7286	73.5652	16.6377	19.9706	24.7586	84.6229	166.23	119.408	34.975	154.295	21.36	14.971	29.527	14.4848	179.303	65.2879	116	113.115	105.205
	22.7632	50.4531	21.4416	19.7778	71.625	72.3	152.518	144.538	47.6835	136.714	23.8356	22.3966	33.6835	22.274	163.591	48.7105	85.1875	87.9605	154.672
	23.0435	49.7703	16.3768	22.0274	23.6212	87.987	155.148	53.3766	27.5405	138.012	24.8088	13.8209	29.6667	14.2027	183.569	78.4583	66.3784	135.143	40.1167
	18.6721	29.0625	19.1528	25.0375	44.1667	36.4328	170.444	64.8261	62.2258	153.917	17.1552	15.6375	20.9014	17.0385	178.679	51.4923	88.4	133.186	35.45
	18.197	60.0781	25.6818	17.1594	55.425	78.1594	145.921	64.1746	23.2875	59.1304	19.2951	19.8438	23.5556	21.5467	159.598	74.7966	72.4533	115.475	38.9821
	24.225	85	22.2368	20.3718	73.7627	77.8088	173.276	118.671	57.475	130.408	19.4154	19.1899	26.2105	26.0313	195.924	65.3671	82.5325	123.909	153.013
	21.7595	75.9167	15.2152	25.4384	44.4545	36.3692	124	76.55	67.2368	157.526	24.9333	21.8986	25.2267	23.8472	147.853	95.9828	69.7333	147.762	83.8228
	20.7586	75.8205	21.5846	18.0769	61.4231	47.0274	169.167	76.1688	60.6	110.883	18.5085	20.25	21.1846	15.7193	156.455	74.7838	73.0811	141.957	49.3667
	22.1774	83.2568	41.4	15	51.4928	61.75	172.056	115.653	33.8	152.026	20.5625	17	28.0278	18.4478	169.353	48.1467	80.0875	125.403	48.9091
	21.9167	73.25	27.8767	18.6757	53.3077	38.9846	61.2456	86.1333	27.875	154.417	23.6769	14.8095	27.4	13.4464	173.232	64.6184	65.4545	125.866	39.8036
	20.4848	93.9231	33.6962	18.8974	36.6111	62.7333	161.464	75.425	50.1389	147.458	18.2667	22.7949	28.5893	16.0702	168.701	29.5333	101.174	106.078	125.787
	24	100.411	29.2973	20.3182	53.1429	74.8852	119.802	122.949	52.1642	120.519	21.7403	18.6935	29.2034	14.7846	188.618	70.3	80.45	78.2179	133.747
	21.3472	83.3699	18.6622	16.6282	30.4853	86.0462	136.987	123.886	62.2206	108.714	20.5781	19.85	32.0253	16.1667	161.15	74.2692	91.2462	107.519	150.333
	23.9841	68.525	37.8116	20.3875	48.5075	72.1692	122.829	140.934	75.2623	93.5882	19.6479	19.2692	35.197	14.1923	195.026	91.0862	79.2763	78.5	32.9375
	22.3038	70.6769	55.3974	23.082	45.7407	64.4127	105	121.985	74.4605	158.544	19.7273	17.1667	30.6667	14.5797	126.845	103.81	54.0286	83.6027	90.322
	23.2727	80.2727	19.9722	17.3077	60.6951	56.7813	176.279	111.859	54.8987	147.4	19.961	17.2078	24.0857	26.7424	203.493	32.7838	88.4627	115.109	65.0339
	21.803	96.4286	29.2909	21.4805	41.1739	70.4744	164.508	137.014	69.5	135.218	20.9583	19.7973	30.3103	12.641	137.228	95.7895	110.984	98.2	108.842
	22.1375	77.8767	23.1014	18.6818	33.9714	54.8767	145.491	62.859	23.5254	150.117	17.25	17.6324	28.7867	21.0139	70.6719	88.6563	63.9545	153.217	34.6711
	20.475	26.0641	26	19.2414	45.6875	63.2647	166.186	58.8846	64.7705	108.885	22.4133	17.3833	32.1053	16.4051	200.862	105.397	90.8209	136.619	32.8205
	19.0133	59.4091	54.3382	21.4844	32.6389	56.625	136.982	103.912	69.9367	120.842	20.661	20.9028	27.9219	25.0988	183.936	76.6301	77.1299	107.969	39.5429
	22.5846	78.4286	40.5789	19.2881	42.9831	74.961	171.039	106.65	56.4839	151.436	21.0615	14.6338	25.8929	17.8571	146.606	85.7031	30.9412	108.195	58.7429
	19.557	89.3165	44.9322	21.4026	71.0923	66.0571	119.338	112.864	23.9444	107.25	21.25	21.9259	31.0423	22.3333	189.225	85.9322	119.297	144.86	39.5538
	24.8933	63.2222	29.5455	20.4627	66.0625	69.0395	66.5	121.63	57.0896	60.8684	21.662	15.569	24.303	19.0704	217.356	102.171	95.5	73.9342	46.7586
	19.3	103.453	28.0972	20.9114	61.5469	48.7073	149.156	97.3714	23.1667	133.844	30.3333	23.4107	30.2432	15.7705	155.701	93.9016	117.324	70.7286	125.025
	25.2414	78.7719	30.8831	19.6447	45.5152	67.987	149.288	112	59.5538	133.525	20.0294	14.9241	28.6087	20.1625	143.525	108.313	66.0441	110.855	35.8553
	21.4286	78.8784	25.6	19.3448	28.6765	75.5949	124.154	86.3194	39.7436	110.5	19.7324	17.4925	32.7375	19.3067	141.231	109.266	117.521	74.4737	42.12
	23.2222	32.3714	60.1923	21.55	47.3924	68.4848	134.675	119.571	66.4366	119.224	19.082	21.2381	30.9821	16.3906	170.765	142.616	98.8133	141.246	39.45
	16.2308	84.791	29.9481	15.5405	48.4386	51.1471	142.149	124.932	64.9355	126.862	19.52	19.9324	29.3509	20.6538	167.093	109.2	104.915	136.324	52.56
	15.2985	94.1333	31.0676	18.2055	50.3968	70.2982	165.046	118.747	42.4286	148.463	20.1975	23.2468	33.0933	9.43056	156.254	69.3816	96.962	103.656	50.5286
	19.8961	80.4667	27.9394	17.9565	58.7414	63.1392	88.7895	133.167	65.8333	79.2027	20.5676	22.4342	29.6667	18.3182	172.667	60.197	95.0933	145.301	61.4493
	39.0132	24.6491	21.75	17.5325	52.3194	62.5373	147.391	119.423	40.2923	149.405	20.7237	19.35	30.2787	23.0938	187.379	72.1184	86.6719	83.0822	56.9481
	40.0877	55.9231	19.507	21.678	21.9474	55.4937	165.759	119.85	20.7931	144.507	23.5571	13.2167	28.4658	17.6104	185.194	122.482	91.2951	40.5846	36.974
	26.0789	21.3611	42.4412	24.2933	49.3671	39.8261	164.319	122.897	51.1579	141.571	21.4286	19.8082	31.6563	25.1333	173.103	78.6	46.8451	139	38.2667
	24.5479	60.6	32.6053	17.1875	47.7273	43.6111	159.304	72.8235	53.1228	105.5	19.8714	22.806	32.1507	19.4091	161.645	129.017	93.4359	65.7632	48.141
	25.8108	69.7015	31.1067	17.7069	63.6901	50.0395	119.329	120.743	84.1967	137.356	16.8929	13.9583	29.8846	19.35	93.0862	92.6471	115.661	66.1111	76.7917
	28.4051	61.5763	36.6933	17.5763	38.8485	77.4769	154.797	139.797	57.5802	167.597	20.2576	23.8333	25.5938	20.0811	218.667	77.5263	72.4706	123.109	56.8451
	31.6957	58.2131	24.0694	15.6912	58.2535	60.5541	186.688	135.043	34.8214	164.797	23.9136	14.0769	33.141	18.4559	174.93	29.386	66.7222	154.527	57.7468
	50.4085	57.4861	28.4675	15.3382	57.0351	55.2857	181.852	106.885	111.688	130.015	19	17.2105	32.3521	22.1014	203.507	72.4032	79.1507	119.104	65.6923
	33.7949	83.9733	37.3165	15.2333	65.1216	60.72	146.176	83.7857	66.4691	146.957	17.7966	21.0513	30.2821	22.8875	165.015	69.8596	37.4035	87.6604	60.9359
	32.3733	86.7971	33.5443	24.2203	58.2179	60.8955	163.667	108.026	57.6567	143.987	19.5443	21.0556	30.3766	11.4079	183.785	98.25	92.3971	121.405	55.7143
	26.4865	39	29.8286	17.7703	41.9344	57.2319	89.375	132.179	132.925	78.9844	21.7857	13.8026	25.0694	16.1429	132.111	120.094	40.8354	124.291	59.8571
	38.2597	110.938	22.7792	21.3	65.0667	63.1154	150.185	143.629	68.6623	136.159	21.8448	24.4342	29.8525	16.4262	82.3038	120.705	104.029	139.912	53.5385
	39.2143	34.7733	33.0685	18.5217	89.2338	30.9634	166.024	63.5938	78.25	149.725	24.9848	20.5938	29.0746	22.7432	144.177	32.9041	93.3623	117.24	59.0658
	42.3544	56.5179	24.9615	19.5823	52.2206	64.5714	150.731	98.3448	133.377	135.065	21	16.1695	27.0303	21.5333	207.719	124.91	101.2	34.4054	55.4648
	36.1233	83.5467	22.9855	15.5584	77.0139	55.8103	86.5352	129.587	69.2206	75.2059	20.8136	26.7761	25.5797	23.7397	189.638	84.3667	88.7606	74.8442	47.6984
	36.3671	64.0506	33.4923	19.7568	58.4474	69.8226	115.692	127.873	62	104.714	20.3571	18.7179	29.4861	23.1667	163.072	80.2857	101.949	73.4658	39.6184
	30.5484	85.303	38.3291	19.3151	81.8276	52.1875	145.149	93.2295	67.5375	130.554	21.825	18.1077	25.4833	26.6582	155.321	120.071	42.6447	76.7533	114.843
	33.7414	73.4595	52	17.1392	80.803	69.1169	108.066	97.7564	29.4054	96.1316	16.9016	19.7895	30.0933	25.6429	159.596	109.276	121.846	154.864	35.3235
	32.5294	97.6623	46.1613	26.2987	62.519	66.3288	168.132	114.153	30.9655	155.635	20.3966	19.2703	35.0128	28.7975	134.139	87.1538	114.247	123.948	37.3158
	37.7302	71.0769	29.35	16.0132	42.1429	61.1765	129.066	87.7733	52.2338	115.513	16.6857	22.4386	33.8889	20.2241	151.036	116.984	23.5067	117.235	29.5538
	43.8644	76.9873	24.7561	14.7368	81.625	61.913	169.714	125.987	56.3036	153.545	22.4754	19.2941	26.8961	22.9231	170.679	67.4058	84.7534	111.171	109.764
	32.8378	33.7619	32.3333	22.5857	31.8025	64.5	148.317	132.809	60.8846	133.82	17.9474	17.0625	28.9324	26.025	177.016	78.1143	45.5263	128.647	40.0147
	40.2419	85.1746	33.4211	15.8235	68.3889	65.7619	176.672	101.381	88.863	160.763	21.0462	14.6579	25.7206	29.4697	59.0548	91.6429	38.3014	63.4844	84.6575
	48.4211	29.1525	30.4054	18.2647	61.7258	51.2174	155.877	86.5467	91.6364	138.214	21.7143	16.4921	25.4861	21.7222	140.543	94.359	121.207	21.9322	60.3729
	45.9286	60.9138	29.4684	19.6849	53.7167	62.1618	123.091	121.178	63.7288	109.333	19.8267	22.3538	30.5072	21.8406	155.493	89.7971	112.662	94.8286	80.7067
	32.4923	83.5	35.3333	20.377	52.3231	61.7143	128.975	114.384	68.2078	115.531	17.8592	21.3582	27.9412	20.0128	140.059	38.9649	100.583	65.3382	54.4643
	30.9254	84.5085	34.9683	16.3077	52.9831	43.7027	134.155	58.9508	45.5932	119.486	19.5072	15.8947	33.0448	27.5429	163.446	83.4931	88.4605	140.688	54.4915
	36.1833	84.4225	22.9474	21.25	54.7125	63.3429	145.342	97.1449	88.4306	130.923	24.2206	20.7692	27.5833	21.3621	177.188	74	142.286	139.229	66.1803
	46.1316	71	23.8947	18.2078	32.9412	70.6543	129.932	121.137	50.8	115.78	15.5135	23.6308	30.169	25.7368	158.95	66.5846	57.4828	154.139	57.2353
	31.8448	79.6462	23.1667	21.7761	63.6377	81.4242	145.761	100.912	31.9298	129.153	21.623	21.942	31.2059	27.8667	175.982	118.154	89.1515	81.8507	71.7778
	42.6154	82.9254	20.0714	20.0896	34.4177	73.8378	109.824	110.741	25.25	95.9342	25.6901	16.9464	27.0845	23.493	170.092	62.5574	67.8116	157.62	67.0429
	30.1406	53.9464	22.6364	17.5065	68.75	77.3718	139.703	79.1831	46.7763	154.905	16.2424	18.1029	35.0921	23.5775	184.306	81.2143	82.7037	125.59	96.9429
	30.825	17.6721	25.3662	14.6491	70.2055	81.069	172.908	83.2692	57.0145	124.926	19.9143	18.7541	31.4189	27.275	167.426	76.0282	84.84	93.6719	73.2923
	25.7949	88.9483	20.7143	19.4737	30.4375	58.65	141.595	120.964	72.1739	142.028	25.0877	18.6389	28.125	19.5417	195.536	114.041	66.9024	140.585	88.9107
	31.3571	69.8611	20.875	16.3684	50.8696	71.08	158.178	114.379	72.7013	107.1	16.2143	18.2258	30.3636	26.3833	159.045	100.969	90.8659	118.256	109.265
	34.625	75.3871	42.5172	20.0897	75.7619	65.6857	120.085	149.886	47.6765	129.29	19.5395	20.2063	25.2105	20.9067	172.646	117.792	39.3288	133.377	40.8261
	38.7746	59.1625	66.4648	23.1282	66.6182	76.9	145.222	108.932	46.475	84.9747	18.4203	23.3971	26.28	25.8831	163.228	104.125	102.295	131.568	38.1071
	32.7167	57.8485	48.7179	16.4444	58.9365	71.8481	95.6923	50.55	99.7639	60.3875	18.9643	20.8442	33.2658	27.7179	163.7	104.772	83.7857	30.5	45.7945
	37.0897	57.8289	25.4242	22.5696	48.2338	61.6133	68.2279	76.3733	69.0286	140.28	20.8529	16.8	28.65	24.5625	66.7385	25.1304	67.7215	34.8889	59.3538
	33.4127	88.3898	23.7407	21.2987	63.4462	64.6721	150.303	117.97	49.24	141.648	22.6232	14.2754	27.3621	23.3684	179.797	95.0152	47.2388	67.2597	65.12
	41.0649	73.9333	23.381	21.5063	62.3443	59.6087	154.562	134.597	34.9167	110.234	17.1286	14.0139	29.6552	30.9322	176.082	89.4493	96.2923	33.9178	56.863
	34.3462	76.2813	19.2836	16.7875	75.2338	55.225	124.184	126.603	53.2034	131.512	24.4516	21.1667	30.6923	18.0877	159.325	101.507	133.129	135.643	57.2405
	36.8308	100.622	31.1944	18.7564	33.6232	67.7391	147.538	132.644	67.2462	131.942	20.1923	21.3286	25.2424	26.4225	129.051	83.5067	136.88	130.58	60.918
	40.4868	95.3333	31.6176	17.1449	60.1324	57.9296	150.914	36.8667	53.3913	136.635	26.4426	22.3214	22.6849	31.9464	158.659	107.658	138.079	128.103	67.194
	32.6143	32.6393	38.2222	15.8421	52.0411	73.3	151.387	94.411	57.025	151.167	18.76	26.0256	26.0345	24	152.862	95.1356	66.1139	45.0882	59.4828
	51.6923	61.1184	30.4744	19.3939	59.2941	64.4918	167.15	72.4211	54.038	134.459	18.7531	16.5085	27.4754	27.2941	183.288	120.849	121.631	128.375	30.5753
	31.9231	83.8333	22.4933	20.8793	50.3548	55.5867	150.27	125.07	96.4167	140.691	21.8961	15.8571	25.0606	25.4545	143.772	91.5513	107.835	75.6579	67.1452
	36.9067	79.9692	25.5263	21.75	55.0676	49	156.676	142.655	114	111.652	24.2051	21.2754	29.2121	24.9831	127.61	100.426	89.1467	128.203	71.9577
	44.1549	103.74	28.4627	19.1081	53.9296	73.5286	124.435	60.1356	88.8235	116.347	17.1525	29.4	30.1528	23.3718	179.707	34.9516	70.4937	73.5	41.8485
	37.4146	68.4559	42.8026	17.2836	80.8889	71.8293	129.667	129.387	43.3906	152.676	19.8961	22.1944	34.0789	23.8281	132.261	83.7432	97.0317	155.82	41.9385
	42.1525	57.0789	27.1607	15.0633	30.7971	41.8644	169.886	109.78	49.6769	143.603	19.375	17.1	26.4706	26.6757	144.565	24.8644	113.781	30.0345	60.1273
	42.8873	67.8378	53.5676	20.4516	55.4545	53.4138	157.013	115.379	37.5753	138.13	29.8	21.45	25.831	28.4909	76.3906	75.7424	108.699	70.4737	73.7
	46.7377	31.0923	28.3544	14.9298	27.0175	69.95	150.28	115.397	59.0448	68.4068	22.0678	19.7183	28.8806	16.013	113.657	90.4429	96.8806	61.6711	59.8625
	25.9242	98.1875	22.8974	16.7077	77.5395	68.2571	74.8167	52.1667	54.15	149.108	24.5679	13.0147	26.2055	29.4103	147.338	95.7797	137.773	48.0909	93.3214
	35.2833	86.1667	21.4054	15.875	64.411	44.0656	166.391	84.9846	60.7143	127.792	27.0167	21.6986	36.7922	26.45	158.506	121.554	91.3636	69.8904	51.6167
	55.1846	30.0263	29.8525	20.6897	38.0127	52.0179	143.889	111.013	65.443	138.704	19.5342	17.381	26.3288	25.7875	153.274	90.2188	107.595	27.8833	45.8806
	53.1786	79.9385	26.0769	21.8167	56.6351	62.0656	153.519	110.867	125.279	152.524	23.1772	16.4789	24.8333	28.7632	188.783	99.7975	93.9143	54.8971	99.7742
	31.386	77.2679	23.5909	18.7123	48.8816	49.3288	168.951	102.238	47.3167	115.767	28.1096	17.1558	25.5846	32.6585	154.696	120.432	88.4928	46.8125	37.6757
	34.2714	87.5833	22.9487	19.92	31.7391	68.7042	130.883	106.449	111.113	136.449	24.3788	19.5571	33.1875	44.7536	133.615	72.8871	109.5	25.9697	97.6463
	28.6765	62.6	82.8082	21.4219	36.0308	61.931	153.405	127.276	54.7213	144.929	25.6143	16.0139	34.5921	22.0143	67.1639	111.915	60.6795	27.5	70.6962
	43.4079	68.169	35	18.2692	62.1013	65.2656	160.839	107.724	39.4098	57	22.2192	23.7778	32.6719	23.5128	138.561	41.7288	45.8052	78.5789	46.8064
	44.1169	65.0897	21.9219	18.2987	48.9324	62.2222	65.8	43.3478	49.9344	127.961	21.386	16.3662	26.1081	23.4286	179.625	71.6818	149.208	33	60.8861
	28.35	82.1936	27.375	17.137	26.4098	62.9315	144.145	101.375	88.5616	140.545	25.6212	22.7273	25.3067	23.7692	137.286	103.692	75.1304	31.9153	47.1692
	46.4051	104.621	20.6667	18.55	23.5	83.7879	157.533	101.203	67.3158	105.713	24.0667	18.5224	27.038	21.6786	141.269	33.9394	85.7013	61.8254	50.5614
	34.5	75.3729	71.8533	22.1316	64.2105	67.6027	119.65	109.734	73.75	100.338	22.3729	20.3	30.4844	26.5231	83.8615	94.076	67.0167	46.9032	37.8088
	38.8226	79.493	29.775	19.875	52.2821	63.3898	113.588	107.833	50.4605	150.655	26.1207	23.9306	30.5132	19.3766	179.949	76.24	111.906	26.8028	59.0135
	29.0893	60.1216	31.3143	23.2206	42.7879	77.6833	166.5	104.688	34.5303	89.4872	19.7826	17.9692	31.7662	27.622	80	78.4706	104.804	48.8553	43.069
	29.1212	55.8961	36.0833	17.1912	56.5147	61.2203	100.769	106.079	24.4923	155.471	19.4697	17.3387	29.3768	24.7424	82.3289	83.7297	109.522	29.2278	81.6267
	42.9275	56.3117	27.2537	17.0794	45.4	33.6098	171.309	100.649	62.3571	117.414	29.8727	19.1519	25	23.1642	137.263	124.7	64.7377	83.411	53.6176
	43.7778	70.0317	28.0676	20.5395	29.1864	52.1884	135.557	98.4	50.76	158.431	18.459	21.4857	29.8553	19.6271	177.15	93.8451	115.257	58.6957	46.3182
	51.5	95.8382	29.6379	16.5469	47.8875	74.8533	175.446	62.6364	98.8421	131.152	20.0893	17.0789	34.4407	24.3793	168.377	125.985	53.55	61.9565	77.6406
	48.6984	69.3438	24.4426	19.7568	32.4286	51.7467	147.051	89.3286	74	111.338	21.9722	15.125	28.9189	26.1692	186.409	68.913	93.6818	55.7564	83.3333
	44.5714	56.8676	42.0563	21.5634	13.2241	75.4091	125	110.892	79.7703	148.922	21.8205	22.75	25.7031	27.6	142.672	97.5714	101.324	25.9873	94.9079
	37.5072	23.4493	35.6184	17.7534	18.0135	73.6491	167.254	111.375	91.1795	137.855	22.746	22.3797	30.2462	24.5676	186.259	93.2	100.571	25.7692	81.0649
	25.0923	75.141	38.1667	20.8143	15.6071	72.8667	154.514	114.862	63.2875	51.2951	23.519	20.8	30.2346	28.9324	181.962	37.6	66.4084	77	37.4
	38.2167	26.3194	28.7538	17.1	11.9	95.7534	58.1311	119.567	95.5556	120.134	26.12	28.75	31.0862	20.3971	159.731	75.2875	95.1875	17.1455	55.7821
	48.4063	39.95	29.08	16.7229	12.2373	48.5172	138.246	111.06	63.974	91.4231	22.3906	21.9538	29.4821	23.5342	169.133	24.2468	59.5789	33.5507	73.3443
	40.7125	85.5147	26.7895	18.5082	15.8608	98.3038	102.7	130.938	106.183	113.549	29.6962	23	21.987	25.1034	198.234	81.7945	97.6102	84.0735	43.9412
	39.3889	82.7606	19.3836	16.0179	19.7534	71.8088	128.819	92.6104	58.7846	108.743	27.1233	21.0526	24.875	26.6528	150.59	43.8846	89.9041	78.7018	83.3803
	36.443	71.8286	27.962	19.1167	16.2537	79.9342	123.013	124.071	30.8947	145.493	22.8246	21.5692	25.1429	19	147.515	125.365	92.2679	119.237	75.2857
	38.1017	71.5263	20.961	20.4177	16.8246	59.3418	163.471	98.0175	108	131.45	18.5088	19.629	31.5139	25	164.592	87.6487	40.1053	62.129	66.5676
	46.425	81.1207	36.8814	18.2432	9.94737	106.753	147.625	108.533	61.6377	134.918	21.971	23.7215	27.5143	23.25	147.937	85.3544	132.455	64.4211	106.514
	46.1143	107.896	20.6667	17.2286	18.7612	54.0645	151.342	96.5658	67.4915	94.5441	19.7	22.1429	28.9324	20.0893	118.92	65.9583	82.3014	82.0933	47.0758
	43.8395	67.0702	53.2794	20.6102	14.569	50.25	107.059	119.449	63.8689	134.375	20.6724	19.7857	30.614	23.8767	132.926	67.439	117.026	34.0132	57.0875
	34.4167	68.1351	34.3929	15.1831	15.7838	65.1846	151.293	136.875	68.6301	45.9107	23.8101	19.0508	28.4658	23.3649	165.155	90.2459	140.576	60.8333	59.0541
	36.5385	65.75	36.2373	18.1014	25.1447	71.2188	51.8364	101.534	49.3485	117	20.1071	23.3462	29.0563	23.8382	176.949	129.972	92.3103	83.942	53.4459
	18.6774	81.1961	42.0167	15.8621	20.3235	72.589	131.462	115.836	49.6914	96.7857	22.8514	16.9853	31.2308	28.806	150.339	76.6721	74.4098	85.4928	51.8462
	53	116.587	24.7846	18.9333	22.4107	64.8971	110.029	124.294	54.875	93.7679	23.4487	18.3731	26.4138	25.9855	186.131	77.7833	102.408	81.4605	56.9718
	39.4507	51.9605	21.359	24.0833	21.8769	34.1846	105.69	112.683	74.55	127.037	20.7875	21.25	30.3288	24.6897	147.558	116.909	157.475	35.1842	56.0877
	48.7385	73.3281	20.1667	15.7692	20.3625	72.6329	142.813	115.696	70.0625	117.05	24.2414	18.8205	26.9286	22.0606	204.247	111.056	90.3288	36.1528	49.2222
	48.6271	50.0135	33.4203	16.1333	14.4756	72.7308	132.1	119.986	67.6232	164.303	24.5062	23.2632	32.6232	19.4833	150.6	88.2542	75.8108	70.025	83.3243
	41.939	67.6579	38.25	21.3875	11.9359	57.75	182.212	89.3333	113.03	141.138	24.8438	23.8987	29.6212	21.8101	174.731	84.6615	118.389	75.1351	48.3913
	36.7273	74.3175	38.1795	20.3167	22.4545	38.3182	130.828	110.479	45.913	120.929	30.2429	24.9828	30.8289	19.1642	70.5278	105.542	138.899	30.3284	69.1642
	39.1389	92.039	45.087	18.6866	27.4085	77.6571	158.108	101.721	43.3117	95.9429	21.987	19.2586	30.9254	21.9265	184.171	48.7532	95.4648	32.5676	53.8831
	37.2603	113.76	24.1	18.9143	32	39.9492	135.339	100.519	71.6667	149.986	20.6623	15.1385	35.1266	24.7167	185.859	76.5325	110.423	42.9265	50.1154
	34.9394	59.7917	28.3662	15.6962	17.2982	81.0429	109.289	131.31	61.5833	83.5417	21.7317	22.8611	28	12.9733	173.029	99.2692	110.912	39.8824	51.831
	46.6447	54.1167	31.6753	24.4	24.7342	58.9747	121.063	141.486	67.6885	103.776	25.6027	19.7414	24.1071	24.3898	142.788	76.4474	148.942	70.0984	51.4675
	36.5921	65.2297	45.1167	23.7179	17.1538	60.6711	168.757	116.196	62.678	117.852	25.0972	18.2073	31.8413	24.5333	162.395	88.5714	131.014	86.2879	100.033
	47.44	93.7368	28.85	25.1375	15.4156	55.5769	93.7297	139.736	87.7887	148.769	21.9167	17.6329	29.1071	25.973	150.183	84.6071	130.292	74.3667	50.1711
	41.2	67.0526	45.1343	21.3913	25.4143	70.2027	117.408	114.847	89.5714	45.9286	27.9744	21.1964	30.7971	29.75	126.987	93.2206	77.4328	28.4762	43.2131
	45.1231	75.4915	49.625	18.1392	14.7742	64.1646	130.574	103.694	62.8472	106.312	25.0759	17.9344	30.9464	28.5	196.147	84.2727	113.905	89.2361	94.4231
	42.5405	72.8548	72	22.1408	19.3115	85.3714	165.234	106.132	58.5641	58.5538	22.0641	15.7778	23.5357	24.0702	176.541	88.7	99.9672	60.96	84.4493
	59.1571	55.4386	72.6622	21.8947	18.7647	76.9649	51.3684	135.699	77.2615	143.732	22.3902	19.0333	31.8684	23.5167	177.645	94.6066	111.024	20.7667	39.806
	38.5352	60.7324	78.6029	22.8182	20.1667	67.6944	118.921	128.933	47.5758	139.411	18.3038	17.3867	29.8	21.5139	155.961	84.3214	100.342	42.6757	67.2338
	43.1159	79.4386	49.6071	19.2025	20.6897	74.2982	66.3538	99	39.3425	143.949	22.4107	24.6812	27.3167	21.3433	155.582	41.8036	104.87	79.5493	57.614
	67.4231	37.5231	32.4	23.6833	21.3239	79.9583	158.4	125.485	73.4667	133.551	22.6349	20.5775	28.3288	43.0571	156.785	90.6875	113.738	57.6479	50.2727
	44.7213	66.4625	32.125	17.1806	22.4844	61.72	155.911	106.872	37.1515	113.704	23.2769	22.2973	30.4211	20.0714	179.25	78.5844	159.948	94.6711	50.6712
	37.3944	65.971	39.0492	19.4237	28.3056	84.7941	160.169	111.717	86.5323	91.1358	24.6271	23.1667	28.7647	21.3443	205.217	111.25	81.6182	38.1026	53.1884
	44.0536	57.1061	56.9855	21.2838	13.5469	79.1803	149.377	105.613	101.662	98.6806	17.9286	19.1739	21.4714	23.7692	55.8615	114.594	69.6613	97.5	67.1618
	37.9583	48.5352	63.5946	19.2807	15.5714	76.0405	128.486	116.053	49.6087	151.612	20.806	16.0351	27.2	27.3788	117	65.2405	116.013	28.3188	82.1017
	29.4179	27.6447	32.88	22.5395	18.8143	62	103.438	90.8929	60.1781	117.411	24.3766	18.0625	30.0833	23.8056	157.014	71.5658	111.197	37.8947	87.0179
	47.8974	49.5658	43.1139	18.5921	22.4058	66.974	111.736	102.974	62.7647	133.236	21.087	18.5714	30.6571	19.7969	164.523	75.0429	135.279	39.6486	47.6216
	44.8846	72.2167	57.6842	20.1026	19.7206	38.5714	169.373	103.133	118.352	121.103	26.8036	24.3421	24.8356	25.0156	140.211	83.4583	128.478	72.4844	43.9333
	50.4179	69.3472	46.375	20.1167	20.0952	49.875	131.018	95.2	35.0147	95.4462	28.5294	19.7125	25.2703	20.4839	168.492	103.359	108.29	63.3833	56.8704
	43.4225	62.3968	56.1724	22.4407	22.0506	53.6351	150.562	86.5758	68.6429	71.4286	24.6579	19.8033	30.0139	27.1818	152.217	66.9231	105.172	61.7632	43.2817
	42.4407	65.8451	45.9744	23.0164	19.4821	70.5658	136.316	86.7333	48.3333	131.594	21.3125	24.569	30.8701	31.1507	180.658	87.2597	139.486	62	50.0909
	49.4737	68.2807	3.85	22.7385	19.5882	65.0896	107.985	124.065	57.1143	63.6806	22.6667	19.7458	19.9155	24.8841	78.6957	91.7895	83.2368	66.2273	39.7463
	45.8358	75.0423	32.2468	22.6102	19.7067	56.8026	80.3291	99.9138	65.4655	123.082	24.4177	16.4366	24.1642	24.6207	168.85	85.2394	135.819	85.5522	61.0441
	40.7042	26.7377	32.5946	22.8983	21.0633	56.9692	114.453	104.909	90.1408	133.212	19.2333	23.9103	28.8625	25.6812	131.625	98.1607	125.974	24.4	51.4557
	42.2179	25.9342	59.0882	16.4833	25.6522	78.2174	145.477	102.143	64.1899	174.527	22.5789	19.6552	28.1216	23.8548	201.055	87.6229	118.034	80.8919	78.9474
	34.1389	33.4308	50.8276	15.4286	21.0633	67.8382	71.9861	74.8421	41.0658	109.709	23.5077	18.4267	33.1795	28.0182	145.355	116.333	141.113	96.3421	56.5965
	35.623	64.8833	62.6833	24.6034	17.9483	67.987	137.575	97.1636	68.7333	124.506	20.5077	13.4531	27.6709	26.2833	156.667	105.386	152.607	59.6197	68.9359
	51.2297	71.6379	45.0769	19.7568	18.8194	70.08	148.746	138.557	96.8961	116.086	19.1563	18.3846	32.0877	27.1507	154.041	90.7867	132.947	95.3333	50.0152
	45.1053	65.1833	50.8276	19.0313	22.4615	67.5325	192.945	116.633	60.0385	130.862	28.3733	15.2727	32.1039	25.1389	167.706	91.7778	113.581	38.0145	32.0357
	25.942	27.8571	66.5	19.9333	16.1143	66	122.481	140.044	92.4677	131.3	20.5469	17.3699	24.5694	22.2985	194.563	66.1404	55.038	85.0405	57.3768
	51.8971	28.1507	65.5867	22.7164	18.0145	79.3333	139.709	94.9296	66.3056	54.0606	24.9605	21.4348	28.5714	23.0704	172.197	67.5263	113.224	54.9873	53.9851
	35.5128	36.1695	34.597	17.2532	21.8333	69.209	131.328	131.052	70.1791	145.643	16.7647	20.9467	26.0375	29.8929	67.275	87.25	146.329	43.6429	46.2903
	40.359	47.3611	47.7564	21.6447	17.2639	79.6456	144.924	110.703	34	92.0968	26.3038	17.3333	25.0469	19.6338	159.37	118.5	141.026	70.0267	46.4521
	47.9385	90.1475	40.6582	20.3898	23.5	78.5513	147.913	113.7	54.7705	79.5479	23.507	15.1017	27.025	26.7125	126.2	59.9	118.07	58.4462	76.3544
	30.05	67.3924	53.1148	23.8333	17.0145	62.7101	61.6618	100.517	56.2027	93.5645	21.3117	23.2754	25.6076	25.9565	163.3	62.3636	89.7231	34.7313	31.2031
	35.5897	61.9322	23.5513	24.5429	23.5507	59.0597	161.527	127.232	64.9063	95.0441	22.0789	18.1774	35.4286	28.4333	191.382	109.448	74.2632	82.6667	68.7792
	41.7975	58.0253	65.1096	20.7375	22.5128	68.8442	102.903	118.539	44.8056	147.083	24.0159	16.3544	26.1053	19.8621	168.373	81.4127	131.662	74.3	67.9492
	48.5132	32.5132	59.3562	23.5873	14.8621	75.5441	89.9315	126.333	66.4103	122.146	20.1379	25.0746	39.1096	21.7193	168.831	73.4933	50.7941	75.6866	29.3973
	28.0897	57.3333	54.1176	17.7051	15.7377	87.8929	104.54	96.6613	30.0746	126.379	24.8986	25.4026	29.8485	18.8983	164.213	82.2436	115.911	39.4459	67.8116
	44.1688	61.1757	49.8551	17.6053	25.9756	82.4359	107.582	94.6351	46.7123	89.4571	22.1607	19.0847	33.6835	25.9125	185.375	47.7975	142.885	68.1579	29.7568
	39.8667	75.5	29.0946	22.65	12.7015	94.8636	164.75	82.6441	60.2759	66.8205	24.4595	19.8765	31.557	23.7361	166.542	91.6377	104.25	82.0606	85.8056
	28.8354	59.8684	57.7733	17.2069	20.5342	75.7879	137.561	133.864	75.5072	140.838	18.4286	23.4789	30.2466	23.9487	194.064	60.7813	111.654	40.6727	49.9286
	35.0417	20.4643	61.6216	19.85	23.8158	58.3594	139.881	109.781	96.7586	104.464	29.2154	17.6438	25.8857	34.381	159.089	98.1746	139.982	56.338	29.8788
	37.2273	84.5733	52	19.0127	16.1571	69.5763	101.597	124.4	79.9571	114.645	27.4091	20.4	25.1392	17.9605	162.481	62.8971	101.09	25.2769	103.034
	39.3247	57.2273	51.4615	22.2623	23.6143	47.6761	75.7273	110.583	56.1918	165.357	20.8974	21.9818	31.4167	30.7671	147.183	90.1311	113.145	23.5375	91.4937
	40.9125	65.3571	41.1194	21.2727	17.2949	56.3158	156.5	90.1923	59.2857	119.373	19.6615	22.5526	23.027	23.1154	193.063	79.6607	135.719	53.2969	57.9359
	36.0658	36.2703	51.8806	18.2154	18.8406	63.5844	118.203	131.779	71.8667	148.266	23	26.2754	22.7179	21.9494	180.921	52.3143	127.857	120.119	49.2658
	38.8056	59.6912	54.7308	22.0769	35.4333	65.431	127.773	98.7941	62.5424	115.534	22.7895	21.1944	30.0149	27.8571	141.6	89.9014	86.3279	30.7692	41.4
	31.7714	111.167	71.7361	25.1449	21.9851	98.2051	178	96.5278	66.0588	143.589	18.9444	20.3973	32.1	24.9649	169.485	75	48.6429	91.7895	82.7432
	34.9833	79.2203	42	17.1846	13.7838	67.1818	133.313	130.06	73.9494	133.515	22.0411	23.6	20.8	27.4923	55.1471	106.453	77.8182	68.9153	102.805
	39.375	41.863	40.1594	22.1392	21.8103	77.0385	164.987	83.0508	77.7013	161.892	20.6833	20.5135	36.65	26.7018	159.667	87.4	38.9867	31.8571	27.7969
	37.9125	81.7612	34.3788	23.2429	16.8933	64.2838	130.552	114.586	60.9437	51.1974	25.2838	23.2857	30.481	23.9868	160.547	43.8831	94.6563	115.685	48.3939
	38.6076	26.4576	28.4464	22.2658	18.3562	54.9861	159.821	104.635	58.5167	70.7215	23.2692	16.1692	25.3731	23.225	173.143	62.6833	88.4079	86.4079	59.5915
	33.8421	86.72	60.2105	21.9844	23.4054	54.9848	149.5	117.513	90.6753	99.5385	22.3553	13.3857	34.8784	31.7922	160.321	64.5965	39.2192	67.9649	50.575
	38.1341	83.7632	61.3418	22.1268	13.7576	50.6769	178.36	105	74.1111	122.915	16.2969	15.5278	28.0282	24.8378	82.1207	84.1964	126.766	70.1029	84.141
	43.1519	34.7692	70.9722	21.3784	18.0986	29.1579	57.6623	132.658	38.1786	105.953	15.44	17.9706	27.3455	22.3418	146.106	73.775	39.8133	125.046	48.9836
	20.4571	53.7231	51.6833	17.3714	24.8133	60.4324	79.4487	97.52	65.8615	108.627	20.5526	17.9452	34.7733	19.5179	174.571	89.44	77.2857	70.9	88.2241
	44.5238	83.6377	40.2469	21.3896	16.8393	58.375	111.906	109.814	53.4304	122.817	18.3099	18.1029	30.3636	22.8082	179.475	81.75	87.1967	113.066	51.1897
	26.9583	56.1644	37.6714	16.6296	23.8904	63.5224	140.241	114.925	52.5375	127.343	21.069	17.375	29.9868	23.8382	164.232	72.4211	113.631	118.707	105.137
	34.5067	64.2564	41.2658	22.0875	13.3043	76.5625	118.197	95.1167	69.8875	132.901	21.4265	20.9875	25.2759	26.7463	176.91	91.1029	86.3692	75.65	73.7792
	29.8312	22.6133	52.8354	16.6897	20.1216	82.9429	84.6133	84.5676	70.4308	136.089	14.371	21.2267	29.0725	29.7231	171.3	91.0143	106.551	56.6957	70.678
	40.0959	62.141	37.6933	21.125	29.3077	63.0519	122.507	98.5526	84.5652	166.076	24.75	17.8246	37.4156	24.1754	125.273	100.737	79.3056	65.4407	116.208
	39.1587	128.275	98.9538	18.5068	17.1096	94.4464	142.293	128.317	88.1071	129.076	23.2647	22.9726	29.2222	28.5469	165.15	97.8889	31.2174	71.3103	70.3067
	30.5692	74.6774	60.6418	22.5088	18.3167	72.35	142.186	138.5	75.3553	139.064	25.4231	20.8077	28.7467	17.85	141.328	80.7887	100.361	59.5636	94.4
	51.5593	64.2353	54.3014	15.8846	17.6538	60.942	150.639	102.242	68.0333	172.29	18.7368	21.5224	22.9683	29.507	42.7541	67.0328	108.304	18.3288	108.987
	38.6538	66.3117	53.4138	22.5574	16.6933	69.2429	152.857	125.791	73.0779	147.147	18.7333	18.2055	26.1625	29.7368	177.433	114.171	78.1017	30.6842	105.959
	39.7143	83.3288	40.3684	19.6102	14.6071	61.3731	180.379	94.1286	54.2537	139.855	21.0137	13.619	29.1233	25.5238	154.645	100.136	109.449	77.7931	123.899
	37.8596	61.7681	34.2278	18.8625	23.6964	51.0417	146.493	99.6557	64.5256	115.082	22.0385	20.8125	24.6329	24.6	141.055	107.247	154.507	73.4615	105.506
	35.4474	81.8116	41.9265	17.85	14.2857	54.4576	154.613	114.278	81.8714	138.925	20.5	21.1884	20.6667	31.3875	122.051	111.703	120.3	83.125	104.468
	45.5541	66.8182	42.9242	23.9153	17.0893	35.6167	188.246	122.772	90.8919	71.9722	16.5652	18.6034	31.6538	16.459	159.463	84.1053	90.4189	47.5211	88.2941
	35.3906	76.2143	40.3165	16.5974	23.4643	64.2462	165.343	107.32	83.9306	135.913	17.2903	21.3472	33.863	28.3485	151.181	95.8333	107.742	68.9351	71.7143
	38.5316	75.7105	29.0357	23.1806	26.4923	60.8312	156.71	96.15	87.5	65.2836	20.5652	19.0385	27.5753	16.8718	130.768	81.6543	93.4079	80.3333	35.913
	49.75	50.3544	45.1818	19.038	20.2037	75.5616	130.317	121.697	31.6026	160.655	19.1154	12	26.0633	18.3846	155.081	72.9375	112.155	105.576	105.528
	43.971	68.3607	43.5132	17.1515	20.7719	46.2131	155.462	106.722	64.0263	141.93	23.1594	18.5132	22.6623	19.641	181.591	64.4167	128.933	108.373	33.1974
	43.1795	79.661	30.9872	23.4583	17.4727	52.9385	80.9452	90.137	45.4783	118.224	24.6986	21.8205	30.025	18.2763	132.683	87.9091	41.3625	72.5	47.5507
	38.4615	78.5375	34.1475	17.3158	18.403	40.4308	153.857	97.3816	74.2333	177.088	20.6267	23.3425	24.3333	32.4	176.623	83.4875	96.2206	31.3	40.7215
	40.4521	71.7273	25.0811	21	17.2195	47.8333	75.0145	121.892	46.4375	103.954	22.4493	15.6102	26.1299	16.32	65.6282	107.322	87.2154	52.8816	115.153
	39.8718	56.6154	25.082	20.7703	13.7467	32.4079	176.293	113.449	22.5256	168.552	29.0526	19.24	35.3467	25.0375	40.625	121.5	76.6667	23.4769	69.7342
	36.1358	123.559	34.6286	18.9481	23.0882	49.7692	157.241	112.061	20.8961	91.5362	24.7568	14.8596	33.2188	20.0938	174.143	110.19	102.657	133.792	54.12
	41.5735	88.6769	40.6333	17.3188	20	20.6974	132.961	113.051	61.7536	156.827	24.4286	20.4932	28.8	20.3553	145.595	140.628	102.203	57.0328	65.6528
	48.1803	54.1333	31.5584	16.8125	15.1266	57.5217	192.058	104.143	40.5	75.6769	19.0278	15.859	26.5167	16.3553	150.776	109.4	132.857	74.5	118.306
	31.1538	67.6316	34.4286	14.0909	17.8116	36	117.123	96.6545	68.9016	125.038	22.129	19.9831	26.519	21.2679	152.617	113.164	50.1081	84.8228	87.4912
	47.1053	28.4286	35.1579	19.2375	18.4533	46.7895	185.525	88.3077	55.6923	51.5484	22.4828	23.2727	30.6765	17.7833	151.149	96.5357	93.5362	66.9136	84.2329
	41.6375	68.3671	46.3929	18.2895	22.2	62.4375	104.118	124.763	47.0526	163.785	22.5658	21.9114	32.7975	22.3676	153.508	86.1639	111.75	56.4684	96.375
	47.1385	68.859	58.2419	16.4231	23.0253	54.6333	173.25	87.2982	60.6552	155.299	21.6812	12.5424	32.6133	22.1299	137.186	80.5538	125.012	129.824	87.7692
	37.7368	74.5526	29.8378	18.1558	16.5	54.9242	86.75	99.3846	87.8889	78.7206	24.027	18.5065	28.6563	22.6667	180.671	98.5733	82.2769	107.658	83.28
	40.9067	44.7857	37.4375	21.7625	22.1039	56.6486	140.988	124.162	44.6081	76.5636	23.7049	19.2679	23.169	24.2623	190.853	86.0933	114.859	70.5256	108.951
	36.5278	71	39.3684	20.5641	33.4068	66.0789	58.2903	113.526	57.4035	141.548	27.1139	24.1169	29.6849	22.642	41.7027	85.7419	87.4103	88.963	141.561
	39.8507	70.0278	19.9178	18.9589	17.9041	61.9167	181.188	78.3284	61.1316	132.697	24.5062	16.4	28.0588	13.4474	175.559	66.3077	102.613	79.3896	38.2535
	49.8333	107.377	48.3971	19.8438	17.3235	67.2206	171.014	97.3898	74.2917	136.159	27	24.2881	29.5875	17.7027	89.5574	110.822	117.532	71.5	87.8378
	43.5833	64.4026	33.5325	18.1111	22.1552	61.96	89.0725	120.263	64.1646	150.91	26.9365	18.125	28.4844	11.8816	124	111.637	92.6271	63.806	119.973
	39.9146	78.4265	49.5323	19.1139	11.2754	71.7971	86.9815	39.3562	73.8833	145.563	26.9079	26.5167	28.5082	16.7763	37.4583	88.2466	101.179	36.7333	97.52
	46.2692	70.1892	49.4789	23.0735	22.0571	28.5897	159	127.774	68.1311	163.177	20.4795	17.7015	23.1071	22.8182	43.625	74.3421	136.25	19.4868	54.2319
	39.6719	61.403	41.8451	23.1311	17.1148	61.038	149.424	135.882	55.8906	151.792	22.4359	15.0351	24.8205	21.1266	114.933	82.4386	91.6102	30.9437	108.149
	41.973	99.0597	46.5143	18.2281	19.7121	68.3538	153.212	109.203	113.3	159.545	25.7838	17.6438	23.4265	24.7206	150.43	89.8966	156.483	80.4675	101.937
	47.2909	70.8028	34.2535	28.1587	21.0847	29.8475	167.949	134.943	87.0857	183.901	22.6667	21.8701	21.1471	26.4286	164.56	109.485	85.4267	98.697	74.9125
	37.2027	41.8158	17.9853	34.3816	21.2113	71.6207	163.534	99.8375	135.532	163.862	22.1791	14.6216	25.2188	16.0984	30.871	107.671	124.787	33.1579	32.1127
	39.275	67.3544	31.1571	24.9048	22.2568	65.8594	179.103	133.975	123.135	125.397	21.8816	21.5789	24.9265	13.5443	159.88	100.143	93.1711	70.5395	71.4342
	45.0704	59.4912	21.1935	28.2763	23.026	67.2286	168.701	96.7681	107.127	166.324	21.8214	20.2533	29.8434	22.7619	150.423	132.318	98.9167	59.2241	36.7321
	49.3077	81.1026	38.0877	28.6094	16.7833	76.9286	177.244	119.372	81.5781	175.514	24.8831	16.0769	28.4304	18.6866	143.936	118.506	118.113	52.8714	73.0513
	37.9863	84.2319	27.5974	33.36	18.9857	35.569	199.397	114.513	70.7051	154.836	22.8986	21.3621	27.4872	23.806	197.333	100.738	97.7286	67.9677	92.2419
	32.6	67.2368	36.2597	29.013	20.9315	72.6667	180.431	153.719	57.8983	144.433	21.8846	18.0519	27.1127	19.069	106.518	171.027	78.5082	24.7941	124.768
	32.3448	88.5424	40.0175	27.2656	24.45	57.6479	140.068	100.193	44.9831	106.808	17.75	20.5844	27.2821	19.9324	66.4342	105.683	95.924	7.64706	121.824
	38.8077	60.3671	36.8718	24.7018	16.5313	82.0658	183.479	115.583	101.539	146.362	18.0139	20.4	33.1167	16.7705	71.6154	53.9605	114.103	99.3875	113.972
	40.6757	35.4	40.1818	23.7654	15.5	53	190.417	97.4583	124.371	127.338	22.1644	16.5625	28.5455	22.2466	135.211	89.8734	85.9167	73.7941	99.4857
	39.9123	107.218	32.8625	30.2373	19.3382	60.3165	171.863	108.141	44.0278	123.959	23.6377	20.3393	24.1549	15.6885	154.356	122.958	116.868	40.2143	75.924
	32.0769	69.4531	37.662	23.0933	15.4915	62.0556	159.638	109.522	107.692	166.794	20.0877	19.2338	25.3919	18.95	162.754	115.167	87.338	98.9403	143.25
	49.4308	65.48	52.7966	26.9714	18.5	60.6957	120.487	96.7794	83.3824	177.324	21.3662	15.2206	25.8228	25.0833	167.346	66.5294	89.975	73.2027	67.0145
	46.2785	77.7778	28.1923	26.2911	17.614	40.7213	164.159	105.44	118.28	132.464	25.1169	18.6234	28.2133	20.2692	114.988	71.973	100.3	61.0633	80.3846
	33.5278	69.9714	41.1304	21.3857	17.027	27.5147	143.282	74.225	123.75	148.237	22.9394	21.3	24.7679	20.2941	106.442	68.8	127.485	99.0267	89.2321
	33.4375	56.45	44.4557	23.35	20.2179	53.6418	138.908	129.304	53.0548	138.244	20.7532	18.7895	22.0179	16.7667	35.1944	98.575	150.973	76.0946	45.7231
	51.4265	72.4125	27.5246	27.6462	16.7632	50.1912	184.338	124.833	109.682	149.4	20.7042	18.9143	21.0685	17.4684	176.625	64.8375	169.408	69.6769	29.5902
	46.1831	86.0385	21.7179	31.9459	17.0294	70.069	193.487	124.793	101.921	137.25	23.6582	24.5949	27.4333	20.0267	118.831	93.9487	89.4625	76.3797	78.05
	43.6071	64.5625	28.84	26.4839	20.4265	69.8305	146.281	109.436	93.9079	173	20.1897	22.2361	29.3816	18.7564	117.275	83.7692	82.5672	77.8	94.3165
	57.7308	72.3333	48.9494	21.1061	18.1746	72.4156	165.013	127.338	49.5882	142.342	26.3553	17.7262	31.2857	16.4744	42.5513	78.0986	101.483	80.1184	42.7
	46.4242	105.875	39.9118	29.0933	18.0154	75.0513	132.429	108.215	74.5513	125.167	21.3167	16.4821	30.7222	16.5833	170.394	103.274	76.4211	24.9828	99.4933
	38.7164	91.8852	19.8519	26.8684	21.2941	28.875	152.506	94.7031	32.881	140.026	23.3485	15.5085	25.5797	25.5303	155.462	109.044	120.896	82.0267	105.237
	38.8475	39.88	32.4545	31.5	14.8333	70.0556	166.625	96.6667	54.1356	157.691	26.7237	16.4444	24.6753	20.9429	195.971	137.153	133.896	88.7031	157.895
	42.6438	69.3125	36.2857	27.2333	18.9103	54.9559	153.705	116.644	45.9474	171.757	18.7	21.1739	29.4051	23.3974	158.55	125.221	82.6582	72.9867	121.93
	43.831	47.3056	48.7544	34.9079	23.5541	31.4487	121.987	96.431	54.8182	149.933	20.6061	14.0714	29.0423	21.6579	172.747	126.069	104.197	85.0678	98.5916
	34.6615	49.3571	23.6667	20.6923	26.6667	72.614	190.194	107.589	38.7586	118.125	18.7288	20.24	26.6712	21.1923	170.969	99.2716	96.8841	61.2703	81.3733
	50.1944	74.2258	27.5932	20.4714	25.4872	55.6552	158.25	117.344	38.5345	156.875	23.6786	17.9375	26.2237	15.2581	137.293	106.895	95.0513	138.39	100.108
	46.1127	29.25	38.6615	26.0694	20.5397	46.6897	140.514	110.329	65.96	154.853	23.3924	19.4932	27.1139	22.9839	185.29	106.177	96.1733	42.8052	45.8961
	40.0615	73.4937	30.8765	27.8507	15.1795	68.9231	156.423	117.104	91.0328	144.13	20.8493	21.5921	28.7164	17.4085	188.689	121.971	110.913	60.803	150
	32.7353	41.2424	38.1538	26.7949	20.92	55.7419	173.294	99.3571	123.393	181.231	22.9853	16.8333	27.5676	21.7231	183.595	121.203	104.959	71.8571	98.2368
	50.8246	53.1167	22.3462	27.5893	24.375	84.7639	136.544	122.957	96.1148	128.025	24.6	17.5	24.9825	23.0333	150.103	135.943	140.182	62.931	142.763
	35.4507	67.473	49.7241	29.7077	16.0921	33.8406	188.071	99.0847	140.291	135.637	29.9125	20.5775	26.8784	22.8986	189.464	102.316	144.855	18.6711	31.05
	29.7568	57	44.7213	34.0597	18.3562	62.2625	167.7	105.15	113.589	121.889	24.5932	17.7636	33.0145	17	144.149	97.2639	118.924	112.273	41.3385
	28.0133	29.4189	40	24.5263	16.9643	56.4247	132.594	141.288	141.364	150.879	19.7667	22.4634	29.9577	17.8772	52.2931	126.158	57.9589	112.88	91.8064
	52.6207	52.875	24.8421	29	20.1389	70.0769	171.357	63.9714	133.171	171.908	23.5753	17.9636	26.1486	17.2679	150.921	119.662	137.797	78.6316	95.3158
	43.473	46.9221	25.2951	28.0847	20.7595	32.9324	172.213	66.1351	98.9125	152.895	27.6	24.4648	26.8286	22.0169	194.104	118.652	77.5147	144.935	82.6897
	33.3571	81.3108	29.9107	36.32	20.25	56.9028	159.575	127.2	105.225	144.613	18.1695	23.08	33.4478	21.8667	181.769	82.8987	74.2459	156.722	73.1842
	34.4328	61.0462	41.625	25.2388	15.8529	45.1884	197.449	109.081	108.807	145.638	22.1806	15.0606	25.678	11.791	166.881	131.367	111.475	132.257	45.7143
	42.5077	48.2394	38.5082	23.5082	17.9667	72.1765	143.937	111.567	109.042	134.709	16.6575	17.6795	22.5424	15.0132	178.779	100.101	100.091	81.4844	141.684
	28.7536	52.0435	33.0526	29.1667	22.4412	48.0159	151.152	108.611	99.8308	158.892	24.6364	20.7467	27.8375	19.3387	157.444	117.356	94.381	74.7273	90.9661
	34.9437	57.7797	22.1714	25.4568	19.6494	56.2105	139.887	104.098	27.8158	154.632	21.1912	18.4	25.7576	23.339	204.544	59.2692	47.8906	119.025	68.5789
	35.6282	51.6667	27.4211	21.1233	19.6625	54.7059	168.552	107.769	122.405	152.9	24.5	18.3636	21.971	25.9483	165.453	129.825	108.514	43.2647	68.0667
	55.8701	53.3026	34.9848	21.5915	15.2	73	191.532	121.984	98.8064	138.514	25.6308	25.2237	27.7042	19.2154	143.171	113.738	93.8974	96.1429	79.3
	33.3378	80.6753	38	26.6962	19.0435	51.8611	167.724	107.661	95.2133	150.757	24.0746	12.9492	28.3833	20.5556	144.125	124.263	108.367	77.4722	63.0333
	36.443	46.3289	21.425	27.6761	20.0405	44.1625	136.734	118.683	45.9474	114.75	25.8	15.4487	23.5065	26.0845	176.315	98.9818	122.269	83.6282	163.538
	30.5942	48.2154	24.459	26.2338	17.1842	46.5909	161.962	87.4118	70.9464	114.036	23.9342	18.0714	24.8226	26.8987	160.383	39.9861	103.092	124.052	161.357
	36.7	46.0588	27.2759	28.5769	21.5875	29.0811	160.203	92.0541	112.792	151.507	23.0253	21.6712	31.3676	20.9315	176.949	150.4	126.63	56.8036	122.932
	30.7759	40.0972	33.8235	30.5429	15.1818	54.2985	150.273	100.887	145.153	121.729	21.5769	18.7067	24.9844	15.623	191.241	132.594	102.182	59.076	162.316
	22.0862	36.141	37.3913	17.6812	14.6061	64.8571	177.726	87.9605	117.088	141.013	19.5195	19.8676	27.1125	21.9863	185	83.5085	127.253	99.9189	133.94
	41.026	20.4737	53.3235	30.8472	18.1538	37.1127	174.893	72.5325	120.091	150.912	14.9831	23.3934	26.7436	18.0921	200.481	125.167	111.817	68.3143	89.7922
	22.8214	49.1772	34.8143	25.7069	17.0159	35.7714	169.943	82.9841	133.053	75.0519	25.9492	22.3939	24.3175	19.2623	168.507	124.363	45	47.4098	147.661
	24.9375	56.9298	40.8772	21.339	13.8667	44.4267	155.806	79.9474	104.972	57.8889	20.8955	23.5063	23.2222	25.1169	131.559	117.934	84.6324	126.081	127.917
	14.3514	69.859	34.6842	21.4	21.5976	44.4487	167.176	125.759	81.3134	155.618	16.8615	20.9194	25.807	22.6308	157.397	100.622	151.8	85.9231	165.956
	17.0862	57.2895	18.0676	22.6795	18.1273	68.8906	130.194	147.765	99	74.2361	25.2712	17.1605	26.2329	16.92	40.3867	139.475	119.371	110.08	74.1972
	41.6203	49.4133	34.76	32.7018	16.3971	53.013	126.179	121.804	33.0185	62	21.6316	18.7867	25.0513	13.6757	43.7353	135.083	127.987	75.8442	79.3333
	31.6429	62.2237	50.7241	30.9524	17.025	63.8312	167.423	131.821	40.8611	163.186	21.5536	19.5469	28	18.6957	55.3056	95.0822	155.262	46	131.9
	20.5667	68.4366	45.9136	21.7576	17.9351	61.7286	136.62	133.362	98.9437	155.855	25.9259	13.2969	24.2222	26.4262	163.319	73.9595	136.259	107.508	132.707
	40.8788	55.9865	22.3378	24.791	18.5467	98.6667	160.987	114.873	90.7917	144.595	24.5823	18.7826	26.038	23.3385	100.509	115.455	122.136	93.2361	68.3036
	32.3846	47.3462	24.3026	24.322	14.9367	58.697	168.925	94.0141	98.7027	156.724	19.5652	16.6119	24.6875	17.2535	145.974	109.506	91.6438	94.3919	109.316
	20.0123	36.7143	35.7077	33.1739	16.1194	45.7719	85.0395	110.689	116.338	136.255	21.5128	15.0606	30.1831	20.4576	172.305	99.9178	131.742	79.7826	127.118
	20.3099	18.5156	30.3	21.0164	21.3448	43.6923	65.5323	101.409	80.25	62.8889	26.0845	20	28.8421	19.76	48.7059	85.84	89.7089	62.3797	136.69
	26.3167	65.4068	38.875	27.2714	20.5625	60.3194	169.771	101.41	110.726	136.145	22.4727	18.9867	31.7595	23.6333	49.5373	118.316	146.959	34.4359	135.686
	27.4426	22.8243	35.7818	39.027	14.0921	65.4483	84.4247	89.2564	97.1875	56.037	23.0345	20.0469	26.7143	21.0921	50.3971	83.6923	99.6667	91.7391	146.324
	20.8026	42.1053	39.6282	32.3871	18.6914	90.375	71.375	110.734	101.2	142.117	21.9114	15.2727	32.9605	17.2909	54.4068	52.8514	109.521	110.861	133.625
	26.3521	37.7531	32.5333	41.1695	20.5	64.3699	178.746	94.0986	73.1429	134.803	22.6923	17.4474	28.1719	18.5231	141.029	91.9444	100.936	32.2593	34.2727
	25.0366	62.6377	26.7595	20.8033	23.5915	87.2105	175.796	144.557	89.6719	131.324	22.541	17.1519	31.5195	17.5441	200.554	154.464	147.286	65.9565	143.561
	27.6087	57.0411	23.962	24.0125	16.2593	80.6447	159.453	113.371	103.871	125.766	24.7125	19.3824	29.1842	18.0152	59.8077	122.648	129.571	70.7971	66.6714
	34.1857	41.7183	22.3623	27.9211	21.7895	95.4444	172.864	115.438	101.522	123.141	21.2297	15.9487	23.4872	19.5224	171.957	73.0345	45.8305	101.554	87.4783
	26.8	44.7625	27.9118	20.6709	21.3333	70.726	153.263	138.781	44.7703	108.782	20	19.3194	28.3038	20.8947	186.561	46.3662	129.705	128.273	91.3438
	31.8133	48.0886	31.2078	26.4384	20.9138	73.1487	71.1233	115.973	88.8933	83.8125	24.0175	19.4861	25.4605	18.0125	196.949	119.613	112.548	156.515	83.7231
	24.8971	31.1772	37	23.3768	20.3611	74.2615	154.75	95.5156	94.4386	134.197	21.5195	19.9189	28.3485	22.5342	156.617	68.7018	121.068	57.4872	99.1795
	22.4146	60.4737	29.2167	25.1	20.4754	40.2297	63.2927	95.5738	93.8961	99.4921	20.8831	20.2951	29.5352	15.7183	185.528	94.56	141.722	88.3571	42.3684
	19.6286	38.3099	37.9079	17.2564	20.1563	77.4583	157.367	118.556	110.424	129.485	23.8553	17.7059	22.2763	17.5593	184.772	78.4688	98.9464	128.295	92.4684
	22.5538	55.6897	42.5091	26.75	16.2911	91.411	148.852	94.6962	64.5536	85.6389	23.2623	22.1644	32.1765	18.8267	203.3	99.8904	113.328	35.0685	34.2857
	29.1875	56.527	36.0811	26.2	19.9367	81.209	144.493	91.3731	49.3286	125.259	19.2436	20.5	22.4098	18.7941	63.7681	93.2714	128.2	67.7015	105.708
	30.4103	56.403	47.7286	28.9342	18.6667	79.5	135.09	77.6875	114.59	160.938	22.1429	22.1429	29.2787	16.6429	190.085	110.867	158.672	57.3971	90.4478
	26.5942	46.8889	44.6441	26.72	18.9744	113.304	139.359	115.613	79.8026	149.522	23.95	18.2297	25.3	15.3818	172.554	113.085	107.712	31.3	87.44
	21.9452	50.0455	35.6479	22.7576	22.4571	62.1233	123.39	88.375	73.4182	109.923	23.55	15.65	26.9221	25.9506	224.9	102.793	145.797	139.208	80.4286
	28.4265	42.0172	31.5694	27.0897	17.4348	65.8056	94.2593	87.4744	109.641	95.3784	22.05	18	21.2436	20.8529	174.753	102.123	137.515	131.513	75.1719
	38.625	84.2121	20.913	30.7571	15.3919	76.88	149.368	114.338	97.3733	137.965	21.0462	16.8529	28.7069	15.0882	162.4	99.9744	113.644	92.5441	59.1711
	24.481	80.8875	15.7538	23.0597	17.5	77.1316	113.113	45.5625	76.9322	64.1791	19.8814	18.8	23.6786	18.5781	164.577	99.2597	57.3971	102.646	73.9103
	19.7808	72.8923	23.8136	20.4364	17.4853	43.4667	145.779	100.487	109.029	108.75	22.8108	16.2167	29.2188	22.5938	210.461	96.4407	122.571	113.328	60.5152
	26.0658	63	19.9831	22.5357	18.1667	75.7778	96.8611	99.5362	110.711	114.845	19.0154	21.6716	28.4348	14.1803	185.35	104.55	42.371	114.101	102.725
	26.8553	27.5976	25.2368	27.5077	24.9429	91.8933	139.241	97.3944	102.582	134.688	21.859	17.3867	25.8281	19.0676	148	125.829	87	63.9114	44.9
	21.12	45.4211	15.7632	24.7342	14.6613	70.0633	177.679	101.048	87.0145	100.246	25.8413	11.9221	25.5789	18.0339	61.8933	119.983	88.0429	85.4342	153.949
	28.3158	21.9667	15.8831	35.6769	16.5593	60.197	161.944	100.276	116.366	89.2424	19.0536	20.7091	31.6786	19.5067	91.6833	104.953	127.629	135.235	151.119
	27.5873	25.859	22.2133	18.3924	19.9315	77.2879	124.462	84.5	37.0986	126.909	26.6667	19.3077	23.7778	23.4384	177.584	155.076	129.882	85.8571	107.862
	29.0308	39.8701	20.3	18.2029	21.2615	77.6866	88.2105	121.017	112.471	104.595	19.8158	18.8395	27.0658	17.0571	166.592	125.426	117.72	97.0328	80.8481
	18.0506	30.9844	15.7333	22.4103	18.9	80.2239	108	101.656	65.0909	173.354	17.9014	19.8289	25.5616	18.7077	198.362	92.3692	82.2987	73.2083	154.567
	30.3333	42.9605	16.5167	28.9474	16	66.6709	156.207	115.077	105.613	147.395	27.7869	23.9821	24.8243	20.15	211.892	92.9836	79.0781	42	139.195
	19.7656	55.3939	18.25	33.3662	21.25	93.6875	72.7463	115	82.0154	149.062	22.3729	17.8667	28.3333	17.3385	162.143	99.924	109.747	51.4857	63.1579
	25.4444	38.2899	18.95	28.8429	20.2857	66.4407	122.8	106.4	42.8571	84.2615	21.3797	18.194	28.1127	19.65	164.694	135.314	101.353	88.3913	97.2875
	29.6901	40.75	18.0897	38.9655	18.9825	78.0132	130.316	114.844	99.9344	175.882	21.8378	18.1739	28.25	21.2899	92.6957	82.4697	123.205	85.2911	148.64
	21	64.2432	21.6456	19.4098	17.4167	56.6769	151.175	74.082	100.167	111.4	22.025	13.931	27.2623	13.8387	196.017	102.5	138.532	89.7826	74.4464
	23.4375	46.1625	17.1842	24.3538	18.1974	67.0423	113.443	94.1408	45.339	149.446	18.9848	19.4684	24.3553	21.7333	136	132.852	58.7414	43.7976	82.8305
	19.8194	58.9265	13.9667	21.8732	16	51.075	100.803	70.4225	60.0735	136.232	20.4035	17.1385	23.1053	17.5517	199.667	63.8734	165.411	91.087	139.761
	27.3846	53.6563	17.1026	30.625	18.2	77.0385	140.104	129.843	69.2	115.985	22.9351	19.1184	28.65	16.5075	173.857	106.912	128.493	78.2055	100.449
	25.7826	25.3289	21.4024	29.8806	20.7612	76.6923	119	70.8254	64.869	120.328	24.5143	20.375	30.8065	16.2429	193.195	109.049	110.565	102.627	66.7273
	21.2237	63.8873	10.6607	26.5775	33.716	62.8	188.675	87.3235	107.873	100.059	20.589	16.5625	34.3607	13.8209	144.295	128.014	38.1333	31.1818	114.565
	23.3425	69.6615	15.5231	20.6462	29.9167	80.7887	163.704	120.375	118.863	55.971	20.5972	19.3973	28.2667	20.5294	148.176	128.051	76.3333	94.2237	131.986
	23.9375	35.125	15.5082	22.5857	33.2353	36.5893	165.833	102.872	79.1724	162.457	23.2027	19.6301	24.6753	17.2632	160.318	102.203	152.96	100.414	138.914
	20.4754	63.5345	17.4231	26.9322	31.4286	79.6364	95.3016	88.25	94.7949	155.787	21.4444	17.2388	26.9	20.4133	170.652	78.2564	100.986	69.8636	119.231
	23.9706	75.0769	17.3684	35.3514	37.377	70.4462	188.926	80.6393	97.5676	106.792	25.0526	21.5385	33.625	16.8667	122.802	76.9286	125.481	118	83.75
	26.7857	21.6857	14.875	29.7536	31.3115	35.1936	126.063	95.4	93.0253	165.574	25.9828	17.2281	29.8485	18.4348	163.91	98.1029	141.795	87.4861	93.4225
	24.2703	26.3291	17.3636	38.1184	25.3333	72.4125	165.769	117.976	43.1053	185.835	24.5342	19.7662	24.0519	18.4286	209.254	110.684	147.814	98.6269	103.096
	20.6	4.05128	15.1299	20.3239	41.3485	50.4386	151.491	116.275	39.6825	174.257	23.0135	10.9722	30.0494	18.3077	191.829	85.746	124.563	111.473	82.125
	20.1333	28.88	16.3158	23.2542	27.0128	81.1892	131.045	76.7875	25.9143	168.322	18.0263	16.3521	26.3797	14.7733	150.337	111.253	129.5	111.964	71.9322
	20.6714	32.4231	20.4688	21.9583	32.5652	57.8966	138.069	84.625	30.4691	169.671	7.32203	15.9821	26.3871	13.5488	153.203	107.843	137.058	89.1449	44.7101
	27.5775	26.3443	18.971	29.6471	22.9605	64.0811	111.217	108.509	88.3621	146.113	17.5862	15.2295	33.6933	17.3289	56.7051	126.179	155.532	92.7222	100.662
	18.9385	31.5938	18.5753	29.7778	18.3247	66.6923	64.3099	106.95	84.6724	176.193	28.9123	21.9846	29.7162	19.7206	177.805	104.434	38.3947	66.0847	45.0694
	28.3478	31.7742	16.9857	27.2375	26.8167	57.7164	179.478	95.6324	97.2542	135.72	22.6119	15.7308	23.7792	21.4085	176.071	91.2941	101.839	67.25	40.4487
	27.0395	37.4828	24.1857	25.6029	27.6812	77.0667	120.639	89.0735	131.325	123.328	20.2813	14.75	27.6061	13.375	103.452	95.2308	96.7403	58.9855	36.8772
	23.3088	33.3571	14.8158	26.8375	31.0833	68.275	181.603	109.957	68.2623	149.603	29.6184	19.1842	26.4714	19.1186	176.3	97.7705	42.88	105.808	130.013
	22.9	35.4706	16.0333	17.5385	28.0714	79.322	190.718	87.625	83.6184	157.318	16.05	18.3733	22.9138	21.5443	187.864	88.5417	49.5342	100.314	111.775
	23.7368	20.5	17.4444	16.7857	29.6962	55.9677	180.932	99.6711	90.7321	144.043	28.5789	17.2692	37.0385	19	80.2537	41.0172	65.7429	100.317	44.1299
	33.5323	33.0877	15.7308	24.2623	22.4839	66.5797	185.246	84.7778	40.1013	78.1091	29.0375	15.7391	23.4795	15.507	150.04	79.0984	42.95	65.6986	132.077
	23.8451	33.8312	20.1077	30.1311	22.1429	38.5	205.139	131.711	66.7179	139.079	22.2712	15.6393	29.6184	18.7895	143.457	88.942	44.7797	54.9211	92.4625
	28.4386	38.7368	15.0256	23.6667	26.375	65.6338	161.393	77.0143	114.133	128.041	26.037	17.8052	25.2237	12.25	119.737	75.2368	50.5147	37.2973	68.3056
	30.9118	20.0536	24.6216	29.3036	24.9474	37.2286	193.203	81.7761	67.5625	109.103	19.9481	19.2373	30.8462	20.8971	210.128	93.25	101.828	53.3462	100.707
	24.9315	19.9583	14.0154	20.0508	19.9867	88.8356	151.8	121.973	88.5455	153.121	25.7534	16.1351	26.6282	16.6974	177.547	93.039	84.8676	64.5128	83.5513
	30.5325	25.5584	13	18.5132	17.1077	59.8919	140.618	107.447	73.6487	154.25	17.8833	13.931	27.7733	17.4459	174.919	89.225	100.205	35.9143	96.25
	21.4429	19.4795	16.5696	24.7143	28.5526	70	166.458	103.394	29.2286	118.2	18.9872	16.7778	26.7794	12.7403	141.329	81.2857	101.221	86.4098	60.3485
	20.5797	24.5667	11.8833	30.7083	28.5439	26.1467	173.879	115.066	27.9296	140.8	30.3889	21.0429	25.7541	18.5769	147.186	81.05	100.447	25.2647	78.3165
	17.0877	42.3378	18.1948	23.7656	28.3857	76.6933	129.509	94.4853	107.63	170.986	23.1486	14.8714	26.5897	17.6552	143.343	79.8571	46.918	26.3293	39.6
	26.4156	18.5467	18.5254	25.5753	29.6379	75.9744	159.843	128.492	127.368	138.09	27.1549	18.8	30.0274	18.6883	161.611	96.3676	40.2414	111.333	49.3509
	23.1935	26.5584	14.7536	21.7895	29.411	57.6833	91.2143	90.65	108.015	130.286	21.5833	17.4487	28.9028	19	192.649	86.8375	132.829	117.463	130.697
	26.7213	17.2658	20.3478	22.4194	27.8553	58.9412	157.047	99.5385	145.241	159.957	21.7361	13.7333	24.0649	17.6481	212.016	87.6269	114.536	120.031	122.816
	28.5	18.8103	19.4103	31.75	30.6571	54.8194	144.722	112.481	123.648	99.5439	22.807	17.7077	33.2923	17.7222	123.891	73.9138	126.297	120.169	116.896
	19.6543	41.9	13.7534	22.5797	22.8	29.3768	122.845	106.184	138.859	78.4231	23.1552	14.6066	24.4545	15.3457	178.118	84.5769	117.654	42.1034	107.658
	23.5	27.7403	20.7361	21.8814	30.5469	61.2078	169.534	86.16	89.1364	153.944	25.5278	17.8333	23.2179	20.6389	88.9155	114.705	97.95	36.9107	71.7625
	23.5195	38.4	20.2687	28.7571	26.8125	72.5065	168.558	48.0794	125.658	129.206	23.973	15.45	19.2609	16.7419	177.162	145.869	43.3231	81.7179	99.1519
	20.614	24.5897	15.8354	24.8846	30.2564	34.6806	132.846	77.45	144.951	150.4	21.6324	15.8	20.4342	18.6143	160.692	45.6842	106.831	94.0649	63.7794
	28.3125	30.3846	15.9701	35.5915	27.3803	78.5455	157.217	84.5217	94.6377	153.427	33.2982	12.56	23.8077	18.6557	93.3649	95.0469	147.132	48.4286	93.1842
	17.4478	44.4412	18.2	5.28986	24.3333	77.3226	119.556	84.1918	101.226	130.481	26.4857	20.1912	28.6494	17.0563	195.761	85.7612	116.485	110.563	106.645
	23.7875	22.6923	20.0541	24.6494	19.1	94.2985	188.685	90.9286	110.138	165.667	24.2609	16.3077	23.7586	14.0375	161.118	90.3226	45.8684	28.0333	107.667
	19.5	37.0526	15.5397	20.5484	24.15	81.3951	155.343	134.855	67.3115	121.724	27.7455	14.029	29.3924	16.6338	158.099	75.4179	110.537	118.413	35.4868
	22.0294	13.375	22.5821	18.4444	19.6125	108.59	145.857	132.571	115.667	57.8553	25.9241	20.0256	24.7051	20.9268	153.662	114.552	116.313	134.5	118.316
	20.9867	25.6027	27.75	22.3421	28.3281	68.5882	123.657	79.029	75.1918	154.632	29.3276	17.1077	27.7797	13.5	154.767	78.4125	106.97	95.4328	93.9688
	27.8	14	20.1333	21.7581	27.6533	70.3056	176.2	117.789	93.0625	112.671	28.3134	17.5769	24.625	12.3333	186	64.2121	132.913	79.0469	38.35
	25.7564	30.8553	18.625	19.1739	27.2576	92.125	145.524	116.203	44.2179	155.727	23.2877	15.807	24.8806	14.5441	170.255	38.1429	39.2308	134.09	91.2542
	22.1159	37.0313	17.1867	18.8571	23.5429	94.1579	111.965	82.8714	124.152	137.493	26.2537	17.4074	29.1017	16.7059	54.0411	29.5821	52.8	91.2329	95.3625
	27.7654	43.5932	17.2647	21.1644	29.2532	51.3704	88.7821	83.125	132.324	134.763	24.8025	14.4	28.6176	22.3108	133.683	87.6563	100.732	102.051	88.8857
	18.875	25.3205	10.623	24.2679	22.6364	77.9298	137.551	101.843	151.681	156.129	26	10.6667	29.9667	25.9605	89.7759	81.8462	137.123	72.831	49.0429
	22.4	40.9605	19.2754	23.625	21.7576	90.7821	170.946	129.178	103.586	116.321	24.4286	15.0429	27.6301	13.2121	150.092	38.4756	126.723	114.213	29.1818
	28.7069	29.806	14.8108	17.8734	25.275	75.7206	146.463	130.333	103.311	106.377	26.1867	20.7193	25.6133	13.5373	153.158	49.28	143.444	92.987	34.4304
	14.0645	26.7436	18.6	20.7049	24.7966	48.7164	166.938	85.2097	123.597	61.2133	25.3	17.6833	29.4167	19.5	69.8718	80.3974	118.317	117.064	102.506
	26.2537	30.1111	15.7671	20.0133	20.9589	31.6552	170.597	112.645	96.1493	135.054	21.6849	19.1948	28.5493	18.1948	186.062	103.841	104.517	21.9839	74.5584
	33.9103	23.0339	17.7333	19.6066	23.2254	86.8312	183.803	78.254	120.409	170.779	29.2025	9.91667	35.6964	16.125	167.614	117.461	165.671	23.4	113.662
	24.1918	16.2982	11.069	21.6429	25.1525	51.0893	137.066	87.6533	103.139	133.145	32.3729	19.4776	27.1972	17.1266	139.564	75.6974	89.3559	94.4677	121
	23.4462	33.2432	19.4533	24	20.4545	70.0563	65.8571	92.1587	101.672	157	26.7949	18.7692	31.1429	19.8481	156.629	99.9143	127.183	80.1447	110.583
	29.975	24.6552	16.7639	29.5938	21.1475	67.0506	171.696	101.543	105.367	171.288	21.6912	23.5224	31.6944	18.6301	175.774	137.881	47.3108	73.9375	112.734
	23	17.9483	14.619	19.5588	20.5333	92.4189	127.08	148.429	114.205	146.584	23.7867	18.8382	25.4583	16.359	187.182	40.8676	41.2167	100.655	81.4853
	25.4521	36.8553	21.3472	19.5584	26.35	68.4	171.684	58.0758	130	142.383	27.4464	20.8667	29.3553	14.8571	173.709	94.3906	165.875	78.8923	139.258
	27.3103	17.6667	17.7286	18.859	24.3134	72.3418	154.03	135.684	124.679	127.442	21.8806	17.2373	24.6866	18.625	182.25	121.818	132.779	52.7639	103.986
	24.4828	38.2778	18.8194	24.6761	23.8857	76.6	152.187	40.493	113.853	141.702	24.8667	17.6974	21.9385	16.6829	186.232	114.06	117.595	124.847	116.885
	20.2373	30.0286	14.8246	20.8393	21.9296	88.2131	172.944	83.4459	114.443	161.576	22.6176	17.9437	31.5217	14.3875	162.177	109.322	113.563	69.9846	65.0789
	22.9615	17.8615	14.5152	21.4658	22.9855	76.7083	130.099	151.293	127.583	121.768	18.7397	16.1029	19.0317	13.9143	156.896	40.7288	134.782	34.8228	110.353
	15.5714	23.5303	17.7333	22.7	23.5	96.5658	118.74	161.169	118.305	122.033	27.7353	21.8182	27.1447	15.527	147.711	102.603	101.053	66.7857	73.75
	25.038	13.9855	23.7544	22.6066	26.9273	99.0182	69.5316	145.347	104.824	157.929	22.1935	16.1549	23.5441	13.8354	173.743	110.456	143.317	55.3836	124.378
	20.3766	23.4516	19.7833	21.791	19.4242	63.0303	151.214	99.3205	119.676	122.165	25.5833	15.2687	26.1842	15.1486	167.983	66.3415	98.1733	111.758	25.6667
	21.9667	22.1846	24.8875	23.0897	29.127	76.4844	186.794	104.507	94.726	127.817	19.1507	24.193	26.3913	15.9848	72.3286	147.414	105.768	145	97.8947
	18.7742	21.7647	12.3506	17.9041	20.2179	27.4545	152.746	109.902	88.8734	130.086	23.3067	15.9846	24.3636	14.6	59.9683	148.458	126.61	104.822	50.3478
	23.2162	26.6154	18.4107	21.3947	22.3088	99.1719	174.203	123.961	105.475	143.676	17.1061	19.24	27.1852	15.3125	203.765	24.2368	92.2279	107.746	140.107
	19	28.6119	25.6753	20.6712	21.1013	75.1167	187.984	94.6102	62.2203	115.566	27.9265	19.1053	25.3824	21.7	101.897	67.7692	119.339	45.7895	84.3974
	21.7679	18.8684	18	18.2647	20.6875	71.1127	162.641	112.189	125.563	128.615	24.463	15.5067	26.9492	20.9873	155.538	82.2615	154.716	101.108	90.8154
	22.5238	27.88	20.3766	22.3951	22.2333	100.622	160.607	51.8493	151.576	137.608	26.1324	18.7532	29.9825	15.4478	62.0649	63.9275	113.11	109.288	88.6857
	17.9649	32.9103	19.5373	22.1754	23.7632	63.3284	143.494	83.7125	119.351	127.432	22.9714	16.8519	26.6833	14.6875	145.873	44.8667	189.937	51.8923	91.6207
	26.6579	36.7089	21.5867	18.9333	26.8548	61.1067	156.912	123.104	146.836	116.931	23.8125	11.3924	24.8592	17.5263	150.109	74.7931	137.933	47.4231	73.3165
	20.9828	35.1846	13.3167	20.5556	20.1071	84.3521	180.561	102.58	148.783	26.9333	20.9	19.3239	24.8356	17.9474	82.1923	86.7049	108.1	81.6389	114.419
	22.8571	37.8182	21.2338	20.0588	18.9394	69.5522	137.739	102.181	105.804	60.1406	22.075	19.25	23.1974	14.7821	200.629	65.8734	140.056	135.986	102.574
	19.8772	42.2436	16.0704	20.5938	18.7051	110.526	137.683	97.2064	113.053	62.6552	23.8472	17.2031	25.6711	18.5584	229.456	80.1364	103.564	113.108	75.4384
	24.6825	19.4474	21.5152	22.7273	25.3788	106.949	174.514	104.613	93	61.9872	23.2281	18.5844	24.8846	16.1392	190.985	95.4	125.81	34.8214	41.5921
	25.3649	16.3165	21.1471	23.4828	17.6027	79.7018	134.407	112.222	115.051	29.0145	27.7966	16.35	20.8816	18.0145	142.875	69.4828	122.013	128.879	130.975
	20.5455	31.2059	19.2787	18.597	21.6833	61.0606	137.861	105.704	145.677	55.8529	20	20.3636	22.5167	15.24	146.147	62.662	124.632	61.9848	97.4366
	25.3857	42.1194	20.2208	21.8182	28.1711	56.1833	143.119	115.492	108.85	41.6774	26.8983	17.1884	24.3333	18.1644	200.281	58.8028	131.321	126.938	87.0921
	23.0488	40.6667	20.2025	23.7679	32.5333	74.493	145.944	85.7747	84.8333	30.1429	24.5085	12.4795	21.7636	13.65	142.329	100.914	177.618	69.4933	113.123
	20.3049	33.0263	23.2267	21.3043	34.4625	90.5714	159.779	149.667	94.9242	36.2353	27.5224	14.9452	24.9867	21.4079	167.418	64.6	138.879	69.5	128.754
	27.0128	37.8136	29.7879	21.0441	43.8462	88.129	130.184	84.7377	92.5625	39.0303	31.2237	12.9138	24.5714	16.1644	143.344	84.6567	146.776	131.346	55.2609
	18.4915	18.7639	20.1667	24.9028	42.5526	90.7432	145.2	112.113	97.5443	49.3514	23.9091	16.7647	25.4727	15.3582	152.632	34.8571	150	64.6964	112.708
	16.9688	16.8154	15.6842	19.2763	44.8947	92.8358	154.649	131.018	124.895	58.8	23.5455	17.7654	24.7308	17.8714	186.239	41.2895	68.2714	120.049	134.77
	23.3284	23.8333	15.7162	19.6329	29.8571	106.4	143.738	91.5077	104.354	37.027	29.2254	14.8354	25.2099	18.1026	162.446	73.4937	44.7215	117.935	38.8026
	24.0615	11.4684	18.2468	17.913	41.2909	55.4189	131.557	166.945	127.746	61.8438	21.5	19.589	21.9265	18.0395	134.297	76.25	47.5797	63.825	110.387
	23.6806	23.6216	16.7627	19.6667	26.1125	96.7465	31.5	108.59	94.3919	52.9538	25.5205	18.0952	24.6724	22.5417	155.539	87.8272	124.339	128.462	39.6618
	22.1833	13.8333	19.8649	20.8974	31.8438	70.4868	69.3871	140.2	97.5455	30.6892	23.7869	16.9655	20.7333	13.5079	195.052	92.5867	123.936	110.316	37.0154
	13.9863	21.5156	22.2899	25.8649	26.6765	79.08	71.2456	109.5	123.409	58.7571	26.4359	23.0896	23.7848	14.7625	145.211	105.988	105.293	47.431	36.2241
	17.5692	19.4932	18.7973	20.5806	39.1625	28.9649	70.1538	116.44	167.241	37.2895	22.1974	28.2836	27.0921	15.1034	177.462	82.9	81.9878	118.919	121.741
	30.1884	21.8033	22.8235	21.4667	32.8378	85.2769	32.9565	87.1125	140.903	38.2083	24.1899	22.1447	24.3816	15.9143	158.805	53.6076	109.816	106.895	109.494
	13.7049	11.4697	21.058	19.0536	31.1594	77.8919	63.25	90.3182	119.632	67.8481	28.0984	27.5	23.9211	21.6167	186.831	57.2985	105.183	160.655	34.069
	19.8571	18.4054	23.775	21.0278	20.7059	69.0633	47.2459	74.1154	129.319	129.988	28.9265	23.209	21.2258	18.2188	165.711	67.8889	123.705	144.052	75.3421
	18.619	17.9577	18.6349	20.1447	35.386	87.7747	34.2237	94.0923	46.0588	103.288	20.2241	25.3846	26.5493	25.9296	181.057	75.9041	42.303	51.8974	81.8793
	18.1343	14.4603	20.5641	18.5152	36.6923	47.625	40.5424	82.5467	117.925	70.1268	25.1096	23.1129	26.2192	13.8028	114.783	94.7931	136.744	83.6769	84.8052
	13.3793	23.3924	21.403	22.0897	41.0667	60.3924	44.2273	138.846	127.412	77.6066	17.2985	18.8088	24.6094	24.95	165.667	88.5789	40.3	81.8889	103.545
	20.5385	14.4	26.3088	18.039	34.3562	45.7463	40.8571	103.509	88.4375	129.13	28.2237	22.6316	22.1231	28.0779	127.707	58.9123	98.4561	55.4912	125.656
	22.0641	22.1452	23.1918	22.5	42.4118	42.1757	55.4933	105.703	96.7586	118.125	20.5921	23.8103	24.2338	16.6818	180.058	78.3692	80.8873	143.24	84.5821
	46.209	25.1875	19.5068	18.9041	41.6154	74.9114	66.5867	65.32	91.359	57.0423	19.8772	23.8636	24.3214	16.8571	157.646	88.5667	98.4091	96.4737	92.5443
	27.0253	16.1311	20.8077	16.2029	36.4915	60.2192	41.6027	55.6111	96.8718	46.6724	22.6	17.55	21.371	19.75	131.416	82.7051	108.051	106.468	47.0492
	27.0571	11.9437	20.4348	20.2623	31.0984	75.8689	70.0469	162.22	46.8636	79.0128	27.8333	19.3214	24.8806	17.3125	141.61	85.6825	93.4507	130.868	89.8158
	51.8261	21	26.1207	20.3291	24.2078	105.013	59.4615	113.027	102.688	115.406	25.5789	24.3333	27	13.493	155.629	49.1607	112.333	88.7077	30.5333
	46.962	14.974	18.3433	21.7241	28.9063	65.8235	35.3108	113.123	102.299	99.8246	21.6857	24.4583	23.1558	21.026	192.75	74.4118	106.421	127.538	32.5758
	63.8438	19.8154	18.8235	23.3239	39.5625	82.6167	66.5286	103.475	98.4691	106.582	19.9104	24.8861	26.1216	18.1833	152.23	93.2143	50.4328	91.6623	35.623
	26.4058	27.2881	19.7805	22.2222	30.3158	75.0625	42.2895	139.827	77.9028	52.6301	25.0328	30.3913	28.3671	30.36	175.177	74.1143	134.161	88.8429	84.0779
	40.6308	24.8	22.4789	17.3214	20.325	56.3194	42.9589	124.137	110.625	74.859	21.726	24.4359	24.8833	20.7671	172.456	74.8947	136.8	69.6944	54.7903
	35.5758	19.8525	21.1	21.1449	30.6974	113.217	76.7215	94.6111	136.646	41.1111	21.1324	32.0357	29.6753	15.9153	206.053	89.2838	71.9028	124.2	103.813
	33.7273	26.5625	14.4675	23.3188	32.0395	82.1944	148.141	105.231	47.4133	102.685	20.6795	25.6329	20.6418	20.6329	164.461	32.6563	93.6333	93.2143	50.9315
	45.2933	17.5976	29.5333	20.3117	27.5263	46.7403	116.898	114.365	112.513	108.377	27.9194	21.4321	23.7627	25.0811	162.914	34.2281	119	119.532	79.8154
	51.5167	19.6	20.4384	19.8333	28.8088	79.9867	79.338	117.844	118.887	105.208	24.6	24.0615	26.3205	23.3731	168.661	38.25	126.962	98.1594	49.0676
	49.5	18.7536	38.1644	20.6027	43.5395	51.4545	87.7705	97.2466	121.141	68.3636	24.1389	22.9219	31.7586	21.1525	140.1	72.0656	66.7	56.4595	79.137
	32.7639	22.5345	31.4429	22.2295	38.082	42.1324	111.458	71.8769	106.671	91.6308	25.6286	21.6857	22.4783	19.3623	151.649	97.1667	125.679	125.75	94.0667
	32.0588	21.274	33.2162	17.9114	31.3165	64.2687	146.101	65.775	114.526	76.3281	25.7105	24.1622	18.1552	11.5593	157.172	90.8116	75.3692	99.6528	73.7083
	39.3167	17.6034	27.3793	20.8442	32.6212	60.4783	131.603	122.827	103.985	56.5125	23.3067	22.1948	25.338	27.0909	184.87	71.0548	33.6962	130.149	87.0597
	54.4737	12.3529	32.48	19.7945	32.5303	76.7692	64.5634	95.7759	98.7246	115.463	22.7833	26.3538	20.7895	16.5909	147.195	110.211	117.237	47.5455	78.9123
	39.9833	9.18644	22.359	15.5538	31.5738	71.058	103.393	117.412	112.544	40.7805	25.2133	18.2857	26.1316	21.9487	197.053	92.875	114.643	56.4	69.1299
	39.5325	9.46667	35.9385	20.5789	35.7308	91.4935	52.8276	117.758	100.833	101.955	17.2821	19.6471	24.6	21	153.685	66.1974	103.609	133.446	91.7458
	41.2692	13.9577	19.1842	23.4821	25.5333	70.2581	90.55	100.042	89.1857	82.45	20.9206	22.8214	26.1148	16.5167	164.143	106.74	109.439	156.164	95.4342
	54.4412	24.8101	29.7403	18.0313	25.1356	71.575	130.544	100.636	72.1972	36.5775	21.5443	29.1754	23.9706	15.9697	192.681	80.2346	127.566	128.311	97.2833
	53.2167	17.9625	18.0526	24.1333	38.8571	66.2933	112.912	99.9286	99.1538	49.0847	19.7564	24.25	20.2568	30.0128	156.459	81.9444	46.9868	112.924	83.7662
	43.8873	19.7083	21.7838	19.4925	19.9067	70.2623	120.177	108.177	170.641	90.2414	23.3846	18.3243	26.9138	29.7215	208.361	76.0519	97.4667	122.325	97.7222
	44.9655	13.9474	31.7458	22.2949	26.4868	47.4559	58.8904	136.6	107.214	92.381	28.8816	27.2923	21.55	20.775	190.81	66.3784	83.4366	65.0469	91.2568
	22.3158	22.473	20.8219	17.377	34.7089	72.4531	84.0633	91.5667	71.0822	80.3393	27.2319	24.0633	18.5769	18.0308	156.197	68.2987	124.467	127.286	85.3649
	72.6721	15.5088	26.8103	18.5732	33.0137	102.522	46.5139	100.588	104.329	112.556	23.678	21.5065	23.5135	17.6389	172.5	76.7778	105.615	144.013	78.4035
	42.2286	18.3333	36.087	22.1923	23.1739	74.0536	116	123.771	106.59	122.175	21.4853	22.4545	23.8429	16.9231	65.4545	78.5823	125.685	45.5556	85.4444
	47.8955	18.5862	32.9661	20.3973	29.3382	85.4138	122.174	139.629	118.831	86.5	25.7949	27	22.975	37.9848	143.228	56.1013	101.29	137.051	100.308
	41.9385	11.9571	23.0759	23.9014	37.0476	62.8101	118.244	137.763	171.153	30.6438	24.4074	22.6866	25.8462	27.0357	140.463	86.0769	99.4568	94.0678	44.1053
	52.1639	9.67188	15.4853	20	24.3824	42.8904	77.4091	108.015	123	36.6316	18.557	19.2769	23.0133	22.1646	123.164	96.931	128.259	151.829	76.8889
	47.3	19.2237	15.9333	20.9851	31.3939	80.8333	103.631	78.6892	103.987	106	27.6494	27.0455	24.4483	23.2679	191.324	75.9231	131.339	45.1667	85.9744
	45.2532	22.641	15.7361	18.4028	30.1579	63.9873	86.3438	93.2949	116.893	132.773	26.1875	21.5345	22.3676	25.377	194.127	65.1125	125.915	40.5763	68
	55	11.1842	33.8841	18.6812	35.3974	72.8841	64.7342	143.225	108.838	101.523	33.8406	17.9464	22.9367	24.7273	167.789	87.4872	115.803	145.731	33.0533
	65.6154	13.5068	22.15	13.5909	33.4853	47.5507	129.296	158.831	138.457	115.436	26.2456	20.8169	23.45	23.8983	168.914	58.039	136.211	89.3247	71.8333
	49.6104	28	26.8961	26.0152	21.5915	58.9483	46.4079	130.492	60.6667	41.3784	21.0328	24.8382	20.6056	21.8784	141.729	111.061	44.8448	75.3377	70.5139
	53.3731	12.1644	43.0946	18.55	33.3067	25.1207	111.866	114.566	97.3286	85.5875	21	31.1316	24.2368	19.9492	167.844	88.5893	131.548	86.4762	59.0563
	64.8987	17.0385	27.3667	20.8947	26.1719	80.1803	93.25	112.094	162.278	85.9655	28.5769	22.3026	26.2	22.0375	173.686	72.4304	48.6842	100.918	42.7813
	47.3378	19.8923	30.0847	19.3718	26.0405	73.7595	40.6479	79.9726	99.8312	40.2687	26.3151	22.1549	20.1711	22.3143	195.344	77.1579	110.377	98.8667	78.4559
	48.9737	18.1129	36.5	20.7419	36.3731	54.2679	55.75	99.8983	106.75	125.707	25.7342	26.1711	21.7297	19.9726	149.298	73.6753	110.644	73.8103	109.088
	44.3091	20.5875	25.7465	20.125	30.6329	84.9194	102.732	45.5224	92.2059	72.8276	29.069	19.6087	22.4933	17.2985	175.5	100.848	103.569	121.82	52.1071
	54.2667	10.0857	22.675	22.3667	25.9138	58.9079	102.73	114.052	153.605	38.7258	25.5455	25.5593	22.5714	23.9474	130.657	61.25	56.013	144.873	56.7975
	66.5614	14.9714	24.3538	14.5763	21.1304	49.2083	91	76.6719	91.4154	127.873	25.9464	29.3529	23.475	16.4615	131.854	85.5538	108.26	76.1186	65.7586
	45.831	14.0694	38.0893	19.25	33.0714	70.3971	125.904	130.929	64.0154	31.3833	25.4521	25.3934	8.63158	16.4459	168.231	56.9714	91.4737	134.118	41.5634
[truncated: 13,056 more rows]
