# Supplementary material for: Fibrodysplasia ossificans progressiva mutant ACVR1 signals by multiple modalities in the developing zebrafish
Source: eLife. 2020 Sep 8;9:e53761. doi: 10.7554/eLife.53761 (PMC7478894; doi:10.7554/eLife.53761)
Supplement: Figure 6—source data 1. [file elife-53761-fig6-data1.xlsx]

## Sheet: Fig 6a
bmpr1aa+/-,ab-/- incross	3 pooled experiments
		WT/het				Mut
		noinjection	6ab8MO	mRH	6ab8MO mRH	noinjection	6ab8MO	mRH	6ab8MO mRH
Total number of embryos in each category
	Figure column	1	2	3	4	5	6	7	8
	Genotype	bmpr1a+/-	bmpr1a+/-	bmpr1a+/-	bmpr1a+/-	bmpr1a+/-	bmpr1a+/-	bmpr1a-/-	bmpr1a-/-
	Morpholino KD	none	bmpr1b and acvr1l	none	bmpr1b and acvr1l	none	bmpr1b and acvr1l	none	bmpr1b and acvr1l
	Receptor mRNA	none	mouse Acvr1-R206H	none	mouse Acvr1-R206H	none	mouse Acvr1-R206H	none	mouse Acvr1-R206H
	C5	0	74	0	8	0	36	0	2
	C4	0	2	0	2	76	0	1	0
	C3	0	3	0	0	0	0	0	0
	C2	0	1	0	0	0	0	0	0
	C1	0	0	0	0	0	0	0	0
	WT	150	0	5	0	0	0	0	0
	V1	0	0	8	10	0	0	2	2
	V2	0	0	11	14	0	0	9	9
	V3	0	0	12	12	0	0	11	9
	V4	0	0	16	16	0	0	4	3
	V5	0	0	46	27	0	0	4	5
	Total	150	80	98	89	76	36	31	30
Percent embryos in each category
	Figure column	1	2	3	4	5	6	7	8
	Genotype	bmpr1a+/-	bmpr1a+/-	bmpr1a+/-	bmpr1a+/-	bmpr1a+/-	bmpr1a+/-	bmpr1a-/-	bmpr1a-/-
	Morpholino KD	none	bmpr1b and acvr1l	none	bmpr1b and acvr1l	none	bmpr1b and acvr1l	none	bmpr1b and acvr1l
	Receptor mRNA	none	mouse Acvr1-R206H	none	mouse Acvr1-R206H	none	mouse Acvr1-R206H	none	mouse Acvr1-R206H
C5	1	0	92.5	0	8.98876	0	100	0	6.66667
C4	2	0	2.5	0	2.24719	100	0	3.22581	0
C3	3	0	3.75	0	0	0	0	0	0
C2	4	0	1.25	0	0	0	0	0	0
C1	5	0	0	0	0	0	0	0	0
WT	6	100	0	5.10204	0	0	0	0	0
V1	7	0	0	8.16327	11.236	0	0	6.45161	6.66667
V2	8	0	0	11.2245	15.7303	0	0	29.0323	30
V3	9	0	0	12.2449	13.4831	0	0	35.4839	30
V4	10	0	0	16.3265	17.9775	0	0	12.9032	10
V5	11	0	0	46.9388	30.3371	0	0	12.9032	16.6667
	Figure Column number	1	2	3	4	5	6	7	8
		1	2	3	4	5	6	7	8
		1	2	3	4	5	6	7	8
		1	2	3	4	5	6	7	8
		1	2	3	4	5	6	7	8
		1	2	3	4	5	6	7	8
		1	2	3	4	5	6	7	8
		1	2	3	4	5	6	7	8
		1	2	3	4	5	6	7	8
		1	2	3	4	5	6	7	8
		1	2	3	4	5	6	7	8

## Sheet: Fig 6b
bmpr1aa+/-,ab-/- incross	3 pooled experiments
		WT/het				Mut
		noinjection	6ab8MO	mRH	6ab8MO mRH	noinjection	6ab8MO	mRH	6ab8MO mRH
Total number of embryos in each category
	Figure column	1	2	3	4	5	6	7	8
	Genotype	bmpr1a+/-	bmpr1a+/-	bmpr1a+/-	bmpr1a+/-	bmpr1a+/-	bmpr1a+/-	bmpr1a-/-	bmpr1a-/-
	Morpholino KD	none	bmpr1b and acvr1l	none	bmpr1b and acvr1l	none	bmpr1b and acvr1l	none	bmpr1b and acvr1l
	Receptor mRNA	none	mouse ligand binding mutant Acvr1-R206H	none	mouse ligand binding mutant Acvr1-R206H	none	mouse ligand binding mutant Acvr1-R206H	none	mouse ligand binding mutant Acvr1-R206H
	C5	0	74	0	2	0	36	0	5
	C4	0	2	0	3	76	0	1	0
	C3	0	3	0	0	0	0	0	0
	C2	0	1	1	0	0	0	1	0
	C1	0	0	1	0	0	0	0	0
	WT	150	0	7	0	0	0	0	2
	V1	0	0	18	11	0	0	1	3
	V2	0	0	15	61	0	0	11	17
	V3	0	0	13	34	0	0	5	7
	V4	0	0	14	10	0	0	3	1
	V5	0	0	23	6	0	0	4	2
	Total	150	80	92	127	76	36	26	37
Percent embryos in each category
	Figure column	1	2	3	4	5	6	7	8
	Genotype	bmpr1a+/-	bmpr1a+/-	bmpr1a+/-	bmpr1a+/-	bmpr1a+/-	bmpr1a+/-	bmpr1a-/-	bmpr1a-/-
	Morpholino KD	none	bmpr1b and acvr1l	none	bmpr1b and acvr1l	none	bmpr1b and acvr1l	none	bmpr1b and acvr1l
	Receptor mRNA	none	mouse ligand binding mutant Acvr1-R206H	none	mouse ligand binding mutant Acvr1-R206H	none	mouse ligand binding mutant Acvr1-R206H	none	mouse ligand binding mutant Acvr1-R206H
C5	1	0	92.5	0	1.5748	0	100	0	13.5135
C4	2	0	2.5	0	2.3622	100	0	3.84615	0
C3	3	0	3.75	0	0	0	0	0	0
C2	4	0	1.25	1.08696	0	0	0	3.84615	0
C1	5	0	0	1.08696	0	0	0	0	0
WT	6	100	0	7.6087	0	0	0	0	5.40541
V1	7	0	0	19.5652	8.66142	0	0	3.84615	8.10811
V2	8	0	0	16.3043	48.0315	0	0	42.3077	45.9459
V3	9	0	0	14.1304	26.7717	0	0	19.2308	18.9189
V4	10	0	0	15.2174	7.87402	0	0	11.5385	2.7027
V5	11	0	0	25	4.72441	0	0	15.3846	5.40541
	Figure Column number	1	2	3	4	5	6	7	8
		1	2	3	4	5	6	7	8
		1	2	3	4	5	6	7	8
		1	2	3	4	5	6	7	8
		1	2	3	4	5	6	7	8
		1	2	3	4	5	6	7	8
		1	2	3	4	5	6	7	8
		1	2	3	4	5	6	7	8
		1	2	3	4	5	6	7	8
		1	2	3	4	5	6	7	8
		1	2	3	4	5	6	7	8
