# Supplementary material for: Fibrodysplasia ossificans progressiva mutant ACVR1 signals by multiple modalities in the developing zebrafish
Source: eLife. 2020 Sep 8;9:e53761. doi: 10.7554/eLife.53761 (PMC7478894; doi:10.7554/eLife.53761)
Supplement: Figure 7—source data 1. [file elife-53761-fig7-data1.xlsx]

## Sheet: Fig 7a
bmpr1aa+/-,ab-/- incross	4 pooled experiments, and 2 experiments with controls only
Total number of embryos in each category
	Figure column	1	2	3	4	5	6	7	8	9	10	11	12	13	14	15	16
	Genotype	bmpr1a+/-	bmpr1a+/-	bmpr1a+/-	bmpr1a+/-	bmpr1a+/-	bmpr1a+/-	bmpr1a+/-	bmpr1a+/-	bmpr1a-/-	bmpr1a-/-	bmpr1a-/-	bmpr1a-/-	bmpr1a-/-	bmpr1a-/-	bmpr1a-/-	bmpr1a-/-
	Morpholino KD	none	none	none	bmpr1b and acvr1l	bmpr1b and acvr1l	bmpr1b and acvr1l	bmpr1b and acvr1l	bmpr1b and acvr1l	none	none	none	bmpr1b and acvr1l	bmpr1b and acvr1l	bmpr1b and acvr1l	bmpr1b and acvr1l	bmpr1b and acvr1l
	Receptor mRNA	none	none	none	none	none	human ACVR1-R206H	human ACVR1-R206H	human ACVR1-R206H	none	none	none	none	none	human ACVR1-R206H	human ACVR1-R206H	human ACVR1-R206H
	Ligand mRNA	chordin	none	bmp7	none	bmp7	chordin	none	bmp7	chordin	none	bmp7	none	bmp7	chordin	none	bmp7
	C5	23	0	0	119	95	40	32	30	25	0	0	55	29	8	15	19
	C4	43	0	0	12	7	41	31	15	7	91	16	2	0	15	8	4
	C3	19	0	0	4	2	24	15	7	0	0	0	0	0	4	8	4
	C2	9	0	0	0	0	8	4	5	0	0	0	0	0	0	2	3
	C1	21	0	0	0	0	0	5	3	0	0	0	0	0	0	1	0
	WT	57	160	24	0	0	1	3	2	0	0	0	0	0	0	2	0
	V1	0	0	14	0	0	4	28	15	0	0	0	0	0	1	8	3
	V2	0	0	18	0	0	3	34	15	0	0	0	0	0	0	4	10
	V3	0	0	11	0	0	0	15	17	0	0	0	0	0	0	1	6
	V4	0	0	24	0	0	0	2	5	0	0	0	0	0	0	0	0
	V5	0	0	15	0	0	0	0	3	0	0	0	0	0	0	0	0
	Total	172	160	106	135	104	121	169	117	32	91	16	57	29	28	49	49
Percent embryos in each category
	Figure column	1	2	3	4	5	6	7	8	9	10	11	12	13	14	15	16
	Genotype	bmpr1a+/-	bmpr1a+/-	bmpr1a+/-	bmpr1a+/-	bmpr1a+/-	bmpr1a+/-	bmpr1a+/-	bmpr1a+/-	bmpr1a-/-	bmpr1a-/-	bmpr1a-/-	bmpr1a-/-	bmpr1a-/-	bmpr1a-/-	bmpr1a-/-	bmpr1a-/-
	Morpholino KD	none	none	none	bmpr1b and acvr1l	bmpr1b and acvr1l	bmpr1b and acvr1l	bmpr1b and acvr1l	bmpr1b and acvr1l	none	none	none	bmpr1b and acvr1l	bmpr1b and acvr1l	bmpr1b and acvr1l	bmpr1b and acvr1l	bmpr1b and acvr1l
	Receptor mRNA	none	none	none	none	none	human ACVR1-R206H	human ACVR1-R206H	human ACVR1-R206H	none	none	none	none	none	human ACVR1-R206H	human ACVR1-R206H	human ACVR1-R206H
	Ligand mRNA	chordin	none	bmp7	none	bmp7	chordin	none	bmp7	chordin	none	bmp7	none	bmp7	chordin	none	bmp7
C5	1	13.3721	0	0	88.1481	91.3462	33.0579	18.9349	25.641	78.125	0	0	96.4912	100	28.5714	30.6122	38.7755
C4	2	25	0	0	8.88889	6.73077	33.8843	18.3432	12.8205	21.875	100	100	3.50877	0	53.5714	16.3265	8.16327
C3	3	11.0465	0	0	2.96296	1.92308	19.8347	8.87574	5.98291	0	0	0	0	0	14.2857	16.3265	8.16327
C2	4	5.23256	0	0	0	0	6.61157	2.36686	4.2735	0	0	0	0	0	0	4.08163	6.12245
C1	5	12.2093	0	0	0	0	0	2.95858	2.5641	0	0	0	0	0	0	2.04082	0
WT	6	33.1395	100	22.6415	0	0	0.826446	1.77515	1.7094	0	0	0	0	0	0	4.08163	0
V1	7	0	0	13.2075	0	0	3.30579	16.568	12.8205	0	0	0	0	0	3.57143	16.3265	6.12245
V2	8	0	0	16.9811	0	0	2.47934	20.1183	12.8205	0	0	0	0	0	0	8.16327	20.4082
V3	9	0	0	10.3774	0	0	0	8.87574	14.5299	0	0	0	0	0	0	2.04082	12.2449
V4	10	0	0	22.6415	0	0	0	1.18343	4.2735	0	0	0	0	0	0	0	0
V5	11	0	0	14.1509	0	0	0	0	2.5641	0	0	0	0	0	0	0	0
	Figure Column number	1	2	3	4	5	6	7	8	9	10	11	12	13	14	15	16
		1	2	3	4	5	6	7	8	9	10	11	12	13	14	15	16
		1	2	3	4	5	6	7	8	9	10	11	12	13	14	15	16
		1	2	3	4	5	6	7	8	9	10	11	12	13	14	15	16
		1	2	3	4	5	6	7	8	9	10	11	12	13	14	15	16
		1	2	3	4	5	6	7	8	9	10	11	12	13	14	15	16
		1	2	3	4	5	6	7	8	9	10	11	12	13	14	15	16
		1	2	3	4	5	6	7	8	9	10	11	12	13	14	15	16
		1	2	3	4	5	6	7	8	9	10	11	12	13	14	15	16
		1	2	3	4	5	6	7	8	9	10	11	12	13	14	15	16
		1	2	3	4	5	6	7	8	9	10	11	12	13	14	15	16
